# Supplementary material for: Genomic dissection of an extended phenotype: Oak galling by a cynipid gall wasp
Source: PLoS Genet. 2019 Nov 4;15(11):e1008398. doi: 10.1371/journal.pgen.1008398 (PMC6855507; doi:10.1371/journal.pgen.1008398)
Supplement: S4 File — Annotations for transcripts included in the differential analysis experiments created with the Trinotate pipeline. File contains transcripts TRINITY_DN76618_c5_g1 to TRINITY_DN236370_c0_g1. (CSV) [file pgen.1008398.s004.csv]

TRINITY_DN76618_c5_g1	TRINITY_DN76618_c5_g1_i2	SILD_FORIN^SILD_FORIN^Q:168-581,H:7-144^65.2%ID^E:4.2e-45^RecName: Full=Secoisolariciresinol dehydrogenase;^Eukaryota; Viridiplantae; Streptophyta; Embryophyta; Tracheophyta; Spermatophyta; Magnoliophyta; eudicotyledons; Gunneridae; Pentapetalae; asterids; lamiids; Lamiales; Oleaceae; Forsythieae; Forsythia	.	TRINITY_DN76618_c5_g1_i2.p1	153-581[+]	SILD_FORIN^SILD_FORIN^Q:6-143,H:7-144^65.2%ID^E:3.1e-45^RecName: Full=Secoisolariciresinol dehydrogenase;^Eukaryota; Viridiplantae; Streptophyta; Embryophyta; Tracheophyta; Spermatophyta; Magnoliophyta; eudicotyledons; Gunneridae; Pentapetalae; asterids; lamiids; Lamiales; Oleaceae; Forsythieae; Forsythia	PF00106.24^adh_short^short chain dehydrogenase^17-140^E:9.8e-32`PF08659.9^KR^KR domain^19-128^E:1.6e-08`PF01370.20^Epimerase^NAD dependent epimerase/dehydratase family^19-113^E:2.5e-05`PF13561.5^adh_short_C2^Enoyl-(Acyl carrier protein) reductase^23-139^E:1.1e-29	.	.	.	.	GO:0102911^molecular_function^(-)-secoisolariciresinol dehydrogenase activity`GO:0009807^biological_process^lignan biosynthetic process	GO:0003824^molecular_function^catalytic activity`GO:0050662^molecular_function^coenzyme binding	.	.
TRINITY_DN76618_c3_g1	TRINITY_DN76618_c3_g1_i1	SAR2_SOLLC^SAR2_SOLLC^Q:323-580,H:19-102^57%ID^E:1.3e-17^RecName: Full=GTP-binding protein SAR2;^Eukaryota; Viridiplantae; Streptophyta; Embryophyta; Tracheophyta; Spermatophyta; Magnoliophyta; eudicotyledons; Gunneridae; Pentapetalae; asterids; lamiids; Solanales; Solanaceae; Solanoideae; Solaneae; Solanum; Lycopersicon	.	TRINITY_DN76618_c3_g1_i1.p1	2-598[+]	SAR2_SOLLC^SAR2_SOLLC^Q:108-193,H:19-102^57%ID^E:1.3e-17^RecName: Full=GTP-binding protein SAR2;^Eukaryota; Viridiplantae; Streptophyta; Embryophyta; Tracheophyta; Spermatophyta; Magnoliophyta; eudicotyledons; Gunneridae; Pentapetalae; asterids; lamiids; Solanales; Solanaceae; Solanoideae; Solaneae; Solanum; Lycopersicon	PF00025.20^Arf^ADP-ribosylation factor family^108-193^E:1.1e-13	.	ExpAA=52.41^PredHel=3^Topology=o20-39i52-74o78-100i	ENOG410YIKI^Small GTPase component of the coat protein complex II (COPII) which promotes the formation of transport vesicles from the endoplasmic reticulum (ER). The coat has two main functions, the physical deformation of the endoplasmic reticulum membrane into vesicles and the selection of cargo molecules. SAR1 controls the coat assembly in a stepwise manner. Activated SAR1-GTP binds to membran…	KEGG:sly:543958`KO:K07953	GO:0005783^cellular_component^endoplasmic reticulum`GO:0005794^cellular_component^Golgi apparatus`GO:0005525^molecular_function^GTP binding`GO:0006886^biological_process^intracellular protein transport`GO:0016192^biological_process^vesicle-mediated transport	GO:0005525^molecular_function^GTP binding	.	.
TRINITY_DN76618_c4_g1	TRINITY_DN76618_c4_g1_i1	.	.	TRINITY_DN76618_c4_g1_i1.p1	722-1042[-]	.	.	.	.	.	.	.	.	.	.
TRINITY_DN76618_c6_g3	TRINITY_DN76618_c6_g3_i1	FY_ARATH^FY_ARATH^Q:585-743,H:451-499^64.8%ID^E:6.5e-08^RecName: Full=Flowering time control protein FY;^Eukaryota; Viridiplantae; Streptophyta; Embryophyta; Tracheophyta; Spermatophyta; Magnoliophyta; eudicotyledons; Gunneridae; Pentapetalae; rosids; malvids; Brassicales; Brassicaceae; Camelineae; Arabidopsis	.	TRINITY_DN76618_c6_g3_i1.p1	627-1358[+]	.	.	.	.	.	.	.	.	.	.
TRINITY_DN76618_c6_g3	TRINITY_DN76618_c6_g3_i2	.	.	TRINITY_DN76618_c6_g3_i2.p1	166-519[-]	.	.	.	.	.	.	.	.	.	.
TRINITY_DN76685_c1_g1	TRINITY_DN76685_c1_g1_i9	.	.	TRINITY_DN76685_c1_g1_i9.p1	3-614[-]	.	.	.	.	.	.	.	.	.	.
TRINITY_DN76685_c1_g1	TRINITY_DN76685_c1_g1_i5	.	.	TRINITY_DN76685_c1_g1_i5.p1	275-802[-]	.	.	.	.	.	.	.	.	.	.
TRINITY_DN76685_c1_g1	TRINITY_DN76685_c1_g1_i4	.	.	TRINITY_DN76685_c1_g1_i4.p1	102-530[+]	.	.	.	.	.	.	.	.	.	.
TRINITY_DN76685_c1_g1	TRINITY_DN76685_c1_g1_i7	.	.	TRINITY_DN76685_c1_g1_i7.p1	243-1118[-]	.	.	.	.	.	.	.	.	.	.
TRINITY_DN76685_c1_g1	TRINITY_DN76685_c1_g1_i6	.	.	TRINITY_DN76685_c1_g1_i6.p1	275-1150[-]	.	.	.	.	.	.	.	.	.	.
TRINITY_DN76685_c1_g1	TRINITY_DN76685_c1_g1_i1	.	.	.	.	.	.	.	.	.	.	.	.	.	.
TRINITY_DN76685_c1_g1	TRINITY_DN76685_c1_g1_i3	.	.	.	.	.	.	.	.	.	.	.	.	.	.
TRINITY_DN76685_c1_g1	TRINITY_DN76685_c1_g1_i2	.	.	TRINITY_DN76685_c1_g1_i2.p1	3-614[-]	.	.	.	.	.	.	.	.	.	.
TRINITY_DN76685_c1_g1	TRINITY_DN76685_c1_g1_i11	.	.	TRINITY_DN76685_c1_g1_i11.p1	2-301[+]	.	.	.	.	.	.	.	.	.	.
TRINITY_DN76685_c1_g1	TRINITY_DN76685_c1_g1_i10	.	.	TRINITY_DN76685_c1_g1_i10.p1	243-770[-]	.	.	.	.	.	.	.	.	.	.
TRINITY_DN76685_c1_g1	TRINITY_DN76685_c1_g1_i13	.	.	TRINITY_DN76685_c1_g1_i13.p1	275-1150[-]	.	.	.	.	.	.	.	.	.	.
TRINITY_DN76685_c1_g1	TRINITY_DN76685_c1_g1_i12	.	.	TRINITY_DN76685_c1_g1_i12.p1	70-498[+]	.	.	.	.	.	.	.	.	.	.
TRINITY_DN76685_c2_g1	TRINITY_DN76685_c2_g1_i2	MD15A_ARATH^MD15A_ARATH^Q:2218-2,H:545-1304^31%ID^E:4.9e-60^RecName: Full=Mediator of RNA polymerase II transcription subunit 15a;^Eukaryota; Viridiplantae; Streptophyta; Embryophyta; Tracheophyta; Spermatophyta; Magnoliophyta; eudicotyledons; Gunneridae; Pentapetalae; rosids; malvids; Brassicales; Brassicaceae; Camelineae; Arabidopsis	.	TRINITY_DN76685_c2_g1_i2.p1	2-2626[-]	MD15A_ARATH^MD15A_ARATH^Q:137-875,H:545-1304^31%ID^E:4.3e-60^RecName: Full=Mediator of RNA polymerase II transcription subunit 15a;^Eukaryota; Viridiplantae; Streptophyta; Embryophyta; Tracheophyta; Spermatophyta; Magnoliophyta; eudicotyledons; Gunneridae; Pentapetalae; rosids; malvids; Brassicales; Brassicaceae; Camelineae; Arabidopsis	.	.	.	ENOG4111KNE^NA	KEGG:ath:AT1G15780`KO:K14972	GO:0016592^cellular_component^mediator complex`GO:0005634^cellular_component^nucleus`GO:0031490^molecular_function^chromatin DNA binding`GO:0003713^molecular_function^transcription coactivator activity`GO:0045723^biological_process^positive regulation of fatty acid biosynthetic process`GO:0006355^biological_process^regulation of transcription, DNA-templated`GO:0009751^biological_process^response …	.	.	.
TRINITY_DN76685_c2_g1	TRINITY_DN76685_c2_g1_i3	.	.	TRINITY_DN76685_c2_g1_i3.p1	108-665[-]	.	.	.	.	.	.	.	.	.	.
TRINITY_DN76685_c2_g1	TRINITY_DN76685_c2_g1_i1	MD15A_ARATH^MD15A_ARATH^Q:2218-2,H:545-1304^31%ID^E:4.7e-60^RecName: Full=Mediator of RNA polymerase II transcription subunit 15a;^Eukaryota; Viridiplantae; Streptophyta; Embryophyta; Tracheophyta; Spermatophyta; Magnoliophyta; eudicotyledons; Gunneridae; Pentapetalae; rosids; malvids; Brassicales; Brassicaceae; Camelineae; Arabidopsis	.	TRINITY_DN76685_c2_g1_i1.p1	2-2287[-]	MD15A_ARATH^MD15A_ARATH^Q:24-762,H:545-1304^31%ID^E:3.7e-60^RecName: Full=Mediator of RNA polymerase II transcription subunit 15a;^Eukaryota; Viridiplantae; Streptophyta; Embryophyta; Tracheophyta; Spermatophyta; Magnoliophyta; eudicotyledons; Gunneridae; Pentapetalae; rosids; malvids; Brassicales; Brassicaceae; Camelineae; Arabidopsis	.	.	.	ENOG4111KNE^NA	KEGG:ath:AT1G15780`KO:K14972	GO:0016592^cellular_component^mediator complex`GO:0005634^cellular_component^nucleus`GO:0031490^molecular_function^chromatin DNA binding`GO:0003713^molecular_function^transcription coactivator activity`GO:0045723^biological_process^positive regulation of fatty acid biosynthetic process`GO:0006355^biological_process^regulation of transcription, DNA-templated`GO:0009751^biological_process^response …	.	.	.
TRINITY_DN76685_c2_g1	TRINITY_DN76685_c2_g1_i4	.	.	.	.	.	.	.	.	.	.	.	.	.	.
TRINITY_DN76664_c3_g1	TRINITY_DN76664_c3_g1_i9	.	.	TRINITY_DN76664_c3_g1_i9.p1	1151-1636[+]	.	.	.	.	.	.	.	.	.	.
TRINITY_DN76664_c3_g1	TRINITY_DN76664_c3_g1_i3	.	.	.	.	.	.	.	.	.	.	.	.	.	.
TRINITY_DN76664_c3_g1	TRINITY_DN76664_c3_g1_i2	.	.	.	.	.	.	.	.	.	.	.	.	.	.
TRINITY_DN76664_c3_g1	TRINITY_DN76664_c3_g1_i7	.	.	.	.	.	.	.	.	.	.	.	.	.	.
TRINITY_DN76664_c3_g1	TRINITY_DN76664_c3_g1_i6	.	.	.	.	.	.	.	.	.	.	.	.	.	.
TRINITY_DN76664_c3_g1	TRINITY_DN76664_c3_g1_i4	.	.	.	.	.	.	.	.	.	.	.	.	.	.
TRINITY_DN76664_c2_g1	TRINITY_DN76664_c2_g1_i2	LHPL3_HUMAN^LHPL3_HUMAN^Q:274-876,H:20-220^46.8%ID^E:6.9e-45^RecName: Full=LHFPL tetraspan subfamily member 3 protein {ECO:0000312|HGNC:HGNC:6589};^Eukaryota; Metazoa; Chordata; Craniata; Vertebrata; Euteleostomi; Mammalia; Eutheria; Euarchontoglires; Primates; Haplorrhini; Catarrhini; Hominidae; Homo	.	TRINITY_DN76664_c2_g1_i2.p1	250-1137[+]	LHPL3_HUMAN^LHPL3_HUMAN^Q:9-209,H:20-220^46.8%ID^E:3.8e-45^RecName: Full=LHFPL tetraspan subfamily member 3 protein {ECO:0000312|HGNC:HGNC:6589};^Eukaryota; Metazoa; Chordata; Craniata; Vertebrata; Euteleostomi; Mammalia; Eutheria; Euarchontoglires; Primates; Haplorrhini; Catarrhini; Hominidae; Homo	PF10242.8^L_HMGIC_fpl^Lipoma HMGIC fusion partner-like protein^25-202^E:2.2e-51	.	ExpAA=90.58^PredHel=4^Topology=i24-46o99-121i128-150o177-199i	ENOG410XSUB^auditory receptor cell stereocilium organization	KEGG:hsa:375612	GO:0016021^cellular_component^integral component of membrane	.	.	.
TRINITY_DN76664_c2_g1	TRINITY_DN76664_c2_g1_i1	LHPL3_HUMAN^LHPL3_HUMAN^Q:247-849,H:20-220^46.8%ID^E:7.1e-45^RecName: Full=LHFPL tetraspan subfamily member 3 protein {ECO:0000312|HGNC:HGNC:6589};^Eukaryota; Metazoa; Chordata; Craniata; Vertebrata; Euteleostomi; Mammalia; Eutheria; Euarchontoglires; Primates; Haplorrhini; Catarrhini; Hominidae; Homo	.	TRINITY_DN76664_c2_g1_i1.p1	223-1110[+]	LHPL3_HUMAN^LHPL3_HUMAN^Q:9-209,H:20-220^46.8%ID^E:3.8e-45^RecName: Full=LHFPL tetraspan subfamily member 3 protein {ECO:0000312|HGNC:HGNC:6589};^Eukaryota; Metazoa; Chordata; Craniata; Vertebrata; Euteleostomi; Mammalia; Eutheria; Euarchontoglires; Primates; Haplorrhini; Catarrhini; Hominidae; Homo	PF10242.8^L_HMGIC_fpl^Lipoma HMGIC fusion partner-like protein^25-202^E:1.9e-51	.	ExpAA=90.67^PredHel=4^Topology=i24-46o99-121i128-150o177-199i	ENOG410XSUB^auditory receptor cell stereocilium organization	KEGG:hsa:375612	GO:0016021^cellular_component^integral component of membrane	.	.	.
TRINITY_DN76607_c1_g1	TRINITY_DN76607_c1_g1_i5	.	.	.	.	.	.	.	.	.	.	.	.	.	.
TRINITY_DN76607_c1_g1	TRINITY_DN76607_c1_g1_i4	APY6_ARATH^APY6_ARATH^Q:2245-1352,H:238-554^40.2%ID^E:2.9e-60^RecName: Full=Probable apyrase 6;^Eukaryota; Viridiplantae; Streptophyta; Embryophyta; Tracheophyta; Spermatophyta; Magnoliophyta; eudicotyledons; Gunneridae; Pentapetalae; rosids; malvids; Brassicales; Brassicaceae; Camelineae; Arabidopsis	.	TRINITY_DN76607_c1_g1_i4.p1	1343-1663[-]	APY6_ARATH^APY6_ARATH^Q:1-104,H:447-554^45.4%ID^E:1.8e-21^RecName: Full=Probable apyrase 6;^Eukaryota; Viridiplantae; Streptophyta; Embryophyta; Tracheophyta; Spermatophyta; Magnoliophyta; eudicotyledons; Gunneridae; Pentapetalae; rosids; malvids; Brassicales; Brassicaceae; Camelineae; Arabidopsis	.	.	ExpAA=23.52^PredHel=1^Topology=o61-83i	COG5371^Ectonucleoside triphosphate diphosphohydrolase	KEGG:ath:AT2G02970`KO:K01510	GO:0030659^cellular_component^cytoplasmic vesicle membrane`GO:0016021^cellular_component^integral component of membrane`GO:0102490^molecular_function^8-oxo-dGTP phosphohydrolase activity`GO:0005524^molecular_function^ATP binding`GO:0102485^molecular_function^dATP phosphohydrolase activity`GO:0102486^molecular_function^dCTP phosphohydrolase activity`GO:0102491^molecular_function^dGTP phosphohydrol…	.	.	.
TRINITY_DN76607_c1_g1	TRINITY_DN76607_c1_g1_i7	.	.	.	.	.	.	.	.	.	.	.	.	.	.
TRINITY_DN76607_c1_g1	TRINITY_DN76607_c1_g1_i6	APY6_ARATH^APY6_ARATH^Q:2122-1352,H:287-554^41.5%ID^E:6.8e-54^RecName: Full=Probable apyrase 6;^Eukaryota; Viridiplantae; Streptophyta; Embryophyta; Tracheophyta; Spermatophyta; Magnoliophyta; eudicotyledons; Gunneridae; Pentapetalae; rosids; malvids; Brassicales; Brassicaceae; Camelineae; Arabidopsis	.	TRINITY_DN76607_c1_g1_i6.p1	1343-2149[-]	APY6_ARATH^APY6_ARATH^Q:10-266,H:287-554^41.5%ID^E:3.1e-54^RecName: Full=Probable apyrase 6;^Eukaryota; Viridiplantae; Streptophyta; Embryophyta; Tracheophyta; Spermatophyta; Magnoliophyta; eudicotyledons; Gunneridae; Pentapetalae; rosids; malvids; Brassicales; Brassicaceae; Camelineae; Arabidopsis	PF01150.16^GDA1_CD39^GDA1/CD39 (nucleoside phosphatase) family^18-202^E:8.5e-16	.	ExpAA=25.12^PredHel=1^Topology=i223-245o	COG5371^Ectonucleoside triphosphate diphosphohydrolase	KEGG:ath:AT2G02970`KO:K01510	GO:0030659^cellular_component^cytoplasmic vesicle membrane`GO:0016021^cellular_component^integral component of membrane`GO:0102490^molecular_function^8-oxo-dGTP phosphohydrolase activity`GO:0005524^molecular_function^ATP binding`GO:0102485^molecular_function^dATP phosphohydrolase activity`GO:0102486^molecular_function^dCTP phosphohydrolase activity`GO:0102491^molecular_function^dGTP phosphohydrol…	GO:0016787^molecular_function^hydrolase activity	.	.
TRINITY_DN76607_c1_g1	TRINITY_DN76607_c1_g1_i1	APY6_ARATH^APY6_ARATH^Q:2257-1352,H:238-554^41.6%ID^E:7.3e-64^RecName: Full=Probable apyrase 6;^Eukaryota; Viridiplantae; Streptophyta; Embryophyta; Tracheophyta; Spermatophyta; Magnoliophyta; eudicotyledons; Gunneridae; Pentapetalae; rosids; malvids; Brassicales; Brassicaceae; Camelineae; Arabidopsis	.	TRINITY_DN76607_c1_g1_i1.p1	1343-1663[-]	APY6_ARATH^APY6_ARATH^Q:1-104,H:447-554^45.4%ID^E:1.8e-21^RecName: Full=Probable apyrase 6;^Eukaryota; Viridiplantae; Streptophyta; Embryophyta; Tracheophyta; Spermatophyta; Magnoliophyta; eudicotyledons; Gunneridae; Pentapetalae; rosids; malvids; Brassicales; Brassicaceae; Camelineae; Arabidopsis	.	.	ExpAA=23.52^PredHel=1^Topology=o61-83i	COG5371^Ectonucleoside triphosphate diphosphohydrolase	KEGG:ath:AT2G02970`KO:K01510	GO:0030659^cellular_component^cytoplasmic vesicle membrane`GO:0016021^cellular_component^integral component of membrane`GO:0102490^molecular_function^8-oxo-dGTP phosphohydrolase activity`GO:0005524^molecular_function^ATP binding`GO:0102485^molecular_function^dATP phosphohydrolase activity`GO:0102486^molecular_function^dCTP phosphohydrolase activity`GO:0102491^molecular_function^dGTP phosphohydrol…	.	.	.
TRINITY_DN76607_c1_g1	TRINITY_DN76607_c1_g1_i3	.	.	.	.	.	.	.	.	.	.	.	.	.	.
TRINITY_DN76607_c1_g1	TRINITY_DN76607_c1_g1_i2	APY6_ARATH^APY6_ARATH^Q:2122-1352,H:287-554^41.5%ID^E:3.3e-54^RecName: Full=Probable apyrase 6;^Eukaryota; Viridiplantae; Streptophyta; Embryophyta; Tracheophyta; Spermatophyta; Magnoliophyta; eudicotyledons; Gunneridae; Pentapetalae; rosids; malvids; Brassicales; Brassicaceae; Camelineae; Arabidopsis	.	TRINITY_DN76607_c1_g1_i2.p1	1343-1663[-]	APY6_ARATH^APY6_ARATH^Q:1-104,H:447-554^45.4%ID^E:1.8e-21^RecName: Full=Probable apyrase 6;^Eukaryota; Viridiplantae; Streptophyta; Embryophyta; Tracheophyta; Spermatophyta; Magnoliophyta; eudicotyledons; Gunneridae; Pentapetalae; rosids; malvids; Brassicales; Brassicaceae; Camelineae; Arabidopsis	.	.	ExpAA=23.52^PredHel=1^Topology=o61-83i	COG5371^Ectonucleoside triphosphate diphosphohydrolase	KEGG:ath:AT2G02970`KO:K01510	GO:0030659^cellular_component^cytoplasmic vesicle membrane`GO:0016021^cellular_component^integral component of membrane`GO:0102490^molecular_function^8-oxo-dGTP phosphohydrolase activity`GO:0005524^molecular_function^ATP binding`GO:0102485^molecular_function^dATP phosphohydrolase activity`GO:0102486^molecular_function^dCTP phosphohydrolase activity`GO:0102491^molecular_function^dGTP phosphohydrol…	.	.	.
TRINITY_DN76673_c1_g2	TRINITY_DN76673_c1_g2_i2	.	.	TRINITY_DN76673_c1_g2_i2.p1	3-383[-]	.	PF13516.5^LRR_6^Leucine Rich repeat^28-42^E:0.31`PF00560.32^LRR_1^Leucine Rich Repeat^30-46^E:0.4	.	.	.	.	.	GO:0005515^molecular_function^protein binding	.	.
TRINITY_DN76673_c1_g2	TRINITY_DN76673_c1_g2_i3	.	.	TRINITY_DN76673_c1_g2_i3.p1	1-351[-]	.	PF13855.5^LRR_8^Leucine rich repeat^43-101^E:7.8e-09`PF13516.5^LRR_6^Leucine Rich repeat^64-79^E:0.24`PF00560.32^LRR_1^Leucine Rich Repeat^66-87^E:0.22	.	.	.	.	.	GO:0005515^molecular_function^protein binding	.	.
TRINITY_DN76673_c1_g1	TRINITY_DN76673_c1_g1_i9	.	.	TRINITY_DN76673_c1_g1_i9.p1	3-614[-]	.	PF13855.5^LRR_8^Leucine rich repeat^9-50^E:4.4e-08`PF13516.5^LRR_6^Leucine Rich repeat^14-28^E:0.78`PF00560.32^LRR_1^Leucine Rich Repeat^15-37^E:0.62`PF13516.5^LRR_6^Leucine Rich repeat^37-51^E:0.036`PF00560.32^LRR_1^Leucine Rich Repeat^39-58^E:0.019`PF13855.5^LRR_8^Leucine rich repeat^62-121^E:2.4e-06`PF00560.32^LRR_1^Leucine Rich Repeat^164-186^E:0.38`PF13516.5^LRR_6^Leucine Rich repeat^186-201…	.	.	.	.	.	GO:0005515^molecular_function^protein binding	.	.
TRINITY_DN76673_c1_g1	TRINITY_DN76673_c1_g1_i8	.	.	.	.	.	.	.	.	.	.	.	.	.	.
TRINITY_DN76673_c1_g1	TRINITY_DN76673_c1_g1_i5	EIX2_SOLLC^EIX2_SOLLC^Q:535-104,H:478-620^41.7%ID^E:1.4e-22^RecName: Full=Receptor-like protein EIX2 {ECO:0000305};^Eukaryota; Viridiplantae; Streptophyta; Embryophyta; Tracheophyta; Spermatophyta; Magnoliophyta; eudicotyledons; Gunneridae; Pentapetalae; asterids; lamiids; Solanales; Solanaceae; Solanoideae; Solaneae; Solanum; Lycopersicon	.	TRINITY_DN76673_c1_g1_i5.p1	2-808[-]	.	PF00560.32^LRR_1^Leucine Rich Repeat^27-49^E:0.57`PF13516.5^LRR_6^Leucine Rich repeat^49-64^E:0.76`PF13855.5^LRR_8^Leucine rich repeat^50-111^E:8.6e-08`PF13516.5^LRR_6^Leucine Rich repeat^173-184^E:0.39`PF00560.32^LRR_1^Leucine Rich Repeat^174-212^E:2	.	.	.	.	.	GO:0005515^molecular_function^protein binding	.	.
TRINITY_DN76673_c1_g1	TRINITY_DN76673_c1_g1_i4	EIX1_SOLLC^EIX1_SOLLC^Q:535-308,H:482-557^47.4%ID^E:1.2e-10^RecName: Full=Receptor-like protein EIX1 {ECO:0000305};^Eukaryota; Viridiplantae; Streptophyta; Embryophyta; Tracheophyta; Spermatophyta; Magnoliophyta; eudicotyledons; Gunneridae; Pentapetalae; asterids; lamiids; Solanales; Solanaceae; Solanoideae; Solaneae; Solanum; Lycopersicon	.	TRINITY_DN76673_c1_g1_i4.p1	2-748[-]	.	PF00560.32^LRR_1^Leucine Rich Repeat^7-29^E:0.54`PF13516.5^LRR_6^Leucine Rich repeat^29-44^E:0.69`PF13855.5^LRR_8^Leucine rich repeat^30-91^E:8.8e-08`PF13516.5^LRR_6^Leucine Rich repeat^153-164^E:0.35	.	.	.	.	.	GO:0005515^molecular_function^protein binding	.	.
TRINITY_DN76673_c1_g1	TRINITY_DN76673_c1_g1_i7	EIX2_SOLLC^EIX2_SOLLC^Q:529-104,H:480-620^41.5%ID^E:1.6e-22^RecName: Full=Receptor-like protein EIX2 {ECO:0000305};^Eukaryota; Viridiplantae; Streptophyta; Embryophyta; Tracheophyta; Spermatophyta; Magnoliophyta; eudicotyledons; Gunneridae; Pentapetalae; asterids; lamiids; Solanales; Solanaceae; Solanoideae; Solaneae; Solanum; Lycopersicon	.	TRINITY_DN76673_c1_g1_i7.p1	2-1219[-]	.	PF13855.5^LRR_8^Leucine rich repeat^9-50^E:1.2e-07`PF13516.5^LRR_6^Leucine Rich repeat^14-28^E:1.9`PF00560.32^LRR_1^Leucine Rich Repeat^15-37^E:1.6`PF13516.5^LRR_6^Leucine Rich repeat^37-51^E:0.085`PF00560.32^LRR_1^Leucine Rich Repeat^39-58^E:0.047`PF00560.32^LRR_1^Leucine Rich Repeat^164-186^E:0.98`PF13855.5^LRR_8^Leucine rich repeat^188-248^E:1.4e-06`PF13516.5^LRR_6^Leucine Rich repeat^310-321^…	.	.	.	.	.	GO:0005515^molecular_function^protein binding	.	.
TRINITY_DN76673_c1_g1	TRINITY_DN76673_c1_g1_i6	.	.	TRINITY_DN76673_c1_g1_i6.p1	2-427[-]	.	PF13855.5^LRR_8^Leucine rich repeat^9-50^E:2.3e-08`PF13516.5^LRR_6^Leucine Rich repeat^14-28^E:0.48`PF00560.32^LRR_1^Leucine Rich Repeat^15-37^E:0.36`PF13516.5^LRR_6^Leucine Rich repeat^37-51^E:0.022`PF00560.32^LRR_1^Leucine Rich Repeat^39-58^E:0.011`PF13855.5^LRR_8^Leucine rich repeat^62-120^E:7.6e-07	.	.	.	.	.	GO:0005515^molecular_function^protein binding	.	.
TRINITY_DN76673_c1_g1	TRINITY_DN76673_c1_g1_i1	.	.	TRINITY_DN76673_c1_g1_i1.p1	77-388[-]	.	PF00560.32^LRR_1^Leucine Rich Repeat^1-23^E:0.66	.	.	.	.	.	GO:0005515^molecular_function^protein binding	.	.
TRINITY_DN76673_c1_g1	TRINITY_DN76673_c1_g1_i3	.	.	TRINITY_DN76673_c1_g1_i3.p1	74-466[-]	.	PF00560.32^LRR_1^Leucine Rich Repeat^3-22^E:0.32	.	.	.	.	.	GO:0005515^molecular_function^protein binding	.	.
TRINITY_DN76673_c1_g1	TRINITY_DN76673_c1_g1_i2	.	.	.	.	.	.	.	.	.	.	.	.	.	.
TRINITY_DN76673_c1_g1	TRINITY_DN76673_c1_g1_i20	.	.	.	.	.	.	.	.	.	.	.	.	.	.
TRINITY_DN76673_c1_g1	TRINITY_DN76673_c1_g1_i21	EIX1_SOLLC^EIX1_SOLLC^Q:529-308,H:484-557^47.3%ID^E:1.4e-10^RecName: Full=Receptor-like protein EIX1 {ECO:0000305};^Eukaryota; Viridiplantae; Streptophyta; Embryophyta; Tracheophyta; Spermatophyta; Magnoliophyta; eudicotyledons; Gunneridae; Pentapetalae; asterids; lamiids; Solanales; Solanaceae; Solanoideae; Solaneae; Solanum; Lycopersicon	.	TRINITY_DN76673_c1_g1_i21.p1	2-886[-]	.	PF00560.32^LRR_1^Leucine Rich Repeat^53-75^E:0.64`PF13855.5^LRR_8^Leucine rich repeat^77-137^E:9e-07`PF13516.5^LRR_6^Leucine Rich repeat^199-210^E:0.43	.	.	.	.	.	GO:0005515^molecular_function^protein binding	.	.
TRINITY_DN76673_c1_g1	TRINITY_DN76673_c1_g1_i22	EIX2_SOLLC^EIX2_SOLLC^Q:457-104,H:504-620^42.4%ID^E:3.5e-18^RecName: Full=Receptor-like protein EIX2 {ECO:0000305};^Eukaryota; Viridiplantae; Streptophyta; Embryophyta; Tracheophyta; Spermatophyta; Magnoliophyta; eudicotyledons; Gunneridae; Pentapetalae; asterids; lamiids; Solanales; Solanaceae; Solanoideae; Solaneae; Solanum; Lycopersicon	.	TRINITY_DN76673_c1_g1_i22.p1	2-463[-]	.	PF13516.5^LRR_6^Leucine Rich repeat^58-69^E:0.17`PF00560.32^LRR_1^Leucine Rich Repeat^59-97^E:0.84	.	.	.	.	.	GO:0005515^molecular_function^protein binding	.	.
TRINITY_DN76673_c1_g1	TRINITY_DN76673_c1_g1_i23	.	.	.	.	.	.	.	.	.	.	.	.	.	.
TRINITY_DN76673_c1_g1	TRINITY_DN76673_c1_g1_i15	.	.	TRINITY_DN76673_c1_g1_i15.p1	77-466[-]	.	PF13516.5^LRR_6^Leucine Rich repeat^2-12^E:0.79`PF00560.32^LRR_1^Leucine Rich Repeat^3-23^E:0.0079	.	.	.	.	.	GO:0005515^molecular_function^protein binding	.	.
TRINITY_DN76673_c1_g1	TRINITY_DN76673_c1_g1_i14	.	.	TRINITY_DN76673_c1_g1_i14.p1	74-466[-]	.	PF13516.5^LRR_6^Leucine Rich repeat^2-12^E:0.8`PF00560.32^LRR_1^Leucine Rich Repeat^3-23^E:0.008	.	.	.	.	.	GO:0005515^molecular_function^protein binding	.	.
TRINITY_DN76673_c1_g1	TRINITY_DN76673_c1_g1_i17	.	.	TRINITY_DN76673_c1_g1_i17.p1	74-388[-]	.	PF00560.32^LRR_1^Leucine Rich Repeat^1-23^E:0.68	.	.	.	.	.	GO:0005515^molecular_function^protein binding	.	.
TRINITY_DN76673_c1_g1	TRINITY_DN76673_c1_g1_i16	.	.	TRINITY_DN76673_c1_g1_i16.p1	3-521[-]	.	PF13516.5^LRR_6^Leucine Rich repeat^53-66^E:0.99`PF13855.5^LRR_8^Leucine rich repeat^54-114^E:3e-08`PF00560.32^LRR_1^Leucine Rich Repeat^55-68^E:1.8`PF00560.32^LRR_1^Leucine Rich Repeat^79-101^E:0.28`PF13516.5^LRR_6^Leucine Rich repeat^101-116^E:1`PF00560.32^LRR_1^Leucine Rich Repeat^103-124^E:0.44	.	.	.	.	.	GO:0005515^molecular_function^protein binding	.	.
TRINITY_DN76673_c1_g1	TRINITY_DN76673_c1_g1_i11	EIX1_SOLLC^EIX1_SOLLC^Q:465-214,H:181-266^42.5%ID^E:1.7e-07^RecName: Full=Receptor-like protein EIX1 {ECO:0000305};^Eukaryota; Viridiplantae; Streptophyta; Embryophyta; Tracheophyta; Spermatophyta; Magnoliophyta; eudicotyledons; Gunneridae; Pentapetalae; asterids; lamiids; Solanales; Solanaceae; Solanoideae; Solaneae; Solanum; Lycopersicon	.	TRINITY_DN76673_c1_g1_i11.p1	1-468[-]	.	PF13516.5^LRR_6^Leucine Rich repeat^62-77^E:0.17`PF00560.32^LRR_1^Leucine Rich Repeat^64-81^E:1.3`PF13516.5^LRR_6^Leucine Rich repeat^88-102^E:0.55`PF13855.5^LRR_8^Leucine rich repeat^89-148^E:4.4e-08`PF00560.32^LRR_1^Leucine Rich Repeat^89-111^E:0.41`PF13516.5^LRR_6^Leucine Rich repeat^111-125^E:0.25`PF00560.32^LRR_1^Leucine Rich Repeat^113-132^E:0.041	.	.	.	.	.	GO:0005515^molecular_function^protein binding	.	.
TRINITY_DN76673_c1_g1	TRINITY_DN76673_c1_g1_i10	.	.	.	.	.	.	.	.	.	.	.	.	.	.
TRINITY_DN76673_c1_g1	TRINITY_DN76673_c1_g1_i13	EIX1_SOLLC^EIX1_SOLLC^Q:202-8,H:481-545^50.8%ID^E:2.6e-10^RecName: Full=Receptor-like protein EIX1 {ECO:0000305};^Eukaryota; Viridiplantae; Streptophyta; Embryophyta; Tracheophyta; Spermatophyta; Magnoliophyta; eudicotyledons; Gunneridae; Pentapetalae; asterids; lamiids; Solanales; Solanaceae; Solanoideae; Solaneae; Solanum; Lycopersicon	.	TRINITY_DN76673_c1_g1_i13.p1	2-568[-]	.	PF13855.5^LRR_8^Leucine rich repeat^55-94^E:1.1e-06`PF00560.32^LRR_1^Leucine Rich Repeat^59-81^E:0.37`PF00560.32^LRR_1^Leucine Rich Repeat^83-104^E:0.12	.	.	.	.	.	GO:0005515^molecular_function^protein binding	.	.
TRINITY_DN76673_c1_g1	TRINITY_DN76673_c1_g1_i12	EIX1_SOLLC^EIX1_SOLLC^Q:535-308,H:482-557^46.1%ID^E:4.6e-10^RecName: Full=Receptor-like protein EIX1 {ECO:0000305};^Eukaryota; Viridiplantae; Streptophyta; Embryophyta; Tracheophyta; Spermatophyta; Magnoliophyta; eudicotyledons; Gunneridae; Pentapetalae; asterids; lamiids; Solanales; Solanaceae; Solanoideae; Solaneae; Solanum; Lycopersicon	.	TRINITY_DN76673_c1_g1_i12.p1	2-778[-]	.	PF13516.5^LRR_6^Leucine Rich repeat^39-54^E:0.43`PF13855.5^LRR_8^Leucine rich repeat^40-101^E:1.5e-07`PF13516.5^LRR_6^Leucine Rich repeat^163-174^E:0.37	.	.	.	.	.	GO:0005515^molecular_function^protein binding	.	.
TRINITY_DN76673_c1_g1	TRINITY_DN76673_c1_g1_i19	.	.	TRINITY_DN76673_c1_g1_i19.p1	3-614[-]	.	PF13855.5^LRR_8^Leucine rich repeat^9-50^E:1.3e-07`PF13516.5^LRR_6^Leucine Rich repeat^14-28^E:0.78`PF00560.32^LRR_1^Leucine Rich Repeat^15-37^E:0.62`PF13516.5^LRR_6^Leucine Rich repeat^37-51^E:0.36`PF00560.32^LRR_1^Leucine Rich Repeat^39-60^E:0.056`PF13855.5^LRR_8^Leucine rich repeat^62-121^E:2.1e-08`PF00560.32^LRR_1^Leucine Rich Repeat^164-186^E:0.38`PF13516.5^LRR_6^Leucine Rich repeat^186-201^…	.	.	.	.	.	GO:0005515^molecular_function^protein binding	.	.
TRINITY_DN76673_c1_g1	TRINITY_DN76673_c1_g1_i18	EIX2_SOLLC^EIX2_SOLLC^Q:714-340,H:477-601^42.4%ID^E:3.6e-21^RecName: Full=Receptor-like protein EIX2 {ECO:0000305};^Eukaryota; Viridiplantae; Streptophyta; Embryophyta; Tracheophyta; Spermatophyta; Magnoliophyta; eudicotyledons; Gunneridae; Pentapetalae; asterids; lamiids; Solanales; Solanaceae; Solanoideae; Solaneae; Solanum; Lycopersicon	.	TRINITY_DN76673_c1_g1_i18.p1	1-1080[-]	RLP15_ARATH^RLP15_ARATH^Q:128-245,H:314-430^32.2%ID^E:5.5e-06^RecName: Full=Receptor-like protein 15 {ECO:0000303|PubMed:18434605};^Eukaryota; Viridiplantae; Streptophyta; Embryophyta; Tracheophyta; Spermatophyta; Magnoliophyta; eudicotyledons; Gunneridae; Pentapetalae; rosids; malvids; Brassicales; Brassicaceae; Camelineae; Arabidopsis	PF00560.32^LRR_1^Leucine Rich Repeat^59-81^E:0.89`PF00560.32^LRR_1^Leucine Rich Repeat^83-104^E:0.28`PF00560.32^LRR_1^Leucine Rich Repeat^327-348^E:0.46	.	.	COG4886^leucine Rich Repeat	KEGG:ath:AT1G74190	GO:0016021^cellular_component^integral component of membrane`GO:0005886^cellular_component^plasma membrane	GO:0005515^molecular_function^protein binding	.	.
TRINITY_DN76673_c0_g1	TRINITY_DN76673_c0_g1_i1	.	.	TRINITY_DN76673_c0_g1_i1.p1	25-483[-]	.	PF13855.5^LRR_8^Leucine rich repeat^10-47^E:9.8e-08`PF13516.5^LRR_6^Leucine Rich repeat^13-27^E:0.2`PF12799.6^LRR_4^Leucine Rich repeats (2 copies)^14-55^E:8.6e-07`PF00560.32^LRR_1^Leucine Rich Repeat^14-36^E:0.63`PF13855.5^LRR_8^Leucine rich repeat^33-73^E:8.7e-07`PF13516.5^LRR_6^Leucine Rich repeat^36-49^E:0.2`PF00560.32^LRR_1^Leucine Rich Repeat^38-56^E:0.27`PF13855.5^LRR_8^Leucine rich repeat…	sigP:1^21^0.531^YES	.	.	.	.	GO:0005515^molecular_function^protein binding	.	.
TRINITY_DN76673_c0_g1	TRINITY_DN76673_c0_g1_i2	.	.	TRINITY_DN76673_c0_g1_i2.p1	2-313[-]	.	PF13855.5^LRR_8^Leucine rich repeat^10-47^E:4.1e-08`PF13516.5^LRR_6^Leucine Rich repeat^13-27^E:0.11`PF12799.6^LRR_4^Leucine Rich repeats (2 copies)^14-55^E:5.2e-07`PF00560.32^LRR_1^Leucine Rich Repeat^14-36^E:0.33`PF13516.5^LRR_6^Leucine Rich repeat^36-49^E:0.11`PF00560.32^LRR_1^Leucine Rich Repeat^38-56^E:0.14`PF00560.32^LRR_1^Leucine Rich Repeat^62-84^E:0.39	sigP:1^21^0.531^YES	.	.	.	.	GO:0005515^molecular_function^protein binding	.	.
TRINITY_DN76674_c1_g1	TRINITY_DN76674_c1_g1_i9	ATL59_ARATH^ATL59_ARATH^Q:891-544,H:69-181^56%ID^E:2.8e-32^RecName: Full=E3 ubiquitin-protein ligase ATL59;^Eukaryota; Viridiplantae; Streptophyta; Embryophyta; Tracheophyta; Spermatophyta; Magnoliophyta; eudicotyledons; Gunneridae; Pentapetalae; rosids; malvids; Brassicales; Brassicaceae; Camelineae; Arabidopsis	.	TRINITY_DN76674_c1_g1_i9.p1	397-891[-]	ATL59_ARATH^ATL59_ARATH^Q:1-116,H:69-181^56%ID^E:1.6e-32^RecName: Full=E3 ubiquitin-protein ligase ATL59;^Eukaryota; Viridiplantae; Streptophyta; Embryophyta; Tracheophyta; Spermatophyta; Magnoliophyta; eudicotyledons; Gunneridae; Pentapetalae; rosids; malvids; Brassicales; Brassicaceae; Camelineae; Arabidopsis	PF13639.5^zf-RING_2^Ring finger domain^28-71^E:1.2e-13`PF17123.4^zf-RING_11^RING-like zinc finger^28-57^E:4.1e-09`PF13923.5^zf-C3HC4_2^Zinc finger, C3HC4 type (RING finger)^28-70^E:6.3e-08`PF12678.6^zf-rbx1^RING-H2 zinc finger domain^29-71^E:5.9e-10`PF13445.5^zf-RING_UBOX^RING-type zinc-finger^29-68^E:6.4e-07`PF00097.24^zf-C3HC4^Zinc finger, C3HC4 type (RING finger)^29-70^E:5e-06	.	.	ENOG41121N2^zinc ion binding	KEGG:ath:AT4G10160`KO:K19039	GO:0016021^cellular_component^integral component of membrane`GO:0046872^molecular_function^metal ion binding`GO:0004842^molecular_function^ubiquitin-protein transferase activity`GO:0016567^biological_process^protein ubiquitination	GO:0008270^molecular_function^zinc ion binding`GO:0046872^molecular_function^metal ion binding	.	.
TRINITY_DN76674_c1_g1	TRINITY_DN76674_c1_g1_i8	ATL59_ARATH^ATL59_ARATH^Q:874-608,H:96-181^52.8%ID^E:5.6e-20^RecName: Full=E3 ubiquitin-protein ligase ATL59;^Eukaryota; Viridiplantae; Streptophyta; Embryophyta; Tracheophyta; Spermatophyta; Magnoliophyta; eudicotyledons; Gunneridae; Pentapetalae; rosids; malvids; Brassicales; Brassicaceae; Camelineae; Arabidopsis	.	TRINITY_DN76674_c1_g1_i8.p1	461-796[-]	ATL59_ARATH^ATL59_ARATH^Q:1-63,H:122-181^46%ID^E:3.5e-07^RecName: Full=E3 ubiquitin-protein ligase ATL59;^Eukaryota; Viridiplantae; Streptophyta; Embryophyta; Tracheophyta; Spermatophyta; Magnoliophyta; eudicotyledons; Gunneridae; Pentapetalae; rosids; malvids; Brassicales; Brassicaceae; Camelineae; Arabidopsis	.	.	.	ENOG41121N2^zinc ion binding	KEGG:ath:AT4G10160`KO:K19039	GO:0016021^cellular_component^integral component of membrane`GO:0046872^molecular_function^metal ion binding`GO:0004842^molecular_function^ubiquitin-protein transferase activity`GO:0016567^biological_process^protein ubiquitination	.	.	.
TRINITY_DN76674_c1_g1	TRINITY_DN76674_c1_g1_i5	ATL59_ARATH^ATL59_ARATH^Q:874-608,H:96-181^52.8%ID^E:5.7e-20^RecName: Full=E3 ubiquitin-protein ligase ATL59;^Eukaryota; Viridiplantae; Streptophyta; Embryophyta; Tracheophyta; Spermatophyta; Magnoliophyta; eudicotyledons; Gunneridae; Pentapetalae; rosids; malvids; Brassicales; Brassicaceae; Camelineae; Arabidopsis	.	TRINITY_DN76674_c1_g1_i5.p1	461-796[-]	ATL59_ARATH^ATL59_ARATH^Q:1-63,H:122-181^46%ID^E:3.5e-07^RecName: Full=E3 ubiquitin-protein ligase ATL59;^Eukaryota; Viridiplantae; Streptophyta; Embryophyta; Tracheophyta; Spermatophyta; Magnoliophyta; eudicotyledons; Gunneridae; Pentapetalae; rosids; malvids; Brassicales; Brassicaceae; Camelineae; Arabidopsis	.	.	.	ENOG41121N2^zinc ion binding	KEGG:ath:AT4G10160`KO:K19039	GO:0016021^cellular_component^integral component of membrane`GO:0046872^molecular_function^metal ion binding`GO:0004842^molecular_function^ubiquitin-protein transferase activity`GO:0016567^biological_process^protein ubiquitination	.	.	.
TRINITY_DN76674_c1_g1	TRINITY_DN76674_c1_g1_i4	ATL59_ARATH^ATL59_ARATH^Q:850-584,H:96-181^52.8%ID^E:6.5e-20^RecName: Full=E3 ubiquitin-protein ligase ATL59;^Eukaryota; Viridiplantae; Streptophyta; Embryophyta; Tracheophyta; Spermatophyta; Magnoliophyta; eudicotyledons; Gunneridae; Pentapetalae; rosids; malvids; Brassicales; Brassicaceae; Camelineae; Arabidopsis	.	TRINITY_DN76674_c1_g1_i4.p1	437-772[-]	ATL59_ARATH^ATL59_ARATH^Q:1-63,H:122-181^46%ID^E:3.5e-07^RecName: Full=E3 ubiquitin-protein ligase ATL59;^Eukaryota; Viridiplantae; Streptophyta; Embryophyta; Tracheophyta; Spermatophyta; Magnoliophyta; eudicotyledons; Gunneridae; Pentapetalae; rosids; malvids; Brassicales; Brassicaceae; Camelineae; Arabidopsis	.	.	.	ENOG41121N2^zinc ion binding	KEGG:ath:AT4G10160`KO:K19039	GO:0016021^cellular_component^integral component of membrane`GO:0046872^molecular_function^metal ion binding`GO:0004842^molecular_function^ubiquitin-protein transferase activity`GO:0016567^biological_process^protein ubiquitination	.	.	.
TRINITY_DN76674_c1_g1	TRINITY_DN76674_c1_g1_i7	ATL59_ARATH^ATL59_ARATH^Q:386-39,H:69-181^56%ID^E:9.4e-33^RecName: Full=E3 ubiquitin-protein ligase ATL59;^Eukaryota; Viridiplantae; Streptophyta; Embryophyta; Tracheophyta; Spermatophyta; Magnoliophyta; eudicotyledons; Gunneridae; Pentapetalae; rosids; malvids; Brassicales; Brassicaceae; Camelineae; Arabidopsis	.	TRINITY_DN76674_c1_g1_i7.p1	3-386[-]	ATL59_ARATH^ATL59_ARATH^Q:1-116,H:69-181^56%ID^E:9.4e-33^RecName: Full=E3 ubiquitin-protein ligase ATL59;^Eukaryota; Viridiplantae; Streptophyta; Embryophyta; Tracheophyta; Spermatophyta; Magnoliophyta; eudicotyledons; Gunneridae; Pentapetalae; rosids; malvids; Brassicales; Brassicaceae; Camelineae; Arabidopsis	PF13639.5^zf-RING_2^Ring finger domain^28-71^E:7e-14`PF17123.4^zf-RING_11^RING-like zinc finger^28-57^E:2.7e-09`PF13923.5^zf-C3HC4_2^Zinc finger, C3HC4 type (RING finger)^28-70^E:3.9e-08`PF12678.6^zf-rbx1^RING-H2 zinc finger domain^29-71^E:3.3e-09`PF13445.5^zf-RING_UBOX^RING-type zinc-finger^29-68^E:4e-07`PF00097.24^zf-C3HC4^Zinc finger, C3HC4 type (RING finger)^29-70^E:3.1e-06	.	.	ENOG41121N2^zinc ion binding	KEGG:ath:AT4G10160`KO:K19039	GO:0016021^cellular_component^integral component of membrane`GO:0046872^molecular_function^metal ion binding`GO:0004842^molecular_function^ubiquitin-protein transferase activity`GO:0016567^biological_process^protein ubiquitination	GO:0008270^molecular_function^zinc ion binding`GO:0046872^molecular_function^metal ion binding	.	.
TRINITY_DN76674_c1_g1	TRINITY_DN76674_c1_g1_i6	ATL59_ARATH^ATL59_ARATH^Q:931-584,H:69-181^56%ID^E:3e-32^RecName: Full=E3 ubiquitin-protein ligase ATL59;^Eukaryota; Viridiplantae; Streptophyta; Embryophyta; Tracheophyta; Spermatophyta; Magnoliophyta; eudicotyledons; Gunneridae; Pentapetalae; rosids; malvids; Brassicales; Brassicaceae; Camelineae; Arabidopsis	.	TRINITY_DN76674_c1_g1_i6.p1	437-931[-]	ATL59_ARATH^ATL59_ARATH^Q:1-116,H:69-181^56%ID^E:1.6e-32^RecName: Full=E3 ubiquitin-protein ligase ATL59;^Eukaryota; Viridiplantae; Streptophyta; Embryophyta; Tracheophyta; Spermatophyta; Magnoliophyta; eudicotyledons; Gunneridae; Pentapetalae; rosids; malvids; Brassicales; Brassicaceae; Camelineae; Arabidopsis	PF13639.5^zf-RING_2^Ring finger domain^28-71^E:1.2e-13`PF17123.4^zf-RING_11^RING-like zinc finger^28-57^E:4.1e-09`PF13923.5^zf-C3HC4_2^Zinc finger, C3HC4 type (RING finger)^28-70^E:6.3e-08`PF12678.6^zf-rbx1^RING-H2 zinc finger domain^29-71^E:5.9e-10`PF13445.5^zf-RING_UBOX^RING-type zinc-finger^29-68^E:6.4e-07`PF00097.24^zf-C3HC4^Zinc finger, C3HC4 type (RING finger)^29-70^E:5e-06	.	.	ENOG41121N2^zinc ion binding	KEGG:ath:AT4G10160`KO:K19039	GO:0016021^cellular_component^integral component of membrane`GO:0046872^molecular_function^metal ion binding`GO:0004842^molecular_function^ubiquitin-protein transferase activity`GO:0016567^biological_process^protein ubiquitination	GO:0008270^molecular_function^zinc ion binding`GO:0046872^molecular_function^metal ion binding	.	.
TRINITY_DN76674_c1_g1	TRINITY_DN76674_c1_g1_i1	ATL59_ARATH^ATL59_ARATH^Q:1302-1036,H:96-181^52.8%ID^E:3.4e-20^RecName: Full=E3 ubiquitin-protein ligase ATL59;^Eukaryota; Viridiplantae; Streptophyta; Embryophyta; Tracheophyta; Spermatophyta; Magnoliophyta; eudicotyledons; Gunneridae; Pentapetalae; rosids; malvids; Brassicales; Brassicaceae; Camelineae; Arabidopsis`ATL59_ARATH^ATL59_ARATH^Q:1526-1383,H:52-97^54.2%ID^E:3.3e-07^RecName: Full=E3 u…	.	TRINITY_DN76674_c1_g1_i1.p1	889-1224[-]	ATL59_ARATH^ATL59_ARATH^Q:1-63,H:122-181^46%ID^E:3.5e-07^RecName: Full=E3 ubiquitin-protein ligase ATL59;^Eukaryota; Viridiplantae; Streptophyta; Embryophyta; Tracheophyta; Spermatophyta; Magnoliophyta; eudicotyledons; Gunneridae; Pentapetalae; rosids; malvids; Brassicales; Brassicaceae; Camelineae; Arabidopsis	.	.	.	ENOG41121N2^zinc ion binding	KEGG:ath:AT4G10160`KO:K19039	GO:0016021^cellular_component^integral component of membrane`GO:0046872^molecular_function^metal ion binding`GO:0004842^molecular_function^ubiquitin-protein transferase activity`GO:0016567^biological_process^protein ubiquitination	.	.	.
TRINITY_DN76674_c1_g1	TRINITY_DN76674_c1_g1_i3	ATL59_ARATH^ATL59_ARATH^Q:955-608,H:69-181^56%ID^E:3e-32^RecName: Full=E3 ubiquitin-protein ligase ATL59;^Eukaryota; Viridiplantae; Streptophyta; Embryophyta; Tracheophyta; Spermatophyta; Magnoliophyta; eudicotyledons; Gunneridae; Pentapetalae; rosids; malvids; Brassicales; Brassicaceae; Camelineae; Arabidopsis	.	TRINITY_DN76674_c1_g1_i3.p1	461-955[-]	ATL59_ARATH^ATL59_ARATH^Q:1-116,H:69-181^56%ID^E:1.6e-32^RecName: Full=E3 ubiquitin-protein ligase ATL59;^Eukaryota; Viridiplantae; Streptophyta; Embryophyta; Tracheophyta; Spermatophyta; Magnoliophyta; eudicotyledons; Gunneridae; Pentapetalae; rosids; malvids; Brassicales; Brassicaceae; Camelineae; Arabidopsis	PF13639.5^zf-RING_2^Ring finger domain^28-71^E:1.2e-13`PF17123.4^zf-RING_11^RING-like zinc finger^28-57^E:4.1e-09`PF13923.5^zf-C3HC4_2^Zinc finger, C3HC4 type (RING finger)^28-70^E:6.3e-08`PF12678.6^zf-rbx1^RING-H2 zinc finger domain^29-71^E:5.9e-10`PF13445.5^zf-RING_UBOX^RING-type zinc-finger^29-68^E:6.4e-07`PF00097.24^zf-C3HC4^Zinc finger, C3HC4 type (RING finger)^29-70^E:5e-06	.	.	ENOG41121N2^zinc ion binding	KEGG:ath:AT4G10160`KO:K19039	GO:0016021^cellular_component^integral component of membrane`GO:0046872^molecular_function^metal ion binding`GO:0004842^molecular_function^ubiquitin-protein transferase activity`GO:0016567^biological_process^protein ubiquitination	GO:0008270^molecular_function^zinc ion binding`GO:0046872^molecular_function^metal ion binding	.	.
TRINITY_DN76674_c1_g1	TRINITY_DN76674_c1_g1_i2	ATL59_ARATH^ATL59_ARATH^Q:275-3,H:57-141^47.3%ID^E:2e-16^RecName: Full=E3 ubiquitin-protein ligase ATL59;^Eukaryota; Viridiplantae; Streptophyta; Embryophyta; Tracheophyta; Spermatophyta; Magnoliophyta; eudicotyledons; Gunneridae; Pentapetalae; rosids; malvids; Brassicales; Brassicaceae; Camelineae; Arabidopsis	.	TRINITY_DN76674_c1_g1_i2.p1	3-356[-]	ATL59_ARATH^ATL59_ARATH^Q:28-118,H:57-141^47.3%ID^E:5.1e-17^RecName: Full=E3 ubiquitin-protein ligase ATL59;^Eukaryota; Viridiplantae; Streptophyta; Embryophyta; Tracheophyta; Spermatophyta; Magnoliophyta; eudicotyledons; Gunneridae; Pentapetalae; rosids; malvids; Brassicales; Brassicaceae; Camelineae; Arabidopsis	PF13639.5^zf-RING_2^Ring finger domain^73-116^E:1.5e-12`PF13923.5^zf-C3HC4_2^Zinc finger, C3HC4 type (RING finger)^73-115^E:3.3e-08`PF17123.4^zf-RING_11^RING-like zinc finger^74-102^E:8.3e-09`PF13445.5^zf-RING_UBOX^RING-type zinc-finger^74-113^E:3.4e-07`PF00097.24^zf-C3HC4^Zinc finger, C3HC4 type (RING finger)^74-115^E:2.6e-06`PF12678.6^zf-rbx1^RING-H2 zinc finger domain^87-116^E:7.4e-09	.	.	ENOG41121N2^zinc ion binding	KEGG:ath:AT4G10160`KO:K19039	GO:0016021^cellular_component^integral component of membrane`GO:0046872^molecular_function^metal ion binding`GO:0004842^molecular_function^ubiquitin-protein transferase activity`GO:0016567^biological_process^protein ubiquitination	GO:0046872^molecular_function^metal ion binding`GO:0008270^molecular_function^zinc ion binding	.	.
TRINITY_DN76674_c1_g1	TRINITY_DN76674_c1_g1_i11	ATL59_ARATH^ATL59_ARATH^Q:435-172,H:97-181^53.4%ID^E:2.5e-20^RecName: Full=E3 ubiquitin-protein ligase ATL59;^Eukaryota; Viridiplantae; Streptophyta; Embryophyta; Tracheophyta; Spermatophyta; Magnoliophyta; eudicotyledons; Gunneridae; Pentapetalae; rosids; malvids; Brassicales; Brassicaceae; Camelineae; Arabidopsis	.	TRINITY_DN76674_c1_g1_i11.p1	25-438[-]	ATL59_ARATH^ATL59_ARATH^Q:2-89,H:97-181^53.4%ID^E:2e-20^RecName: Full=E3 ubiquitin-protein ligase ATL59;^Eukaryota; Viridiplantae; Streptophyta; Embryophyta; Tracheophyta; Spermatophyta; Magnoliophyta; eudicotyledons; Gunneridae; Pentapetalae; rosids; malvids; Brassicales; Brassicaceae; Camelineae; Arabidopsis	PF13639.5^zf-RING_2^Ring finger domain^1-44^E:1.3e-13`PF13923.5^zf-C3HC4_2^Zinc finger, C3HC4 type (RING finger)^1-43^E:3.8e-08`PF17123.4^zf-RING_11^RING-like zinc finger^2-30^E:1.1e-08`PF13445.5^zf-RING_UBOX^RING-type zinc-finger^2-41^E:4.6e-07`PF00097.24^zf-C3HC4^Zinc finger, C3HC4 type (RING finger)^2-43^E:3.6e-06`PF12678.6^zf-rbx1^RING-H2 zinc finger domain^15-44^E:4.9e-09	.	.	ENOG41121N2^zinc ion binding	KEGG:ath:AT4G10160`KO:K19039	GO:0016021^cellular_component^integral component of membrane`GO:0046872^molecular_function^metal ion binding`GO:0004842^molecular_function^ubiquitin-protein transferase activity`GO:0016567^biological_process^protein ubiquitination	GO:0046872^molecular_function^metal ion binding`GO:0008270^molecular_function^zinc ion binding	.	.
TRINITY_DN76674_c1_g1	TRINITY_DN76674_c1_g1_i10	ATL59_ARATH^ATL59_ARATH^Q:140-3,H:96-141^73.9%ID^E:3.7e-16^RecName: Full=E3 ubiquitin-protein ligase ATL59;^Eukaryota; Viridiplantae; Streptophyta; Embryophyta; Tracheophyta; Spermatophyta; Magnoliophyta; eudicotyledons; Gunneridae; Pentapetalae; rosids; malvids; Brassicales; Brassicaceae; Camelineae; Arabidopsis	.	TRINITY_DN76674_c1_g1_i10.p1	3-323[-]	ATL59_ARATH^ATL59_ARATH^Q:62-107,H:96-141^73.9%ID^E:1.3e-16^RecName: Full=E3 ubiquitin-protein ligase ATL59;^Eukaryota; Viridiplantae; Streptophyta; Embryophyta; Tracheophyta; Spermatophyta; Magnoliophyta; eudicotyledons; Gunneridae; Pentapetalae; rosids; malvids; Brassicales; Brassicaceae; Camelineae; Arabidopsis	PF13639.5^zf-RING_2^Ring finger domain^62-105^E:1.2e-12`PF13923.5^zf-C3HC4_2^Zinc finger, C3HC4 type (RING finger)^62-104^E:2.6e-08`PF17123.4^zf-RING_11^RING-like zinc finger^63-91^E:6.9e-09`PF13445.5^zf-RING_UBOX^RING-type zinc-finger^63-102^E:2.7e-07`PF00097.24^zf-C3HC4^Zinc finger, C3HC4 type (RING finger)^63-104^E:2.1e-06`PF12678.6^zf-rbx1^RING-H2 zinc finger domain^75-105^E:6.3e-09	.	.	ENOG41121N2^zinc ion binding	KEGG:ath:AT4G10160`KO:K19039	GO:0016021^cellular_component^integral component of membrane`GO:0046872^molecular_function^metal ion binding`GO:0004842^molecular_function^ubiquitin-protein transferase activity`GO:0016567^biological_process^protein ubiquitination	GO:0046872^molecular_function^metal ion binding`GO:0008270^molecular_function^zinc ion binding	.	.
TRINITY_DN76674_c1_g1	TRINITY_DN76674_c1_g1_i13	ATL59_ARATH^ATL59_ARATH^Q:874-608,H:96-181^52.8%ID^E:6.5e-20^RecName: Full=E3 ubiquitin-protein ligase ATL59;^Eukaryota; Viridiplantae; Streptophyta; Embryophyta; Tracheophyta; Spermatophyta; Magnoliophyta; eudicotyledons; Gunneridae; Pentapetalae; rosids; malvids; Brassicales; Brassicaceae; Camelineae; Arabidopsis	.	TRINITY_DN76674_c1_g1_i13.p1	461-796[-]	ATL59_ARATH^ATL59_ARATH^Q:1-63,H:122-181^46%ID^E:3.5e-07^RecName: Full=E3 ubiquitin-protein ligase ATL59;^Eukaryota; Viridiplantae; Streptophyta; Embryophyta; Tracheophyta; Spermatophyta; Magnoliophyta; eudicotyledons; Gunneridae; Pentapetalae; rosids; malvids; Brassicales; Brassicaceae; Camelineae; Arabidopsis	.	.	.	ENOG41121N2^zinc ion binding	KEGG:ath:AT4G10160`KO:K19039	GO:0016021^cellular_component^integral component of membrane`GO:0046872^molecular_function^metal ion binding`GO:0004842^molecular_function^ubiquitin-protein transferase activity`GO:0016567^biological_process^protein ubiquitination	.	.	.
TRINITY_DN76674_c1_g1	TRINITY_DN76674_c1_g1_i12	ATL59_ARATH^ATL59_ARATH^Q:885-619,H:96-181^52.8%ID^E:2.5e-20^RecName: Full=E3 ubiquitin-protein ligase ATL59;^Eukaryota; Viridiplantae; Streptophyta; Embryophyta; Tracheophyta; Spermatophyta; Magnoliophyta; eudicotyledons; Gunneridae; Pentapetalae; rosids; malvids; Brassicales; Brassicaceae; Camelineae; Arabidopsis`ATL59_ARATH^ATL59_ARATH^Q:1109-966,H:52-97^54.2%ID^E:2.4e-07^RecName: Full=E3 ubiq…	.	TRINITY_DN76674_c1_g1_i12.p1	472-807[-]	ATL59_ARATH^ATL59_ARATH^Q:1-63,H:122-181^46%ID^E:3.5e-07^RecName: Full=E3 ubiquitin-protein ligase ATL59;^Eukaryota; Viridiplantae; Streptophyta; Embryophyta; Tracheophyta; Spermatophyta; Magnoliophyta; eudicotyledons; Gunneridae; Pentapetalae; rosids; malvids; Brassicales; Brassicaceae; Camelineae; Arabidopsis	.	.	.	ENOG41121N2^zinc ion binding	KEGG:ath:AT4G10160`KO:K19039	GO:0016021^cellular_component^integral component of membrane`GO:0046872^molecular_function^metal ion binding`GO:0004842^molecular_function^ubiquitin-protein transferase activity`GO:0016567^biological_process^protein ubiquitination	.	.	.
TRINITY_DN76716_c2_g2	TRINITY_DN76716_c2_g2_i3	THI42_VITVI^THI42_VITVI^Q:958-1458,H:134-300^96.4%ID^E:7e-85^RecName: Full=Thiamine thiazole synthase 2, chloroplastic {ECO:0000255|HAMAP-Rule:MF_03158};^Eukaryota; Viridiplantae; Streptophyta; Embryophyta; Tracheophyta; Spermatophyta; Magnoliophyta; eudicotyledons; Gunneridae; Pentapetalae; rosids; Vitales; Vitaceae; Vitis`THI42_VITVI^THI42_VITVI^Q:1976-2125,H:301-355^70.9%ID^E:1e-11^RecName: Fu…	.	TRINITY_DN76716_c2_g2_i3.p1	1078-1647[+]	THI42_VITVI^THI42_VITVI^Q:1-127,H:174-300^98.4%ID^E:4.7e-65^RecName: Full=Thiamine thiazole synthase 2, chloroplastic {ECO:0000255|HAMAP-Rule:MF_03158};^Eukaryota; Viridiplantae; Streptophyta; Embryophyta; Tracheophyta; Spermatophyta; Magnoliophyta; eudicotyledons; Gunneridae; Pentapetalae; rosids; Vitales; Vitaceae; Vitis	PF01946.16^Thi4^Thi4 family^1-130^E:3.2e-56	.	ExpAA=23.35^PredHel=1^Topology=o131-153i	COG1635^Involved in biosynthesis of the thiamine precursor thiazole. Catalyzes the conversion of NAD and glycine to adenosine diphosphate 5-(2-hydroxyethyl)-4-methylthiazole-2-carboxylic acid (ADT), an adenylated thiazole intermediate. The reaction includes an iron-dependent sulfide transfer from a conserved cysteine residue of the protein to a thiazole intermediate. The enzyme can only undergo a…	KEGG:vvi:100265774`KO:K03146	GO:0009507^cellular_component^chloroplast`GO:0005829^cellular_component^cytosol`GO:0005506^molecular_function^iron ion binding`GO:0006950^biological_process^response to stress`GO:0009228^biological_process^thiamine biosynthetic process`GO:0052837^biological_process^thiazole biosynthetic process	.	.	.
TRINITY_DN76716_c2_g2	TRINITY_DN76716_c2_g2_i1	THI4_CITSI^THI4_CITSI^Q:385-1233,H:23-303^89.1%ID^E:3.2e-137^RecName: Full=Thiamine thiazole synthase, chloroplastic {ECO:0000255|HAMAP-Rule:MF_03158};^Eukaryota; Viridiplantae; Streptophyta; Embryophyta; Tracheophyta; Spermatophyta; Magnoliophyta; eudicotyledons; Gunneridae; Pentapetalae; rosids; malvids; Sapindales; Rutaceae; Aurantioideae; Citrus`THI4_CITSI^THI4_CITSI^Q:1751-1900,H:304-356^79.…	.	TRINITY_DN76716_c2_g2_i1.p1	325-1422[+]	THI4_ALNGL^THI4_ALNGL^Q:4-303,H:1-299^88.8%ID^E:4.2e-142^RecName: Full=Thiamine thiazole synthase, chloroplastic {ECO:0000255|HAMAP-Rule:MF_03158};^Eukaryota; Viridiplantae; Streptophyta; Embryophyta; Tracheophyta; Spermatophyta; Magnoliophyta; eudicotyledons; Gunneridae; Pentapetalae; rosids; fabids; Fagales; Betulaceae; Alnus	PF01946.16^Thi4^Thi4 family^74-306^E:8.6e-112`PF01266.23^DAO^FAD dependent oxidoreductase^92-141^E:2.4e-08`PF00890.23^FAD_binding_2^FAD binding domain^92-128^E:1.3e-06`PF13450.5^NAD_binding_8^NAD(P)-binding Rossmann-like domain^95-150^E:2.6e-07	.	ExpAA=23.20^PredHel=1^Topology=o307-329i	.	.	GO:0009507^cellular_component^chloroplast`GO:0046872^molecular_function^metal ion binding`GO:0006950^biological_process^response to stress`GO:0009228^biological_process^thiamine biosynthetic process	GO:0016491^molecular_function^oxidoreductase activity`GO:0055114^biological_process^oxidation-reduction process	.	.
TRINITY_DN76716_c2_g2	TRINITY_DN76716_c2_g2_i5	THI4_ALNGL^THI4_ALNGL^Q:382-1383,H:19-352^89.3%ID^E:3.3e-160^RecName: Full=Thiamine thiazole synthase, chloroplastic {ECO:0000255|HAMAP-Rule:MF_03158};^Eukaryota; Viridiplantae; Streptophyta; Embryophyta; Tracheophyta; Spermatophyta; Magnoliophyta; eudicotyledons; Gunneridae; Pentapetalae; rosids; fabids; Fagales; Betulaceae; Alnus	.	TRINITY_DN76716_c2_g2_i5.p1	325-1386[+]	THI4_ALNGL^THI4_ALNGL^Q:4-353,H:1-352^88.5%ID^E:3.4e-165^RecName: Full=Thiamine thiazole synthase, chloroplastic {ECO:0000255|HAMAP-Rule:MF_03158};^Eukaryota; Viridiplantae; Streptophyta; Embryophyta; Tracheophyta; Spermatophyta; Magnoliophyta; eudicotyledons; Gunneridae; Pentapetalae; rosids; fabids; Fagales; Betulaceae; Alnus	PF01946.16^Thi4^Thi4 family^74-307^E:8.7e-115`PF01266.23^DAO^FAD dependent oxidoreductase^92-141^E:2.3e-08`PF00890.23^FAD_binding_2^FAD binding domain^92-128^E:1.2e-06`PF13450.5^NAD_binding_8^NAD(P)-binding Rossmann-like domain^95-150^E:2.5e-07	.	.	.	.	GO:0009507^cellular_component^chloroplast`GO:0046872^molecular_function^metal ion binding`GO:0006950^biological_process^response to stress`GO:0009228^biological_process^thiamine biosynthetic process	GO:0016491^molecular_function^oxidoreductase activity`GO:0055114^biological_process^oxidation-reduction process	.	.
TRINITY_DN76716_c2_g2	TRINITY_DN76716_c2_g2_i4	THI4_CITSI^THI4_CITSI^Q:385-780,H:23-153^77.6%ID^E:2.5e-46^RecName: Full=Thiamine thiazole synthase, chloroplastic {ECO:0000255|HAMAP-Rule:MF_03158};^Eukaryota; Viridiplantae; Streptophyta; Embryophyta; Tracheophyta; Spermatophyta; Magnoliophyta; eudicotyledons; Gunneridae; Pentapetalae; rosids; malvids; Sapindales; Rutaceae; Aurantioideae; Citrus`THI4_CITSI^THI4_CITSI^Q:1704-1874,H:137-193^91.2%…	.	TRINITY_DN76716_c2_g2_i4.p1	325-792[+]	THI4_ALNGL^THI4_ALNGL^Q:4-152,H:1-149^76.5%ID^E:7.1e-51^RecName: Full=Thiamine thiazole synthase, chloroplastic {ECO:0000255|HAMAP-Rule:MF_03158};^Eukaryota; Viridiplantae; Streptophyta; Embryophyta; Tracheophyta; Spermatophyta; Magnoliophyta; eudicotyledons; Gunneridae; Pentapetalae; rosids; fabids; Fagales; Betulaceae; Alnus	PF01946.16^Thi4^Thi4 family^74-147^E:9.7e-32`PF01266.23^DAO^FAD dependent oxidoreductase^92-141^E:6.4e-09`PF00890.23^FAD_binding_2^FAD binding domain^92-131^E:1.9e-07`PF13450.5^NAD_binding_8^NAD(P)-binding Rossmann-like domain^95-128^E:2.1e-07	.	.	.	.	GO:0009507^cellular_component^chloroplast`GO:0046872^molecular_function^metal ion binding`GO:0006950^biological_process^response to stress`GO:0009228^biological_process^thiamine biosynthetic process	GO:0016491^molecular_function^oxidoreductase activity`GO:0055114^biological_process^oxidation-reduction process	.	.
TRINITY_DN76753_c1_g3	TRINITY_DN76753_c1_g3_i3	MD33A_ARATH^MD33A_ARATH^Q:1-111,H:54-90^67.6%ID^E:4.3e-07^RecName: Full=Mediator of RNA polymerase II transcription subunit 33A;^Eukaryota; Viridiplantae; Streptophyta; Embryophyta; Tracheophyta; Spermatophyta; Magnoliophyta; eudicotyledons; Gunneridae; Pentapetalae; rosids; malvids; Brassicales; Brassicaceae; Camelineae; Arabidopsis	.	.	.	.	.	.	.	ENOG410XPER^Component of the Mediator complex, a coactivator involved in the regulated transcription of nearly all RNA polymerase II-dependent genes. Mediator functions as a bridge to convey information from gene-specific regulatory proteins to the basal RNA polymerase II transcription machinery. The Mediator complex, having a compact conformation in its free form, is recruited to promoters by di…	KEGG:ath:AT3G23590	GO:0016592^cellular_component^mediator complex`GO:0009698^biological_process^phenylpropanoid metabolic process`GO:2000762^biological_process^regulation of phenylpropanoid metabolic process`GO:0006355^biological_process^regulation of transcription, DNA-templated`GO:0006351^biological_process^transcription, DNA-templated	.	.	.
TRINITY_DN76753_c1_g3	TRINITY_DN76753_c1_g3_i2	.	.	TRINITY_DN76753_c1_g3_i2.p1	159-485[-]	.	.	.	.	.	.	.	.	.	.
TRINITY_DN76753_c1_g2	TRINITY_DN76753_c1_g2_i10	MD33A_ARATH^MD33A_ARATH^Q:1116-4,H:391-745^68.7%ID^E:1.8e-145^RecName: Full=Mediator of RNA polymerase II transcription subunit 33A;^Eukaryota; Viridiplantae; Streptophyta; Embryophyta; Tracheophyta; Spermatophyta; Magnoliophyta; eudicotyledons; Gunneridae; Pentapetalae; rosids; malvids; Brassicales; Brassicaceae; Camelineae; Arabidopsis	.	TRINITY_DN76753_c1_g2_i10.p1	1-1116[-]	MD33A_ARATH^MD33A_ARATH^Q:1-372,H:391-746^68.8%ID^E:4.8e-146^RecName: Full=Mediator of RNA polymerase II transcription subunit 33A;^Eukaryota; Viridiplantae; Streptophyta; Embryophyta; Tracheophyta; Spermatophyta; Magnoliophyta; eudicotyledons; Gunneridae; Pentapetalae; rosids; malvids; Brassicales; Brassicaceae; Camelineae; Arabidopsis	.	sigP:1^19^0.822^YES	.	ENOG410XPER^Component of the Mediator complex, a coactivator involved in the regulated transcription of nearly all RNA polymerase II-dependent genes. Mediator functions as a bridge to convey information from gene-specific regulatory proteins to the basal RNA polymerase II transcription machinery. The Mediator complex, having a compact conformation in its free form, is recruited to promoters by di…	KEGG:ath:AT3G23590	GO:0016592^cellular_component^mediator complex`GO:0009698^biological_process^phenylpropanoid metabolic process`GO:2000762^biological_process^regulation of phenylpropanoid metabolic process`GO:0006355^biological_process^regulation of transcription, DNA-templated`GO:0006351^biological_process^transcription, DNA-templated	.	.	.
TRINITY_DN76753_c1_g2	TRINITY_DN76753_c1_g2_i11	MD33A_ARATH^MD33A_ARATH^Q:573-1,H:556-746^77%ID^E:6e-82^RecName: Full=Mediator of RNA polymerase II transcription subunit 33A;^Eukaryota; Viridiplantae; Streptophyta; Embryophyta; Tracheophyta; Spermatophyta; Magnoliophyta; eudicotyledons; Gunneridae; Pentapetalae; rosids; malvids; Brassicales; Brassicaceae; Camelineae; Arabidopsis`MD33A_ARATH^MD33A_ARATH^Q:1780-1238,H:391-555^60.2%ID^E:9.6e-56^R…	.	TRINITY_DN76753_c1_g2_i11.p1	1208-1780[-]	MD33A_ARATH^MD33A_ARATH^Q:1-181,H:391-555^60.2%ID^E:4.1e-56^RecName: Full=Mediator of RNA polymerase II transcription subunit 33A;^Eukaryota; Viridiplantae; Streptophyta; Embryophyta; Tracheophyta; Spermatophyta; Magnoliophyta; eudicotyledons; Gunneridae; Pentapetalae; rosids; malvids; Brassicales; Brassicaceae; Camelineae; Arabidopsis	.	sigP:1^19^0.822^YES	.	ENOG410XPER^Component of the Mediator complex, a coactivator involved in the regulated transcription of nearly all RNA polymerase II-dependent genes. Mediator functions as a bridge to convey information from gene-specific regulatory proteins to the basal RNA polymerase II transcription machinery. The Mediator complex, having a compact conformation in its free form, is recruited to promoters by di…	KEGG:ath:AT3G23590	GO:0016592^cellular_component^mediator complex`GO:0009698^biological_process^phenylpropanoid metabolic process`GO:2000762^biological_process^regulation of phenylpropanoid metabolic process`GO:0006355^biological_process^regulation of transcription, DNA-templated`GO:0006351^biological_process^transcription, DNA-templated	.	.	.
TRINITY_DN76753_c1_g2	TRINITY_DN76753_c1_g2_i8	MD33A_ARATH^MD33A_ARATH^Q:975-2126,H:1-383^58.6%ID^E:5.3e-122^RecName: Full=Mediator of RNA polymerase II transcription subunit 33A;^Eukaryota; Viridiplantae; Streptophyta; Embryophyta; Tracheophyta; Spermatophyta; Magnoliophyta; eudicotyledons; Gunneridae; Pentapetalae; rosids; malvids; Brassicales; Brassicaceae; Camelineae; Arabidopsis`MD33A_ARATH^MD33A_ARATH^Q:321-1,H:640-746^70.1%ID^E:8.9e-37…	.	TRINITY_DN76753_c1_g2_i8.p1	975-2168[+]	MD33A_ARATH^MD33A_ARATH^Q:1-384,H:1-383^58.6%ID^E:4e-122^RecName: Full=Mediator of RNA polymerase II transcription subunit 33A;^Eukaryota; Viridiplantae; Streptophyta; Embryophyta; Tracheophyta; Spermatophyta; Magnoliophyta; eudicotyledons; Gunneridae; Pentapetalae; rosids; malvids; Brassicales; Brassicaceae; Camelineae; Arabidopsis	.	.	.	ENOG410XPER^Component of the Mediator complex, a coactivator involved in the regulated transcription of nearly all RNA polymerase II-dependent genes. Mediator functions as a bridge to convey information from gene-specific regulatory proteins to the basal RNA polymerase II transcription machinery. The Mediator complex, having a compact conformation in its free form, is recruited to promoters by di…	KEGG:ath:AT3G23590	GO:0016592^cellular_component^mediator complex`GO:0009698^biological_process^phenylpropanoid metabolic process`GO:2000762^biological_process^regulation of phenylpropanoid metabolic process`GO:0006355^biological_process^regulation of transcription, DNA-templated`GO:0006351^biological_process^transcription, DNA-templated	.	.	.
TRINITY_DN76753_c1_g2	TRINITY_DN76753_c1_g2_i9	MD33A_ARATH^MD33A_ARATH^Q:975-2126,H:1-383^58.6%ID^E:3.8e-122^RecName: Full=Mediator of RNA polymerase II transcription subunit 33A;^Eukaryota; Viridiplantae; Streptophyta; Embryophyta; Tracheophyta; Spermatophyta; Magnoliophyta; eudicotyledons; Gunneridae; Pentapetalae; rosids; malvids; Brassicales; Brassicaceae; Camelineae; Arabidopsis`MD33A_ARATH^MD33A_ARATH^Q:321-1,H:640-746^70.1%ID^E:8.5e-37…	.	TRINITY_DN76753_c1_g2_i9.p1	975-2216[+]	MD33A_ARATH^MD33A_ARATH^Q:1-384,H:1-383^58.6%ID^E:4.1e-122^RecName: Full=Mediator of RNA polymerase II transcription subunit 33A;^Eukaryota; Viridiplantae; Streptophyta; Embryophyta; Tracheophyta; Spermatophyta; Magnoliophyta; eudicotyledons; Gunneridae; Pentapetalae; rosids; malvids; Brassicales; Brassicaceae; Camelineae; Arabidopsis	.	.	.	ENOG410XPER^Component of the Mediator complex, a coactivator involved in the regulated transcription of nearly all RNA polymerase II-dependent genes. Mediator functions as a bridge to convey information from gene-specific regulatory proteins to the basal RNA polymerase II transcription machinery. The Mediator complex, having a compact conformation in its free form, is recruited to promoters by di…	KEGG:ath:AT3G23590	GO:0016592^cellular_component^mediator complex`GO:0009698^biological_process^phenylpropanoid metabolic process`GO:2000762^biological_process^regulation of phenylpropanoid metabolic process`GO:0006355^biological_process^regulation of transcription, DNA-templated`GO:0006351^biological_process^transcription, DNA-templated	.	.	.
TRINITY_DN76753_c1_g2	TRINITY_DN76753_c1_g2_i1	MD33A_ARATH^MD33A_ARATH^Q:287-1018,H:1-243^55.7%ID^E:1.2e-71^RecName: Full=Mediator of RNA polymerase II transcription subunit 33A;^Eukaryota; Viridiplantae; Streptophyta; Embryophyta; Tracheophyta; Spermatophyta; Magnoliophyta; eudicotyledons; Gunneridae; Pentapetalae; rosids; malvids; Brassicales; Brassicaceae; Camelineae; Arabidopsis	.	TRINITY_DN76753_c1_g2_i1.p1	287-1021[+]	MD33A_ARATH^MD33A_ARATH^Q:1-244,H:1-243^55.7%ID^E:2e-71^RecName: Full=Mediator of RNA polymerase II transcription subunit 33A;^Eukaryota; Viridiplantae; Streptophyta; Embryophyta; Tracheophyta; Spermatophyta; Magnoliophyta; eudicotyledons; Gunneridae; Pentapetalae; rosids; malvids; Brassicales; Brassicaceae; Camelineae; Arabidopsis	.	.	.	ENOG410XPER^Component of the Mediator complex, a coactivator involved in the regulated transcription of nearly all RNA polymerase II-dependent genes. Mediator functions as a bridge to convey information from gene-specific regulatory proteins to the basal RNA polymerase II transcription machinery. The Mediator complex, having a compact conformation in its free form, is recruited to promoters by di…	KEGG:ath:AT3G23590	GO:0016592^cellular_component^mediator complex`GO:0009698^biological_process^phenylpropanoid metabolic process`GO:2000762^biological_process^regulation of phenylpropanoid metabolic process`GO:0006355^biological_process^regulation of transcription, DNA-templated`GO:0006351^biological_process^transcription, DNA-templated	.	.	.
TRINITY_DN76753_c1_g2	TRINITY_DN76753_c1_g2_i2	MD33A_ARATH^MD33A_ARATH^Q:818-276,H:391-555^60.2%ID^E:4.4e-56^RecName: Full=Mediator of RNA polymerase II transcription subunit 33A;^Eukaryota; Viridiplantae; Streptophyta; Embryophyta; Tracheophyta; Spermatophyta; Magnoliophyta; eudicotyledons; Gunneridae; Pentapetalae; rosids; malvids; Brassicales; Brassicaceae; Camelineae; Arabidopsis	.	TRINITY_DN76753_c1_g2_i2.p1	246-818[-]	MD33A_ARATH^MD33A_ARATH^Q:1-181,H:391-555^60.2%ID^E:4.1e-56^RecName: Full=Mediator of RNA polymerase II transcription subunit 33A;^Eukaryota; Viridiplantae; Streptophyta; Embryophyta; Tracheophyta; Spermatophyta; Magnoliophyta; eudicotyledons; Gunneridae; Pentapetalae; rosids; malvids; Brassicales; Brassicaceae; Camelineae; Arabidopsis	.	sigP:1^19^0.822^YES	.	ENOG410XPER^Component of the Mediator complex, a coactivator involved in the regulated transcription of nearly all RNA polymerase II-dependent genes. Mediator functions as a bridge to convey information from gene-specific regulatory proteins to the basal RNA polymerase II transcription machinery. The Mediator complex, having a compact conformation in its free form, is recruited to promoters by di…	KEGG:ath:AT3G23590	GO:0016592^cellular_component^mediator complex`GO:0009698^biological_process^phenylpropanoid metabolic process`GO:2000762^biological_process^regulation of phenylpropanoid metabolic process`GO:0006355^biological_process^regulation of transcription, DNA-templated`GO:0006351^biological_process^transcription, DNA-templated	.	.	.
TRINITY_DN76753_c1_g2	TRINITY_DN76753_c1_g2_i3	MD33A_ARATH^MD33A_ARATH^Q:225-956,H:1-243^55.7%ID^E:1.6e-71^RecName: Full=Mediator of RNA polymerase II transcription subunit 33A;^Eukaryota; Viridiplantae; Streptophyta; Embryophyta; Tracheophyta; Spermatophyta; Magnoliophyta; eudicotyledons; Gunneridae; Pentapetalae; rosids; malvids; Brassicales; Brassicaceae; Camelineae; Arabidopsis`MD33A_ARATH^MD33A_ARATH^Q:1322-1735,H:244-381^64.5%ID^E:2.7e-…	.	TRINITY_DN76753_c1_g2_i3.p1	225-1076[+]	MD33A_ARATH^MD33A_ARATH^Q:1-244,H:1-243^55.7%ID^E:1.3e-71^RecName: Full=Mediator of RNA polymerase II transcription subunit 33A;^Eukaryota; Viridiplantae; Streptophyta; Embryophyta; Tracheophyta; Spermatophyta; Magnoliophyta; eudicotyledons; Gunneridae; Pentapetalae; rosids; malvids; Brassicales; Brassicaceae; Camelineae; Arabidopsis	.	.	.	ENOG410XPER^Component of the Mediator complex, a coactivator involved in the regulated transcription of nearly all RNA polymerase II-dependent genes. Mediator functions as a bridge to convey information from gene-specific regulatory proteins to the basal RNA polymerase II transcription machinery. The Mediator complex, having a compact conformation in its free form, is recruited to promoters by di…	KEGG:ath:AT3G23590	GO:0016592^cellular_component^mediator complex`GO:0009698^biological_process^phenylpropanoid metabolic process`GO:2000762^biological_process^regulation of phenylpropanoid metabolic process`GO:0006355^biological_process^regulation of transcription, DNA-templated`GO:0006351^biological_process^transcription, DNA-templated	.	.	.
TRINITY_DN76753_c1_g2	TRINITY_DN76753_c1_g2_i4	MD33B_ARATH^MD33B_ARATH^Q:661-323,H:360-470^55.8%ID^E:7e-28^RecName: Full=Mediator of RNA polymerase II transcription subunit 33B;^Eukaryota; Viridiplantae; Streptophyta; Embryophyta; Tracheophyta; Spermatophyta; Magnoliophyta; eudicotyledons; Gunneridae; Pentapetalae; rosids; malvids; Brassicales; Brassicaceae; Camelineae; Arabidopsis	.	TRINITY_DN76753_c1_g2_i4.p1	320-661[-]	MD33B_ARATH^MD33B_ARATH^Q:1-113,H:360-470^55.8%ID^E:2.8e-28^RecName: Full=Mediator of RNA polymerase II transcription subunit 33B;^Eukaryota; Viridiplantae; Streptophyta; Embryophyta; Tracheophyta; Spermatophyta; Magnoliophyta; eudicotyledons; Gunneridae; Pentapetalae; rosids; malvids; Brassicales; Brassicaceae; Camelineae; Arabidopsis	.	sigP:1^19^0.822^YES	.	ENOG410XPER^Component of the Mediator complex, a coactivator involved in the regulated transcription of nearly all RNA polymerase II-dependent genes. Mediator functions as a bridge to convey information from gene-specific regulatory proteins to the basal RNA polymerase II transcription machinery. The Mediator complex, having a compact conformation in its free form, is recruited to promoters by di…	KEGG:ath:AT2G48110	GO:0016592^cellular_component^mediator complex`GO:0016020^cellular_component^membrane`GO:0009698^biological_process^phenylpropanoid metabolic process`GO:2000762^biological_process^regulation of phenylpropanoid metabolic process`GO:0006355^biological_process^regulation of transcription, DNA-templated`GO:0006351^biological_process^transcription, DNA-templated	.	.	.
TRINITY_DN76753_c1_g2	TRINITY_DN76753_c1_g2_i5	MD33A_ARATH^MD33A_ARATH^Q:225-1421,H:1-398^60.2%ID^E:3.5e-133^RecName: Full=Mediator of RNA polymerase II transcription subunit 33A;^Eukaryota; Viridiplantae; Streptophyta; Embryophyta; Tracheophyta; Spermatophyta; Magnoliophyta; eudicotyledons; Gunneridae; Pentapetalae; rosids; malvids; Brassicales; Brassicaceae; Camelineae; Arabidopsis	.	TRINITY_DN76753_c1_g2_i5.p1	225-1421[+]	MD33A_ARATH^MD33A_ARATH^Q:1-399,H:1-398^60.2%ID^E:6.6e-133^RecName: Full=Mediator of RNA polymerase II transcription subunit 33A;^Eukaryota; Viridiplantae; Streptophyta; Embryophyta; Tracheophyta; Spermatophyta; Magnoliophyta; eudicotyledons; Gunneridae; Pentapetalae; rosids; malvids; Brassicales; Brassicaceae; Camelineae; Arabidopsis	.	.	.	ENOG410XPER^Component of the Mediator complex, a coactivator involved in the regulated transcription of nearly all RNA polymerase II-dependent genes. Mediator functions as a bridge to convey information from gene-specific regulatory proteins to the basal RNA polymerase II transcription machinery. The Mediator complex, having a compact conformation in its free form, is recruited to promoters by di…	KEGG:ath:AT3G23590	GO:0016592^cellular_component^mediator complex`GO:0009698^biological_process^phenylpropanoid metabolic process`GO:2000762^biological_process^regulation of phenylpropanoid metabolic process`GO:0006355^biological_process^regulation of transcription, DNA-templated`GO:0006351^biological_process^transcription, DNA-templated	.	.	.
TRINITY_DN76753_c1_g2	TRINITY_DN76753_c1_g2_i6	MD33A_ARATH^MD33A_ARATH^Q:462-1,H:593-746^74%ID^E:2.3e-62^RecName: Full=Mediator of RNA polymerase II transcription subunit 33A;^Eukaryota; Viridiplantae; Streptophyta; Embryophyta; Tracheophyta; Spermatophyta; Magnoliophyta; eudicotyledons; Gunneridae; Pentapetalae; rosids; malvids; Brassicales; Brassicaceae; Camelineae; Arabidopsis`MD33A_ARATH^MD33A_ARATH^Q:763-647,H:556-594^87.2%ID^E:8.1e-12^R…	.	TRINITY_DN76753_c1_g2_i6.p1	1-462[-]	MD33A_ARATH^MD33A_ARATH^Q:1-154,H:593-746^74%ID^E:3.1e-62^RecName: Full=Mediator of RNA polymerase II transcription subunit 33A;^Eukaryota; Viridiplantae; Streptophyta; Embryophyta; Tracheophyta; Spermatophyta; Magnoliophyta; eudicotyledons; Gunneridae; Pentapetalae; rosids; malvids; Brassicales; Brassicaceae; Camelineae; Arabidopsis	.	.	.	ENOG410XPER^Component of the Mediator complex, a coactivator involved in the regulated transcription of nearly all RNA polymerase II-dependent genes. Mediator functions as a bridge to convey information from gene-specific regulatory proteins to the basal RNA polymerase II transcription machinery. The Mediator complex, having a compact conformation in its free form, is recruited to promoters by di…	KEGG:ath:AT3G23590	GO:0016592^cellular_component^mediator complex`GO:0009698^biological_process^phenylpropanoid metabolic process`GO:2000762^biological_process^regulation of phenylpropanoid metabolic process`GO:0006355^biological_process^regulation of transcription, DNA-templated`GO:0006351^biological_process^transcription, DNA-templated	.	.	.
TRINITY_DN76753_c1_g2	TRINITY_DN76753_c1_g2_i7	MD33A_ARATH^MD33A_ARATH^Q:573-1,H:556-746^77%ID^E:4e-82^RecName: Full=Mediator of RNA polymerase II transcription subunit 33A;^Eukaryota; Viridiplantae; Streptophyta; Embryophyta; Tracheophyta; Spermatophyta; Magnoliophyta; eudicotyledons; Gunneridae; Pentapetalae; rosids; malvids; Brassicales; Brassicaceae; Camelineae; Arabidopsis`MD33A_ARATH^MD33A_ARATH^Q:1192-650,H:391-555^60.2%ID^E:6.4e-56^Re…	.	TRINITY_DN76753_c1_g2_i7.p1	623-1192[-]	MD33A_ARATH^MD33A_ARATH^Q:1-181,H:391-555^60.2%ID^E:3.1e-56^RecName: Full=Mediator of RNA polymerase II transcription subunit 33A;^Eukaryota; Viridiplantae; Streptophyta; Embryophyta; Tracheophyta; Spermatophyta; Magnoliophyta; eudicotyledons; Gunneridae; Pentapetalae; rosids; malvids; Brassicales; Brassicaceae; Camelineae; Arabidopsis	.	sigP:1^19^0.822^YES	.	ENOG410XPER^Component of the Mediator complex, a coactivator involved in the regulated transcription of nearly all RNA polymerase II-dependent genes. Mediator functions as a bridge to convey information from gene-specific regulatory proteins to the basal RNA polymerase II transcription machinery. The Mediator complex, having a compact conformation in its free form, is recruited to promoters by di…	KEGG:ath:AT3G23590	GO:0016592^cellular_component^mediator complex`GO:0009698^biological_process^phenylpropanoid metabolic process`GO:2000762^biological_process^regulation of phenylpropanoid metabolic process`GO:0006355^biological_process^regulation of transcription, DNA-templated`GO:0006351^biological_process^transcription, DNA-templated	.	.	.
TRINITY_DN76753_c1_g1	TRINITY_DN76753_c1_g1_i5	MD33A_ARATH^MD33A_ARATH^Q:2-1702,H:739-1305^71%ID^E:4.3e-236^RecName: Full=Mediator of RNA polymerase II transcription subunit 33A;^Eukaryota; Viridiplantae; Streptophyta; Embryophyta; Tracheophyta; Spermatophyta; Magnoliophyta; eudicotyledons; Gunneridae; Pentapetalae; rosids; malvids; Brassicales; Brassicaceae; Camelineae; Arabidopsis	.	TRINITY_DN76753_c1_g1_i5.p1	2-1717[+]	MD33A_ARATH^MD33A_ARATH^Q:1-567,H:739-1305^71%ID^E:4.5e-236^RecName: Full=Mediator of RNA polymerase II transcription subunit 33A;^Eukaryota; Viridiplantae; Streptophyta; Embryophyta; Tracheophyta; Spermatophyta; Magnoliophyta; eudicotyledons; Gunneridae; Pentapetalae; rosids; malvids; Brassicales; Brassicaceae; Camelineae; Arabidopsis	.	.	ExpAA=93.77^PredHel=4^Topology=i398-420o444-466i504-526o546-568i	ENOG410XPER^Component of the Mediator complex, a coactivator involved in the regulated transcription of nearly all RNA polymerase II-dependent genes. Mediator functions as a bridge to convey information from gene-specific regulatory proteins to the basal RNA polymerase II transcription machinery. The Mediator complex, having a compact conformation in its free form, is recruited to promoters by di…	KEGG:ath:AT3G23590	GO:0016592^cellular_component^mediator complex`GO:0009698^biological_process^phenylpropanoid metabolic process`GO:2000762^biological_process^regulation of phenylpropanoid metabolic process`GO:0006355^biological_process^regulation of transcription, DNA-templated`GO:0006351^biological_process^transcription, DNA-templated	.	.	.
TRINITY_DN76753_c1_g1	TRINITY_DN76753_c1_g1_i4	MD33A_ARATH^MD33A_ARATH^Q:2-601,H:739-937^71%ID^E:9e-80^RecName: Full=Mediator of RNA polymerase II transcription subunit 33A;^Eukaryota; Viridiplantae; Streptophyta; Embryophyta; Tracheophyta; Spermatophyta; Magnoliophyta; eudicotyledons; Gunneridae; Pentapetalae; rosids; malvids; Brassicales; Brassicaceae; Camelineae; Arabidopsis	.	TRINITY_DN76753_c1_g1_i4.p1	2-613[+]	MD33A_ARATH^MD33A_ARATH^Q:1-200,H:739-937^71%ID^E:7.3e-80^RecName: Full=Mediator of RNA polymerase II transcription subunit 33A;^Eukaryota; Viridiplantae; Streptophyta; Embryophyta; Tracheophyta; Spermatophyta; Magnoliophyta; eudicotyledons; Gunneridae; Pentapetalae; rosids; malvids; Brassicales; Brassicaceae; Camelineae; Arabidopsis	.	.	.	ENOG410XPER^Component of the Mediator complex, a coactivator involved in the regulated transcription of nearly all RNA polymerase II-dependent genes. Mediator functions as a bridge to convey information from gene-specific regulatory proteins to the basal RNA polymerase II transcription machinery. The Mediator complex, having a compact conformation in its free form, is recruited to promoters by di…	KEGG:ath:AT3G23590	GO:0016592^cellular_component^mediator complex`GO:0009698^biological_process^phenylpropanoid metabolic process`GO:2000762^biological_process^regulation of phenylpropanoid metabolic process`GO:0006355^biological_process^regulation of transcription, DNA-templated`GO:0006351^biological_process^transcription, DNA-templated	.	.	.
TRINITY_DN76753_c1_g1	TRINITY_DN76753_c1_g1_i1	MD33A_ARATH^MD33A_ARATH^Q:696-2009,H:867-1305^73.1%ID^E:3e-185^RecName: Full=Mediator of RNA polymerase II transcription subunit 33A;^Eukaryota; Viridiplantae; Streptophyta; Embryophyta; Tracheophyta; Spermatophyta; Magnoliophyta; eudicotyledons; Gunneridae; Pentapetalae; rosids; malvids; Brassicales; Brassicaceae; Camelineae; Arabidopsis`MD33A_ARATH^MD33A_ARATH^Q:2-394,H:739-868^63.4%ID^E:4.4e-4…	.	TRINITY_DN76753_c1_g1_i1.p1	798-2024[+]	MD33A_ARATH^MD33A_ARATH^Q:1-404,H:901-1305^72.1%ID^E:1.6e-166^RecName: Full=Mediator of RNA polymerase II transcription subunit 33A;^Eukaryota; Viridiplantae; Streptophyta; Embryophyta; Tracheophyta; Spermatophyta; Magnoliophyta; eudicotyledons; Gunneridae; Pentapetalae; rosids; malvids; Brassicales; Brassicaceae; Camelineae; Arabidopsis	.	.	ExpAA=102.25^PredHel=4^Topology=i235-257o281-303i341-363o383-405i	ENOG410XPER^Component of the Mediator complex, a coactivator involved in the regulated transcription of nearly all RNA polymerase II-dependent genes. Mediator functions as a bridge to convey information from gene-specific regulatory proteins to the basal RNA polymerase II transcription machinery. The Mediator complex, having a compact conformation in its free form, is recruited to promoters by di…	KEGG:ath:AT3G23590	GO:0016592^cellular_component^mediator complex`GO:0009698^biological_process^phenylpropanoid metabolic process`GO:2000762^biological_process^regulation of phenylpropanoid metabolic process`GO:0006355^biological_process^regulation of transcription, DNA-templated`GO:0006351^biological_process^transcription, DNA-templated	.	.	.
TRINITY_DN76753_c1_g1	TRINITY_DN76753_c1_g1_i3	MD33A_ARATH^MD33A_ARATH^Q:2-394,H:739-868^63.4%ID^E:2.3e-43^RecName: Full=Mediator of RNA polymerase II transcription subunit 33A;^Eukaryota; Viridiplantae; Streptophyta; Embryophyta; Tracheophyta; Spermatophyta; Magnoliophyta; eudicotyledons; Gunneridae; Pentapetalae; rosids; malvids; Brassicales; Brassicaceae; Camelineae; Arabidopsis`MD33A_ARATH^MD33A_ARATH^Q:696-908,H:867-937^84.5%ID^E:7.2e-29…	.	TRINITY_DN76753_c1_g1_i3.p1	2-397[+]	MD33A_ARATH^MD33A_ARATH^Q:1-131,H:739-868^63.4%ID^E:9.3e-44^RecName: Full=Mediator of RNA polymerase II transcription subunit 33A;^Eukaryota; Viridiplantae; Streptophyta; Embryophyta; Tracheophyta; Spermatophyta; Magnoliophyta; eudicotyledons; Gunneridae; Pentapetalae; rosids; malvids; Brassicales; Brassicaceae; Camelineae; Arabidopsis	.	.	.	ENOG410XPER^Component of the Mediator complex, a coactivator involved in the regulated transcription of nearly all RNA polymerase II-dependent genes. Mediator functions as a bridge to convey information from gene-specific regulatory proteins to the basal RNA polymerase II transcription machinery. The Mediator complex, having a compact conformation in its free form, is recruited to promoters by di…	KEGG:ath:AT3G23590	GO:0016592^cellular_component^mediator complex`GO:0009698^biological_process^phenylpropanoid metabolic process`GO:2000762^biological_process^regulation of phenylpropanoid metabolic process`GO:0006355^biological_process^regulation of transcription, DNA-templated`GO:0006351^biological_process^transcription, DNA-templated	.	.	.
TRINITY_DN76753_c1_g1	TRINITY_DN76753_c1_g1_i2	MD33A_ARATH^MD33A_ARATH^Q:203-1306,H:937-1305^71%ID^E:2.5e-149^RecName: Full=Mediator of RNA polymerase II transcription subunit 33A;^Eukaryota; Viridiplantae; Streptophyta; Embryophyta; Tracheophyta; Spermatophyta; Magnoliophyta; eudicotyledons; Gunneridae; Pentapetalae; rosids; malvids; Brassicales; Brassicaceae; Camelineae; Arabidopsis	.	TRINITY_DN76753_c1_g1_i2.p1	191-1321[+]	MD33A_ARATH^MD33A_ARATH^Q:5-372,H:937-1305^71%ID^E:4.7e-149^RecName: Full=Mediator of RNA polymerase II transcription subunit 33A;^Eukaryota; Viridiplantae; Streptophyta; Embryophyta; Tracheophyta; Spermatophyta; Magnoliophyta; eudicotyledons; Gunneridae; Pentapetalae; rosids; malvids; Brassicales; Brassicaceae; Camelineae; Arabidopsis	.	.	ExpAA=103.71^PredHel=5^Topology=o121-143i203-225o249-271i309-331o351-373i	ENOG410XPER^Component of the Mediator complex, a coactivator involved in the regulated transcription of nearly all RNA polymerase II-dependent genes. Mediator functions as a bridge to convey information from gene-specific regulatory proteins to the basal RNA polymerase II transcription machinery. The Mediator complex, having a compact conformation in its free form, is recruited to promoters by di…	KEGG:ath:AT3G23590	GO:0016592^cellular_component^mediator complex`GO:0009698^biological_process^phenylpropanoid metabolic process`GO:2000762^biological_process^regulation of phenylpropanoid metabolic process`GO:0006355^biological_process^regulation of transcription, DNA-templated`GO:0006351^biological_process^transcription, DNA-templated	.	.	.
TRINITY_DN76753_c1_g5	TRINITY_DN76753_c1_g5_i1	MD33B_ARATH^MD33B_ARATH^Q:160-864,H:12-245^55.7%ID^E:1e-66^RecName: Full=Mediator of RNA polymerase II transcription subunit 33B;^Eukaryota; Viridiplantae; Streptophyta; Embryophyta; Tracheophyta; Spermatophyta; Magnoliophyta; eudicotyledons; Gunneridae; Pentapetalae; rosids; malvids; Brassicales; Brassicaceae; Camelineae; Arabidopsis	.	TRINITY_DN76753_c1_g5_i1.p1	1-891[+]	MD33B_ARATH^MD33B_ARATH^Q:54-288,H:12-245^55.7%ID^E:1e-66^RecName: Full=Mediator of RNA polymerase II transcription subunit 33B;^Eukaryota; Viridiplantae; Streptophyta; Embryophyta; Tracheophyta; Spermatophyta; Magnoliophyta; eudicotyledons; Gunneridae; Pentapetalae; rosids; malvids; Brassicales; Brassicaceae; Camelineae; Arabidopsis	.	.	.	ENOG410XPER^Component of the Mediator complex, a coactivator involved in the regulated transcription of nearly all RNA polymerase II-dependent genes. Mediator functions as a bridge to convey information from gene-specific regulatory proteins to the basal RNA polymerase II transcription machinery. The Mediator complex, having a compact conformation in its free form, is recruited to promoters by di…	KEGG:ath:AT2G48110	GO:0016592^cellular_component^mediator complex`GO:0016020^cellular_component^membrane`GO:0009698^biological_process^phenylpropanoid metabolic process`GO:2000762^biological_process^regulation of phenylpropanoid metabolic process`GO:0006355^biological_process^regulation of transcription, DNA-templated`GO:0006351^biological_process^transcription, DNA-templated	.	.	.
TRINITY_DN76753_c1_g4	TRINITY_DN76753_c1_g4_i4	.	.	TRINITY_DN76753_c1_g4_i4.p1	1-378[+]	.	.	.	ExpAA=18.19^PredHel=1^Topology=i101-123o	.	.	.	.	.	.
TRINITY_DN76753_c1_g4	TRINITY_DN76753_c1_g4_i2	.	.	TRINITY_DN76753_c1_g4_i2.p1	173-622[+]	.	.	sigP:1^25^0.654^YES	.	.	.	.	.	.	.
TRINITY_DN76753_c1_g4	TRINITY_DN76753_c1_g4_i3	.	.	.	.	.	.	.	.	.	.	.	.	.	.
TRINITY_DN76753_c1_g4	TRINITY_DN76753_c1_g4_i1	.	.	TRINITY_DN76753_c1_g4_i1.p1	164-613[+]	.	.	sigP:1^25^0.654^YES	.	.	.	.	.	.	.
TRINITY_DN76791_c0_g1	TRINITY_DN76791_c0_g1_i1	PROT3_ARATH^PROT3_ARATH^Q:290-3,H:21-116^47.9%ID^E:1.5e-19^RecName: Full=Proline transporter 3;^Eukaryota; Viridiplantae; Streptophyta; Embryophyta; Tracheophyta; Spermatophyta; Magnoliophyta; eudicotyledons; Gunneridae; Pentapetalae; rosids; malvids; Brassicales; Brassicaceae; Camelineae; Arabidopsis	.	TRINITY_DN76791_c0_g1_i1.p1	3-383[-]	.	PF01490.17^Aa_trans^Transmembrane amino acid transporter protein^39-127^E:8.3e-11	.	ExpAA=49.36^PredHel=2^Topology=i44-66o70-92i	.	.	.	.	.	.
TRINITY_DN76791_c0_g1	TRINITY_DN76791_c0_g1_i2	PROT3_ARATH^PROT3_ARATH^Q:290-3,H:21-116^47.9%ID^E:1.2e-19^RecName: Full=Proline transporter 3;^Eukaryota; Viridiplantae; Streptophyta; Embryophyta; Tracheophyta; Spermatophyta; Magnoliophyta; eudicotyledons; Gunneridae; Pentapetalae; rosids; malvids; Brassicales; Brassicaceae; Camelineae; Arabidopsis	.	TRINITY_DN76791_c0_g1_i2.p1	3-383[-]	.	PF01490.17^Aa_trans^Transmembrane amino acid transporter protein^39-127^E:8.3e-11	.	ExpAA=49.81^PredHel=2^Topology=i44-66o70-92i	.	.	.	.	.	.
TRINITY_DN76791_c0_g2	TRINITY_DN76791_c0_g2_i1	PROT1_ORYSJ^PROT1_ORYSJ^Q:289-95,H:166-231^47%ID^E:9.6e-06^RecName: Full=Proline transporter 1;^Eukaryota; Viridiplantae; Streptophyta; Embryophyta; Tracheophyta; Spermatophyta; Magnoliophyta; Liliopsida; Poales; Poaceae; BOP clade; Oryzoideae; Oryzeae; Oryzinae; Oryza; Oryza sativa	.	.	.	.	.	.	.	COG0814^amino acid transport	KEGG:osa:4333560	GO:0016021^cellular_component^integral component of membrane`GO:0005886^cellular_component^plasma membrane`GO:0015171^molecular_function^amino acid transmembrane transporter activity`GO:0003333^biological_process^amino acid transmembrane transport	.	.	.
TRINITY_DN76791_c0_g2	TRINITY_DN76791_c0_g2_i3	PROT2_ARATH^PROT2_ARATH^Q:323-15,H:225-328^48.1%ID^E:1.9e-23^RecName: Full=Proline transporter 2;^Eukaryota; Viridiplantae; Streptophyta; Embryophyta; Tracheophyta; Spermatophyta; Magnoliophyta; eudicotyledons; Gunneridae; Pentapetalae; rosids; malvids; Brassicales; Brassicaceae; Camelineae; Arabidopsis`PROT2_ARATH^PROT2_ARATH^Q:688-353,H:133-245^40.7%ID^E:1.4e-15^RecName: Full=Proline transporte…	.	TRINITY_DN76791_c0_g2_i3.p1	344-688[-]	PROT1_ORYSJ^PROT1_ORYSJ^Q:1-112,H:166-278^43.4%ID^E:1.1e-16^RecName: Full=Proline transporter 1;^Eukaryota; Viridiplantae; Streptophyta; Embryophyta; Tracheophyta; Spermatophyta; Magnoliophyta; Liliopsida; Poales; Poaceae; BOP clade; Oryzoideae; Oryzeae; Oryzinae; Oryza; Oryza sativa	PF01490.17^Aa_trans^Transmembrane amino acid transporter protein^1-111^E:1.3e-09	.	ExpAA=64.49^PredHel=3^Topology=i20-42o46-65i86-108o	COG0814^amino acid transport	KEGG:osa:4333560	GO:0016021^cellular_component^integral component of membrane`GO:0005886^cellular_component^plasma membrane`GO:0015171^molecular_function^amino acid transmembrane transporter activity`GO:0003333^biological_process^amino acid transmembrane transport	.	.	.
TRINITY_DN76791_c0_g2	TRINITY_DN76791_c0_g2_i2	PROT2_ARATH^PROT2_ARATH^Q:599-15,H:133-328^45.4%ID^E:2.2e-44^RecName: Full=Proline transporter 2;^Eukaryota; Viridiplantae; Streptophyta; Embryophyta; Tracheophyta; Spermatophyta; Magnoliophyta; eudicotyledons; Gunneridae; Pentapetalae; rosids; malvids; Brassicales; Brassicaceae; Camelineae; Arabidopsis	.	TRINITY_DN76791_c0_g2_i2.p1	3-599[-]	PROT2_ARATH^PROT2_ARATH^Q:1-195,H:133-328^45.4%ID^E:2.2e-44^RecName: Full=Proline transporter 2;^Eukaryota; Viridiplantae; Streptophyta; Embryophyta; Tracheophyta; Spermatophyta; Magnoliophyta; eudicotyledons; Gunneridae; Pentapetalae; rosids; malvids; Brassicales; Brassicaceae; Camelineae; Arabidopsis	PF01490.17^Aa_trans^Transmembrane amino acid transporter protein^1-195^E:2e-28	.	ExpAA=103.04^PredHel=4^Topology=i20-42o46-65i86-108o123-145i	COG0814^amino acid transport	KEGG:ath:AT3G55740	GO:0016021^cellular_component^integral component of membrane`GO:0005886^cellular_component^plasma membrane`GO:0015193^molecular_function^L-proline transmembrane transporter activity`GO:0015824^biological_process^proline transport	.	.	.
TRINITY_DN76791_c0_g2	TRINITY_DN76791_c0_g2_i4	PROT1_ORYSJ^PROT1_ORYSJ^Q:450-1,H:166-274^31.8%ID^E:6.5e-09^RecName: Full=Proline transporter 1;^Eukaryota; Viridiplantae; Streptophyta; Embryophyta; Tracheophyta; Spermatophyta; Magnoliophyta; Liliopsida; Poales; Poaceae; BOP clade; Oryzoideae; Oryzeae; Oryzinae; Oryza; Oryza sativa	.	TRINITY_DN76791_c0_g2_i4.p1	1-450[-]	PROT1_ORYSJ^PROT1_ORYSJ^Q:1-150,H:166-274^31.8%ID^E:6.5e-09^RecName: Full=Proline transporter 1;^Eukaryota; Viridiplantae; Streptophyta; Embryophyta; Tracheophyta; Spermatophyta; Magnoliophyta; Liliopsida; Poales; Poaceae; BOP clade; Oryzoideae; Oryzeae; Oryzinae; Oryza; Oryza sativa	PF01490.17^Aa_trans^Transmembrane amino acid transporter protein^1-70^E:5.7e-06	.	ExpAA=83.98^PredHel=4^Topology=o20-39i46-65o85-107i128-147o	COG0814^amino acid transport	KEGG:osa:4333560	GO:0016021^cellular_component^integral component of membrane`GO:0005886^cellular_component^plasma membrane`GO:0015171^molecular_function^amino acid transmembrane transporter activity`GO:0003333^biological_process^amino acid transmembrane transport	.	.	.
TRINITY_DN76791_c0_g3	TRINITY_DN76791_c0_g3_i2	PROT1_ORYSJ^PROT1_ORYSJ^Q:656-282,H:348-472^39.2%ID^E:5.3e-18^RecName: Full=Proline transporter 1;^Eukaryota; Viridiplantae; Streptophyta; Embryophyta; Tracheophyta; Spermatophyta; Magnoliophyta; Liliopsida; Poales; Poaceae; BOP clade; Oryzoideae; Oryzeae; Oryzinae; Oryza; Oryza sativa	.	TRINITY_DN76791_c0_g3_i2.p1	276-656[-]	PROT1_ARATH^PROT1_ARATH^Q:1-125,H:318-441^33.6%ID^E:2.7e-16^RecName: Full=Proline transporter 1;^Eukaryota; Viridiplantae; Streptophyta; Embryophyta; Tracheophyta; Spermatophyta; Magnoliophyta; eudicotyledons; Gunneridae; Pentapetalae; rosids; malvids; Brassicales; Brassicaceae; Camelineae; Arabidopsis	PF01490.17^Aa_trans^Transmembrane amino acid transporter protein^3-110^E:5e-13	.	ExpAA=64.25^PredHel=3^Topology=i31-50o54-76i92-114o	COG0814^amino acid transport	KEGG:ath:AT2G39890	GO:0016021^cellular_component^integral component of membrane`GO:0005886^cellular_component^plasma membrane`GO:0015193^molecular_function^L-proline transmembrane transporter activity`GO:0015824^biological_process^proline transport	.	.	.
TRINITY_DN76791_c0_g3	TRINITY_DN76791_c0_g3_i3	.	.	.	.	.	.	.	.	.	.	.	.	.	.
TRINITY_DN76791_c0_g3	TRINITY_DN76791_c0_g3_i1	PROT1_ORYSJ^PROT1_ORYSJ^Q:656-282,H:348-472^39.2%ID^E:5.4e-18^RecName: Full=Proline transporter 1;^Eukaryota; Viridiplantae; Streptophyta; Embryophyta; Tracheophyta; Spermatophyta; Magnoliophyta; Liliopsida; Poales; Poaceae; BOP clade; Oryzoideae; Oryzeae; Oryzinae; Oryza; Oryza sativa	.	TRINITY_DN76791_c0_g3_i1.p1	276-656[-]	PROT1_ARATH^PROT1_ARATH^Q:1-125,H:318-441^33.6%ID^E:2.7e-16^RecName: Full=Proline transporter 1;^Eukaryota; Viridiplantae; Streptophyta; Embryophyta; Tracheophyta; Spermatophyta; Magnoliophyta; eudicotyledons; Gunneridae; Pentapetalae; rosids; malvids; Brassicales; Brassicaceae; Camelineae; Arabidopsis	PF01490.17^Aa_trans^Transmembrane amino acid transporter protein^3-110^E:5e-13	.	ExpAA=64.25^PredHel=3^Topology=i31-50o54-76i92-114o	COG0814^amino acid transport	KEGG:ath:AT2G39890	GO:0016021^cellular_component^integral component of membrane`GO:0005886^cellular_component^plasma membrane`GO:0015193^molecular_function^L-proline transmembrane transporter activity`GO:0015824^biological_process^proline transport	.	.	.
TRINITY_DN76706_c1_g3	TRINITY_DN76706_c1_g3_i1	.	.	TRINITY_DN76706_c1_g3_i1.p1	3-299[+]	.	.	.	.	.	.	.	.	.	.
TRINITY_DN76706_c1_g1	TRINITY_DN76706_c1_g1_i9	PHF5A_ARATH^PHF5A_ARATH^Q:362-33,H:1-110^99.1%ID^E:7.1e-65^RecName: Full=PHD finger-like domain-containing protein 5A;^Eukaryota; Viridiplantae; Streptophyta; Embryophyta; Tracheophyta; Spermatophyta; Magnoliophyta; eudicotyledons; Gunneridae; Pentapetalae; rosids; malvids; Brassicales; Brassicaceae; Camelineae; Arabidopsis	.	TRINITY_DN76706_c1_g1_i9.p1	30-362[-]	PHF5A_ARATH^PHF5A_ARATH^Q:1-110,H:1-110^99.1%ID^E:6.2e-65^RecName: Full=PHD finger-like domain-containing protein 5A;^Eukaryota; Viridiplantae; Streptophyta; Embryophyta; Tracheophyta; Spermatophyta; Magnoliophyta; eudicotyledons; Gunneridae; Pentapetalae; rosids; malvids; Brassicales; Brassicaceae; Camelineae; Arabidopsis	PF03660.13^PHF5^PHF5-like protein^1-104^E:2.3e-50	.	.	ENOG4111JIM^PHD finger protein 5A	KEGG:ath:AT1G07170`KEGG:ath:AT2G30000`KO:K12834	GO:0071013^cellular_component^catalytic step 2 spliceosome`GO:0071011^cellular_component^precatalytic spliceosome`GO:0005689^cellular_component^U12-type spliceosomal complex`GO:0005686^cellular_component^U2 snRNP`GO:0000398^biological_process^mRNA splicing, via spliceosome	.	.	.
TRINITY_DN76706_c1_g1	TRINITY_DN76706_c1_g1_i8	PHF5A_ARATH^PHF5A_ARATH^Q:362-33,H:1-110^99.1%ID^E:6.6e-65^RecName: Full=PHD finger-like domain-containing protein 5A;^Eukaryota; Viridiplantae; Streptophyta; Embryophyta; Tracheophyta; Spermatophyta; Magnoliophyta; eudicotyledons; Gunneridae; Pentapetalae; rosids; malvids; Brassicales; Brassicaceae; Camelineae; Arabidopsis	.	TRINITY_DN76706_c1_g1_i8.p1	30-362[-]	PHF5A_ARATH^PHF5A_ARATH^Q:1-110,H:1-110^99.1%ID^E:6.2e-65^RecName: Full=PHD finger-like domain-containing protein 5A;^Eukaryota; Viridiplantae; Streptophyta; Embryophyta; Tracheophyta; Spermatophyta; Magnoliophyta; eudicotyledons; Gunneridae; Pentapetalae; rosids; malvids; Brassicales; Brassicaceae; Camelineae; Arabidopsis	PF03660.13^PHF5^PHF5-like protein^1-104^E:2.3e-50	.	.	ENOG4111JIM^PHD finger protein 5A	KEGG:ath:AT1G07170`KEGG:ath:AT2G30000`KO:K12834	GO:0071013^cellular_component^catalytic step 2 spliceosome`GO:0071011^cellular_component^precatalytic spliceosome`GO:0005689^cellular_component^U12-type spliceosomal complex`GO:0005686^cellular_component^U2 snRNP`GO:0000398^biological_process^mRNA splicing, via spliceosome	.	.	.
TRINITY_DN76706_c1_g1	TRINITY_DN76706_c1_g1_i5	PHF5A_ARATH^PHF5A_ARATH^Q:111-1,H:1-37^100%ID^E:1.4e-16^RecName: Full=PHD finger-like domain-containing protein 5A;^Eukaryota; Viridiplantae; Streptophyta; Embryophyta; Tracheophyta; Spermatophyta; Magnoliophyta; eudicotyledons; Gunneridae; Pentapetalae; rosids; malvids; Brassicales; Brassicaceae; Camelineae; Arabidopsis	.	.	.	.	.	.	.	ENOG4111JIM^PHD finger protein 5A	KEGG:ath:AT1G07170`KEGG:ath:AT2G30000`KO:K12834	GO:0071013^cellular_component^catalytic step 2 spliceosome`GO:0071011^cellular_component^precatalytic spliceosome`GO:0005689^cellular_component^U12-type spliceosomal complex`GO:0005686^cellular_component^U2 snRNP`GO:0000398^biological_process^mRNA splicing, via spliceosome	.	.	.
TRINITY_DN76706_c1_g1	TRINITY_DN76706_c1_g1_i7	PHF5A_ARATH^PHF5A_ARATH^Q:362-33,H:1-110^99.1%ID^E:1.2e-64^RecName: Full=PHD finger-like domain-containing protein 5A;^Eukaryota; Viridiplantae; Streptophyta; Embryophyta; Tracheophyta; Spermatophyta; Magnoliophyta; eudicotyledons; Gunneridae; Pentapetalae; rosids; malvids; Brassicales; Brassicaceae; Camelineae; Arabidopsis	.	TRINITY_DN76706_c1_g1_i7.p1	30-362[-]	PHF5A_ARATH^PHF5A_ARATH^Q:1-110,H:1-110^99.1%ID^E:6.2e-65^RecName: Full=PHD finger-like domain-containing protein 5A;^Eukaryota; Viridiplantae; Streptophyta; Embryophyta; Tracheophyta; Spermatophyta; Magnoliophyta; eudicotyledons; Gunneridae; Pentapetalae; rosids; malvids; Brassicales; Brassicaceae; Camelineae; Arabidopsis	PF03660.13^PHF5^PHF5-like protein^1-104^E:2.3e-50	.	.	ENOG4111JIM^PHD finger protein 5A	KEGG:ath:AT1G07170`KEGG:ath:AT2G30000`KO:K12834	GO:0071013^cellular_component^catalytic step 2 spliceosome`GO:0071011^cellular_component^precatalytic spliceosome`GO:0005689^cellular_component^U12-type spliceosomal complex`GO:0005686^cellular_component^U2 snRNP`GO:0000398^biological_process^mRNA splicing, via spliceosome	.	.	.
TRINITY_DN76706_c1_g1	TRINITY_DN76706_c1_g1_i6	PHF5A_ARATH^PHF5A_ARATH^Q:362-33,H:1-110^99.1%ID^E:2e-64^RecName: Full=PHD finger-like domain-containing protein 5A;^Eukaryota; Viridiplantae; Streptophyta; Embryophyta; Tracheophyta; Spermatophyta; Magnoliophyta; eudicotyledons; Gunneridae; Pentapetalae; rosids; malvids; Brassicales; Brassicaceae; Camelineae; Arabidopsis	.	TRINITY_DN76706_c1_g1_i6.p1	30-362[-]	PHF5A_ARATH^PHF5A_ARATH^Q:1-110,H:1-110^99.1%ID^E:6.2e-65^RecName: Full=PHD finger-like domain-containing protein 5A;^Eukaryota; Viridiplantae; Streptophyta; Embryophyta; Tracheophyta; Spermatophyta; Magnoliophyta; eudicotyledons; Gunneridae; Pentapetalae; rosids; malvids; Brassicales; Brassicaceae; Camelineae; Arabidopsis	PF03660.13^PHF5^PHF5-like protein^1-104^E:2.3e-50	.	.	ENOG4111JIM^PHD finger protein 5A	KEGG:ath:AT1G07170`KEGG:ath:AT2G30000`KO:K12834	GO:0071013^cellular_component^catalytic step 2 spliceosome`GO:0071011^cellular_component^precatalytic spliceosome`GO:0005689^cellular_component^U12-type spliceosomal complex`GO:0005686^cellular_component^U2 snRNP`GO:0000398^biological_process^mRNA splicing, via spliceosome	.	.	.
TRINITY_DN76706_c1_g1	TRINITY_DN76706_c1_g1_i1	PHF5A_ARATH^PHF5A_ARATH^Q:362-33,H:1-110^99.1%ID^E:2.1e-64^RecName: Full=PHD finger-like domain-containing protein 5A;^Eukaryota; Viridiplantae; Streptophyta; Embryophyta; Tracheophyta; Spermatophyta; Magnoliophyta; eudicotyledons; Gunneridae; Pentapetalae; rosids; malvids; Brassicales; Brassicaceae; Camelineae; Arabidopsis	.	TRINITY_DN76706_c1_g1_i1.p1	30-362[-]	PHF5A_ARATH^PHF5A_ARATH^Q:1-110,H:1-110^99.1%ID^E:6.2e-65^RecName: Full=PHD finger-like domain-containing protein 5A;^Eukaryota; Viridiplantae; Streptophyta; Embryophyta; Tracheophyta; Spermatophyta; Magnoliophyta; eudicotyledons; Gunneridae; Pentapetalae; rosids; malvids; Brassicales; Brassicaceae; Camelineae; Arabidopsis	PF03660.13^PHF5^PHF5-like protein^1-104^E:2.3e-50	.	.	ENOG4111JIM^PHD finger protein 5A	KEGG:ath:AT1G07170`KEGG:ath:AT2G30000`KO:K12834	GO:0071013^cellular_component^catalytic step 2 spliceosome`GO:0071011^cellular_component^precatalytic spliceosome`GO:0005689^cellular_component^U12-type spliceosomal complex`GO:0005686^cellular_component^U2 snRNP`GO:0000398^biological_process^mRNA splicing, via spliceosome	.	.	.
TRINITY_DN76706_c1_g1	TRINITY_DN76706_c1_g1_i3	PHF5A_ARATH^PHF5A_ARATH^Q:362-33,H:1-110^99.1%ID^E:1.1e-64^RecName: Full=PHD finger-like domain-containing protein 5A;^Eukaryota; Viridiplantae; Streptophyta; Embryophyta; Tracheophyta; Spermatophyta; Magnoliophyta; eudicotyledons; Gunneridae; Pentapetalae; rosids; malvids; Brassicales; Brassicaceae; Camelineae; Arabidopsis	.	TRINITY_DN76706_c1_g1_i3.p1	30-362[-]	PHF5A_ARATH^PHF5A_ARATH^Q:1-110,H:1-110^99.1%ID^E:6.2e-65^RecName: Full=PHD finger-like domain-containing protein 5A;^Eukaryota; Viridiplantae; Streptophyta; Embryophyta; Tracheophyta; Spermatophyta; Magnoliophyta; eudicotyledons; Gunneridae; Pentapetalae; rosids; malvids; Brassicales; Brassicaceae; Camelineae; Arabidopsis	PF03660.13^PHF5^PHF5-like protein^1-104^E:2.3e-50	.	.	ENOG4111JIM^PHD finger protein 5A	KEGG:ath:AT1G07170`KEGG:ath:AT2G30000`KO:K12834	GO:0071013^cellular_component^catalytic step 2 spliceosome`GO:0071011^cellular_component^precatalytic spliceosome`GO:0005689^cellular_component^U12-type spliceosomal complex`GO:0005686^cellular_component^U2 snRNP`GO:0000398^biological_process^mRNA splicing, via spliceosome	.	.	.
TRINITY_DN76706_c1_g1	TRINITY_DN76706_c1_g1_i2	PHF5A_ARATH^PHF5A_ARATH^Q:370-149,H:37-110^97.3%ID^E:1.6e-40^RecName: Full=PHD finger-like domain-containing protein 5A;^Eukaryota; Viridiplantae; Streptophyta; Embryophyta; Tracheophyta; Spermatophyta; Magnoliophyta; eudicotyledons; Gunneridae; Pentapetalae; rosids; malvids; Brassicales; Brassicaceae; Camelineae; Arabidopsis	.	.	.	.	.	.	.	ENOG4111JIM^PHD finger protein 5A	KEGG:ath:AT1G07170`KEGG:ath:AT2G30000`KO:K12834	GO:0071013^cellular_component^catalytic step 2 spliceosome`GO:0071011^cellular_component^precatalytic spliceosome`GO:0005689^cellular_component^U12-type spliceosomal complex`GO:0005686^cellular_component^U2 snRNP`GO:0000398^biological_process^mRNA splicing, via spliceosome	.	.	.
TRINITY_DN76727_c0_g5	TRINITY_DN76727_c0_g5_i1	.	.	TRINITY_DN76727_c0_g5_i1.p1	1-504[-]	.	.	.	.	.	.	.	.	.	.
TRINITY_DN76727_c0_g6	TRINITY_DN76727_c0_g6_i1	.	.	TRINITY_DN76727_c0_g6_i1.p1	3-485[-]	.	.	.	.	.	.	.	.	.	.
TRINITY_DN76727_c0_g1	TRINITY_DN76727_c0_g1_i5	.	.	TRINITY_DN76727_c0_g1_i5.p1	2-1114[-]	.	PF12796.6^Ank_2^Ankyrin repeats (3 copies)^49-137^E:8.7e-11	.	.	.	.	.	.	.	.
TRINITY_DN76727_c0_g1	TRINITY_DN76727_c0_g1_i6	.	.	TRINITY_DN76727_c0_g1_i6.p1	2-532[-]	.	PF12796.6^Ank_2^Ankyrin repeats (3 copies)^38-124^E:7.2e-10`PF13637.5^Ank_4^Ankyrin repeats (many copies)^64-117^E:8.7e-07`PF12796.6^Ank_2^Ankyrin repeats (3 copies)^96-150^E:1e-07`PF13637.5^Ank_4^Ankyrin repeats (many copies)^97-148^E:6.9e-08`PF13606.5^Ank_3^Ankyrin repeat^98-123^E:0.0044	.	.	.	.	.	GO:0005515^molecular_function^protein binding	.	.
TRINITY_DN76727_c0_g1	TRINITY_DN76727_c0_g1_i7	.	.	TRINITY_DN76727_c0_g1_i7.p1	1-579[-]	.	.	.	.	.	.	.	.	.	.
TRINITY_DN76727_c0_g1	TRINITY_DN76727_c0_g1_i1	.	.	TRINITY_DN76727_c0_g1_i1.p1	120-929[-]	.	.	.	.	.	.	.	.	.	.
TRINITY_DN76727_c0_g1	TRINITY_DN76727_c0_g1_i2	.	.	TRINITY_DN76727_c0_g1_i2.p1	2-1135[-]	.	PF12796.6^Ank_2^Ankyrin repeats (3 copies)^56-144^E:9.3e-11	.	.	.	.	.	.	.	.
TRINITY_DN76727_c0_g1	TRINITY_DN76727_c0_g1_i3	.	.	TRINITY_DN76727_c0_g1_i3.p1	2-478[-]	.	PF12796.6^Ank_2^Ankyrin repeats (3 copies)^39-106^E:9.9e-10`PF13637.5^Ank_4^Ankyrin repeats (many copies)^46-99^E:7.2e-07`PF12796.6^Ank_2^Ankyrin repeats (3 copies)^79-132^E:1.4e-07`PF13637.5^Ank_4^Ankyrin repeats (many copies)^79-130^E:5.5e-08`PF13606.5^Ank_3^Ankyrin repeat^80-105^E:0.0037	.	.	.	.	.	GO:0005515^molecular_function^protein binding	.	.
TRINITY_DN76727_c0_g1	TRINITY_DN76727_c0_g1_i8	.	.	TRINITY_DN76727_c0_g1_i8.p1	181-1287[-]	.	PF12796.6^Ank_2^Ankyrin repeats (3 copies)^56-144^E:8.6e-11	.	.	.	.	.	.	.	.
TRINITY_DN76727_c0_g1	TRINITY_DN76727_c0_g1_i9	.	.	TRINITY_DN76727_c0_g1_i9.p1	2-961[-]	.	PF12796.6^Ank_2^Ankyrin repeats (3 copies)^2-87^E:4.7e-08`PF13637.5^Ank_4^Ankyrin repeats (many copies)^30-79^E:0.0001	.	.	.	.	.	.	.	.
TRINITY_DN76727_c0_g1	TRINITY_DN76727_c0_g1_i18	.	.	TRINITY_DN76727_c0_g1_i18.p1	2-460[-]	.	.	.	.	.	.	.	.	.	.
TRINITY_DN76727_c0_g1	TRINITY_DN76727_c0_g1_i19	.	.	TRINITY_DN76727_c0_g1_i19.p1	121-648[-]	.	PF12796.6^Ank_2^Ankyrin repeats (3 copies)^48-157^E:2.8e-10	.	.	.	.	.	.	.	.
TRINITY_DN76727_c0_g1	TRINITY_DN76727_c0_g1_i16	.	.	TRINITY_DN76727_c0_g1_i16.p1	1-1146[-]	.	PF12796.6^Ank_2^Ankyrin repeats (3 copies)^48-157^E:1.8e-09	.	.	.	.	.	.	.	.
TRINITY_DN76727_c0_g1	TRINITY_DN76727_c0_g1_i17	.	.	TRINITY_DN76727_c0_g1_i17.p1	2-331[-]	.	.	.	.	.	.	.	.	.	.
TRINITY_DN76727_c0_g1	TRINITY_DN76727_c0_g1_i14	.	.	.	.	.	.	.	.	.	.	.	.	.	.
TRINITY_DN76727_c0_g1	TRINITY_DN76727_c0_g1_i12	.	.	TRINITY_DN76727_c0_g1_i12.p1	2-580[-]	.	.	.	.	.	.	.	.	.	.
TRINITY_DN76727_c0_g1	TRINITY_DN76727_c0_g1_i13	.	.	TRINITY_DN76727_c0_g1_i13.p1	1-714[-]	.	.	.	.	.	.	.	.	.	.
TRINITY_DN76727_c0_g1	TRINITY_DN76727_c0_g1_i10	.	.	TRINITY_DN76727_c0_g1_i10.p1	181-1266[-]	.	PF12796.6^Ank_2^Ankyrin repeats (3 copies)^49-137^E:8.3e-11	.	.	.	.	.	.	.	.
TRINITY_DN76727_c0_g1	TRINITY_DN76727_c0_g1_i11	.	.	TRINITY_DN76727_c0_g1_i11.p1	2-1015[-]	.	PF12796.6^Ank_2^Ankyrin repeats (3 copies)^16-104^E:7.2e-11	.	.	.	.	.	.	.	.
TRINITY_DN76727_c0_g3	TRINITY_DN76727_c0_g3_i4	.	.	TRINITY_DN76727_c0_g3_i4.p1	1-480[-]	.	PF13637.5^Ank_4^Ankyrin repeats (many copies)^46-100^E:1.6e-05`PF12796.6^Ank_2^Ankyrin repeats (3 copies)^63-142^E:9.4e-08	.	ExpAA=17.62^PredHel=1^Topology=o74-96i	.	.	.	.	.	.
TRINITY_DN76727_c0_g3	TRINITY_DN76727_c0_g3_i5	.	.	TRINITY_DN76727_c0_g3_i5.p1	3-1268[-]	.	PF12796.6^Ank_2^Ankyrin repeats (3 copies)^19-105^E:2.9e-06`PF13637.5^Ank_4^Ankyrin repeats (many copies)^46-100^E:8.4e-05`PF12796.6^Ank_2^Ankyrin repeats (3 copies)^48-142^E:1.1e-08	.	.	.	.	.	.	.	.
TRINITY_DN76727_c0_g3	TRINITY_DN76727_c0_g3_i2	.	.	TRINITY_DN76727_c0_g3_i2.p1	81-782[-]	.	PF12796.6^Ank_2^Ankyrin repeats (3 copies)^37-123^E:9.7e-07`PF13637.5^Ank_4^Ankyrin repeats (many copies)^64-118^E:3.3e-05`PF12796.6^Ank_2^Ankyrin repeats (3 copies)^66-160^E:3.3e-09	.	.	.	.	.	.	.	.
TRINITY_DN76727_c0_g3	TRINITY_DN76727_c0_g3_i3	.	.	TRINITY_DN76727_c0_g3_i3.p1	3-872[-]	.	.	.	.	.	.	.	.	.	.
TRINITY_DN76727_c0_g3	TRINITY_DN76727_c0_g3_i1	.	.	TRINITY_DN76727_c0_g3_i1.p1	3-1268[-]	.	PF12796.6^Ank_2^Ankyrin repeats (3 copies)^19-105^E:2.9e-06`PF13637.5^Ank_4^Ankyrin repeats (many copies)^46-100^E:8.4e-05`PF12796.6^Ank_2^Ankyrin repeats (3 copies)^48-142^E:1.1e-08	.	.	.	.	.	.	.	.
TRINITY_DN76703_c2_g1	TRINITY_DN76703_c2_g1_i2	.	.	TRINITY_DN76703_c2_g1_i2.p1	3-344[-]	.	.	.	.	.	.	.	.	.	.
TRINITY_DN76703_c2_g1	TRINITY_DN76703_c2_g1_i3	.	.	TRINITY_DN76703_c2_g1_i3.p1	26-394[-]	.	.	.	ExpAA=21.27^PredHel=1^Topology=i71-93o	.	.	.	.	.	.
TRINITY_DN76703_c2_g1	TRINITY_DN76703_c2_g1_i6	.	.	.	.	.	.	.	.	.	.	.	.	.	.
TRINITY_DN76703_c2_g1	TRINITY_DN76703_c2_g1_i4	.	.	.	.	.	.	.	.	.	.	.	.	.	.
TRINITY_DN76703_c2_g1	TRINITY_DN76703_c2_g1_i5	RNHX1_ARATH^RNHX1_ARATH^Q:269-6,H:9-93^37.5%ID^E:2.8e-11^RecName: Full=Putative ribonuclease H protein At1g65750;^Eukaryota; Viridiplantae; Streptophyta; Embryophyta; Tracheophyta; Spermatophyta; Magnoliophyta; eudicotyledons; Gunneridae; Pentapetalae; rosids; malvids; Brassicales; Brassicaceae; Camelineae; Arabidopsis	.	TRINITY_DN76703_c2_g1_i5.p1	3-305[-]	.	.	.	.	.	.	.	.	.	.
TRINITY_DN76766_c0_g1	TRINITY_DN76766_c0_g1_i4	.	.	TRINITY_DN76766_c0_g1_i4.p1	362-1099[-]	.	PF05536.10^Neurochondrin^Neurochondrin^13-170^E:1.5e-29	.	.	.	.	.	.	.	.
TRINITY_DN76766_c0_g1	TRINITY_DN76766_c0_g1_i5	NCDN_CHICK^NCDN_CHICK^Q:2354-741,H:2-522^24.3%ID^E:1.7e-21^RecName: Full=Neurochondrin;^Eukaryota; Metazoa; Chordata; Craniata; Vertebrata; Euteleostomi; Archelosauria; Archosauria; Dinosauria; Saurischia; Theropoda; Coelurosauria; Aves; Neognathae; Galloanserae; Galliformes; Phasianidae; Phasianinae; Gallus	.	TRINITY_DN76766_c0_g1_i5.p1	453-2348[-]	NCDN_XENLA^NCDN_XENLA^Q:6-596,H:16-581^23.8%ID^E:1e-23^RecName: Full=Neurochondrin;^Eukaryota; Metazoa; Chordata; Craniata; Vertebrata; Euteleostomi; Amphibia; Batrachia; Anura; Pipoidea; Pipidae; Xenopodinae; Xenopus; Xenopus	PF05536.10^Neurochondrin^Neurochondrin^2-558^E:3.4e-135	.	.	.	KEGG:xla:494655	GO:0005829^cellular_component^cytosol`GO:0030425^cellular_component^dendrite`GO:0043025^cellular_component^neuronal cell body`GO:0031175^biological_process^neuron projection development	.	.	.
TRINITY_DN76766_c0_g1	TRINITY_DN76766_c0_g1_i1	.	.	.	.	.	.	.	.	.	.	.	.	.	.
TRINITY_DN76766_c0_g1	TRINITY_DN76766_c0_g1_i3	.	.	.	.	.	.	.	.	.	.	.	.	.	.
TRINITY_DN76766_c0_g1	TRINITY_DN76766_c0_g1_i9	.	.	TRINITY_DN76766_c0_g1_i9.p1	453-1190[-]	.	PF05536.10^Neurochondrin^Neurochondrin^13-170^E:1.5e-29	.	.	.	.	.	.	.	.
TRINITY_DN76766_c0_g1	TRINITY_DN76766_c0_g1_i21	NCDN_CHICK^NCDN_CHICK^Q:2354-741,H:2-522^24.3%ID^E:1.7e-21^RecName: Full=Neurochondrin;^Eukaryota; Metazoa; Chordata; Craniata; Vertebrata; Euteleostomi; Archelosauria; Archosauria; Dinosauria; Saurischia; Theropoda; Coelurosauria; Aves; Neognathae; Galloanserae; Galliformes; Phasianidae; Phasianinae; Gallus	.	TRINITY_DN76766_c0_g1_i21.p1	453-2348[-]	NCDN_XENLA^NCDN_XENLA^Q:6-596,H:16-581^23.8%ID^E:1.4e-23^RecName: Full=Neurochondrin;^Eukaryota; Metazoa; Chordata; Craniata; Vertebrata; Euteleostomi; Amphibia; Batrachia; Anura; Pipoidea; Pipidae; Xenopodinae; Xenopus; Xenopus	PF05536.10^Neurochondrin^Neurochondrin^2-558^E:9.3e-135	.	.	.	KEGG:xla:494655	GO:0005829^cellular_component^cytosol`GO:0030425^cellular_component^dendrite`GO:0043025^cellular_component^neuronal cell body`GO:0031175^biological_process^neuron projection development	.	.	.
TRINITY_DN76766_c0_g1	TRINITY_DN76766_c0_g1_i20	.	.	TRINITY_DN76766_c0_g1_i20.p2	362-748[-]	.	.	.	.	.	.	.	.	.	.
TRINITY_DN76766_c0_g1	TRINITY_DN76766_c0_g1_i18	NCDN_XENLA^NCDN_XENLA^Q:1504-470,H:251-581^22.4%ID^E:6.4e-08^RecName: Full=Neurochondrin;^Eukaryota; Metazoa; Chordata; Craniata; Vertebrata; Euteleostomi; Amphibia; Batrachia; Anura; Pipoidea; Pipidae; Xenopodinae; Xenopus; Xenopus	.	TRINITY_DN76766_c0_g1_i18.p1	362-1525[-]	NCDN_XENLA^NCDN_XENLA^Q:8-352,H:251-581^22.4%ID^E:4.9e-08^RecName: Full=Neurochondrin;^Eukaryota; Metazoa; Chordata; Craniata; Vertebrata; Euteleostomi; Amphibia; Batrachia; Anura; Pipoidea; Pipidae; Xenopodinae; Xenopus; Xenopus	PF05536.10^Neurochondrin^Neurochondrin^1-312^E:2.2e-68	.	.	.	KEGG:xla:494655	GO:0005829^cellular_component^cytosol`GO:0030425^cellular_component^dendrite`GO:0043025^cellular_component^neuronal cell body`GO:0031175^biological_process^neuron projection development	.	.	.
TRINITY_DN76766_c0_g1	TRINITY_DN76766_c0_g1_i19	.	.	.	.	.	.	.	.	.	.	.	.	.	.
TRINITY_DN76766_c0_g1	TRINITY_DN76766_c0_g1_i16	.	.	.	.	.	.	.	.	.	.	.	.	.	.
TRINITY_DN76766_c0_g1	TRINITY_DN76766_c0_g1_i17	NCDN_CHICK^NCDN_CHICK^Q:2263-650,H:2-522^24.3%ID^E:1.6e-21^RecName: Full=Neurochondrin;^Eukaryota; Metazoa; Chordata; Craniata; Vertebrata; Euteleostomi; Archelosauria; Archosauria; Dinosauria; Saurischia; Theropoda; Coelurosauria; Aves; Neognathae; Galloanserae; Galliformes; Phasianidae; Phasianinae; Gallus	.	TRINITY_DN76766_c0_g1_i17.p1	362-2257[-]	NCDN_XENLA^NCDN_XENLA^Q:6-596,H:16-581^23.8%ID^E:1.4e-23^RecName: Full=Neurochondrin;^Eukaryota; Metazoa; Chordata; Craniata; Vertebrata; Euteleostomi; Amphibia; Batrachia; Anura; Pipoidea; Pipidae; Xenopodinae; Xenopus; Xenopus	PF05536.10^Neurochondrin^Neurochondrin^2-558^E:9.3e-135	.	.	.	KEGG:xla:494655	GO:0005829^cellular_component^cytosol`GO:0030425^cellular_component^dendrite`GO:0043025^cellular_component^neuronal cell body`GO:0031175^biological_process^neuron projection development	.	.	.
TRINITY_DN76766_c0_g1	TRINITY_DN76766_c0_g1_i15	.	.	.	.	.	.	.	.	.	.	.	.	.	.
TRINITY_DN76766_c0_g1	TRINITY_DN76766_c0_g1_i12	.	.	.	.	.	.	.	.	.	.	.	.	.	.
TRINITY_DN76766_c0_g1	TRINITY_DN76766_c0_g1_i13	NCDN_CHICK^NCDN_CHICK^Q:928-260,H:2-215^27.1%ID^E:5.8e-08^RecName: Full=Neurochondrin;^Eukaryota; Metazoa; Chordata; Craniata; Vertebrata; Euteleostomi; Archelosauria; Archosauria; Dinosauria; Saurischia; Theropoda; Coelurosauria; Aves; Neognathae; Galloanserae; Galliformes; Phasianidae; Phasianinae; Gallus	.	TRINITY_DN76766_c0_g1_i13.p1	116-922[-]	.	PF05536.10^Neurochondrin^Neurochondrin^2-232^E:3.8e-60	.	.	.	.	.	.	.	.
TRINITY_DN76766_c0_g1	TRINITY_DN76766_c0_g1_i10	NCDN_CHICK^NCDN_CHICK^Q:2354-741,H:2-522^24.3%ID^E:1.7e-21^RecName: Full=Neurochondrin;^Eukaryota; Metazoa; Chordata; Craniata; Vertebrata; Euteleostomi; Archelosauria; Archosauria; Dinosauria; Saurischia; Theropoda; Coelurosauria; Aves; Neognathae; Galloanserae; Galliformes; Phasianidae; Phasianinae; Gallus	.	TRINITY_DN76766_c0_g1_i10.p1	453-2348[-]	NCDN_XENLA^NCDN_XENLA^Q:6-596,H:16-581^23.8%ID^E:1.4e-23^RecName: Full=Neurochondrin;^Eukaryota; Metazoa; Chordata; Craniata; Vertebrata; Euteleostomi; Amphibia; Batrachia; Anura; Pipoidea; Pipidae; Xenopodinae; Xenopus; Xenopus	PF05536.10^Neurochondrin^Neurochondrin^2-558^E:9.3e-135	.	.	.	KEGG:xla:494655	GO:0005829^cellular_component^cytosol`GO:0030425^cellular_component^dendrite`GO:0043025^cellular_component^neuronal cell body`GO:0031175^biological_process^neuron projection development	.	.	.
TRINITY_DN76766_c0_g1	TRINITY_DN76766_c0_g1_i11	NCDN_XENLA^NCDN_XENLA^Q:2438-561,H:16-581^22.3%ID^E:8.9e-18^RecName: Full=Neurochondrin;^Eukaryota; Metazoa; Chordata; Craniata; Vertebrata; Euteleostomi; Amphibia; Batrachia; Anura; Pipoidea; Pipidae; Xenopodinae; Xenopus; Xenopus	.	TRINITY_DN76766_c0_g1_i11.p1	1302-2453[-]	.	PF05536.10^Neurochondrin^Neurochondrin^2-366^E:1.5e-90	.	.	.	.	.	.	.	.
TRINITY_DN76714_c0_g1	TRINITY_DN76714_c0_g1_i1	STSYN_PEA^STSYN_PEA^Q:102-1058,H:1-316^66.4%ID^E:3e-129^RecName: Full=Stachyose synthase;^Eukaryota; Viridiplantae; Streptophyta; Embryophyta; Tracheophyta; Spermatophyta; Magnoliophyta; eudicotyledons; Gunneridae; Pentapetalae; rosids; fabids; Fabales; Fabaceae; Papilionoideae; Fabeae; Pisum	.	TRINITY_DN76714_c0_g1_i1.p1	102-1061[+]	STSYN_PEA^STSYN_PEA^Q:1-319,H:1-316^66.4%ID^E:3.5e-129^RecName: Full=Stachyose synthase;^Eukaryota; Viridiplantae; Streptophyta; Embryophyta; Tracheophyta; Spermatophyta; Magnoliophyta; eudicotyledons; Gunneridae; Pentapetalae; rosids; fabids; Fabales; Fabaceae; Papilionoideae; Fabeae; Pisum	PF05691.11^Raffinose_syn^Raffinose synthase or seed imbibition protein Sip1^24-308^E:7e-110	.	.	.	.	GO:0005737^cellular_component^cytoplasm`GO:0047268^molecular_function^galactinol-raffinose galactosyltransferase activity`GO:0009312^biological_process^oligosaccharide biosynthetic process`GO:0033532^biological_process^stachyose biosynthetic process	.	.	.
TRINITY_DN76714_c0_g1	TRINITY_DN76714_c0_g1_i2	STSYN_PEA^STSYN_PEA^Q:210-2738,H:19-853^70.5%ID^E:0^RecName: Full=Stachyose synthase;^Eukaryota; Viridiplantae; Streptophyta; Embryophyta; Tracheophyta; Spermatophyta; Magnoliophyta; eudicotyledons; Gunneridae; Pentapetalae; rosids; fabids; Fabales; Fabaceae; Papilionoideae; Fabeae; Pisum	.	TRINITY_DN76714_c0_g1_i2.p1	189-2741[+]	STSYN_PEA^STSYN_PEA^Q:8-850,H:19-853^70.5%ID^E:0^RecName: Full=Stachyose synthase;^Eukaryota; Viridiplantae; Streptophyta; Embryophyta; Tracheophyta; Spermatophyta; Magnoliophyta; eudicotyledons; Gunneridae; Pentapetalae; rosids; fabids; Fabales; Fabaceae; Papilionoideae; Fabeae; Pisum	PF05691.11^Raffinose_syn^Raffinose synthase or seed imbibition protein Sip1^8-833^E:0	.	.	.	.	GO:0005737^cellular_component^cytoplasm`GO:0047268^molecular_function^galactinol-raffinose galactosyltransferase activity`GO:0009312^biological_process^oligosaccharide biosynthetic process`GO:0033532^biological_process^stachyose biosynthetic process	.	.	.
TRINITY_DN76714_c0_g1	TRINITY_DN76714_c0_g1_i3	STSYN_PEA^STSYN_PEA^Q:210-2768,H:19-853^68.3%ID^E:0^RecName: Full=Stachyose synthase;^Eukaryota; Viridiplantae; Streptophyta; Embryophyta; Tracheophyta; Spermatophyta; Magnoliophyta; eudicotyledons; Gunneridae; Pentapetalae; rosids; fabids; Fabales; Fabaceae; Papilionoideae; Fabeae; Pisum	.	TRINITY_DN76714_c0_g1_i3.p1	189-2771[+]	STSYN_PEA^STSYN_PEA^Q:8-860,H:19-853^68.3%ID^E:0^RecName: Full=Stachyose synthase;^Eukaryota; Viridiplantae; Streptophyta; Embryophyta; Tracheophyta; Spermatophyta; Magnoliophyta; eudicotyledons; Gunneridae; Pentapetalae; rosids; fabids; Fabales; Fabaceae; Papilionoideae; Fabeae; Pisum	PF05691.11^Raffinose_syn^Raffinose synthase or seed imbibition protein Sip1^8-830^E:0	.	.	.	.	GO:0005737^cellular_component^cytoplasm`GO:0047268^molecular_function^galactinol-raffinose galactosyltransferase activity`GO:0009312^biological_process^oligosaccharide biosynthetic process`GO:0033532^biological_process^stachyose biosynthetic process	.	.	.
TRINITY_DN76701_c3_g1	TRINITY_DN76701_c3_g1_i11	.	.	TRINITY_DN76701_c3_g1_i11.p1	364-897[-]	.	PF04720.11^PDDEXK_6^PDDEXK-like family of unknown function^2-96^E:3.7e-46	.	.	.	.	.	.	.	.
TRINITY_DN76701_c3_g1	TRINITY_DN76701_c3_g1_i10	.	.	.	.	.	.	.	.	.	.	.	.	.	.
TRINITY_DN76701_c3_g1	TRINITY_DN76701_c3_g1_i9	.	.	TRINITY_DN76701_c3_g1_i9.p1	1780-2667[-]	.	PF04720.11^PDDEXK_6^PDDEXK-like family of unknown function^7-214^E:1.3e-74	.	.	.	.	.	.	.	.
TRINITY_DN76701_c3_g1	TRINITY_DN76701_c3_g1_i8	.	.	TRINITY_DN76701_c3_g1_i8.p1	201-500[-]	.	.	.	.	.	.	.	.	.	.
TRINITY_DN76701_c3_g1	TRINITY_DN76701_c3_g1_i3	.	.	.	.	.	.	.	.	.	.	.	.	.	.
TRINITY_DN76701_c3_g1	TRINITY_DN76701_c3_g1_i2	.	.	.	.	.	.	.	.	.	.	.	.	.	.
TRINITY_DN76701_c3_g1	TRINITY_DN76701_c3_g1_i1	.	.	.	.	.	.	.	.	.	.	.	.	.	.
TRINITY_DN76701_c3_g1	TRINITY_DN76701_c3_g1_i7	.	.	TRINITY_DN76701_c3_g1_i7.p1	1695-2219[-]	.	PF04720.11^PDDEXK_6^PDDEXK-like family of unknown function^1-93^E:1.6e-45	.	.	.	.	.	.	.	.
TRINITY_DN76701_c3_g1	TRINITY_DN76701_c3_g1_i6	.	.	.	.	.	.	.	.	.	.	.	.	.	.
TRINITY_DN76701_c3_g1	TRINITY_DN76701_c3_g1_i5	.	.	TRINITY_DN76701_c3_g1_i5.p1	201-512[-]	.	.	.	.	.	.	.	.	.	.
TRINITY_DN76701_c3_g1	TRINITY_DN76701_c3_g1_i4	.	.	.	.	.	.	.	.	.	.	.	.	.	.
TRINITY_DN76701_c1_g1	TRINITY_DN76701_c1_g1_i1	.	.	TRINITY_DN76701_c1_g1_i1.p1	2-1804[+]	.	.	.	.	.	.	.	.	.	.
TRINITY_DN76701_c2_g1	TRINITY_DN76701_c2_g1_i2	.	.	TRINITY_DN76701_c2_g1_i2.p1	364-693[+]	.	.	.	.	.	.	.	.	.	.
TRINITY_DN76701_c2_g1	TRINITY_DN76701_c2_g1_i1	.	.	TRINITY_DN76701_c2_g1_i1.p1	239-568[+]	.	.	.	.	.	.	.	.	.	.
TRINITY_DN76713_c1_g1	TRINITY_DN76713_c1_g1_i4	.	.	.	.	.	.	.	.	.	.	.	.	.	.
TRINITY_DN76713_c1_g1	TRINITY_DN76713_c1_g1_i1	.	.	TRINITY_DN76713_c1_g1_i1.p1	1-390[+]	.	.	.	.	.	.	.	.	.	.
TRINITY_DN76713_c1_g1	TRINITY_DN76713_c1_g1_i3	.	.	TRINITY_DN76713_c1_g1_i3.p1	1-360[+]	.	.	.	.	.	.	.	.	.	.
TRINITY_DN76713_c1_g1	TRINITY_DN76713_c1_g1_i2	.	.	TRINITY_DN76713_c1_g1_i2.p1	1-483[+]	.	.	.	.	.	.	.	.	.	.
TRINITY_DN76713_c2_g1	TRINITY_DN76713_c2_g1_i3	MAD55_ORYSJ^MAD55_ORYSJ^Q:475-305,H:134-190^57.9%ID^E:2.1e-10^RecName: Full=MADS-box transcription factor 55;^Eukaryota; Viridiplantae; Streptophyta; Embryophyta; Tracheophyta; Spermatophyta; Magnoliophyta; Liliopsida; Poales; Poaceae; BOP clade; Oryzoideae; Oryzeae; Oryzinae; Oryza; Oryza sativa	.	TRINITY_DN76713_c2_g1_i3.p1	101-475[-]	MAD55_ORYSJ^MAD55_ORYSJ^Q:1-57,H:134-190^57.9%ID^E:1.7e-10^RecName: Full=MADS-box transcription factor 55;^Eukaryota; Viridiplantae; Streptophyta; Embryophyta; Tracheophyta; Spermatophyta; Magnoliophyta; Liliopsida; Poales; Poaceae; BOP clade; Oryzoideae; Oryzeae; Oryzinae; Oryza; Oryza sativa	PF01486.16^K-box^K-box region^2-58^E:2e-11	.	ExpAA=24.89^PredHel=1^Topology=i59-81o	.	KEGG:osa:4340495	GO:0005634^cellular_component^nucleus`GO:0003700^molecular_function^DNA-binding transcription factor activity`GO:0046983^molecular_function^protein dimerization activity`GO:0000977^molecular_function^RNA polymerase II regulatory region sequence-specific DNA binding`GO:0045944^biological_process^positive regulation of transcription by RNA polymerase II`GO:0006351^biological_process^transcription, …	GO:0003700^molecular_function^DNA-binding transcription factor activity`GO:0006355^biological_process^regulation of transcription, DNA-templated`GO:0005634^cellular_component^nucleus	.	.
TRINITY_DN76713_c2_g1	TRINITY_DN76713_c2_g1_i1	MAD55_ORYSJ^MAD55_ORYSJ^Q:392-81,H:134-245^46.4%ID^E:1.1e-15^RecName: Full=MADS-box transcription factor 55;^Eukaryota; Viridiplantae; Streptophyta; Embryophyta; Tracheophyta; Spermatophyta; Magnoliophyta; Liliopsida; Poales; Poaceae; BOP clade; Oryzoideae; Oryzeae; Oryzinae; Oryza; Oryza sativa	.	.	.	.	.	.	.	.	KEGG:osa:4340495	GO:0005634^cellular_component^nucleus`GO:0003700^molecular_function^DNA-binding transcription factor activity`GO:0046983^molecular_function^protein dimerization activity`GO:0000977^molecular_function^RNA polymerase II regulatory region sequence-specific DNA binding`GO:0045944^biological_process^positive regulation of transcription by RNA polymerase II`GO:0006351^biological_process^transcription, …	.	.	.
TRINITY_DN76713_c2_g1	TRINITY_DN76713_c2_g1_i6	MAD55_ORYSJ^MAD55_ORYSJ^Q:773-603,H:134-190^57.9%ID^E:3.5e-10^RecName: Full=MADS-box transcription factor 55;^Eukaryota; Viridiplantae; Streptophyta; Embryophyta; Tracheophyta; Spermatophyta; Magnoliophyta; Liliopsida; Poales; Poaceae; BOP clade; Oryzoideae; Oryzeae; Oryzinae; Oryza; Oryza sativa	.	.	.	.	.	.	.	.	KEGG:osa:4340495	GO:0005634^cellular_component^nucleus`GO:0003700^molecular_function^DNA-binding transcription factor activity`GO:0046983^molecular_function^protein dimerization activity`GO:0000977^molecular_function^RNA polymerase II regulatory region sequence-specific DNA binding`GO:0045944^biological_process^positive regulation of transcription by RNA polymerase II`GO:0006351^biological_process^transcription, …	.	.	.
TRINITY_DN76713_c2_g1	TRINITY_DN76713_c2_g1_i7	MAD55_ORYSJ^MAD55_ORYSJ^Q:812-501,H:134-245^46.4%ID^E:1.3e-15^RecName: Full=MADS-box transcription factor 55;^Eukaryota; Viridiplantae; Streptophyta; Embryophyta; Tracheophyta; Spermatophyta; Magnoliophyta; Liliopsida; Poales; Poaceae; BOP clade; Oryzoideae; Oryzeae; Oryzinae; Oryza; Oryza sativa	.	.	.	.	.	.	.	.	KEGG:osa:4340495	GO:0005634^cellular_component^nucleus`GO:0003700^molecular_function^DNA-binding transcription factor activity`GO:0046983^molecular_function^protein dimerization activity`GO:0000977^molecular_function^RNA polymerase II regulatory region sequence-specific DNA binding`GO:0045944^biological_process^positive regulation of transcription by RNA polymerase II`GO:0006351^biological_process^transcription, …	.	.	.
TRINITY_DN76713_c2_g1	TRINITY_DN76713_c2_g1_i4	MAD55_ORYSJ^MAD55_ORYSJ^Q:901-731,H:134-190^57.9%ID^E:4e-10^RecName: Full=MADS-box transcription factor 55;^Eukaryota; Viridiplantae; Streptophyta; Embryophyta; Tracheophyta; Spermatophyta; Magnoliophyta; Liliopsida; Poales; Poaceae; BOP clade; Oryzoideae; Oryzeae; Oryzinae; Oryza; Oryza sativa	.	TRINITY_DN76713_c2_g1_i4.p1	476-901[-]	MAD55_ORYSJ^MAD55_ORYSJ^Q:1-57,H:134-190^57.9%ID^E:1.9e-10^RecName: Full=MADS-box transcription factor 55;^Eukaryota; Viridiplantae; Streptophyta; Embryophyta; Tracheophyta; Spermatophyta; Magnoliophyta; Liliopsida; Poales; Poaceae; BOP clade; Oryzoideae; Oryzeae; Oryzinae; Oryza; Oryza sativa	PF01486.16^K-box^K-box region^2-58^E:2.7e-11	.	ExpAA=28.99^PredHel=1^Topology=i59-81o	.	KEGG:osa:4340495	GO:0005634^cellular_component^nucleus`GO:0003700^molecular_function^DNA-binding transcription factor activity`GO:0046983^molecular_function^protein dimerization activity`GO:0000977^molecular_function^RNA polymerase II regulatory region sequence-specific DNA binding`GO:0045944^biological_process^positive regulation of transcription by RNA polymerase II`GO:0006351^biological_process^transcription, …	GO:0003700^molecular_function^DNA-binding transcription factor activity`GO:0006355^biological_process^regulation of transcription, DNA-templated`GO:0005634^cellular_component^nucleus	.	.
TRINITY_DN76713_c2_g1	TRINITY_DN76713_c2_g1_i5	MAD55_ORYSJ^MAD55_ORYSJ^Q:333-76,H:134-243^42.7%ID^E:1.6e-12^RecName: Full=MADS-box transcription factor 55;^Eukaryota; Viridiplantae; Streptophyta; Embryophyta; Tracheophyta; Spermatophyta; Magnoliophyta; Liliopsida; Poales; Poaceae; BOP clade; Oryzoideae; Oryzeae; Oryzinae; Oryza; Oryza sativa	.	TRINITY_DN76713_c2_g1_i5.p1	1-333[-]	MAD55_ORYSJ^MAD55_ORYSJ^Q:1-86,H:134-243^42.7%ID^E:1.6e-12^RecName: Full=MADS-box transcription factor 55;^Eukaryota; Viridiplantae; Streptophyta; Embryophyta; Tracheophyta; Spermatophyta; Magnoliophyta; Liliopsida; Poales; Poaceae; BOP clade; Oryzoideae; Oryzeae; Oryzinae; Oryza; Oryza sativa	PF01486.16^K-box^K-box region^2-59^E:3.1e-11	.	.	.	KEGG:osa:4340495	GO:0005634^cellular_component^nucleus`GO:0003700^molecular_function^DNA-binding transcription factor activity`GO:0046983^molecular_function^protein dimerization activity`GO:0000977^molecular_function^RNA polymerase II regulatory region sequence-specific DNA binding`GO:0045944^biological_process^positive regulation of transcription by RNA polymerase II`GO:0006351^biological_process^transcription, …	GO:0003700^molecular_function^DNA-binding transcription factor activity`GO:0006355^biological_process^regulation of transcription, DNA-templated`GO:0005634^cellular_component^nucleus	.	.
TRINITY_DN76713_c2_g1	TRINITY_DN76713_c2_g1_i8	MAD55_ORYSJ^MAD55_ORYSJ^Q:338-78,H:134-244^43.2%ID^E:2.5e-13^RecName: Full=MADS-box transcription factor 55;^Eukaryota; Viridiplantae; Streptophyta; Embryophyta; Tracheophyta; Spermatophyta; Magnoliophyta; Liliopsida; Poales; Poaceae; BOP clade; Oryzoideae; Oryzeae; Oryzinae; Oryza; Oryza sativa	.	TRINITY_DN76713_c2_g1_i8.p1	3-338[-]	MAD55_ORYSJ^MAD55_ORYSJ^Q:1-87,H:134-244^43.2%ID^E:2.5e-13^RecName: Full=MADS-box transcription factor 55;^Eukaryota; Viridiplantae; Streptophyta; Embryophyta; Tracheophyta; Spermatophyta; Magnoliophyta; Liliopsida; Poales; Poaceae; BOP clade; Oryzoideae; Oryzeae; Oryzinae; Oryza; Oryza sativa	PF01486.16^K-box^K-box region^2-59^E:3.1e-11	.	.	.	KEGG:osa:4340495	GO:0005634^cellular_component^nucleus`GO:0003700^molecular_function^DNA-binding transcription factor activity`GO:0046983^molecular_function^protein dimerization activity`GO:0000977^molecular_function^RNA polymerase II regulatory region sequence-specific DNA binding`GO:0045944^biological_process^positive regulation of transcription by RNA polymerase II`GO:0006351^biological_process^transcription, …	GO:0003700^molecular_function^DNA-binding transcription factor activity`GO:0006355^biological_process^regulation of transcription, DNA-templated`GO:0005634^cellular_component^nucleus	.	.
TRINITY_DN76713_c2_g1	TRINITY_DN76713_c2_g1_i9	MAD55_ORYSJ^MAD55_ORYSJ^Q:792-622,H:134-190^57.9%ID^E:3.6e-10^RecName: Full=MADS-box transcription factor 55;^Eukaryota; Viridiplantae; Streptophyta; Embryophyta; Tracheophyta; Spermatophyta; Magnoliophyta; Liliopsida; Poales; Poaceae; BOP clade; Oryzoideae; Oryzeae; Oryzinae; Oryza; Oryza sativa	.	.	.	.	.	.	.	.	KEGG:osa:4340495	GO:0005634^cellular_component^nucleus`GO:0003700^molecular_function^DNA-binding transcription factor activity`GO:0046983^molecular_function^protein dimerization activity`GO:0000977^molecular_function^RNA polymerase II regulatory region sequence-specific DNA binding`GO:0045944^biological_process^positive regulation of transcription by RNA polymerase II`GO:0006351^biological_process^transcription, …	.	.	.
TRINITY_DN76713_c2_g1	TRINITY_DN76713_c2_g1_i10	MAD55_ORYSJ^MAD55_ORYSJ^Q:386-78,H:134-244^45.9%ID^E:5.2e-15^RecName: Full=MADS-box transcription factor 55;^Eukaryota; Viridiplantae; Streptophyta; Embryophyta; Tracheophyta; Spermatophyta; Magnoliophyta; Liliopsida; Poales; Poaceae; BOP clade; Oryzoideae; Oryzeae; Oryzinae; Oryza; Oryza sativa	.	.	.	.	.	.	.	.	KEGG:osa:4340495	GO:0005634^cellular_component^nucleus`GO:0003700^molecular_function^DNA-binding transcription factor activity`GO:0046983^molecular_function^protein dimerization activity`GO:0000977^molecular_function^RNA polymerase II regulatory region sequence-specific DNA binding`GO:0045944^biological_process^positive regulation of transcription by RNA polymerase II`GO:0006351^biological_process^transcription, …	.	.	.
TRINITY_DN76713_c2_g1	TRINITY_DN76713_c2_g1_i11	.	.	.	.	.	.	.	.	.	.	.	.	.	.
TRINITY_DN76713_c2_g1	TRINITY_DN76713_c2_g1_i12	MAD55_ORYSJ^MAD55_ORYSJ^Q:764-501,H:134-245^43.8%ID^E:6.7e-14^RecName: Full=MADS-box transcription factor 55;^Eukaryota; Viridiplantae; Streptophyta; Embryophyta; Tracheophyta; Spermatophyta; Magnoliophyta; Liliopsida; Poales; Poaceae; BOP clade; Oryzoideae; Oryzeae; Oryzinae; Oryza; Oryza sativa	.	.	.	.	.	.	.	.	KEGG:osa:4340495	GO:0005634^cellular_component^nucleus`GO:0003700^molecular_function^DNA-binding transcription factor activity`GO:0046983^molecular_function^protein dimerization activity`GO:0000977^molecular_function^RNA polymerase II regulatory region sequence-specific DNA binding`GO:0045944^biological_process^positive regulation of transcription by RNA polymerase II`GO:0006351^biological_process^transcription, …	.	.	.
TRINITY_DN76779_c0_g2	TRINITY_DN76779_c0_g2_i18	.	.	.	.	.	.	.	.	.	.	.	.	.	.
TRINITY_DN76779_c0_g2	TRINITY_DN76779_c0_g2_i11	NDK5_ARATH^NDK5_ARATH^Q:340-768,H:1-144^70.8%ID^E:5.3e-54^RecName: Full=Probable nucleoside diphosphate kinase 5;^Eukaryota; Viridiplantae; Streptophyta; Embryophyta; Tracheophyta; Spermatophyta; Magnoliophyta; eudicotyledons; Gunneridae; Pentapetalae; rosids; malvids; Brassicales; Brassicaceae; Camelineae; Arabidopsis	.	TRINITY_DN76779_c0_g2_i11.p1	154-771[+]	NDK5_ARATH^NDK5_ARATH^Q:63-205,H:1-144^70.8%ID^E:3.1e-54^RecName: Full=Probable nucleoside diphosphate kinase 5;^Eukaryota; Viridiplantae; Streptophyta; Embryophyta; Tracheophyta; Spermatophyta; Magnoliophyta; eudicotyledons; Gunneridae; Pentapetalae; rosids; malvids; Brassicales; Brassicaceae; Camelineae; Arabidopsis	PF00334.18^NDK^Nucleoside diphosphate kinase^58-192^E:3.1e-44	.	ExpAA=31.78^PredHel=2^Topology=i5-24o34-56i	COG0105^Major role in the synthesis of nucleoside triphosphates other than ATP. The ATP gamma phosphate is transferred to the NDP beta phosphate via a ping-pong mechanism, using a phosphorylated active-site intermediate (By similarity)	KEGG:ath:AT1G17410`KO:K20790	GO:0005622^cellular_component^intracellular`GO:0005524^molecular_function^ATP binding`GO:0004550^molecular_function^nucleoside diphosphate kinase activity`GO:0006241^biological_process^CTP biosynthetic process`GO:0006183^biological_process^GTP biosynthetic process`GO:0006228^biological_process^UTP biosynthetic process	.	.	.
TRINITY_DN76779_c0_g2	TRINITY_DN76779_c0_g2_i10	NDK5_ARATH^NDK5_ARATH^Q:312-740,H:1-144^70.8%ID^E:8.8e-54^RecName: Full=Probable nucleoside diphosphate kinase 5;^Eukaryota; Viridiplantae; Streptophyta; Embryophyta; Tracheophyta; Spermatophyta; Magnoliophyta; eudicotyledons; Gunneridae; Pentapetalae; rosids; malvids; Brassicales; Brassicaceae; Camelineae; Arabidopsis	.	TRINITY_DN76779_c0_g2_i10.p1	192-743[+]	NDK5_ARATH^NDK5_ARATH^Q:41-183,H:1-144^70.8%ID^E:2.1e-54^RecName: Full=Probable nucleoside diphosphate kinase 5;^Eukaryota; Viridiplantae; Streptophyta; Embryophyta; Tracheophyta; Spermatophyta; Magnoliophyta; eudicotyledons; Gunneridae; Pentapetalae; rosids; malvids; Brassicales; Brassicaceae; Camelineae; Arabidopsis	PF00334.18^NDK^Nucleoside diphosphate kinase^36-170^E:2.2e-44	sigP:1^27^0.814^YES	ExpAA=21.66^PredHel=1^Topology=i5-27o	COG0105^Major role in the synthesis of nucleoside triphosphates other than ATP. The ATP gamma phosphate is transferred to the NDP beta phosphate via a ping-pong mechanism, using a phosphorylated active-site intermediate (By similarity)	KEGG:ath:AT1G17410`KO:K20790	GO:0005622^cellular_component^intracellular`GO:0005524^molecular_function^ATP binding`GO:0004550^molecular_function^nucleoside diphosphate kinase activity`GO:0006241^biological_process^CTP biosynthetic process`GO:0006183^biological_process^GTP biosynthetic process`GO:0006228^biological_process^UTP biosynthetic process	.	.	.
TRINITY_DN76779_c0_g2	TRINITY_DN76779_c0_g2_i13	NDK5_ARATH^NDK5_ARATH^Q:340-768,H:1-144^70.8%ID^E:9e-54^RecName: Full=Probable nucleoside diphosphate kinase 5;^Eukaryota; Viridiplantae; Streptophyta; Embryophyta; Tracheophyta; Spermatophyta; Magnoliophyta; eudicotyledons; Gunneridae; Pentapetalae; rosids; malvids; Brassicales; Brassicaceae; Camelineae; Arabidopsis	.	TRINITY_DN76779_c0_g2_i13.p1	154-771[+]	NDK5_ARATH^NDK5_ARATH^Q:63-205,H:1-144^70.8%ID^E:2.4e-54^RecName: Full=Probable nucleoside diphosphate kinase 5;^Eukaryota; Viridiplantae; Streptophyta; Embryophyta; Tracheophyta; Spermatophyta; Magnoliophyta; eudicotyledons; Gunneridae; Pentapetalae; rosids; malvids; Brassicales; Brassicaceae; Camelineae; Arabidopsis	PF00334.18^NDK^Nucleoside diphosphate kinase^58-192^E:3.1e-44	.	ExpAA=31.78^PredHel=2^Topology=i5-24o34-56i	COG0105^Major role in the synthesis of nucleoside triphosphates other than ATP. The ATP gamma phosphate is transferred to the NDP beta phosphate via a ping-pong mechanism, using a phosphorylated active-site intermediate (By similarity)	KEGG:ath:AT1G17410`KO:K20790	GO:0005622^cellular_component^intracellular`GO:0005524^molecular_function^ATP binding`GO:0004550^molecular_function^nucleoside diphosphate kinase activity`GO:0006241^biological_process^CTP biosynthetic process`GO:0006183^biological_process^GTP biosynthetic process`GO:0006228^biological_process^UTP biosynthetic process	.	.	.
TRINITY_DN76779_c0_g2	TRINITY_DN76779_c0_g2_i12	NDK5_ARATH^NDK5_ARATH^Q:312-740,H:1-144^70.8%ID^E:3.7e-54^RecName: Full=Probable nucleoside diphosphate kinase 5;^Eukaryota; Viridiplantae; Streptophyta; Embryophyta; Tracheophyta; Spermatophyta; Magnoliophyta; eudicotyledons; Gunneridae; Pentapetalae; rosids; malvids; Brassicales; Brassicaceae; Camelineae; Arabidopsis	.	TRINITY_DN76779_c0_g2_i12.p1	192-743[+]	NDK5_ARATH^NDK5_ARATH^Q:41-183,H:1-144^70.8%ID^E:2.1e-54^RecName: Full=Probable nucleoside diphosphate kinase 5;^Eukaryota; Viridiplantae; Streptophyta; Embryophyta; Tracheophyta; Spermatophyta; Magnoliophyta; eudicotyledons; Gunneridae; Pentapetalae; rosids; malvids; Brassicales; Brassicaceae; Camelineae; Arabidopsis	PF00334.18^NDK^Nucleoside diphosphate kinase^36-170^E:2.2e-44	sigP:1^27^0.814^YES	ExpAA=21.66^PredHel=1^Topology=i5-27o	COG0105^Major role in the synthesis of nucleoside triphosphates other than ATP. The ATP gamma phosphate is transferred to the NDP beta phosphate via a ping-pong mechanism, using a phosphorylated active-site intermediate (By similarity)	KEGG:ath:AT1G17410`KO:K20790	GO:0005622^cellular_component^intracellular`GO:0005524^molecular_function^ATP binding`GO:0004550^molecular_function^nucleoside diphosphate kinase activity`GO:0006241^biological_process^CTP biosynthetic process`GO:0006183^biological_process^GTP biosynthetic process`GO:0006228^biological_process^UTP biosynthetic process	.	.	.
TRINITY_DN76779_c0_g2	TRINITY_DN76779_c0_g2_i15	NDK5_ARATH^NDK5_ARATH^Q:1269-1484,H:60-131^86.1%ID^E:2.2e-29^RecName: Full=Probable nucleoside diphosphate kinase 5;^Eukaryota; Viridiplantae; Streptophyta; Embryophyta; Tracheophyta; Spermatophyta; Magnoliophyta; eudicotyledons; Gunneridae; Pentapetalae; rosids; malvids; Brassicales; Brassicaceae; Camelineae; Arabidopsis`NDK5_ARATH^NDK5_ARATH^Q:340-531,H:1-64^56.2%ID^E:1e-13^RecName: Full=Probab…	.	TRINITY_DN76779_c0_g2_i15.p1	154-594[+]	NDK_PSYA2^NDK_PSYA2^Q:55-126,H:1-72^43.1%ID^E:1.3e-09^RecName: Full=Nucleoside diphosphate kinase {ECO:0000255|HAMAP-Rule:MF_00451};^Bacteria; Proteobacteria; Gammaproteobacteria; Pseudomonadales; Moraxellaceae; Psychrobacter	PF00334.18^NDK^Nucleoside diphosphate kinase^58-130^E:1.8e-16	.	ExpAA=40.59^PredHel=2^Topology=i5-24o34-56i	COG0105^Major role in the synthesis of nucleoside triphosphates other than ATP. The ATP gamma phosphate is transferred to the NDP beta phosphate via a ping-pong mechanism, using a phosphorylated active-site intermediate (By similarity)	KEGG:par:Psyc_0678`KO:K00940	GO:0005737^cellular_component^cytoplasm`GO:0005524^molecular_function^ATP binding`GO:0046872^molecular_function^metal ion binding`GO:0004550^molecular_function^nucleoside diphosphate kinase activity`GO:0006241^biological_process^CTP biosynthetic process`GO:0006183^biological_process^GTP biosynthetic process`GO:0006228^biological_process^UTP biosynthetic process	.	.	.
TRINITY_DN76779_c0_g2	TRINITY_DN76779_c0_g2_i17	NDK5_ARATH^NDK5_ARATH^Q:340-768,H:1-144^70.8%ID^E:3.8e-54^RecName: Full=Probable nucleoside diphosphate kinase 5;^Eukaryota; Viridiplantae; Streptophyta; Embryophyta; Tracheophyta; Spermatophyta; Magnoliophyta; eudicotyledons; Gunneridae; Pentapetalae; rosids; malvids; Brassicales; Brassicaceae; Camelineae; Arabidopsis	.	TRINITY_DN76779_c0_g2_i17.p1	154-771[+]	NDK5_ARATH^NDK5_ARATH^Q:63-205,H:1-144^70.8%ID^E:2.4e-54^RecName: Full=Probable nucleoside diphosphate kinase 5;^Eukaryota; Viridiplantae; Streptophyta; Embryophyta; Tracheophyta; Spermatophyta; Magnoliophyta; eudicotyledons; Gunneridae; Pentapetalae; rosids; malvids; Brassicales; Brassicaceae; Camelineae; Arabidopsis	PF00334.18^NDK^Nucleoside diphosphate kinase^58-192^E:3.1e-44	.	ExpAA=31.78^PredHel=2^Topology=i5-24o34-56i	COG0105^Major role in the synthesis of nucleoside triphosphates other than ATP. The ATP gamma phosphate is transferred to the NDP beta phosphate via a ping-pong mechanism, using a phosphorylated active-site intermediate (By similarity)	KEGG:ath:AT1G17410`KO:K20790	GO:0005622^cellular_component^intracellular`GO:0005524^molecular_function^ATP binding`GO:0004550^molecular_function^nucleoside diphosphate kinase activity`GO:0006241^biological_process^CTP biosynthetic process`GO:0006183^biological_process^GTP biosynthetic process`GO:0006228^biological_process^UTP biosynthetic process	.	.	.
TRINITY_DN76779_c0_g2	TRINITY_DN76779_c0_g2_i16	NDK5_ARATH^NDK5_ARATH^Q:1241-1456,H:60-131^86.1%ID^E:2.2e-29^RecName: Full=Probable nucleoside diphosphate kinase 5;^Eukaryota; Viridiplantae; Streptophyta; Embryophyta; Tracheophyta; Spermatophyta; Magnoliophyta; eudicotyledons; Gunneridae; Pentapetalae; rosids; malvids; Brassicales; Brassicaceae; Camelineae; Arabidopsis`NDK5_ARATH^NDK5_ARATH^Q:312-503,H:1-64^56.2%ID^E:9.8e-14^RecName: Full=Prob…	.	TRINITY_DN76779_c0_g2_i16.p1	192-566[+]	NDK_PSYA2^NDK_PSYA2^Q:33-104,H:1-72^43.1%ID^E:1.1e-09^RecName: Full=Nucleoside diphosphate kinase {ECO:0000255|HAMAP-Rule:MF_00451};^Bacteria; Proteobacteria; Gammaproteobacteria; Pseudomonadales; Moraxellaceae; Psychrobacter	PF00334.18^NDK^Nucleoside diphosphate kinase^36-108^E:1.2e-16	sigP:1^27^0.814^YES	ExpAA=31.49^PredHel=1^Topology=o5-27i	COG0105^Major role in the synthesis of nucleoside triphosphates other than ATP. The ATP gamma phosphate is transferred to the NDP beta phosphate via a ping-pong mechanism, using a phosphorylated active-site intermediate (By similarity)	KEGG:par:Psyc_0678`KO:K00940	GO:0005737^cellular_component^cytoplasm`GO:0005524^molecular_function^ATP binding`GO:0046872^molecular_function^metal ion binding`GO:0004550^molecular_function^nucleoside diphosphate kinase activity`GO:0006241^biological_process^CTP biosynthetic process`GO:0006183^biological_process^GTP biosynthetic process`GO:0006228^biological_process^UTP biosynthetic process	.	.	.
TRINITY_DN76779_c0_g2	TRINITY_DN76779_c0_g2_i9	NDK5_ARATH^NDK5_ARATH^Q:2-211,H:62-131^85.7%ID^E:6.6e-29^RecName: Full=Probable nucleoside diphosphate kinase 5;^Eukaryota; Viridiplantae; Streptophyta; Embryophyta; Tracheophyta; Spermatophyta; Magnoliophyta; eudicotyledons; Gunneridae; Pentapetalae; rosids; malvids; Brassicales; Brassicaceae; Camelineae; Arabidopsis	.	TRINITY_DN76779_c0_g2_i9.p1	2-316[+]	NDK5_ARATH^NDK5_ARATH^Q:1-70,H:62-131^85.7%ID^E:5.2e-29^RecName: Full=Probable nucleoside diphosphate kinase 5;^Eukaryota; Viridiplantae; Streptophyta; Embryophyta; Tracheophyta; Spermatophyta; Magnoliophyta; eudicotyledons; Gunneridae; Pentapetalae; rosids; malvids; Brassicales; Brassicaceae; Camelineae; Arabidopsis	PF00334.18^NDK^Nucleoside diphosphate kinase^1-69^E:2.8e-21	.	.	COG0105^Major role in the synthesis of nucleoside triphosphates other than ATP. The ATP gamma phosphate is transferred to the NDP beta phosphate via a ping-pong mechanism, using a phosphorylated active-site intermediate (By similarity)	KEGG:ath:AT1G17410`KO:K20790	GO:0005622^cellular_component^intracellular`GO:0005524^molecular_function^ATP binding`GO:0004550^molecular_function^nucleoside diphosphate kinase activity`GO:0006241^biological_process^CTP biosynthetic process`GO:0006183^biological_process^GTP biosynthetic process`GO:0006228^biological_process^UTP biosynthetic process	.	.	.
TRINITY_DN76779_c0_g2	TRINITY_DN76779_c0_g2_i8	NDK5_ARATH^NDK5_ARATH^Q:340-768,H:1-144^70.8%ID^E:5.3e-54^RecName: Full=Probable nucleoside diphosphate kinase 5;^Eukaryota; Viridiplantae; Streptophyta; Embryophyta; Tracheophyta; Spermatophyta; Magnoliophyta; eudicotyledons; Gunneridae; Pentapetalae; rosids; malvids; Brassicales; Brassicaceae; Camelineae; Arabidopsis	.	TRINITY_DN76779_c0_g2_i8.p1	154-771[+]	NDK5_ARATH^NDK5_ARATH^Q:63-205,H:1-144^70.8%ID^E:3.1e-54^RecName: Full=Probable nucleoside diphosphate kinase 5;^Eukaryota; Viridiplantae; Streptophyta; Embryophyta; Tracheophyta; Spermatophyta; Magnoliophyta; eudicotyledons; Gunneridae; Pentapetalae; rosids; malvids; Brassicales; Brassicaceae; Camelineae; Arabidopsis	PF00334.18^NDK^Nucleoside diphosphate kinase^58-192^E:3.1e-44	.	ExpAA=31.78^PredHel=2^Topology=i5-24o34-56i	COG0105^Major role in the synthesis of nucleoside triphosphates other than ATP. The ATP gamma phosphate is transferred to the NDP beta phosphate via a ping-pong mechanism, using a phosphorylated active-site intermediate (By similarity)	KEGG:ath:AT1G17410`KO:K20790	GO:0005622^cellular_component^intracellular`GO:0005524^molecular_function^ATP binding`GO:0004550^molecular_function^nucleoside diphosphate kinase activity`GO:0006241^biological_process^CTP biosynthetic process`GO:0006183^biological_process^GTP biosynthetic process`GO:0006228^biological_process^UTP biosynthetic process	.	.	.
TRINITY_DN76779_c0_g2	TRINITY_DN76779_c0_g2_i1	NDK5_ARATH^NDK5_ARATH^Q:393-821,H:1-144^70.8%ID^E:5.1e-54^RecName: Full=Probable nucleoside diphosphate kinase 5;^Eukaryota; Viridiplantae; Streptophyta; Embryophyta; Tracheophyta; Spermatophyta; Magnoliophyta; eudicotyledons; Gunneridae; Pentapetalae; rosids; malvids; Brassicales; Brassicaceae; Camelineae; Arabidopsis	.	TRINITY_DN76779_c0_g2_i1.p1	3-824[+]	NDK5_ARATH^NDK5_ARATH^Q:131-273,H:1-144^70.8%ID^E:3.2e-54^RecName: Full=Probable nucleoside diphosphate kinase 5;^Eukaryota; Viridiplantae; Streptophyta; Embryophyta; Tracheophyta; Spermatophyta; Magnoliophyta; eudicotyledons; Gunneridae; Pentapetalae; rosids; malvids; Brassicales; Brassicaceae; Camelineae; Arabidopsis	PF00334.18^NDK^Nucleoside diphosphate kinase^126-260^E:6.9e-44	.	ExpAA=22.01^PredHel=1^Topology=i92-114o	COG0105^Major role in the synthesis of nucleoside triphosphates other than ATP. The ATP gamma phosphate is transferred to the NDP beta phosphate via a ping-pong mechanism, using a phosphorylated active-site intermediate (By similarity)	KEGG:ath:AT1G17410`KO:K20790	GO:0005622^cellular_component^intracellular`GO:0005524^molecular_function^ATP binding`GO:0004550^molecular_function^nucleoside diphosphate kinase activity`GO:0006241^biological_process^CTP biosynthetic process`GO:0006183^biological_process^GTP biosynthetic process`GO:0006228^biological_process^UTP biosynthetic process	.	.	.
TRINITY_DN76779_c0_g2	TRINITY_DN76779_c0_g2_i5	.	.	.	.	.	.	.	.	.	.	.	.	.	.
TRINITY_DN76779_c0_g2	TRINITY_DN76779_c0_g2_i4	NDK5_ARATH^NDK5_ARATH^Q:312-740,H:1-144^70.8%ID^E:5.2e-54^RecName: Full=Probable nucleoside diphosphate kinase 5;^Eukaryota; Viridiplantae; Streptophyta; Embryophyta; Tracheophyta; Spermatophyta; Magnoliophyta; eudicotyledons; Gunneridae; Pentapetalae; rosids; malvids; Brassicales; Brassicaceae; Camelineae; Arabidopsis	.	TRINITY_DN76779_c0_g2_i4.p1	192-743[+]	NDK5_ARATH^NDK5_ARATH^Q:41-183,H:1-144^70.8%ID^E:2.8e-54^RecName: Full=Probable nucleoside diphosphate kinase 5;^Eukaryota; Viridiplantae; Streptophyta; Embryophyta; Tracheophyta; Spermatophyta; Magnoliophyta; eudicotyledons; Gunneridae; Pentapetalae; rosids; malvids; Brassicales; Brassicaceae; Camelineae; Arabidopsis	PF00334.18^NDK^Nucleoside diphosphate kinase^36-170^E:2.2e-44	sigP:1^27^0.814^YES	ExpAA=21.66^PredHel=1^Topology=i5-27o	COG0105^Major role in the synthesis of nucleoside triphosphates other than ATP. The ATP gamma phosphate is transferred to the NDP beta phosphate via a ping-pong mechanism, using a phosphorylated active-site intermediate (By similarity)	KEGG:ath:AT1G17410`KO:K20790	GO:0005622^cellular_component^intracellular`GO:0005524^molecular_function^ATP binding`GO:0004550^molecular_function^nucleoside diphosphate kinase activity`GO:0006241^biological_process^CTP biosynthetic process`GO:0006183^biological_process^GTP biosynthetic process`GO:0006228^biological_process^UTP biosynthetic process	.	.	.
TRINITY_DN76779_c0_g2	TRINITY_DN76779_c0_g2_i7	NDK5_ARATH^NDK5_ARATH^Q:340-768,H:1-144^70.8%ID^E:9e-54^RecName: Full=Probable nucleoside diphosphate kinase 5;^Eukaryota; Viridiplantae; Streptophyta; Embryophyta; Tracheophyta; Spermatophyta; Magnoliophyta; eudicotyledons; Gunneridae; Pentapetalae; rosids; malvids; Brassicales; Brassicaceae; Camelineae; Arabidopsis	.	TRINITY_DN76779_c0_g2_i7.p1	154-771[+]	NDK5_ARATH^NDK5_ARATH^Q:63-205,H:1-144^70.8%ID^E:2.4e-54^RecName: Full=Probable nucleoside diphosphate kinase 5;^Eukaryota; Viridiplantae; Streptophyta; Embryophyta; Tracheophyta; Spermatophyta; Magnoliophyta; eudicotyledons; Gunneridae; Pentapetalae; rosids; malvids; Brassicales; Brassicaceae; Camelineae; Arabidopsis	PF00334.18^NDK^Nucleoside diphosphate kinase^58-192^E:3.1e-44	.	ExpAA=31.78^PredHel=2^Topology=i5-24o34-56i	COG0105^Major role in the synthesis of nucleoside triphosphates other than ATP. The ATP gamma phosphate is transferred to the NDP beta phosphate via a ping-pong mechanism, using a phosphorylated active-site intermediate (By similarity)	KEGG:ath:AT1G17410`KO:K20790	GO:0005622^cellular_component^intracellular`GO:0005524^molecular_function^ATP binding`GO:0004550^molecular_function^nucleoside diphosphate kinase activity`GO:0006241^biological_process^CTP biosynthetic process`GO:0006183^biological_process^GTP biosynthetic process`GO:0006228^biological_process^UTP biosynthetic process	.	.	.
TRINITY_DN76779_c0_g2	TRINITY_DN76779_c0_g2_i6	NDK5_ARATH^NDK5_ARATH^Q:312-740,H:1-144^70.8%ID^E:8.8e-54^RecName: Full=Probable nucleoside diphosphate kinase 5;^Eukaryota; Viridiplantae; Streptophyta; Embryophyta; Tracheophyta; Spermatophyta; Magnoliophyta; eudicotyledons; Gunneridae; Pentapetalae; rosids; malvids; Brassicales; Brassicaceae; Camelineae; Arabidopsis	.	TRINITY_DN76779_c0_g2_i6.p1	192-743[+]	NDK5_ARATH^NDK5_ARATH^Q:41-183,H:1-144^70.8%ID^E:2.1e-54^RecName: Full=Probable nucleoside diphosphate kinase 5;^Eukaryota; Viridiplantae; Streptophyta; Embryophyta; Tracheophyta; Spermatophyta; Magnoliophyta; eudicotyledons; Gunneridae; Pentapetalae; rosids; malvids; Brassicales; Brassicaceae; Camelineae; Arabidopsis	PF00334.18^NDK^Nucleoside diphosphate kinase^36-170^E:2.2e-44	sigP:1^27^0.814^YES	ExpAA=21.66^PredHel=1^Topology=i5-27o	COG0105^Major role in the synthesis of nucleoside triphosphates other than ATP. The ATP gamma phosphate is transferred to the NDP beta phosphate via a ping-pong mechanism, using a phosphorylated active-site intermediate (By similarity)	KEGG:ath:AT1G17410`KO:K20790	GO:0005622^cellular_component^intracellular`GO:0005524^molecular_function^ATP binding`GO:0004550^molecular_function^nucleoside diphosphate kinase activity`GO:0006241^biological_process^CTP biosynthetic process`GO:0006183^biological_process^GTP biosynthetic process`GO:0006228^biological_process^UTP biosynthetic process	.	.	.
TRINITY_DN76737_c0_g1	TRINITY_DN76737_c0_g1_i4	ECHB_MACFA^ECHB_MACFA^Q:2533-1253,H:47-474^66.4%ID^E:1.9e-159^RecName: Full=Trifunctional enzyme subunit beta, mitochondrial;^Eukaryota; Metazoa; Chordata; Craniata; Vertebrata; Euteleostomi; Mammalia; Eutheria; Euarchontoglires; Primates; Haplorrhini; Catarrhini; Cercopithecidae; Cercopithecinae; Macaca	.	TRINITY_DN76737_c0_g1_i4.p1	1238-2641[-]	ECHB_MACFA^ECHB_MACFA^Q:37-463,H:47-474^66.4%ID^E:9.6e-160^RecName: Full=Trifunctional enzyme subunit beta, mitochondrial;^Eukaryota; Metazoa; Chordata; Craniata; Vertebrata; Euteleostomi; Mammalia; Eutheria; Euarchontoglires; Primates; Haplorrhini; Catarrhini; Cercopithecidae; Cercopithecinae; Macaca	PF00108.22^Thiolase_N^Thiolase, N-terminal domain^45-314^E:1.8e-74`PF00109.25^ketoacyl-synt^Beta-ketoacyl synthase, N-terminal domain^119-179^E:6.3e-05`PF02803.17^Thiolase_C^Thiolase, C-terminal domain^321-461^E:3.5e-42	.	.	.	KEGG:mcf:102143422`KO:K07509	GO:0005783^cellular_component^endoplasmic reticulum`GO:0005743^cellular_component^mitochondrial inner membrane`GO:0005741^cellular_component^mitochondrial outer membrane`GO:0003988^molecular_function^acetyl-CoA C-acyltransferase activity`GO:0006635^biological_process^fatty acid beta-oxidation	GO:0016747^molecular_function^transferase activity, transferring acyl groups other than amino-acyl groups`GO:0008152^biological_process^metabolic process	.	.
TRINITY_DN76737_c0_g1	TRINITY_DN76737_c0_g1_i5	.	.	.	.	.	.	.	.	.	.	.	.	.	.
TRINITY_DN76737_c0_g1	TRINITY_DN76737_c0_g1_i6	.	.	.	.	.	.	.	.	.	.	.	.	.	.
TRINITY_DN76737_c0_g1	TRINITY_DN76737_c0_g1_i7	EXOS4_BOVIN^EXOS4_BOVIN^Q:220-960,H:13-236^47%ID^E:9e-52^RecName: Full=Exosome complex component RRP41;^Eukaryota; Metazoa; Chordata; Craniata; Vertebrata; Euteleostomi; Mammalia; Eutheria; Laurasiatheria; Cetartiodactyla; Ruminantia; Pecora; Bovidae; Bovinae; Bos	.	TRINITY_DN76737_c0_g1_i7.p1	178-999[+]	EXOS4_BOVIN^EXOS4_BOVIN^Q:15-261,H:13-236^47%ID^E:1.1e-51^RecName: Full=Exosome complex component RRP41;^Eukaryota; Metazoa; Chordata; Craniata; Vertebrata; Euteleostomi; Mammalia; Eutheria; Laurasiatheria; Cetartiodactyla; Ruminantia; Pecora; Bovidae; Bovinae; Bos	PF01138.20^RNase_PH^3' exoribonuclease family, domain 1^23-158^E:2.3e-30	.	.	COG0689^Phosphorolytic exoribonuclease that removes nucleotide residues following the -CCA terminus of tRNA and adds nucleotides to the ends of RNA molecules by using nucleoside diphosphates as substrates (By similarity)	KEGG:bta:618292`KO:K11600	GO:0000177^cellular_component^cytoplasmic exosome (RNase complex)`GO:0005829^cellular_component^cytosol`GO:0000178^cellular_component^exosome (RNase complex)`GO:0045111^cellular_component^intermediate filament cytoskeleton`GO:0000176^cellular_component^nuclear exosome (RNase complex)`GO:0005730^cellular_component^nucleolus`GO:0035327^cellular_component^transcriptionally active chromatin`GO:001709…	.	.	.
TRINITY_DN76737_c0_g1	TRINITY_DN76737_c0_g1_i1	EXOS4_BOVIN^EXOS4_BOVIN^Q:220-960,H:13-236^47%ID^E:2e-51^RecName: Full=Exosome complex component RRP41;^Eukaryota; Metazoa; Chordata; Craniata; Vertebrata; Euteleostomi; Mammalia; Eutheria; Laurasiatheria; Cetartiodactyla; Ruminantia; Pecora; Bovidae; Bovinae; Bos	.	TRINITY_DN76737_c0_g1_i1.p1	178-1020[+]	EXOS4_BOVIN^EXOS4_BOVIN^Q:15-261,H:13-236^47%ID^E:1.5e-51^RecName: Full=Exosome complex component RRP41;^Eukaryota; Metazoa; Chordata; Craniata; Vertebrata; Euteleostomi; Mammalia; Eutheria; Laurasiatheria; Cetartiodactyla; Ruminantia; Pecora; Bovidae; Bovinae; Bos	PF01138.20^RNase_PH^3' exoribonuclease family, domain 1^23-158^E:2.5e-30	.	.	COG0689^Phosphorolytic exoribonuclease that removes nucleotide residues following the -CCA terminus of tRNA and adds nucleotides to the ends of RNA molecules by using nucleoside diphosphates as substrates (By similarity)	KEGG:bta:618292`KO:K11600	GO:0000177^cellular_component^cytoplasmic exosome (RNase complex)`GO:0005829^cellular_component^cytosol`GO:0000178^cellular_component^exosome (RNase complex)`GO:0045111^cellular_component^intermediate filament cytoskeleton`GO:0000176^cellular_component^nuclear exosome (RNase complex)`GO:0005730^cellular_component^nucleolus`GO:0035327^cellular_component^transcriptionally active chromatin`GO:001709…	.	.	.
TRINITY_DN76737_c0_g1	TRINITY_DN76737_c0_g1_i2	ECHB_MACFA^ECHB_MACFA^Q:2445-1159,H:47-474^66.7%ID^E:6.3e-160^RecName: Full=Trifunctional enzyme subunit beta, mitochondrial;^Eukaryota; Metazoa; Chordata; Craniata; Vertebrata; Euteleostomi; Mammalia; Eutheria; Euarchontoglires; Primates; Haplorrhini; Catarrhini; Cercopithecidae; Cercopithecinae; Macaca	.	TRINITY_DN76737_c0_g1_i2.p1	1144-2553[-]	ECHB_MACFA^ECHB_MACFA^Q:37-465,H:47-474^66.7%ID^E:2.5e-160^RecName: Full=Trifunctional enzyme subunit beta, mitochondrial;^Eukaryota; Metazoa; Chordata; Craniata; Vertebrata; Euteleostomi; Mammalia; Eutheria; Euarchontoglires; Primates; Haplorrhini; Catarrhini; Cercopithecidae; Cercopithecinae; Macaca	PF00108.22^Thiolase_N^Thiolase, N-terminal domain^45-316^E:7.3e-75`PF00109.25^ketoacyl-synt^Beta-ketoacyl synthase, N-terminal domain^119-179^E:6.3e-05`PF02803.17^Thiolase_C^Thiolase, C-terminal domain^324-463^E:5e-42	.	.	.	KEGG:mcf:102143422`KO:K07509	GO:0005783^cellular_component^endoplasmic reticulum`GO:0005743^cellular_component^mitochondrial inner membrane`GO:0005741^cellular_component^mitochondrial outer membrane`GO:0003988^molecular_function^acetyl-CoA C-acyltransferase activity`GO:0006635^biological_process^fatty acid beta-oxidation	GO:0016747^molecular_function^transferase activity, transferring acyl groups other than amino-acyl groups`GO:0008152^biological_process^metabolic process	.	.
TRINITY_DN76737_c0_g1	TRINITY_DN76737_c0_g1_i3	ECHB_MACFA^ECHB_MACFA^Q:2533-1247,H:47-474^66.7%ID^E:6.5e-160^RecName: Full=Trifunctional enzyme subunit beta, mitochondrial;^Eukaryota; Metazoa; Chordata; Craniata; Vertebrata; Euteleostomi; Mammalia; Eutheria; Euarchontoglires; Primates; Haplorrhini; Catarrhini; Cercopithecidae; Cercopithecinae; Macaca	.	TRINITY_DN76737_c0_g1_i3.p1	1232-2641[-]	ECHB_MACFA^ECHB_MACFA^Q:37-465,H:47-474^66.7%ID^E:2.5e-160^RecName: Full=Trifunctional enzyme subunit beta, mitochondrial;^Eukaryota; Metazoa; Chordata; Craniata; Vertebrata; Euteleostomi; Mammalia; Eutheria; Euarchontoglires; Primates; Haplorrhini; Catarrhini; Cercopithecidae; Cercopithecinae; Macaca	PF00108.22^Thiolase_N^Thiolase, N-terminal domain^45-316^E:7.3e-75`PF00109.25^ketoacyl-synt^Beta-ketoacyl synthase, N-terminal domain^119-179^E:6.3e-05`PF02803.17^Thiolase_C^Thiolase, C-terminal domain^324-463^E:5e-42	.	.	.	KEGG:mcf:102143422`KO:K07509	GO:0005783^cellular_component^endoplasmic reticulum`GO:0005743^cellular_component^mitochondrial inner membrane`GO:0005741^cellular_component^mitochondrial outer membrane`GO:0003988^molecular_function^acetyl-CoA C-acyltransferase activity`GO:0006635^biological_process^fatty acid beta-oxidation	GO:0016747^molecular_function^transferase activity, transferring acyl groups other than amino-acyl groups`GO:0008152^biological_process^metabolic process	.	.
TRINITY_DN76737_c0_g1	TRINITY_DN76737_c0_g1_i8	EXOS4_BOVIN^EXOS4_BOVIN^Q:220-960,H:13-236^47%ID^E:1.2e-51^RecName: Full=Exosome complex component RRP41;^Eukaryota; Metazoa; Chordata; Craniata; Vertebrata; Euteleostomi; Mammalia; Eutheria; Laurasiatheria; Cetartiodactyla; Ruminantia; Pecora; Bovidae; Bovinae; Bos	.	TRINITY_DN76737_c0_g1_i8.p1	178-993[+]	EXOS4_BOVIN^EXOS4_BOVIN^Q:15-261,H:13-236^47%ID^E:1.1e-51^RecName: Full=Exosome complex component RRP41;^Eukaryota; Metazoa; Chordata; Craniata; Vertebrata; Euteleostomi; Mammalia; Eutheria; Laurasiatheria; Cetartiodactyla; Ruminantia; Pecora; Bovidae; Bovinae; Bos	PF01138.20^RNase_PH^3' exoribonuclease family, domain 1^23-158^E:2.3e-30	.	.	COG0689^Phosphorolytic exoribonuclease that removes nucleotide residues following the -CCA terminus of tRNA and adds nucleotides to the ends of RNA molecules by using nucleoside diphosphates as substrates (By similarity)	KEGG:bta:618292`KO:K11600	GO:0000177^cellular_component^cytoplasmic exosome (RNase complex)`GO:0005829^cellular_component^cytosol`GO:0000178^cellular_component^exosome (RNase complex)`GO:0045111^cellular_component^intermediate filament cytoskeleton`GO:0000176^cellular_component^nuclear exosome (RNase complex)`GO:0005730^cellular_component^nucleolus`GO:0035327^cellular_component^transcriptionally active chromatin`GO:001709…	.	.	.
TRINITY_DN76737_c0_g1	TRINITY_DN76737_c0_g1_i9	.	.	.	.	.	.	.	.	.	.	.	.	.	.
TRINITY_DN76721_c2_g1	TRINITY_DN76721_c2_g1_i2	DIRL1_ARATH^DIRL1_ARATH^Q:3095-3319,H:26-102^40.3%ID^E:2.2e-09^RecName: Full=Putative lipid-transfer protein DIR1;^Eukaryota; Viridiplantae; Streptophyta; Embryophyta; Tracheophyta; Spermatophyta; Magnoliophyta; eudicotyledons; Gunneridae; Pentapetalae; rosids; malvids; Brassicales; Brassicaceae; Camelineae; Arabidopsis	.	TRINITY_DN76721_c2_g1_i2.p3	1791-2150[+]	UAF30_YEAST^UAF30_YEAST^Q:16-114,H:95-192^33.7%ID^E:2.9e-07^RecName: Full=Upstream activation factor subunit UAF30;^Eukaryota; Fungi; Dikarya; Ascomycota; Saccharomycotina; Saccharomycetes; Saccharomycetales; Saccharomycetaceae; Saccharomyces	PF02201.17^SWIB^SWIB/MDM2 domain^44-114^E:3e-19	.	.	.	KEGG:sce:YOR295W`KO:K15223	GO:0005730^cellular_component^nucleolus`GO:0000500^cellular_component^RNA polymerase I upstream activating factor complex`GO:0001165^molecular_function^RNA polymerase I upstream control element sequence-specific DNA binding`GO:0001181^molecular_function^RNA polymerase I general transcription initiation factor activity`GO:0006325^biological_process^chromatin organization`GO:0042790^biological_proc…	GO:0005515^molecular_function^protein binding	.	.
TRINITY_DN76721_c2_g1	TRINITY_DN76721_c2_g1_i1	UAF30_YEAST^UAF30_YEAST^Q:366-599,H:126-200^46.2%ID^E:2.3e-13^RecName: Full=Upstream activation factor subunit UAF30;^Eukaryota; Fungi; Dikarya; Ascomycota; Saccharomycotina; Saccharomycetes; Saccharomycetales; Saccharomycetaceae; Saccharomyces	.	TRINITY_DN76721_c2_g1_i1.p1	3-896[+]	UAF30_YEAST^UAF30_YEAST^Q:122-199,H:126-200^46.2%ID^E:2.3e-13^RecName: Full=Upstream activation factor subunit UAF30;^Eukaryota; Fungi; Dikarya; Ascomycota; Saccharomycotina; Saccharomycetes; Saccharomycetales; Saccharomycetaceae; Saccharomyces	PF02201.17^SWIB^SWIB/MDM2 domain^119-190^E:1.4e-27`PF02201.17^SWIB^SWIB/MDM2 domain^222-292^E:2.3e-18	.	.	.	KEGG:sce:YOR295W`KO:K15223	GO:0005730^cellular_component^nucleolus`GO:0000500^cellular_component^RNA polymerase I upstream activating factor complex`GO:0001165^molecular_function^RNA polymerase I upstream control element sequence-specific DNA binding`GO:0001181^molecular_function^RNA polymerase I general transcription initiation factor activity`GO:0006325^biological_process^chromatin organization`GO:0042790^biological_proc…	GO:0005515^molecular_function^protein binding	.	.
TRINITY_DN76721_c2_g1	TRINITY_DN76721_c2_g1_i6	UAF30_SCHPO^UAF30_SCHPO^Q:1671-1814,H:140-187^58.3%ID^E:4.1e-09^RecName: Full=Upstream activation factor subunit spp27;^Eukaryota; Fungi; Dikarya; Ascomycota; Taphrinomycotina; Schizosaccharomycetes; Schizosaccharomycetales; Schizosaccharomycetaceae; Schizosaccharomyces	.	TRINITY_DN76721_c2_g1_i6.p3	1957-2271[+]	UAF30_YEAST^UAF30_YEAST^Q:4-99,H:96-192^33%ID^E:7.3e-07^RecName: Full=Upstream activation factor subunit UAF30;^Eukaryota; Fungi; Dikarya; Ascomycota; Saccharomycotina; Saccharomycetes; Saccharomycetales; Saccharomycetaceae; Saccharomyces	PF02201.17^SWIB^SWIB/MDM2 domain^29-99^E:2e-19	.	.	.	KEGG:sce:YOR295W`KO:K15223	GO:0005730^cellular_component^nucleolus`GO:0000500^cellular_component^RNA polymerase I upstream activating factor complex`GO:0001165^molecular_function^RNA polymerase I upstream control element sequence-specific DNA binding`GO:0001181^molecular_function^RNA polymerase I general transcription initiation factor activity`GO:0006325^biological_process^chromatin organization`GO:0042790^biological_proc…	GO:0005515^molecular_function^protein binding	.	.
TRINITY_DN76721_c2_g1	TRINITY_DN76721_c2_g1_i7	UAF30_SCHPO^UAF30_SCHPO^Q:1671-1814,H:140-187^58.3%ID^E:3.1e-09^RecName: Full=Upstream activation factor subunit spp27;^Eukaryota; Fungi; Dikarya; Ascomycota; Taphrinomycotina; Schizosaccharomycetes; Schizosaccharomycetales; Schizosaccharomycetaceae; Schizosaccharomyces	.	TRINITY_DN76721_c2_g1_i7.p3	1791-2150[+]	UAF30_YEAST^UAF30_YEAST^Q:16-114,H:95-192^33.7%ID^E:2.9e-07^RecName: Full=Upstream activation factor subunit UAF30;^Eukaryota; Fungi; Dikarya; Ascomycota; Saccharomycotina; Saccharomycetes; Saccharomycetales; Saccharomycetaceae; Saccharomyces	PF02201.17^SWIB^SWIB/MDM2 domain^44-114^E:3e-19	.	.	.	KEGG:sce:YOR295W`KO:K15223	GO:0005730^cellular_component^nucleolus`GO:0000500^cellular_component^RNA polymerase I upstream activating factor complex`GO:0001165^molecular_function^RNA polymerase I upstream control element sequence-specific DNA binding`GO:0001181^molecular_function^RNA polymerase I general transcription initiation factor activity`GO:0006325^biological_process^chromatin organization`GO:0042790^biological_proc…	GO:0005515^molecular_function^protein binding	.	.
TRINITY_DN76721_c2_g1	TRINITY_DN76721_c2_g1_i5	UAF30_YEAST^UAF30_YEAST^Q:384-617,H:126-200^46.2%ID^E:2.4e-13^RecName: Full=Upstream activation factor subunit UAF30;^Eukaryota; Fungi; Dikarya; Ascomycota; Saccharomycotina; Saccharomycetes; Saccharomycetales; Saccharomycetaceae; Saccharomyces	.	TRINITY_DN76721_c2_g1_i5.p1	3-914[+]	UAF30_YEAST^UAF30_YEAST^Q:128-205,H:126-200^46.2%ID^E:2.3e-13^RecName: Full=Upstream activation factor subunit UAF30;^Eukaryota; Fungi; Dikarya; Ascomycota; Saccharomycotina; Saccharomycetes; Saccharomycetales; Saccharomycetaceae; Saccharomyces	PF02201.17^SWIB^SWIB/MDM2 domain^125-196^E:1.4e-27`PF02201.17^SWIB^SWIB/MDM2 domain^228-298^E:2.4e-18	.	.	.	KEGG:sce:YOR295W`KO:K15223	GO:0005730^cellular_component^nucleolus`GO:0000500^cellular_component^RNA polymerase I upstream activating factor complex`GO:0001165^molecular_function^RNA polymerase I upstream control element sequence-specific DNA binding`GO:0001181^molecular_function^RNA polymerase I general transcription initiation factor activity`GO:0006325^biological_process^chromatin organization`GO:0042790^biological_proc…	GO:0005515^molecular_function^protein binding	.	.
TRINITY_DN76721_c2_g1	TRINITY_DN76721_c2_g1_i8	DIRL1_ARATH^DIRL1_ARATH^Q:2919-3143,H:26-102^40.3%ID^E:2.1e-09^RecName: Full=Putative lipid-transfer protein DIR1;^Eukaryota; Viridiplantae; Streptophyta; Embryophyta; Tracheophyta; Spermatophyta; Magnoliophyta; eudicotyledons; Gunneridae; Pentapetalae; rosids; malvids; Brassicales; Brassicaceae; Camelineae; Arabidopsis	.	TRINITY_DN76721_c2_g1_i8.p3	1957-2271[+]	UAF30_YEAST^UAF30_YEAST^Q:4-99,H:96-192^33%ID^E:7.3e-07^RecName: Full=Upstream activation factor subunit UAF30;^Eukaryota; Fungi; Dikarya; Ascomycota; Saccharomycotina; Saccharomycetes; Saccharomycetales; Saccharomycetaceae; Saccharomyces	PF02201.17^SWIB^SWIB/MDM2 domain^29-99^E:2e-19	.	.	.	KEGG:sce:YOR295W`KO:K15223	GO:0005730^cellular_component^nucleolus`GO:0000500^cellular_component^RNA polymerase I upstream activating factor complex`GO:0001165^molecular_function^RNA polymerase I upstream control element sequence-specific DNA binding`GO:0001181^molecular_function^RNA polymerase I general transcription initiation factor activity`GO:0006325^biological_process^chromatin organization`GO:0042790^biological_proc…	GO:0005515^molecular_function^protein binding	.	.
TRINITY_DN76721_c2_g1	TRINITY_DN76721_c2_g1_i9	UAF30_SCHPO^UAF30_SCHPO^Q:1671-1814,H:140-187^58.3%ID^E:2.8e-09^RecName: Full=Upstream activation factor subunit spp27;^Eukaryota; Fungi; Dikarya; Ascomycota; Taphrinomycotina; Schizosaccharomycetes; Schizosaccharomycetales; Schizosaccharomycetaceae; Schizosaccharomyces	.	TRINITY_DN76721_c2_g1_i9.p3	1791-2150[+]	UAF30_YEAST^UAF30_YEAST^Q:16-114,H:95-192^33.7%ID^E:2.9e-07^RecName: Full=Upstream activation factor subunit UAF30;^Eukaryota; Fungi; Dikarya; Ascomycota; Saccharomycotina; Saccharomycetes; Saccharomycetales; Saccharomycetaceae; Saccharomyces	PF02201.17^SWIB^SWIB/MDM2 domain^44-114^E:3e-19	.	.	.	KEGG:sce:YOR295W`KO:K15223	GO:0005730^cellular_component^nucleolus`GO:0000500^cellular_component^RNA polymerase I upstream activating factor complex`GO:0001165^molecular_function^RNA polymerase I upstream control element sequence-specific DNA binding`GO:0001181^molecular_function^RNA polymerase I general transcription initiation factor activity`GO:0006325^biological_process^chromatin organization`GO:0042790^biological_proc…	GO:0005515^molecular_function^protein binding	.	.
TRINITY_DN76721_c2_g1	TRINITY_DN76721_c2_g1_i10	UAF30_YEAST^UAF30_YEAST^Q:366-572,H:126-193^46.4%ID^E:5.9e-13^RecName: Full=Upstream activation factor subunit UAF30;^Eukaryota; Fungi; Dikarya; Ascomycota; Saccharomycotina; Saccharomycetes; Saccharomycetales; Saccharomycetaceae; Saccharomyces`UAF30_YEAST^UAF30_YEAST^Q:712-999,H:96-192^33%ID^E:3.7e-07^RecName: Full=Upstream activation factor subunit UAF30;^Eukaryota; Fungi; Dikarya; Ascomycota; …	.	TRINITY_DN76721_c2_g1_i10.p1	3-728[+]	UAF30_YEAST^UAF30_YEAST^Q:122-190,H:126-193^46.4%ID^E:4.1e-13^RecName: Full=Upstream activation factor subunit UAF30;^Eukaryota; Fungi; Dikarya; Ascomycota; Saccharomycotina; Saccharomycetes; Saccharomycetales; Saccharomycetaceae; Saccharomyces	PF02201.17^SWIB^SWIB/MDM2 domain^119-190^E:9.2e-28	.	.	.	KEGG:sce:YOR295W`KO:K15223	GO:0005730^cellular_component^nucleolus`GO:0000500^cellular_component^RNA polymerase I upstream activating factor complex`GO:0001165^molecular_function^RNA polymerase I upstream control element sequence-specific DNA binding`GO:0001181^molecular_function^RNA polymerase I general transcription initiation factor activity`GO:0006325^biological_process^chromatin organization`GO:0042790^biological_proc…	GO:0005515^molecular_function^protein binding	.	.
TRINITY_DN76721_c2_g1	TRINITY_DN76721_c2_g1_i11	UAF30_SCHPO^UAF30_SCHPO^Q:1671-1814,H:140-187^58.3%ID^E:3.8e-09^RecName: Full=Upstream activation factor subunit spp27;^Eukaryota; Fungi; Dikarya; Ascomycota; Taphrinomycotina; Schizosaccharomycetes; Schizosaccharomycetales; Schizosaccharomycetaceae; Schizosaccharomyces	.	TRINITY_DN76721_c2_g1_i11.p3	1957-2271[+]	UAF30_YEAST^UAF30_YEAST^Q:4-99,H:96-192^33%ID^E:7.3e-07^RecName: Full=Upstream activation factor subunit UAF30;^Eukaryota; Fungi; Dikarya; Ascomycota; Saccharomycotina; Saccharomycetes; Saccharomycetales; Saccharomycetaceae; Saccharomyces	PF02201.17^SWIB^SWIB/MDM2 domain^29-99^E:2e-19	.	.	.	KEGG:sce:YOR295W`KO:K15223	GO:0005730^cellular_component^nucleolus`GO:0000500^cellular_component^RNA polymerase I upstream activating factor complex`GO:0001165^molecular_function^RNA polymerase I upstream control element sequence-specific DNA binding`GO:0001181^molecular_function^RNA polymerase I general transcription initiation factor activity`GO:0006325^biological_process^chromatin organization`GO:0042790^biological_proc…	GO:0005515^molecular_function^protein binding	.	.
TRINITY_DN76721_c2_g1	TRINITY_DN76721_c2_g1_i12	DIRL1_ARATH^DIRL1_ARATH^Q:2798-3022,H:26-102^40.3%ID^E:2e-09^RecName: Full=Putative lipid-transfer protein DIR1;^Eukaryota; Viridiplantae; Streptophyta; Embryophyta; Tracheophyta; Spermatophyta; Magnoliophyta; eudicotyledons; Gunneridae; Pentapetalae; rosids; malvids; Brassicales; Brassicaceae; Camelineae; Arabidopsis	.	TRINITY_DN76721_c2_g1_i12.p3	1791-2150[+]	UAF30_YEAST^UAF30_YEAST^Q:16-114,H:95-192^33.7%ID^E:2.9e-07^RecName: Full=Upstream activation factor subunit UAF30;^Eukaryota; Fungi; Dikarya; Ascomycota; Saccharomycotina; Saccharomycetes; Saccharomycetales; Saccharomycetaceae; Saccharomyces	PF02201.17^SWIB^SWIB/MDM2 domain^44-114^E:3e-19	.	.	.	KEGG:sce:YOR295W`KO:K15223	GO:0005730^cellular_component^nucleolus`GO:0000500^cellular_component^RNA polymerase I upstream activating factor complex`GO:0001165^molecular_function^RNA polymerase I upstream control element sequence-specific DNA binding`GO:0001181^molecular_function^RNA polymerase I general transcription initiation factor activity`GO:0006325^biological_process^chromatin organization`GO:0042790^biological_proc…	GO:0005515^molecular_function^protein binding	.	.
TRINITY_DN76783_c2_g2	TRINITY_DN76783_c2_g2_i3	.	.	.	.	.	.	.	.	.	.	.	.	.	.
TRINITY_DN76783_c2_g2	TRINITY_DN76783_c2_g2_i2	.	.	.	.	.	.	.	.	.	.	.	.	.	.
TRINITY_DN76783_c2_g2	TRINITY_DN76783_c2_g2_i1	.	.	TRINITY_DN76783_c2_g2_i1.p1	1179-1502[-]	.	.	.	.	.	.	.	.	.	.
TRINITY_DN76783_c2_g2	TRINITY_DN76783_c2_g2_i7	.	.	.	.	.	.	.	.	.	.	.	.	.	.
TRINITY_DN76783_c2_g2	TRINITY_DN76783_c2_g2_i6	.	.	TRINITY_DN76783_c2_g2_i6.p1	2245-2721[-]	.	.	.	ExpAA=21.22^PredHel=1^Topology=i135-157o	.	.	.	.	.	.
TRINITY_DN76783_c2_g2	TRINITY_DN76783_c2_g2_i5	.	.	TRINITY_DN76783_c2_g2_i5.p1	2225-2701[-]	.	.	.	ExpAA=21.22^PredHel=1^Topology=i135-157o	.	.	.	.	.	.
TRINITY_DN76783_c2_g2	TRINITY_DN76783_c2_g2_i4	.	.	TRINITY_DN76783_c2_g2_i4.p1	1213-1536[-]	.	.	.	.	.	.	.	.	.	.
TRINITY_DN76783_c2_g2	TRINITY_DN76783_c2_g2_i9	.	.	TRINITY_DN76783_c2_g2_i9.p1	2245-2700[-]	.	.	.	ExpAA=21.24^PredHel=1^Topology=i128-150o	.	.	.	.	.	.
TRINITY_DN76783_c2_g2	TRINITY_DN76783_c2_g2_i10	.	.	.	.	.	.	.	.	.	.	.	.	.	.
TRINITY_DN76783_c2_g2	TRINITY_DN76783_c2_g2_i11	.	.	TRINITY_DN76783_c2_g2_i11.p1	2225-2680[-]	.	.	.	ExpAA=21.24^PredHel=1^Topology=i128-150o	.	.	.	.	.	.
TRINITY_DN76741_c3_g1	TRINITY_DN76741_c3_g1_i3	SUVH9_ARATH^SUVH9_ARATH^Q:4-1893,H:53-650^63.8%ID^E:7e-221^RecName: Full=Histone-lysine N-methyltransferase family member SUVH9;^Eukaryota; Viridiplantae; Streptophyta; Embryophyta; Tracheophyta; Spermatophyta; Magnoliophyta; eudicotyledons; Gunneridae; Pentapetalae; rosids; malvids; Brassicales; Brassicaceae; Camelineae; Arabidopsis	.	TRINITY_DN76741_c3_g1_i3.p1	1-1896[+]	SUVH9_ARATH^SUVH9_ARATH^Q:2-631,H:53-650^63.8%ID^E:2.7e-221^RecName: Full=Histone-lysine N-methyltransferase family member SUVH9;^Eukaryota; Viridiplantae; Streptophyta; Embryophyta; Tracheophyta; Spermatophyta; Magnoliophyta; eudicotyledons; Gunneridae; Pentapetalae; rosids; malvids; Brassicales; Brassicaceae; Camelineae; Arabidopsis	PF02182.16^SAD_SRA^SAD/SRA domain^187-339^E:2.5e-47`PF05033.15^Pre-SET^Pre-SET motif^371-467^E:1.5e-16`PF00856.27^SET^SET domain^486-618^E:1.8e-13	.	.	COG3440^ubiquitin-like with PHD and ring finger domains 2, E3 ubiquitin protein ligase	KEGG:ath:AT4G13460`KO:K11420	GO:0000775^cellular_component^chromosome, centromeric region`GO:0005634^cellular_component^nucleus`GO:0003677^molecular_function^DNA binding`GO:0018024^molecular_function^histone-lysine N-methyltransferase activity`GO:0008270^molecular_function^zinc ion binding`GO:0009294^biological_process^DNA mediated transformation`GO:0080188^biological_process^RNA-directed DNA methylation	GO:0008270^molecular_function^zinc ion binding`GO:0018024^molecular_function^histone-lysine N-methyltransferase activity`GO:0034968^biological_process^histone lysine methylation`GO:0005634^cellular_component^nucleus`GO:0005515^molecular_function^protein binding	.	.
TRINITY_DN76741_c3_g1	TRINITY_DN76741_c3_g1_i2	SUVH9_ARATH^SUVH9_ARATH^Q:4-1893,H:53-650^63.8%ID^E:6.9e-221^RecName: Full=Histone-lysine N-methyltransferase family member SUVH9;^Eukaryota; Viridiplantae; Streptophyta; Embryophyta; Tracheophyta; Spermatophyta; Magnoliophyta; eudicotyledons; Gunneridae; Pentapetalae; rosids; malvids; Brassicales; Brassicaceae; Camelineae; Arabidopsis	.	TRINITY_DN76741_c3_g1_i2.p1	1-1896[+]	SUVH9_ARATH^SUVH9_ARATH^Q:2-631,H:53-650^63.8%ID^E:2.7e-221^RecName: Full=Histone-lysine N-methyltransferase family member SUVH9;^Eukaryota; Viridiplantae; Streptophyta; Embryophyta; Tracheophyta; Spermatophyta; Magnoliophyta; eudicotyledons; Gunneridae; Pentapetalae; rosids; malvids; Brassicales; Brassicaceae; Camelineae; Arabidopsis	PF02182.16^SAD_SRA^SAD/SRA domain^187-339^E:2.5e-47`PF05033.15^Pre-SET^Pre-SET motif^371-467^E:1.5e-16`PF00856.27^SET^SET domain^486-618^E:1.8e-13	.	.	COG3440^ubiquitin-like with PHD and ring finger domains 2, E3 ubiquitin protein ligase	KEGG:ath:AT4G13460`KO:K11420	GO:0000775^cellular_component^chromosome, centromeric region`GO:0005634^cellular_component^nucleus`GO:0003677^molecular_function^DNA binding`GO:0018024^molecular_function^histone-lysine N-methyltransferase activity`GO:0008270^molecular_function^zinc ion binding`GO:0009294^biological_process^DNA mediated transformation`GO:0080188^biological_process^RNA-directed DNA methylation	GO:0008270^molecular_function^zinc ion binding`GO:0018024^molecular_function^histone-lysine N-methyltransferase activity`GO:0034968^biological_process^histone lysine methylation`GO:0005634^cellular_component^nucleus`GO:0005515^molecular_function^protein binding	.	.
TRINITY_DN76741_c3_g1	TRINITY_DN76741_c3_g1_i1	SUVH9_ARATH^SUVH9_ARATH^Q:4-1893,H:53-650^63.8%ID^E:6.9e-221^RecName: Full=Histone-lysine N-methyltransferase family member SUVH9;^Eukaryota; Viridiplantae; Streptophyta; Embryophyta; Tracheophyta; Spermatophyta; Magnoliophyta; eudicotyledons; Gunneridae; Pentapetalae; rosids; malvids; Brassicales; Brassicaceae; Camelineae; Arabidopsis	.	TRINITY_DN76741_c3_g1_i1.p1	1-1896[+]	SUVH9_ARATH^SUVH9_ARATH^Q:2-631,H:53-650^63.8%ID^E:2.7e-221^RecName: Full=Histone-lysine N-methyltransferase family member SUVH9;^Eukaryota; Viridiplantae; Streptophyta; Embryophyta; Tracheophyta; Spermatophyta; Magnoliophyta; eudicotyledons; Gunneridae; Pentapetalae; rosids; malvids; Brassicales; Brassicaceae; Camelineae; Arabidopsis	PF02182.16^SAD_SRA^SAD/SRA domain^187-339^E:2.5e-47`PF05033.15^Pre-SET^Pre-SET motif^371-467^E:1.5e-16`PF00856.27^SET^SET domain^486-618^E:1.8e-13	.	.	COG3440^ubiquitin-like with PHD and ring finger domains 2, E3 ubiquitin protein ligase	KEGG:ath:AT4G13460`KO:K11420	GO:0000775^cellular_component^chromosome, centromeric region`GO:0005634^cellular_component^nucleus`GO:0003677^molecular_function^DNA binding`GO:0018024^molecular_function^histone-lysine N-methyltransferase activity`GO:0008270^molecular_function^zinc ion binding`GO:0009294^biological_process^DNA mediated transformation`GO:0080188^biological_process^RNA-directed DNA methylation	GO:0008270^molecular_function^zinc ion binding`GO:0018024^molecular_function^histone-lysine N-methyltransferase activity`GO:0034968^biological_process^histone lysine methylation`GO:0005634^cellular_component^nucleus`GO:0005515^molecular_function^protein binding	.	.
TRINITY_DN76741_c3_g1	TRINITY_DN76741_c3_g1_i6	.	.	TRINITY_DN76741_c3_g1_i6.p1	652-957[-]	.	PF07522.13^DRMBL^DNA repair metallo-beta-lactamase^4-44^E:2.5e-09	.	.	.	.	.	.	.	.
TRINITY_DN76741_c3_g1	TRINITY_DN76741_c3_g1_i5	SUVH9_ARATH^SUVH9_ARATH^Q:4-1875,H:53-650^65.7%ID^E:3.9e-224^RecName: Full=Histone-lysine N-methyltransferase family member SUVH9;^Eukaryota; Viridiplantae; Streptophyta; Embryophyta; Tracheophyta; Spermatophyta; Magnoliophyta; eudicotyledons; Gunneridae; Pentapetalae; rosids; malvids; Brassicales; Brassicaceae; Camelineae; Arabidopsis	.	TRINITY_DN76741_c3_g1_i5.p1	1-1878[+]	SUVH9_ARATH^SUVH9_ARATH^Q:2-625,H:53-650^65.7%ID^E:1.5e-224^RecName: Full=Histone-lysine N-methyltransferase family member SUVH9;^Eukaryota; Viridiplantae; Streptophyta; Embryophyta; Tracheophyta; Spermatophyta; Magnoliophyta; eudicotyledons; Gunneridae; Pentapetalae; rosids; malvids; Brassicales; Brassicaceae; Camelineae; Arabidopsis	PF02182.16^SAD_SRA^SAD/SRA domain^181-333^E:2.5e-47`PF05033.15^Pre-SET^Pre-SET motif^365-461^E:1.5e-16`PF00856.27^SET^SET domain^480-612^E:1.8e-13	.	.	COG3440^ubiquitin-like with PHD and ring finger domains 2, E3 ubiquitin protein ligase	KEGG:ath:AT4G13460`KO:K11420	GO:0000775^cellular_component^chromosome, centromeric region`GO:0005634^cellular_component^nucleus`GO:0003677^molecular_function^DNA binding`GO:0018024^molecular_function^histone-lysine N-methyltransferase activity`GO:0008270^molecular_function^zinc ion binding`GO:0009294^biological_process^DNA mediated transformation`GO:0080188^biological_process^RNA-directed DNA methylation	GO:0008270^molecular_function^zinc ion binding`GO:0018024^molecular_function^histone-lysine N-methyltransferase activity`GO:0034968^biological_process^histone lysine methylation`GO:0005634^cellular_component^nucleus`GO:0005515^molecular_function^protein binding	.	.
TRINITY_DN76741_c3_g1	TRINITY_DN76741_c3_g1_i4	SUVH9_ARATH^SUVH9_ARATH^Q:4-1875,H:53-650^65.7%ID^E:4e-224^RecName: Full=Histone-lysine N-methyltransferase family member SUVH9;^Eukaryota; Viridiplantae; Streptophyta; Embryophyta; Tracheophyta; Spermatophyta; Magnoliophyta; eudicotyledons; Gunneridae; Pentapetalae; rosids; malvids; Brassicales; Brassicaceae; Camelineae; Arabidopsis	.	TRINITY_DN76741_c3_g1_i4.p1	1-1878[+]	SUVH9_ARATH^SUVH9_ARATH^Q:2-625,H:53-650^65.7%ID^E:1.5e-224^RecName: Full=Histone-lysine N-methyltransferase family member SUVH9;^Eukaryota; Viridiplantae; Streptophyta; Embryophyta; Tracheophyta; Spermatophyta; Magnoliophyta; eudicotyledons; Gunneridae; Pentapetalae; rosids; malvids; Brassicales; Brassicaceae; Camelineae; Arabidopsis	PF02182.16^SAD_SRA^SAD/SRA domain^181-333^E:2.5e-47`PF05033.15^Pre-SET^Pre-SET motif^365-461^E:1.5e-16`PF00856.27^SET^SET domain^480-612^E:1.8e-13	.	.	COG3440^ubiquitin-like with PHD and ring finger domains 2, E3 ubiquitin protein ligase	KEGG:ath:AT4G13460`KO:K11420	GO:0000775^cellular_component^chromosome, centromeric region`GO:0005634^cellular_component^nucleus`GO:0003677^molecular_function^DNA binding`GO:0018024^molecular_function^histone-lysine N-methyltransferase activity`GO:0008270^molecular_function^zinc ion binding`GO:0009294^biological_process^DNA mediated transformation`GO:0080188^biological_process^RNA-directed DNA methylation	GO:0008270^molecular_function^zinc ion binding`GO:0018024^molecular_function^histone-lysine N-methyltransferase activity`GO:0034968^biological_process^histone lysine methylation`GO:0005634^cellular_component^nucleus`GO:0005515^molecular_function^protein binding	.	.
TRINITY_DN76741_c1_g1	TRINITY_DN76741_c1_g1_i1	Y3427_DROME^Y3427_DROME^Q:417-857,H:40-195^60.3%ID^E:8.8e-28^RecName: Full=Uncharacterized protein CG43427;^Eukaryota; Metazoa; Ecdysozoa; Arthropoda; Hexapoda; Insecta; Pterygota; Neoptera; Holometabola; Diptera; Brachycera; Muscomorpha; Ephydroidea; Drosophilidae; Drosophila; Sophophora	.	TRINITY_DN76741_c1_g1_i1.p1	372-1085[+]	Y3427_DROME^Y3427_DROME^Q:16-162,H:40-195^60.3%ID^E:5.8e-28^RecName: Full=Uncharacterized protein CG43427;^Eukaryota; Metazoa; Ecdysozoa; Arthropoda; Hexapoda; Insecta; Pterygota; Neoptera; Holometabola; Diptera; Brachycera; Muscomorpha; Ephydroidea; Drosophilidae; Drosophila; Sophophora	PF15949.4^DUF4757^Domain of unknown function (DUF4757)^4-126^E:3.7e-23	.	.	ENOG4111HMN^LIM and calponin homology domains 1	KEGG:dme:Dmel_CG43427	.	.	.	.
TRINITY_DN76749_c1_g3	TRINITY_DN76749_c1_g3_i1	.	.	TRINITY_DN76749_c1_g3_i1.p1	1-525[-]	.	.	.	ExpAA=57.01^PredHel=3^Topology=i7-29o34-56i68-87o	.	.	.	.	.	.
TRINITY_DN76749_c1_g2	TRINITY_DN76749_c1_g2_i1	.	.	TRINITY_DN76749_c1_g2_i1.p1	544-1443[-]	.	.	.	.	.	.	.	.	.	.
TRINITY_DN76749_c1_g2	TRINITY_DN76749_c1_g2_i2	.	.	TRINITY_DN76749_c1_g2_i2.p1	544-1443[-]	.	.	.	.	.	.	.	.	.	.
TRINITY_DN76739_c4_g3	TRINITY_DN76739_c4_g3_i2	.	.	TRINITY_DN76739_c4_g3_i2.p1	2-307[+]	.	.	.	ExpAA=35.49^PredHel=2^Topology=o20-42i75-97o	.	.	.	.	.	.
TRINITY_DN76739_c4_g3	TRINITY_DN76739_c4_g3_i1	.	.	.	.	.	.	.	.	.	.	.	.	.	.
TRINITY_DN76739_c1_g2	TRINITY_DN76739_c1_g2_i1	.	.	TRINITY_DN76739_c1_g2_i1.p1	3-401[-]	.	.	.	.	.	.	.	.	.	.
TRINITY_DN76739_c1_g2	TRINITY_DN76739_c1_g2_i2	.	.	.	.	.	.	.	.	.	.	.	.	.	.
TRINITY_DN76739_c2_g1	TRINITY_DN76739_c2_g1_i2	.	.	TRINITY_DN76739_c2_g1_i2.p1	4-420[-]	.	PF03732.16^Retrotrans_gag^Retrotransposon gag protein^85-138^E:1.3e-05	.	.	.	.	.	.	.	.
TRINITY_DN76739_c2_g1	TRINITY_DN76739_c2_g1_i1	.	.	.	.	.	.	.	.	.	.	.	.	.	.
TRINITY_DN76775_c2_g6	TRINITY_DN76775_c2_g6_i1	RNHX1_ARATH^RNHX1_ARATH^Q:32-370,H:286-400^28.2%ID^E:2.4e-08^RecName: Full=Putative ribonuclease H protein At1g65750;^Eukaryota; Viridiplantae; Streptophyta; Embryophyta; Tracheophyta; Spermatophyta; Magnoliophyta; eudicotyledons; Gunneridae; Pentapetalae; rosids; malvids; Brassicales; Brassicaceae; Camelineae; Arabidopsis	.	TRINITY_DN76775_c2_g6_i1.p1	2-439[+]	.	PF13966.5^zf-RVT^zinc-binding in reverse transcriptase^8-78^E:1.3e-21	.	.	.	.	.	.	.	.
TRINITY_DN76735_c2_g2	TRINITY_DN76735_c2_g2_i3	.	.	TRINITY_DN76735_c2_g2_i3.p1	934-2616[+]	.	.	.	ExpAA=22.08^PredHel=1^Topology=i19-41o	.	.	.	.	.	.
TRINITY_DN76735_c2_g2	TRINITY_DN76735_c2_g2_i2	.	.	.	.	.	.	.	.	.	.	.	.	.	.
TRINITY_DN76735_c2_g2	TRINITY_DN76735_c2_g2_i1	.	.	TRINITY_DN76735_c2_g2_i1.p1	641-2323[+]	.	.	.	ExpAA=22.08^PredHel=1^Topology=i19-41o	.	.	.	.	.	.
TRINITY_DN76735_c2_g2	TRINITY_DN76735_c2_g2_i5	.	.	.	.	.	.	.	.	.	.	.	.	.	.
TRINITY_DN76735_c2_g2	TRINITY_DN76735_c2_g2_i4	.	.	TRINITY_DN76735_c2_g2_i4.p1	641-2323[+]	.	.	.	ExpAA=22.08^PredHel=1^Topology=i19-41o	.	.	.	.	.	.
TRINITY_DN76735_c1_g1	TRINITY_DN76735_c1_g1_i1	.	.	TRINITY_DN76735_c1_g1_i1.p1	48-374[+]	.	.	.	ExpAA=37.59^PredHel=1^Topology=o32-54i	.	.	.	.	.	.
TRINITY_DN76735_c2_g1	TRINITY_DN76735_c2_g1_i2	.	.	.	.	.	.	.	.	.	.	.	.	.	.
TRINITY_DN76735_c2_g1	TRINITY_DN76735_c2_g1_i3	.	.	.	.	.	.	.	.	.	.	.	.	.	.
TRINITY_DN76735_c2_g1	TRINITY_DN76735_c2_g1_i1	.	.	TRINITY_DN76735_c2_g1_i1.p1	179-529[+]	.	.	.	.	.	.	.	.	.	.
TRINITY_DN76735_c2_g1	TRINITY_DN76735_c2_g1_i4	.	.	.	.	.	.	.	.	.	.	.	.	.	.
TRINITY_DN76746_c2_g2	TRINITY_DN76746_c2_g2_i3	.	.	.	.	.	.	.	.	.	.	.	.	.	.
TRINITY_DN76746_c2_g2	TRINITY_DN76746_c2_g2_i7	.	.	.	.	.	.	.	.	.	.	.	.	.	.
TRINITY_DN76746_c2_g2	TRINITY_DN76746_c2_g2_i6	.	.	.	.	.	.	.	.	.	.	.	.	.	.
TRINITY_DN76746_c2_g2	TRINITY_DN76746_c2_g2_i4	.	.	TRINITY_DN76746_c2_g2_i4.p1	268-570[+]	.	.	.	.	.	.	.	.	.	.
TRINITY_DN76746_c2_g1	TRINITY_DN76746_c2_g1_i2	ALKB6_MOUSE^ALKB6_MOUSE^Q:382-5,H:11-137^49.6%ID^E:2.6e-33^RecName: Full=Alpha-ketoglutarate-dependent dioxygenase alkB homolog 6;^Eukaryota; Metazoa; Chordata; Craniata; Vertebrata; Euteleostomi; Mammalia; Eutheria; Euarchontoglires; Glires; Rodentia; Myomorpha; Muroidea; Muridae; Murinae; Mus; Mus	.	TRINITY_DN76746_c2_g1_i2.p1	2-529[-]	ALKB6_MOUSE^ALKB6_MOUSE^Q:50-175,H:11-137^49.6%ID^E:2.6e-33^RecName: Full=Alpha-ketoglutarate-dependent dioxygenase alkB homolog 6;^Eukaryota; Metazoa; Chordata; Craniata; Vertebrata; Euteleostomi; Mammalia; Eutheria; Euarchontoglires; Glires; Rodentia; Myomorpha; Muroidea; Muridae; Murinae; Mus; Mus	PF13532.5^2OG-FeII_Oxy_2^2OG-Fe(II) oxygenase superfamily^97-175^E:4.4e-07	sigP:1^20^0.792^YES	.	ENOG410XR69^AlkB, alkylation repair homolog 6 (E. coli)	KEGG:mmu:233065`KO:K10768	GO:0005737^cellular_component^cytoplasm`GO:0005925^cellular_component^focal adhesion`GO:0005654^cellular_component^nucleoplasm`GO:0005634^cellular_component^nucleus`GO:0051213^molecular_function^dioxygenase activity`GO:0008198^molecular_function^ferrous iron binding	.	.	.
TRINITY_DN76746_c2_g1	TRINITY_DN76746_c2_g1_i3	ALKB6_MOUSE^ALKB6_MOUSE^Q:152-3,H:62-111^42%ID^E:2e-06^RecName: Full=Alpha-ketoglutarate-dependent dioxygenase alkB homolog 6;^Eukaryota; Metazoa; Chordata; Craniata; Vertebrata; Euteleostomi; Mammalia; Eutheria; Euarchontoglires; Glires; Rodentia; Myomorpha; Muroidea; Muridae; Murinae; Mus; Mus	.	.	.	.	.	.	.	ENOG410XR69^AlkB, alkylation repair homolog 6 (E. coli)	KEGG:mmu:233065`KO:K10768	GO:0005737^cellular_component^cytoplasm`GO:0005925^cellular_component^focal adhesion`GO:0005654^cellular_component^nucleoplasm`GO:0005634^cellular_component^nucleus`GO:0051213^molecular_function^dioxygenase activity`GO:0008198^molecular_function^ferrous iron binding	.	.	.
TRINITY_DN76746_c2_g1	TRINITY_DN76746_c2_g1_i6	.	.	.	.	.	.	.	.	.	.	.	.	.	.
TRINITY_DN76746_c2_g1	TRINITY_DN76746_c2_g1_i5	ALKB6_MOUSE^ALKB6_MOUSE^Q:382-5,H:11-137^49.6%ID^E:2.8e-33^RecName: Full=Alpha-ketoglutarate-dependent dioxygenase alkB homolog 6;^Eukaryota; Metazoa; Chordata; Craniata; Vertebrata; Euteleostomi; Mammalia; Eutheria; Euarchontoglires; Glires; Rodentia; Myomorpha; Muroidea; Muridae; Murinae; Mus; Mus	.	TRINITY_DN76746_c2_g1_i5.p1	2-439[-]	ALKB6_MOUSE^ALKB6_MOUSE^Q:20-145,H:11-137^49.6%ID^E:1.7e-33^RecName: Full=Alpha-ketoglutarate-dependent dioxygenase alkB homolog 6;^Eukaryota; Metazoa; Chordata; Craniata; Vertebrata; Euteleostomi; Mammalia; Eutheria; Euarchontoglires; Glires; Rodentia; Myomorpha; Muroidea; Muridae; Murinae; Mus; Mus	PF13532.5^2OG-FeII_Oxy_2^2OG-Fe(II) oxygenase superfamily^67-145^E:2.7e-07	.	.	ENOG410XR69^AlkB, alkylation repair homolog 6 (E. coli)	KEGG:mmu:233065`KO:K10768	GO:0005737^cellular_component^cytoplasm`GO:0005925^cellular_component^focal adhesion`GO:0005654^cellular_component^nucleoplasm`GO:0005634^cellular_component^nucleus`GO:0051213^molecular_function^dioxygenase activity`GO:0008198^molecular_function^ferrous iron binding	.	.	.
TRINITY_DN76746_c2_g1	TRINITY_DN76746_c2_g1_i8	ALKB6_DANRE^ALKB6_DANRE^Q:214-89,H:21-62^64.3%ID^E:2.6e-09^RecName: Full=Alpha-ketoglutarate-dependent dioxygenase alkB homolog 6;^Eukaryota; Metazoa; Chordata; Craniata; Vertebrata; Euteleostomi; Actinopterygii; Neopterygii; Teleostei; Ostariophysi; Cypriniformes; Cyprinidae; Danio	.	.	.	.	.	.	.	ENOG410XR69^AlkB, alkylation repair homolog 6 (E. coli)	KEGG:dre:317736`KO:K10768	GO:0005737^cellular_component^cytoplasm`GO:0005634^cellular_component^nucleus`GO:0051213^molecular_function^dioxygenase activity`GO:0008198^molecular_function^ferrous iron binding	.	.	.
TRINITY_DN76746_c2_g1	TRINITY_DN76746_c2_g1_i9	ALKB6_DANRE^ALKB6_DANRE^Q:214-89,H:21-62^64.3%ID^E:3.3e-09^RecName: Full=Alpha-ketoglutarate-dependent dioxygenase alkB homolog 6;^Eukaryota; Metazoa; Chordata; Craniata; Vertebrata; Euteleostomi; Actinopterygii; Neopterygii; Teleostei; Ostariophysi; Cypriniformes; Cyprinidae; Danio	.	TRINITY_DN76746_c2_g1_i9.p1	32-388[-]	.	.	sigP:1^20^0.791^YES	.	.	.	.	.	.	.
TRINITY_DN76746_c2_g1	TRINITY_DN76746_c2_g1_i10	ALKB6_MOUSE^ALKB6_MOUSE^Q:382-5,H:11-137^49.6%ID^E:2.1e-33^RecName: Full=Alpha-ketoglutarate-dependent dioxygenase alkB homolog 6;^Eukaryota; Metazoa; Chordata; Craniata; Vertebrata; Euteleostomi; Mammalia; Eutheria; Euarchontoglires; Glires; Rodentia; Myomorpha; Muroidea; Muridae; Murinae; Mus; Mus	.	TRINITY_DN76746_c2_g1_i10.p1	2-400[-]	ALKB6_MOUSE^ALKB6_MOUSE^Q:7-132,H:11-137^49.6%ID^E:1.5e-33^RecName: Full=Alpha-ketoglutarate-dependent dioxygenase alkB homolog 6;^Eukaryota; Metazoa; Chordata; Craniata; Vertebrata; Euteleostomi; Mammalia; Eutheria; Euarchontoglires; Glires; Rodentia; Myomorpha; Muroidea; Muridae; Murinae; Mus; Mus	PF13532.5^2OG-FeII_Oxy_2^2OG-Fe(II) oxygenase superfamily^52-132^E:1.1e-07	.	.	ENOG410XR69^AlkB, alkylation repair homolog 6 (E. coli)	KEGG:mmu:233065`KO:K10768	GO:0005737^cellular_component^cytoplasm`GO:0005925^cellular_component^focal adhesion`GO:0005654^cellular_component^nucleoplasm`GO:0005634^cellular_component^nucleus`GO:0051213^molecular_function^dioxygenase activity`GO:0008198^molecular_function^ferrous iron binding	.	.	.
TRINITY_DN76746_c2_g1	TRINITY_DN76746_c2_g1_i11	ALKB6_MOUSE^ALKB6_MOUSE^Q:152-3,H:62-111^42%ID^E:2.6e-06^RecName: Full=Alpha-ketoglutarate-dependent dioxygenase alkB homolog 6;^Eukaryota; Metazoa; Chordata; Craniata; Vertebrata; Euteleostomi; Mammalia; Eutheria; Euarchontoglires; Glires; Rodentia; Myomorpha; Muroidea; Muridae; Murinae; Mus; Mus	.	.	.	.	.	.	.	ENOG410XR69^AlkB, alkylation repair homolog 6 (E. coli)	KEGG:mmu:233065`KO:K10768	GO:0005737^cellular_component^cytoplasm`GO:0005925^cellular_component^focal adhesion`GO:0005654^cellular_component^nucleoplasm`GO:0005634^cellular_component^nucleus`GO:0051213^molecular_function^dioxygenase activity`GO:0008198^molecular_function^ferrous iron binding	.	.	.
TRINITY_DN76746_c2_g1	TRINITY_DN76746_c2_g1_i13	.	.	.	.	.	.	.	.	.	.	.	.	.	.
TRINITY_DN76734_c1_g2	TRINITY_DN76734_c1_g2_i13	PDR3_TOBAC^PDR3_TOBAC^Q:1568-24,H:228-742^74.4%ID^E:3e-229^RecName: Full=Pleiotropic drug resistance protein 3;^Eukaryota; Viridiplantae; Streptophyta; Embryophyta; Tracheophyta; Spermatophyta; Magnoliophyta; eudicotyledons; Gunneridae; Pentapetalae; asterids; lamiids; Solanales; Solanaceae; Nicotianoideae; Nicotianeae; Nicotiana	.	TRINITY_DN76734_c1_g2_i13.p1	3-1469[-]	AB37G_ARATH^AB37G_ARATH^Q:1-483,H:263-745^73.5%ID^E:7.3e-211^RecName: Full=ABC transporter G family member 37;^Eukaryota; Viridiplantae; Streptophyta; Embryophyta; Tracheophyta; Spermatophyta; Magnoliophyta; eudicotyledons; Gunneridae; Pentapetalae; rosids; malvids; Brassicales; Brassicaceae; Camelineae; Arabidopsis	PF01061.23^ABC2_membrane^ABC-2 type transporter^264-475^E:2.5e-35	.	ExpAA=111.94^PredHel=5^Topology=i280-302o317-339i351-373o395-417i424-446o	COG0842^(ABC) transporter	KEGG:ath:AT3G53480	GO:0016021^cellular_component^integral component of membrane`GO:0005886^cellular_component^plasma membrane`GO:0009506^cellular_component^plasmodesma`GO:0005524^molecular_function^ATP binding`GO:0042626^molecular_function^ATPase activity, coupled to transmembrane movement of substances`GO:0005215^molecular_function^transporter activity`GO:0009926^biological_process^auxin polar transport`GO:0071366…	GO:0016020^cellular_component^membrane	.	.
TRINITY_DN76734_c1_g2	TRINITY_DN76734_c1_g2_i10	PDR3_TOBAC^PDR3_TOBAC^Q:1279-422,H:325-610^75.5%ID^E:1.1e-122^RecName: Full=Pleiotropic drug resistance protein 3;^Eukaryota; Viridiplantae; Streptophyta; Embryophyta; Tracheophyta; Spermatophyta; Magnoliophyta; eudicotyledons; Gunneridae; Pentapetalae; asterids; lamiids; Solanales; Solanaceae; Nicotianoideae; Nicotianeae; Nicotiana`PDR3_TOBAC^PDR3_TOBAC^Q:443-24,H:603-742^62.9%ID^E:8.8e-51^RecNa…	.	TRINITY_DN76734_c1_g2_i10.p1	371-1153[-]	PDR3_TOBAC^PDR3_TOBAC^Q:1-244,H:367-610^73%ID^E:2.1e-100^RecName: Full=Pleiotropic drug resistance protein 3;^Eukaryota; Viridiplantae; Streptophyta; Embryophyta; Tracheophyta; Spermatophyta; Magnoliophyta; eudicotyledons; Gunneridae; Pentapetalae; asterids; lamiids; Solanales; Solanaceae; Nicotianoideae; Nicotianeae; Nicotiana	PF01061.23^ABC2_membrane^ABC-2 type transporter^158-246^E:1.8e-06	.	ExpAA=43.85^PredHel=2^Topology=i174-196o211-233i	.	KEGG:nta:107764055`KEGG:nta:107812050	GO:0016021^cellular_component^integral component of membrane`GO:0005524^molecular_function^ATP binding`GO:0016887^molecular_function^ATPase activity	GO:0016020^cellular_component^membrane	.	.
TRINITY_DN76734_c1_g2	TRINITY_DN76734_c1_g2_i11	PDR3_TOBAC^PDR3_TOBAC^Q:1590-481,H:285-654^75.4%ID^E:2e-164^RecName: Full=Pleiotropic drug resistance protein 3;^Eukaryota; Viridiplantae; Streptophyta; Embryophyta; Tracheophyta; Spermatophyta; Magnoliophyta; eudicotyledons; Gunneridae; Pentapetalae; asterids; lamiids; Solanales; Solanaceae; Nicotianoideae; Nicotianeae; Nicotiana`PDR3_TOBAC^PDR3_TOBAC^Q:290-24,H:654-742^70.8%ID^E:7.3e-29^RecName…	.	TRINITY_DN76734_c1_g2_i11.p1	478-1644[-]	PDR3_TOBAC^PDR3_TOBAC^Q:19-388,H:285-654^75.4%ID^E:2.4e-164^RecName: Full=Pleiotropic drug resistance protein 3;^Eukaryota; Viridiplantae; Streptophyta; Embryophyta; Tracheophyta; Spermatophyta; Magnoliophyta; eudicotyledons; Gunneridae; Pentapetalae; asterids; lamiids; Solanales; Solanaceae; Nicotianoideae; Nicotianeae; Nicotiana	PF01061.23^ABC2_membrane^ABC-2 type transporter^258-384^E:2.8e-18	.	ExpAA=61.27^PredHel=2^Topology=o275-297i304-326o	.	KEGG:nta:107764055`KEGG:nta:107812050	GO:0016021^cellular_component^integral component of membrane`GO:0005524^molecular_function^ATP binding`GO:0016887^molecular_function^ATPase activity	GO:0016020^cellular_component^membrane	.	.
TRINITY_DN76734_c1_g2	TRINITY_DN76734_c1_g2_i16	PDR3_TOBAC^PDR3_TOBAC^Q:1409-24,H:281-742^73.6%ID^E:1e-201^RecName: Full=Pleiotropic drug resistance protein 3;^Eukaryota; Viridiplantae; Streptophyta; Embryophyta; Tracheophyta; Spermatophyta; Magnoliophyta; eudicotyledons; Gunneridae; Pentapetalae; asterids; lamiids; Solanales; Solanaceae; Nicotianoideae; Nicotianeae; Nicotiana`PDR3_TOBAC^PDR3_TOBAC^Q:2373-1516,H:1-280^71.4%ID^E:3e-108^RecName:…	.	TRINITY_DN76734_c1_g2_i16.p1	3-1403[-]	PDR3_TOBAC^PDR3_TOBAC^Q:1-460,H:283-742^73.7%ID^E:5e-201^RecName: Full=Pleiotropic drug resistance protein 3;^Eukaryota; Viridiplantae; Streptophyta; Embryophyta; Tracheophyta; Spermatophyta; Magnoliophyta; eudicotyledons; Gunneridae; Pentapetalae; asterids; lamiids; Solanales; Solanaceae; Nicotianoideae; Nicotianeae; Nicotiana	PF01061.23^ABC2_membrane^ABC-2 type transporter^242-453^E:2.2e-35	.	ExpAA=112.14^PredHel=5^Topology=i258-280o295-317i329-351o373-395i402-424o	.	KEGG:nta:107764055`KEGG:nta:107812050	GO:0016021^cellular_component^integral component of membrane`GO:0005524^molecular_function^ATP binding`GO:0016887^molecular_function^ATPase activity	GO:0016020^cellular_component^membrane	.	.
TRINITY_DN76734_c1_g2	TRINITY_DN76734_c1_g2_i17	AB37G_ARATH^AB37G_ARATH^Q:1603-482,H:283-656^75.4%ID^E:2.9e-165^RecName: Full=ABC transporter G family member 37;^Eukaryota; Viridiplantae; Streptophyta; Embryophyta; Tracheophyta; Spermatophyta; Magnoliophyta; eudicotyledons; Gunneridae; Pentapetalae; rosids; malvids; Brassicales; Brassicaceae; Camelineae; Arabidopsis`AB37G_ARATH^AB37G_ARATH^Q:2567-21,H:1-745^38%ID^E:8.9e-114^RecName: Full=ABC t…	.	TRINITY_DN76734_c1_g2_i17.p2	1680-2567[-]	PDR3_TOBAC^PDR3_TOBAC^Q:1-286,H:1-280^71.4%ID^E:1.4e-108^RecName: Full=Pleiotropic drug resistance protein 3;^Eukaryota; Viridiplantae; Streptophyta; Embryophyta; Tracheophyta; Spermatophyta; Magnoliophyta; eudicotyledons; Gunneridae; Pentapetalae; asterids; lamiids; Solanales; Solanaceae; Nicotianoideae; Nicotianeae; Nicotiana	PF14510.5^ABC_trans_N^ABC-transporter extracellular N-terminal^99-169^E:5.4e-09`PF00005.26^ABC_tran^ABC transporter^195-282^E:9.1e-12`PF00004.28^AAA^ATPase family associated with various cellular activities (AAA)^208-232^E:9e-05	.	.	.	KEGG:nta:107764055`KEGG:nta:107812050	GO:0016021^cellular_component^integral component of membrane`GO:0005524^molecular_function^ATP binding`GO:0016887^molecular_function^ATPase activity	GO:0005524^molecular_function^ATP binding`GO:0016887^molecular_function^ATPase activity	.	.
TRINITY_DN76734_c1_g2	TRINITY_DN76734_c1_g2_i14	AB33G_ARATH^AB33G_ARATH^Q:271-113,H:620-672^58.5%ID^E:1.7e-08^RecName: Full=ABC transporter G family member 33;^Eukaryota; Viridiplantae; Streptophyta; Embryophyta; Tracheophyta; Spermatophyta; Magnoliophyta; eudicotyledons; Gunneridae; Pentapetalae; rosids; malvids; Brassicales; Brassicaceae; Camelineae; Arabidopsis	.	.	.	.	.	.	.	COG0842^(ABC) transporter	KEGG:ath:AT2G37280	GO:0016021^cellular_component^integral component of membrane`GO:0005886^cellular_component^plasma membrane`GO:0005524^molecular_function^ATP binding`GO:0042626^molecular_function^ATPase activity, coupled to transmembrane movement of substances`GO:0006855^biological_process^drug transmembrane transport	.	.	.
TRINITY_DN76734_c1_g2	TRINITY_DN76734_c1_g2_i15	PDR3_TOBAC^PDR3_TOBAC^Q:771-286,H:467-628^72.2%ID^E:4e-60^RecName: Full=Pleiotropic drug resistance protein 3;^Eukaryota; Viridiplantae; Streptophyta; Embryophyta; Tracheophyta; Spermatophyta; Magnoliophyta; eudicotyledons; Gunneridae; Pentapetalae; asterids; lamiids; Solanales; Solanaceae; Nicotianoideae; Nicotianeae; Nicotiana`PDR3_TOBAC^PDR3_TOBAC^Q:290-24,H:654-742^70.8%ID^E:7.3e-30^RecName: …	.	TRINITY_DN76734_c1_g2_i15.p1	199-765[-]	PDR3_TOBAC^PDR3_TOBAC^Q:5-160,H:473-628^74.4%ID^E:7.8e-60^RecName: Full=Pleiotropic drug resistance protein 3;^Eukaryota; Viridiplantae; Streptophyta; Embryophyta; Tracheophyta; Spermatophyta; Magnoliophyta; eudicotyledons; Gunneridae; Pentapetalae; asterids; lamiids; Solanales; Solanaceae; Nicotianoideae; Nicotianeae; Nicotiana	PF01061.23^ABC2_membrane^ABC-2 type transporter^56-174^E:4.4e-12	.	ExpAA=59.26^PredHel=2^Topology=i72-94o109-131i	.	KEGG:nta:107764055`KEGG:nta:107812050	GO:0016021^cellular_component^integral component of membrane`GO:0005524^molecular_function^ATP binding`GO:0016887^molecular_function^ATPase activity	GO:0016020^cellular_component^membrane	.	.
TRINITY_DN76734_c1_g2	TRINITY_DN76734_c1_g2_i1	PDR3_TOBAC^PDR3_TOBAC^Q:1280-24,H:324-742^73.5%ID^E:7.5e-181^RecName: Full=Pleiotropic drug resistance protein 3;^Eukaryota; Viridiplantae; Streptophyta; Embryophyta; Tracheophyta; Spermatophyta; Magnoliophyta; eudicotyledons; Gunneridae; Pentapetalae; asterids; lamiids; Solanales; Solanaceae; Nicotianoideae; Nicotianeae; Nicotiana	.	TRINITY_DN76734_c1_g2_i1.p1	3-1232[-]	AB37G_ARATH^AB37G_ARATH^Q:1-404,H:342-745^72.8%ID^E:4.6e-174^RecName: Full=ABC transporter G family member 37;^Eukaryota; Viridiplantae; Streptophyta; Embryophyta; Tracheophyta; Spermatophyta; Magnoliophyta; eudicotyledons; Gunneridae; Pentapetalae; rosids; malvids; Brassicales; Brassicaceae; Camelineae; Arabidopsis	PF01061.23^ABC2_membrane^ABC-2 type transporter^185-396^E:1.6e-35	.	ExpAA=112.17^PredHel=5^Topology=i201-223o238-260i272-294o316-338i345-367o	COG0842^(ABC) transporter	KEGG:ath:AT3G53480	GO:0016021^cellular_component^integral component of membrane`GO:0005886^cellular_component^plasma membrane`GO:0009506^cellular_component^plasmodesma`GO:0005524^molecular_function^ATP binding`GO:0042626^molecular_function^ATPase activity, coupled to transmembrane movement of substances`GO:0005215^molecular_function^transporter activity`GO:0009926^biological_process^auxin polar transport`GO:0071366…	GO:0016020^cellular_component^membrane	.	.
TRINITY_DN76734_c1_g2	TRINITY_DN76734_c1_g2_i3	PDR3_TOBAC^PDR3_TOBAC^Q:1278-370,H:325-627^72.3%ID^E:1e-123^RecName: Full=Pleiotropic drug resistance protein 3;^Eukaryota; Viridiplantae; Streptophyta; Embryophyta; Tracheophyta; Spermatophyta; Magnoliophyta; eudicotyledons; Gunneridae; Pentapetalae; asterids; lamiids; Solanales; Solanaceae; Nicotianoideae; Nicotianeae; Nicotiana`PDR3_TOBAC^PDR3_TOBAC^Q:431-24,H:607-742^64.7%ID^E:3.3e-50^RecName…	.	TRINITY_DN76734_c1_g2_i3.p1	304-1152[-]	PDR3_TOBAC^PDR3_TOBAC^Q:1-261,H:367-627^69.3%ID^E:2.1e-101^RecName: Full=Pleiotropic drug resistance protein 3;^Eukaryota; Viridiplantae; Streptophyta; Embryophyta; Tracheophyta; Spermatophyta; Magnoliophyta; eudicotyledons; Gunneridae; Pentapetalae; asterids; lamiids; Solanales; Solanaceae; Nicotianoideae; Nicotianeae; Nicotiana	.	.	ExpAA=44.95^PredHel=2^Topology=i174-196o211-233i	.	KEGG:nta:107764055`KEGG:nta:107812050	GO:0016021^cellular_component^integral component of membrane`GO:0005524^molecular_function^ATP binding`GO:0016887^molecular_function^ATPase activity	.	.	.
TRINITY_DN76734_c1_g2	TRINITY_DN76734_c1_g2_i4	AB37G_ARATH^AB37G_ARATH^Q:1035-481,H:472-656^71.9%ID^E:7.1e-73^RecName: Full=ABC transporter G family member 37;^Eukaryota; Viridiplantae; Streptophyta; Embryophyta; Tracheophyta; Spermatophyta; Magnoliophyta; eudicotyledons; Gunneridae; Pentapetalae; rosids; malvids; Brassicales; Brassicaceae; Camelineae; Arabidopsis`AB37G_ARATH^AB37G_ARATH^Q:464-21,H:587-745^46%ID^E:3.4e-27^RecName: Full=ABC tr…	.	TRINITY_DN76734_c1_g2_i4.p1	478-1038[-]	AB37G_ARATH^AB37G_ARATH^Q:2-186,H:472-656^71.9%ID^E:1.4e-72^RecName: Full=ABC transporter G family member 37;^Eukaryota; Viridiplantae; Streptophyta; Embryophyta; Tracheophyta; Spermatophyta; Magnoliophyta; eudicotyledons; Gunneridae; Pentapetalae; rosids; malvids; Brassicales; Brassicaceae; Camelineae; Arabidopsis	PF01061.23^ABC2_membrane^ABC-2 type transporter^56-182^E:4.6e-19	.	ExpAA=61.69^PredHel=3^Topology=i72-94o109-131i143-165o	COG0842^(ABC) transporter	KEGG:ath:AT3G53480	GO:0016021^cellular_component^integral component of membrane`GO:0005886^cellular_component^plasma membrane`GO:0009506^cellular_component^plasmodesma`GO:0005524^molecular_function^ATP binding`GO:0042626^molecular_function^ATPase activity, coupled to transmembrane movement of substances`GO:0005215^molecular_function^transporter activity`GO:0009926^biological_process^auxin polar transport`GO:0071366…	GO:0016020^cellular_component^membrane	.	.
TRINITY_DN76734_c1_g2	TRINITY_DN76734_c1_g2_i5	PDR3_TOBAC^PDR3_TOBAC^Q:1397-24,H:285-742^74.5%ID^E:1.9e-201^RecName: Full=Pleiotropic drug resistance protein 3;^Eukaryota; Viridiplantae; Streptophyta; Embryophyta; Tracheophyta; Spermatophyta; Magnoliophyta; eudicotyledons; Gunneridae; Pentapetalae; asterids; lamiids; Solanales; Solanaceae; Nicotianoideae; Nicotianeae; Nicotiana	.	TRINITY_DN76734_c1_g2_i5.p1	3-1451[-]	PDR3_TOBAC^PDR3_TOBAC^Q:19-476,H:285-742^74.5%ID^E:1.8e-201^RecName: Full=Pleiotropic drug resistance protein 3;^Eukaryota; Viridiplantae; Streptophyta; Embryophyta; Tracheophyta; Spermatophyta; Magnoliophyta; eudicotyledons; Gunneridae; Pentapetalae; asterids; lamiids; Solanales; Solanaceae; Nicotianoideae; Nicotianeae; Nicotiana	PF01061.23^ABC2_membrane^ABC-2 type transporter^258-469^E:6.9e-36	.	ExpAA=110.38^PredHel=5^Topology=o275-297i304-326o350-372i393-410o420-439i	.	KEGG:nta:107764055`KEGG:nta:107812050	GO:0016021^cellular_component^integral component of membrane`GO:0005524^molecular_function^ATP binding`GO:0016887^molecular_function^ATPase activity	GO:0016020^cellular_component^membrane	.	.
TRINITY_DN76734_c1_g2	TRINITY_DN76734_c1_g2_i6	PDR3_TOBAC^PDR3_TOBAC^Q:851-24,H:467-742^69.6%ID^E:1.9e-108^RecName: Full=Pleiotropic drug resistance protein 3;^Eukaryota; Viridiplantae; Streptophyta; Embryophyta; Tracheophyta; Spermatophyta; Magnoliophyta; eudicotyledons; Gunneridae; Pentapetalae; asterids; lamiids; Solanales; Solanaceae; Nicotianoideae; Nicotianeae; Nicotiana	.	TRINITY_DN76734_c1_g2_i6.p1	3-845[-]	PDR3_TOBAC^PDR3_TOBAC^Q:5-274,H:473-742^70.7%ID^E:6.7e-108^RecName: Full=Pleiotropic drug resistance protein 3;^Eukaryota; Viridiplantae; Streptophyta; Embryophyta; Tracheophyta; Spermatophyta; Magnoliophyta; eudicotyledons; Gunneridae; Pentapetalae; asterids; lamiids; Solanales; Solanaceae; Nicotianoideae; Nicotianeae; Nicotiana	PF01061.23^ABC2_membrane^ABC-2 type transporter^56-267^E:5.3e-36	.	ExpAA=112.20^PredHel=5^Topology=i72-94o109-131i143-165o187-209i216-238o	.	KEGG:nta:107764055`KEGG:nta:107812050	GO:0016021^cellular_component^integral component of membrane`GO:0005524^molecular_function^ATP binding`GO:0016887^molecular_function^ATPase activity	GO:0016020^cellular_component^membrane	.	.
TRINITY_DN76758_c0_g1	TRINITY_DN76758_c0_g1_i4	TRY7_ANOGA^TRY7_ANOGA^Q:61-798,H:11-255^43.8%ID^E:3.1e-54^RecName: Full=Trypsin-7;^Eukaryota; Metazoa; Ecdysozoa; Arthropoda; Hexapoda; Insecta; Pterygota; Neoptera; Holometabola; Diptera; Nematocera; Culicoidea; Culicidae; Anophelinae; Anopheles	.	TRINITY_DN76758_c0_g1_i4.p1	1-801[+]	TRY1_ANOGA^TRY1_ANOGA^Q:16-266,H:8-262^42.2%ID^E:2.2e-52^RecName: Full=Trypsin-1;^Eukaryota; Metazoa; Ecdysozoa; Arthropoda; Hexapoda; Insecta; Pterygota; Neoptera; Holometabola; Diptera; Nematocera; Culicoidea; Culicidae; Anophelinae; Anopheles	PF00089.25^Trypsin^Trypsin^49-266^E:4.2e-57`PF13365.5^Trypsin_2^Trypsin-like peptidase domain^76-238^E:1e-06	sigP:1^31^0.451^YES	.	COG5640^protease	KEGG:aga:AgaP_AGAP008296`KO:K01312	GO:0005737^cellular_component^cytoplasm`GO:0005576^cellular_component^extracellular region`GO:0004252^molecular_function^serine-type endopeptidase activity`GO:0007586^biological_process^digestion	GO:0004252^molecular_function^serine-type endopeptidase activity`GO:0006508^biological_process^proteolysis	.	.
TRINITY_DN76758_c0_g1	TRINITY_DN76758_c0_g1_i5	TRY7_ANOGA^TRY7_ANOGA^Q:61-687,H:11-263^35.8%ID^E:3.2e-36^RecName: Full=Trypsin-7;^Eukaryota; Metazoa; Ecdysozoa; Arthropoda; Hexapoda; Insecta; Pterygota; Neoptera; Holometabola; Diptera; Nematocera; Culicoidea; Culicidae; Anophelinae; Anopheles	.	TRINITY_DN76758_c0_g1_i5.p1	1-306[+]	TRY3_AEDAE^TRY3_AEDAE^Q:46-93,H:25-72^62.5%ID^E:2.3e-10^RecName: Full=Trypsin 3A1;^Eukaryota; Metazoa; Ecdysozoa; Arthropoda; Hexapoda; Insecta; Pterygota; Neoptera; Holometabola; Diptera; Nematocera; Culicoidea; Culicidae; Culicinae; Aedini; Aedes; Stegomyia	PF00089.25^Trypsin^Trypsin^49-93^E:7.3e-12	sigP:1^31^0.451^YES	.	COG5640^protease	KEGG:aag:5569681	GO:0005615^cellular_component^extracellular space`GO:0004252^molecular_function^serine-type endopeptidase activity`GO:0007586^biological_process^digestion	GO:0004252^molecular_function^serine-type endopeptidase activity`GO:0006508^biological_process^proteolysis	.	.
TRINITY_DN76758_c0_g1	TRINITY_DN76758_c0_g1_i6	TRY1_ANOGA^TRY1_ANOGA^Q:17-661,H:8-226^37.8%ID^E:1.7e-37^RecName: Full=Trypsin-1;^Eukaryota; Metazoa; Ecdysozoa; Arthropoda; Hexapoda; Insecta; Pterygota; Neoptera; Holometabola; Diptera; Nematocera; Culicoidea; Culicidae; Anophelinae; Anopheles	.	TRINITY_DN76758_c0_g1_i6.p1	2-661[+]	TRY3_AEDAE^TRY3_AEDAE^Q:36-220,H:25-206^39.5%ID^E:3e-31^RecName: Full=Trypsin 3A1;^Eukaryota; Metazoa; Ecdysozoa; Arthropoda; Hexapoda; Insecta; Pterygota; Neoptera; Holometabola; Diptera; Nematocera; Culicoidea; Culicidae; Culicinae; Aedini; Aedes; Stegomyia	PF00089.25^Trypsin^Trypsin^39-220^E:2.4e-39	sigP:1^21^0.629^YES	.	COG5640^protease	KEGG:aag:5569681	GO:0005615^cellular_component^extracellular space`GO:0004252^molecular_function^serine-type endopeptidase activity`GO:0007586^biological_process^digestion	GO:0004252^molecular_function^serine-type endopeptidase activity`GO:0006508^biological_process^proteolysis	.	.
TRINITY_DN76758_c0_g1	TRINITY_DN76758_c0_g1_i7	TRY1_ANOGA^TRY1_ANOGA^Q:22-810,H:6-272^40%ID^E:7.5e-55^RecName: Full=Trypsin-1;^Eukaryota; Metazoa; Ecdysozoa; Arthropoda; Hexapoda; Insecta; Pterygota; Neoptera; Holometabola; Diptera; Nematocera; Culicoidea; Culicidae; Anophelinae; Anopheles	.	TRINITY_DN76758_c0_g1_i7.p1	70-834[+]	TRY1_ANOGA^TRY1_ANOGA^Q:1-247,H:29-272^42.1%ID^E:2.7e-55^RecName: Full=Trypsin-1;^Eukaryota; Metazoa; Ecdysozoa; Arthropoda; Hexapoda; Insecta; Pterygota; Neoptera; Holometabola; Diptera; Nematocera; Culicoidea; Culicidae; Anophelinae; Anopheles	PF00089.25^Trypsin^Trypsin^20-243^E:5.1e-61	.	.	COG5640^protease	KEGG:aga:AgaP_AGAP008296`KO:K01312	GO:0005737^cellular_component^cytoplasm`GO:0005576^cellular_component^extracellular region`GO:0004252^molecular_function^serine-type endopeptidase activity`GO:0007586^biological_process^digestion	GO:0004252^molecular_function^serine-type endopeptidase activity`GO:0006508^biological_process^proteolysis	.	.
TRINITY_DN76758_c0_g1	TRINITY_DN76758_c0_g1_i25	TRY1_ANOGA^TRY1_ANOGA^Q:17-799,H:8-272^43.3%ID^E:1.1e-57^RecName: Full=Trypsin-1;^Eukaryota; Metazoa; Ecdysozoa; Arthropoda; Hexapoda; Insecta; Pterygota; Neoptera; Holometabola; Diptera; Nematocera; Culicoidea; Culicidae; Anophelinae; Anopheles	.	TRINITY_DN76758_c0_g1_i25.p1	2-808[+]	TRY1_ANOGA^TRY1_ANOGA^Q:6-266,H:8-272^43.3%ID^E:2.7e-58^RecName: Full=Trypsin-1;^Eukaryota; Metazoa; Ecdysozoa; Arthropoda; Hexapoda; Insecta; Pterygota; Neoptera; Holometabola; Diptera; Nematocera; Culicoidea; Culicidae; Anophelinae; Anopheles	PF00089.25^Trypsin^Trypsin^39-262^E:4.5e-62	sigP:1^21^0.629^YES	.	COG5640^protease	KEGG:aga:AgaP_AGAP008296`KO:K01312	GO:0005737^cellular_component^cytoplasm`GO:0005576^cellular_component^extracellular region`GO:0004252^molecular_function^serine-type endopeptidase activity`GO:0007586^biological_process^digestion	GO:0004252^molecular_function^serine-type endopeptidase activity`GO:0006508^biological_process^proteolysis	.	.
TRINITY_DN76758_c0_g1	TRINITY_DN76758_c0_g1_i2	TRY1_ANOGA^TRY1_ANOGA^Q:109-795,H:47-272^46.3%ID^E:3.6e-56^RecName: Full=Trypsin-1;^Eukaryota; Metazoa; Ecdysozoa; Arthropoda; Hexapoda; Insecta; Pterygota; Neoptera; Holometabola; Diptera; Nematocera; Culicoidea; Culicidae; Anophelinae; Anopheles	.	TRINITY_DN76758_c0_g1_i2.p1	1-804[+]	TRY1_ANOGA^TRY1_ANOGA^Q:37-265,H:47-272^46.3%ID^E:8.8e-57^RecName: Full=Trypsin-1;^Eukaryota; Metazoa; Ecdysozoa; Arthropoda; Hexapoda; Insecta; Pterygota; Neoptera; Holometabola; Diptera; Nematocera; Culicoidea; Culicidae; Anophelinae; Anopheles	PF00089.25^Trypsin^Trypsin^38-261^E:1.1e-60	sigP:1^20^0.693^YES	.	COG5640^protease	KEGG:aga:AgaP_AGAP008296`KO:K01312	GO:0005737^cellular_component^cytoplasm`GO:0005576^cellular_component^extracellular region`GO:0004252^molecular_function^serine-type endopeptidase activity`GO:0007586^biological_process^digestion	GO:0004252^molecular_function^serine-type endopeptidase activity`GO:0006508^biological_process^proteolysis	.	.
TRINITY_DN76758_c0_g1	TRINITY_DN76758_c0_g1_i3	TRY1_ANOGA^TRY1_ANOGA^Q:406-696,H:176-272^47.4%ID^E:1.6e-22^RecName: Full=Trypsin-1;^Eukaryota; Metazoa; Ecdysozoa; Arthropoda; Hexapoda; Insecta; Pterygota; Neoptera; Holometabola; Diptera; Nematocera; Culicoidea; Culicidae; Anophelinae; Anopheles`TRY1_ANOGA^TRY1_ANOGA^Q:17-349,H:8-125^38.1%ID^E:2.5e-12^RecName: Full=Trypsin-1;^Eukaryota; Metazoa; Ecdysozoa; Arthropoda; Hexapoda; Insecta; Pteryg…	.	.	.	.	.	.	.	COG5640^protease	KEGG:aga:AgaP_AGAP008296`KO:K01312	GO:0005737^cellular_component^cytoplasm`GO:0005576^cellular_component^extracellular region`GO:0004252^molecular_function^serine-type endopeptidase activity`GO:0007586^biological_process^digestion	.	.	.
TRINITY_DN76758_c0_g1	TRINITY_DN76758_c0_g1_i24	TRY1_ANOGA^TRY1_ANOGA^Q:435-725,H:176-272^47.4%ID^E:1.6e-22^RecName: Full=Trypsin-1;^Eukaryota; Metazoa; Ecdysozoa; Arthropoda; Hexapoda; Insecta; Pterygota; Neoptera; Holometabola; Diptera; Nematocera; Culicoidea; Culicidae; Anophelinae; Anopheles`TRY1_ANOGA^TRY1_ANOGA^Q:46-378,H:8-125^39%ID^E:9.7e-12^RecName: Full=Trypsin-1;^Eukaryota; Metazoa; Ecdysozoa; Arthropoda; Hexapoda; Insecta; Pterygot…	.	TRINITY_DN76758_c0_g1_i24.p1	1-306[+]	TRY3_AEDAE^TRY3_AEDAE^Q:46-93,H:25-72^62.5%ID^E:2.3e-10^RecName: Full=Trypsin 3A1;^Eukaryota; Metazoa; Ecdysozoa; Arthropoda; Hexapoda; Insecta; Pterygota; Neoptera; Holometabola; Diptera; Nematocera; Culicoidea; Culicidae; Culicinae; Aedini; Aedes; Stegomyia	PF00089.25^Trypsin^Trypsin^49-93^E:7.3e-12	sigP:1^31^0.451^YES	.	COG5640^protease	KEGG:aag:5569681	GO:0005615^cellular_component^extracellular space`GO:0004252^molecular_function^serine-type endopeptidase activity`GO:0007586^biological_process^digestion	GO:0004252^molecular_function^serine-type endopeptidase activity`GO:0006508^biological_process^proteolysis	.	.
TRINITY_DN76758_c0_g1	TRINITY_DN76758_c0_g1_i8	TRY3_ANOGA^TRY3_ANOGA^Q:41-664,H:24-273^33.6%ID^E:2e-35^RecName: Full=Trypsin-3;^Eukaryota; Metazoa; Ecdysozoa; Arthropoda; Hexapoda; Insecta; Pterygota; Neoptera; Holometabola; Diptera; Nematocera; Culicoidea; Culicidae; Anophelinae; Anopheles	.	.	.	.	.	.	.	COG5640^protease	KEGG:aga:AgaP_AGAP008294`KO:K01312	GO:0005737^cellular_component^cytoplasm`GO:0005576^cellular_component^extracellular region`GO:0004252^molecular_function^serine-type endopeptidase activity`GO:0007586^biological_process^digestion	.	.	.
TRINITY_DN76758_c0_g1	TRINITY_DN76758_c0_g1_i9	TRY1_ANOGA^TRY1_ANOGA^Q:2-256,H:172-256^52.9%ID^E:1.1e-21^RecName: Full=Trypsin-1;^Eukaryota; Metazoa; Ecdysozoa; Arthropoda; Hexapoda; Insecta; Pterygota; Neoptera; Holometabola; Diptera; Nematocera; Culicoidea; Culicidae; Anophelinae; Anopheles	.	.	.	.	.	.	.	COG5640^protease	KEGG:aga:AgaP_AGAP008296`KO:K01312	GO:0005737^cellular_component^cytoplasm`GO:0005576^cellular_component^extracellular region`GO:0004252^molecular_function^serine-type endopeptidase activity`GO:0007586^biological_process^digestion	.	.	.
TRINITY_DN76758_c0_g1	TRINITY_DN76758_c0_g1_i23	TRY1_ANOGA^TRY1_ANOGA^Q:64-795,H:32-272^44.3%ID^E:3e-56^RecName: Full=Trypsin-1;^Eukaryota; Metazoa; Ecdysozoa; Arthropoda; Hexapoda; Insecta; Pterygota; Neoptera; Holometabola; Diptera; Nematocera; Culicoidea; Culicidae; Anophelinae; Anopheles	.	TRINITY_DN76758_c0_g1_i23.p1	1-804[+]	TRY1_ANOGA^TRY1_ANOGA^Q:22-265,H:32-272^44.3%ID^E:2e-56^RecName: Full=Trypsin-1;^Eukaryota; Metazoa; Ecdysozoa; Arthropoda; Hexapoda; Insecta; Pterygota; Neoptera; Holometabola; Diptera; Nematocera; Culicoidea; Culicidae; Anophelinae; Anopheles	PF00089.25^Trypsin^Trypsin^38-261^E:2.1e-60	sigP:1^20^0.628^YES	.	COG5640^protease	KEGG:aga:AgaP_AGAP008296`KO:K01312	GO:0005737^cellular_component^cytoplasm`GO:0005576^cellular_component^extracellular region`GO:0004252^molecular_function^serine-type endopeptidase activity`GO:0007586^biological_process^digestion	GO:0004252^molecular_function^serine-type endopeptidase activity`GO:0006508^biological_process^proteolysis	.	.
TRINITY_DN76758_c0_g1	TRINITY_DN76758_c0_g1_i22	TRY1_ANOGA^TRY1_ANOGA^Q:22-810,H:6-272^41.5%ID^E:1.4e-56^RecName: Full=Trypsin-1;^Eukaryota; Metazoa; Ecdysozoa; Arthropoda; Hexapoda; Insecta; Pterygota; Neoptera; Holometabola; Diptera; Nematocera; Culicoidea; Culicidae; Anophelinae; Anopheles	.	TRINITY_DN76758_c0_g1_i22.p1	70-819[+]	TRY1_ANOGA^TRY1_ANOGA^Q:1-247,H:29-272^43.7%ID^E:6.3e-57^RecName: Full=Trypsin-1;^Eukaryota; Metazoa; Ecdysozoa; Arthropoda; Hexapoda; Insecta; Pterygota; Neoptera; Holometabola; Diptera; Nematocera; Culicoidea; Culicidae; Anophelinae; Anopheles	PF00089.25^Trypsin^Trypsin^20-243^E:4.8e-62	.	.	COG5640^protease	KEGG:aga:AgaP_AGAP008296`KO:K01312	GO:0005737^cellular_component^cytoplasm`GO:0005576^cellular_component^extracellular region`GO:0004252^molecular_function^serine-type endopeptidase activity`GO:0007586^biological_process^digestion	GO:0004252^molecular_function^serine-type endopeptidase activity`GO:0006508^biological_process^proteolysis	.	.
TRINITY_DN76758_c0_g1	TRINITY_DN76758_c0_g1_i21	TRY7_ANOGA^TRY7_ANOGA^Q:31-768,H:11-255^43%ID^E:4.3e-53^RecName: Full=Trypsin-7;^Eukaryota; Metazoa; Ecdysozoa; Arthropoda; Hexapoda; Insecta; Pterygota; Neoptera; Holometabola; Diptera; Nematocera; Culicoidea; Culicidae; Anophelinae; Anopheles	.	TRINITY_DN76758_c0_g1_i21.p1	1-771[+]	TRY1_ANOGA^TRY1_ANOGA^Q:23-256,H:32-262^44%ID^E:1.3e-52^RecName: Full=Trypsin-1;^Eukaryota; Metazoa; Ecdysozoa; Arthropoda; Hexapoda; Insecta; Pterygota; Neoptera; Holometabola; Diptera; Nematocera; Culicoidea; Culicidae; Anophelinae; Anopheles	PF00089.25^Trypsin^Trypsin^39-256^E:1e-57`PF13365.5^Trypsin_2^Trypsin-like peptidase domain^66-228^E:2.4e-07	sigP:1^21^0.584^YES	.	COG5640^protease	KEGG:aga:AgaP_AGAP008296`KO:K01312	GO:0005737^cellular_component^cytoplasm`GO:0005576^cellular_component^extracellular region`GO:0004252^molecular_function^serine-type endopeptidase activity`GO:0007586^biological_process^digestion	GO:0004252^molecular_function^serine-type endopeptidase activity`GO:0006508^biological_process^proteolysis	.	.
TRINITY_DN76758_c0_g1	TRINITY_DN76758_c0_g1_i30	TRY7_ANOGA^TRY7_ANOGA^Q:61-822,H:11-263^43.6%ID^E:2.9e-57^RecName: Full=Trypsin-7;^Eukaryota; Metazoa; Ecdysozoa; Arthropoda; Hexapoda; Insecta; Pterygota; Neoptera; Holometabola; Diptera; Nematocera; Culicoidea; Culicidae; Anophelinae; Anopheles	.	TRINITY_DN76758_c0_g1_i30.p1	1-837[+]	TRY1_ANOGA^TRY1_ANOGA^Q:16-276,H:8-272^42.5%ID^E:1.2e-56^RecName: Full=Trypsin-1;^Eukaryota; Metazoa; Ecdysozoa; Arthropoda; Hexapoda; Insecta; Pterygota; Neoptera; Holometabola; Diptera; Nematocera; Culicoidea; Culicidae; Anophelinae; Anopheles	PF00089.25^Trypsin^Trypsin^49-272^E:1.7e-61	sigP:1^31^0.451^YES	.	COG5640^protease	KEGG:aga:AgaP_AGAP008296`KO:K01312	GO:0005737^cellular_component^cytoplasm`GO:0005576^cellular_component^extracellular region`GO:0004252^molecular_function^serine-type endopeptidase activity`GO:0007586^biological_process^digestion	GO:0004252^molecular_function^serine-type endopeptidase activity`GO:0006508^biological_process^proteolysis	.	.
TRINITY_DN76758_c0_g1	TRINITY_DN76758_c0_g1_i31	TRY1_ANOGA^TRY1_ANOGA^Q:109-795,H:47-272^45.9%ID^E:4.5e-56^RecName: Full=Trypsin-1;^Eukaryota; Metazoa; Ecdysozoa; Arthropoda; Hexapoda; Insecta; Pterygota; Neoptera; Holometabola; Diptera; Nematocera; Culicoidea; Culicidae; Anophelinae; Anopheles	.	TRINITY_DN76758_c0_g1_i31.p1	1-804[+]	TRY1_ANOGA^TRY1_ANOGA^Q:37-265,H:47-272^45.9%ID^E:4.4e-56^RecName: Full=Trypsin-1;^Eukaryota; Metazoa; Ecdysozoa; Arthropoda; Hexapoda; Insecta; Pterygota; Neoptera; Holometabola; Diptera; Nematocera; Culicoidea; Culicidae; Anophelinae; Anopheles	PF00089.25^Trypsin^Trypsin^38-261^E:1.3e-59`PF13365.5^Trypsin_2^Trypsin-like peptidase domain^65-227^E:9.1e-07	sigP:1^20^0.693^YES	.	COG5640^protease	KEGG:aga:AgaP_AGAP008296`KO:K01312	GO:0005737^cellular_component^cytoplasm`GO:0005576^cellular_component^extracellular region`GO:0004252^molecular_function^serine-type endopeptidase activity`GO:0007586^biological_process^digestion	GO:0004252^molecular_function^serine-type endopeptidase activity`GO:0006508^biological_process^proteolysis	.	.
TRINITY_DN76758_c0_g1	TRINITY_DN76758_c0_g1_i18	TRY1_ANOGA^TRY1_ANOGA^Q:46-834,H:8-274^42.2%ID^E:1.5e-56^RecName: Full=Trypsin-1;^Eukaryota; Metazoa; Ecdysozoa; Arthropoda; Hexapoda; Insecta; Pterygota; Neoptera; Holometabola; Diptera; Nematocera; Culicoidea; Culicidae; Anophelinae; Anopheles	.	TRINITY_DN76758_c0_g1_i18.p1	1-837[+]	TRY1_ANOGA^TRY1_ANOGA^Q:16-278,H:8-274^42.2%ID^E:1.2e-56^RecName: Full=Trypsin-1;^Eukaryota; Metazoa; Ecdysozoa; Arthropoda; Hexapoda; Insecta; Pterygota; Neoptera; Holometabola; Diptera; Nematocera; Culicoidea; Culicidae; Anophelinae; Anopheles	PF00089.25^Trypsin^Trypsin^49-272^E:8e-61	sigP:1^31^0.451^YES	.	COG5640^protease	KEGG:aga:AgaP_AGAP008296`KO:K01312	GO:0005737^cellular_component^cytoplasm`GO:0005576^cellular_component^extracellular region`GO:0004252^molecular_function^serine-type endopeptidase activity`GO:0007586^biological_process^digestion	GO:0004252^molecular_function^serine-type endopeptidase activity`GO:0006508^biological_process^proteolysis	.	.
TRINITY_DN76758_c0_g1	TRINITY_DN76758_c0_g1_i19	TRY1_ANOGA^TRY1_ANOGA^Q:64-795,H:32-272^44.7%ID^E:1.6e-56^RecName: Full=Trypsin-1;^Eukaryota; Metazoa; Ecdysozoa; Arthropoda; Hexapoda; Insecta; Pterygota; Neoptera; Holometabola; Diptera; Nematocera; Culicoidea; Culicidae; Anophelinae; Anopheles	.	TRINITY_DN76758_c0_g1_i19.p1	1-804[+]	TRY1_ANOGA^TRY1_ANOGA^Q:22-265,H:32-272^44.7%ID^E:3.9e-57^RecName: Full=Trypsin-1;^Eukaryota; Metazoa; Ecdysozoa; Arthropoda; Hexapoda; Insecta; Pterygota; Neoptera; Holometabola; Diptera; Nematocera; Culicoidea; Culicidae; Anophelinae; Anopheles	PF00089.25^Trypsin^Trypsin^38-261^E:2.4e-62`PF13365.5^Trypsin_2^Trypsin-like peptidase domain^65-227^E:7.6e-07	sigP:1^20^0.627^YES	.	COG5640^protease	KEGG:aga:AgaP_AGAP008296`KO:K01312	GO:0005737^cellular_component^cytoplasm`GO:0005576^cellular_component^extracellular region`GO:0004252^molecular_function^serine-type endopeptidase activity`GO:0007586^biological_process^digestion	GO:0004252^molecular_function^serine-type endopeptidase activity`GO:0006508^biological_process^proteolysis	.	.
TRINITY_DN76758_c0_g1	TRINITY_DN76758_c0_g1_i16	TRY7_ANOGA^TRY7_ANOGA^Q:43-780,H:11-255^43%ID^E:2.2e-52^RecName: Full=Trypsin-7;^Eukaryota; Metazoa; Ecdysozoa; Arthropoda; Hexapoda; Insecta; Pterygota; Neoptera; Holometabola; Diptera; Nematocera; Culicoidea; Culicidae; Anophelinae; Anopheles	.	TRINITY_DN76758_c0_g1_i16.p1	70-783[+]	TRY1_ANOGA^TRY1_ANOGA^Q:1-237,H:29-262^43.5%ID^E:1.2e-52^RecName: Full=Trypsin-1;^Eukaryota; Metazoa; Ecdysozoa; Arthropoda; Hexapoda; Insecta; Pterygota; Neoptera; Holometabola; Diptera; Nematocera; Culicoidea; Culicidae; Anophelinae; Anopheles	PF00089.25^Trypsin^Trypsin^20-237^E:1.2e-57`PF13365.5^Trypsin_2^Trypsin-like peptidase domain^47-209^E:2.4e-07	.	.	COG5640^protease	KEGG:aga:AgaP_AGAP008296`KO:K01312	GO:0005737^cellular_component^cytoplasm`GO:0005576^cellular_component^extracellular region`GO:0004252^molecular_function^serine-type endopeptidase activity`GO:0007586^biological_process^digestion	GO:0004252^molecular_function^serine-type endopeptidase activity`GO:0006508^biological_process^proteolysis	.	.
TRINITY_DN76758_c0_g1	TRINITY_DN76758_c0_g1_i17	TRY7_ANOGA^TRY7_ANOGA^Q:31-582,H:11-194^37.4%ID^E:1.2e-28^RecName: Full=Trypsin-7;^Eukaryota; Metazoa; Ecdysozoa; Arthropoda; Hexapoda; Insecta; Pterygota; Neoptera; Holometabola; Diptera; Nematocera; Culicoidea; Culicidae; Anophelinae; Anopheles	.	TRINITY_DN76758_c0_g1_i17.p1	1-582[+]	TRY3_AEDAE^TRY3_AEDAE^Q:36-192,H:25-178^40.8%ID^E:1.2e-26^RecName: Full=Trypsin 3A1;^Eukaryota; Metazoa; Ecdysozoa; Arthropoda; Hexapoda; Insecta; Pterygota; Neoptera; Holometabola; Diptera; Nematocera; Culicoidea; Culicidae; Culicinae; Aedini; Aedes; Stegomyia	PF00089.25^Trypsin^Trypsin^39-194^E:1.4e-34	sigP:1^21^0.584^YES	.	COG5640^protease	KEGG:aag:5569681	GO:0005615^cellular_component^extracellular space`GO:0004252^molecular_function^serine-type endopeptidase activity`GO:0007586^biological_process^digestion	GO:0004252^molecular_function^serine-type endopeptidase activity`GO:0006508^biological_process^proteolysis	.	.
TRINITY_DN76758_c0_g1	TRINITY_DN76758_c0_g1_i29	TRY1_ANOGA^TRY1_ANOGA^Q:108-794,H:47-272^46.3%ID^E:3.1e-56^RecName: Full=Trypsin-1;^Eukaryota; Metazoa; Ecdysozoa; Arthropoda; Hexapoda; Insecta; Pterygota; Neoptera; Holometabola; Diptera; Nematocera; Culicoidea; Culicidae; Anophelinae; Anopheles	.	TRINITY_DN76758_c0_g1_i29.p1	12-803[+]	TRY1_ANOGA^TRY1_ANOGA^Q:33-261,H:47-272^46.3%ID^E:2.5e-56^RecName: Full=Trypsin-1;^Eukaryota; Metazoa; Ecdysozoa; Arthropoda; Hexapoda; Insecta; Pterygota; Neoptera; Holometabola; Diptera; Nematocera; Culicoidea; Culicidae; Anophelinae; Anopheles	PF00089.25^Trypsin^Trypsin^34-257^E:3.6e-60	sigP:1^16^0.742^YES	.	COG5640^protease	KEGG:aga:AgaP_AGAP008296`KO:K01312	GO:0005737^cellular_component^cytoplasm`GO:0005576^cellular_component^extracellular region`GO:0004252^molecular_function^serine-type endopeptidase activity`GO:0007586^biological_process^digestion	GO:0004252^molecular_function^serine-type endopeptidase activity`GO:0006508^biological_process^proteolysis	.	.
TRINITY_DN76758_c0_g1	TRINITY_DN76758_c0_g1_i15	TRY7_ANOGA^TRY7_ANOGA^Q:43-594,H:11-194^36.9%ID^E:2.8e-28^RecName: Full=Trypsin-7;^Eukaryota; Metazoa; Ecdysozoa; Arthropoda; Hexapoda; Insecta; Pterygota; Neoptera; Holometabola; Diptera; Nematocera; Culicoidea; Culicidae; Anophelinae; Anopheles	.	TRINITY_DN76758_c0_g1_i15.p1	70-594[+]	TRY3_AEDAE^TRY3_AEDAE^Q:17-173,H:25-178^40.8%ID^E:6.2e-27^RecName: Full=Trypsin 3A1;^Eukaryota; Metazoa; Ecdysozoa; Arthropoda; Hexapoda; Insecta; Pterygota; Neoptera; Holometabola; Diptera; Nematocera; Culicoidea; Culicidae; Culicinae; Aedini; Aedes; Stegomyia	PF00089.25^Trypsin^Trypsin^20-175^E:1.7e-34	.	.	COG5640^protease	KEGG:aag:5569681	GO:0005615^cellular_component^extracellular space`GO:0004252^molecular_function^serine-type endopeptidase activity`GO:0007586^biological_process^digestion	GO:0004252^molecular_function^serine-type endopeptidase activity`GO:0006508^biological_process^proteolysis	.	.
TRINITY_DN76758_c0_g1	TRINITY_DN76758_c0_g1_i14	TRY1_ANOGA^TRY1_ANOGA^Q:64-795,H:32-272^44.3%ID^E:8.2e-57^RecName: Full=Trypsin-1;^Eukaryota; Metazoa; Ecdysozoa; Arthropoda; Hexapoda; Insecta; Pterygota; Neoptera; Holometabola; Diptera; Nematocera; Culicoidea; Culicidae; Anophelinae; Anopheles	.	TRINITY_DN76758_c0_g1_i14.p1	1-804[+]	TRY1_ANOGA^TRY1_ANOGA^Q:22-265,H:32-272^44.3%ID^E:8.8e-57^RecName: Full=Trypsin-1;^Eukaryota; Metazoa; Ecdysozoa; Arthropoda; Hexapoda; Insecta; Pterygota; Neoptera; Holometabola; Diptera; Nematocera; Culicoidea; Culicidae; Anophelinae; Anopheles	PF00089.25^Trypsin^Trypsin^38-261^E:4e-62`PF13365.5^Trypsin_2^Trypsin-like peptidase domain^65-227^E:7.7e-07	sigP:1^20^0.627^YES	.	COG5640^protease	KEGG:aga:AgaP_AGAP008296`KO:K01312	GO:0005737^cellular_component^cytoplasm`GO:0005576^cellular_component^extracellular region`GO:0004252^molecular_function^serine-type endopeptidase activity`GO:0007586^biological_process^digestion	GO:0004252^molecular_function^serine-type endopeptidase activity`GO:0006508^biological_process^proteolysis	.	.
TRINITY_DN76758_c0_g1	TRINITY_DN76758_c0_g1_i11	TRY1_ANOGA^TRY1_ANOGA^Q:67-798,H:32-272^44.3%ID^E:6.3e-57^RecName: Full=Trypsin-1;^Eukaryota; Metazoa; Ecdysozoa; Arthropoda; Hexapoda; Insecta; Pterygota; Neoptera; Holometabola; Diptera; Nematocera; Culicoidea; Culicidae; Anophelinae; Anopheles	.	TRINITY_DN76758_c0_g1_i11.p1	1-807[+]	TRY1_ANOGA^TRY1_ANOGA^Q:23-266,H:32-272^44.3%ID^E:5.2e-57^RecName: Full=Trypsin-1;^Eukaryota; Metazoa; Ecdysozoa; Arthropoda; Hexapoda; Insecta; Pterygota; Neoptera; Holometabola; Diptera; Nematocera; Culicoidea; Culicidae; Anophelinae; Anopheles	PF00089.25^Trypsin^Trypsin^39-262^E:4.1e-62	sigP:1^21^0.584^YES	.	COG5640^protease	KEGG:aga:AgaP_AGAP008296`KO:K01312	GO:0005737^cellular_component^cytoplasm`GO:0005576^cellular_component^extracellular region`GO:0004252^molecular_function^serine-type endopeptidase activity`GO:0007586^biological_process^digestion	GO:0004252^molecular_function^serine-type endopeptidase activity`GO:0006508^biological_process^proteolysis	.	.
TRINITY_DN76758_c0_g1	TRINITY_DN76758_c0_g1_i28	TRY1_ANOGA^TRY1_ANOGA^Q:46-828,H:8-272^42.9%ID^E:1.1e-56^RecName: Full=Trypsin-1;^Eukaryota; Metazoa; Ecdysozoa; Arthropoda; Hexapoda; Insecta; Pterygota; Neoptera; Holometabola; Diptera; Nematocera; Culicoidea; Culicidae; Anophelinae; Anopheles	.	TRINITY_DN76758_c0_g1_i28.p1	1-837[+]	TRY1_ANOGA^TRY1_ANOGA^Q:16-276,H:8-272^42.9%ID^E:9.1e-57^RecName: Full=Trypsin-1;^Eukaryota; Metazoa; Ecdysozoa; Arthropoda; Hexapoda; Insecta; Pterygota; Neoptera; Holometabola; Diptera; Nematocera; Culicoidea; Culicidae; Anophelinae; Anopheles	PF00089.25^Trypsin^Trypsin^49-272^E:4.6e-60	sigP:1^31^0.451^YES	.	COG5640^protease	KEGG:aga:AgaP_AGAP008296`KO:K01312	GO:0005737^cellular_component^cytoplasm`GO:0005576^cellular_component^extracellular region`GO:0004252^molecular_function^serine-type endopeptidase activity`GO:0007586^biological_process^digestion	GO:0004252^molecular_function^serine-type endopeptidase activity`GO:0006508^biological_process^proteolysis	.	.
TRINITY_DN76758_c0_g1	TRINITY_DN76758_c0_g1_i13	TRY1_ANOGA^TRY1_ANOGA^Q:67-804,H:32-274^42.7%ID^E:7.1e-56^RecName: Full=Trypsin-1;^Eukaryota; Metazoa; Ecdysozoa; Arthropoda; Hexapoda; Insecta; Pterygota; Neoptera; Holometabola; Diptera; Nematocera; Culicoidea; Culicidae; Anophelinae; Anopheles	.	TRINITY_DN76758_c0_g1_i13.p1	1-807[+]	TRY1_ANOGA^TRY1_ANOGA^Q:23-268,H:32-274^42.7%ID^E:5.7e-56^RecName: Full=Trypsin-1;^Eukaryota; Metazoa; Ecdysozoa; Arthropoda; Hexapoda; Insecta; Pterygota; Neoptera; Holometabola; Diptera; Nematocera; Culicoidea; Culicidae; Anophelinae; Anopheles	PF00089.25^Trypsin^Trypsin^39-262^E:3.3e-61	sigP:1^21^0.584^YES	.	COG5640^protease	KEGG:aga:AgaP_AGAP008296`KO:K01312	GO:0005737^cellular_component^cytoplasm`GO:0005576^cellular_component^extracellular region`GO:0004252^molecular_function^serine-type endopeptidase activity`GO:0007586^biological_process^digestion	GO:0004252^molecular_function^serine-type endopeptidase activity`GO:0006508^biological_process^proteolysis	.	.
TRINITY_DN76758_c0_g1	TRINITY_DN76758_c0_g1_i27	TRY1_ANOGA^TRY1_ANOGA^Q:3-332,H:136-245^45.5%ID^E:2.6e-23^RecName: Full=Trypsin-1;^Eukaryota; Metazoa; Ecdysozoa; Arthropoda; Hexapoda; Insecta; Pterygota; Neoptera; Holometabola; Diptera; Nematocera; Culicoidea; Culicidae; Anophelinae; Anopheles	.	TRINITY_DN76758_c0_g1_i27.p1	3-332[+]	TRY1_ANOGA^TRY1_ANOGA^Q:1-110,H:136-245^45.5%ID^E:2.6e-23^RecName: Full=Trypsin-1;^Eukaryota; Metazoa; Ecdysozoa; Arthropoda; Hexapoda; Insecta; Pterygota; Neoptera; Holometabola; Diptera; Nematocera; Culicoidea; Culicidae; Anophelinae; Anopheles	PF00089.25^Trypsin^Trypsin^1-110^E:2.5e-25	.	.	COG5640^protease	KEGG:aga:AgaP_AGAP008296`KO:K01312	GO:0005737^cellular_component^cytoplasm`GO:0005576^cellular_component^extracellular region`GO:0004252^molecular_function^serine-type endopeptidase activity`GO:0007586^biological_process^digestion	GO:0004252^molecular_function^serine-type endopeptidase activity`GO:0006508^biological_process^proteolysis	.	.
TRINITY_DN76758_c0_g1	TRINITY_DN76758_c0_g1_i26	TRY1_ANOGA^TRY1_ANOGA^Q:109-714,H:47-245^44.6%ID^E:1.8e-45^RecName: Full=Trypsin-1;^Eukaryota; Metazoa; Ecdysozoa; Arthropoda; Hexapoda; Insecta; Pterygota; Neoptera; Holometabola; Diptera; Nematocera; Culicoidea; Culicidae; Anophelinae; Anopheles	.	TRINITY_DN76758_c0_g1_i26.p1	1-714[+]	TRY1_ANOGA^TRY1_ANOGA^Q:37-238,H:47-245^44.6%ID^E:1.8e-45^RecName: Full=Trypsin-1;^Eukaryota; Metazoa; Ecdysozoa; Arthropoda; Hexapoda; Insecta; Pterygota; Neoptera; Holometabola; Diptera; Nematocera; Culicoidea; Culicidae; Anophelinae; Anopheles	PF00089.25^Trypsin^Trypsin^38-238^E:4.3e-51	sigP:1^20^0.693^YES	.	COG5640^protease	KEGG:aga:AgaP_AGAP008296`KO:K01312	GO:0005737^cellular_component^cytoplasm`GO:0005576^cellular_component^extracellular region`GO:0004252^molecular_function^serine-type endopeptidase activity`GO:0007586^biological_process^digestion	GO:0004252^molecular_function^serine-type endopeptidase activity`GO:0006508^biological_process^proteolysis	.	.
TRINITY_DN76770_c1_g3	TRINITY_DN76770_c1_g3_i2	GLUA_DICDI^GLUA_DICDI^Q:564-839,H:80-188^38.4%ID^E:1.2e-08^RecName: Full=Lysosomal beta glucosidase;^Eukaryota; Amoebozoa; Mycetozoa; Dictyostelids; Dictyosteliales; Dictyosteliaceae; Dictyostelium	.	TRINITY_DN76770_c1_g3_i2.p1	438-839[+]	GLUA_DICDI^GLUA_DICDI^Q:43-134,H:80-188^38.4%ID^E:5.8e-09^RecName: Full=Lysosomal beta glucosidase;^Eukaryota; Amoebozoa; Mycetozoa; Dictyostelids; Dictyosteliales; Dictyosteliaceae; Dictyostelium	PF00933.20^Glyco_hydro_3^Glycosyl hydrolase family 3 N terminal domain^51-131^E:8e-08	sigP:1^26^0.842^YES	ExpAA=20.50^PredHel=1^Topology=o10-32i	COG1472^hydrolase family 3	KEGG:ddi:DDB_G0292810`KO:K05349	GO:0005764^cellular_component^lysosome`GO:0005886^cellular_component^plasma membrane`GO:0008422^molecular_function^beta-glucosidase activity`GO:0102483^molecular_function^scopolin beta-glucosidase activity`GO:0009251^biological_process^glucan catabolic process	GO:0004553^molecular_function^hydrolase activity, hydrolyzing O-glycosyl compounds`GO:0005975^biological_process^carbohydrate metabolic process	.	.
TRINITY_DN76770_c1_g3	TRINITY_DN76770_c1_g3_i1	GLUA_DICDI^GLUA_DICDI^Q:310-585,H:80-188^38.4%ID^E:8.5e-09^RecName: Full=Lysosomal beta glucosidase;^Eukaryota; Amoebozoa; Mycetozoa; Dictyostelids; Dictyosteliales; Dictyosteliaceae; Dictyostelium	.	TRINITY_DN76770_c1_g3_i1.p1	184-585[+]	GLUA_DICDI^GLUA_DICDI^Q:43-134,H:80-188^38.4%ID^E:5.8e-09^RecName: Full=Lysosomal beta glucosidase;^Eukaryota; Amoebozoa; Mycetozoa; Dictyostelids; Dictyosteliales; Dictyosteliaceae; Dictyostelium	PF00933.20^Glyco_hydro_3^Glycosyl hydrolase family 3 N terminal domain^51-131^E:8e-08	sigP:1^26^0.842^YES	ExpAA=20.50^PredHel=1^Topology=o10-32i	COG1472^hydrolase family 3	KEGG:ddi:DDB_G0292810`KO:K05349	GO:0005764^cellular_component^lysosome`GO:0005886^cellular_component^plasma membrane`GO:0008422^molecular_function^beta-glucosidase activity`GO:0102483^molecular_function^scopolin beta-glucosidase activity`GO:0009251^biological_process^glucan catabolic process	GO:0004553^molecular_function^hydrolase activity, hydrolyzing O-glycosyl compounds`GO:0005975^biological_process^carbohydrate metabolic process	.	.
TRINITY_DN76770_c1_g2	TRINITY_DN76770_c1_g2_i8	Y2309_ARATH^Y2309_ARATH^Q:194-340,H:1-49^89.8%ID^E:6.4e-17^RecName: Full=Uncharacterized protein At2g23090;^Eukaryota; Viridiplantae; Streptophyta; Embryophyta; Tracheophyta; Spermatophyta; Magnoliophyta; eudicotyledons; Gunneridae; Pentapetalae; rosids; malvids; Brassicales; Brassicaceae; Camelineae; Arabidopsis	.	TRINITY_DN76770_c1_g2_i8.p1	40-342[-]	.	.	.	ExpAA=25.01^PredHel=1^Topology=o10-32i	.	.	.	.	.	.
TRINITY_DN76770_c1_g2	TRINITY_DN76770_c1_g2_i1	.	.	.	.	.	.	.	.	.	.	.	.	.	.
TRINITY_DN76770_c1_g2	TRINITY_DN76770_c1_g2_i2	Y2309_ARATH^Y2309_ARATH^Q:104-250,H:1-49^89.8%ID^E:4.7e-17^RecName: Full=Uncharacterized protein At2g23090;^Eukaryota; Viridiplantae; Streptophyta; Embryophyta; Tracheophyta; Spermatophyta; Magnoliophyta; eudicotyledons; Gunneridae; Pentapetalae; rosids; malvids; Brassicales; Brassicaceae; Camelineae; Arabidopsis	.	.	.	.	.	.	.	ENOG411250G^4F5 protein family	KEGG:ath:AT2G23090	.	.	.	.
TRINITY_DN76770_c1_g2	TRINITY_DN76770_c1_g2_i3	.	.	.	.	.	.	.	.	.	.	.	.	.	.
TRINITY_DN76770_c1_g2	TRINITY_DN76770_c1_g2_i4	.	.	.	.	.	.	.	.	.	.	.	.	.	.
TRINITY_DN76770_c1_g2	TRINITY_DN76770_c1_g2_i5	Y2309_ARATH^Y2309_ARATH^Q:82-228,H:1-49^89.8%ID^E:4.3e-17^RecName: Full=Uncharacterized protein At2g23090;^Eukaryota; Viridiplantae; Streptophyta; Embryophyta; Tracheophyta; Spermatophyta; Magnoliophyta; eudicotyledons; Gunneridae; Pentapetalae; rosids; malvids; Brassicales; Brassicaceae; Camelineae; Arabidopsis	.	.	.	.	.	.	.	ENOG411250G^4F5 protein family	KEGG:ath:AT2G23090	.	.	.	.
TRINITY_DN76770_c1_g2	TRINITY_DN76770_c1_g2_i6	.	.	.	.	.	.	.	.	.	.	.	.	.	.
TRINITY_DN76782_c6_g2	TRINITY_DN76782_c6_g2_i1	.	.	TRINITY_DN76782_c6_g2_i1.p1	3-1322[-]	.	.	.	.	.	.	.	.	.	.
TRINITY_DN76761_c3_g1	TRINITY_DN76761_c3_g1_i9	PP117_ARATH^PP117_ARATH^Q:804-2387,H:25-568^62.6%ID^E:1.2e-66^RecName: Full=Pentatricopeptide repeat-containing protein At1g73400, mitochondrial;^Eukaryota; Viridiplantae; Streptophyta; Embryophyta; Tracheophyta; Spermatophyta; Magnoliophyta; eudicotyledons; Gunneridae; Pentapetalae; rosids; malvids; Brassicales; Brassicaceae; Camelineae; Arabidopsis	.	TRINITY_DN76761_c3_g1_i9.p1	648-2390[+]	PP117_ARATH^PP117_ARATH^Q:53-580,H:25-568^62.6%ID^E:2e-66^RecName: Full=Pentatricopeptide repeat-containing protein At1g73400, mitochondrial;^Eukaryota; Viridiplantae; Streptophyta; Embryophyta; Tracheophyta; Spermatophyta; Magnoliophyta; eudicotyledons; Gunneridae; Pentapetalae; rosids; malvids; Brassicales; Brassicaceae; Camelineae; Arabidopsis	PF13041.5^PPR_2^PPR repeat family^244-292^E:7.1e-08`PF01535.19^PPR^PPR repeat^249-274^E:0.0046`PF13041.5^PPR_2^PPR repeat family^278-327^E:1.5e-10`PF01535.19^PPR^PPR repeat^282-310^E:0.0056`PF12854.6^PPR_1^PPR repeat^310-342^E:7.4e-11`PF13041.5^PPR_2^PPR repeat family^313-363^E:3.3e-10`PF01535.19^PPR^PPR repeat^316-345^E:1.9e-06`PF13041.5^PPR_2^PPR repeat family^352-399^E:5.5e-10`PF01535.19^PPR^P…	.	.	ENOG410Z7Z7^Pentatricopeptide repeat-containing protein	KEGG:ath:AT1G73400	GO:0043231^cellular_component^intracellular membrane-bounded organelle`GO:0005739^cellular_component^mitochondrion`GO:0004519^molecular_function^endonuclease activity`GO:0003723^molecular_function^RNA binding`GO:0009451^biological_process^RNA modification	.	.	.
TRINITY_DN76761_c3_g1	TRINITY_DN76761_c3_g1_i8	PP117_ARATH^PP117_ARATH^Q:804-2387,H:25-568^62.6%ID^E:1.5e-66^RecName: Full=Pentatricopeptide repeat-containing protein At1g73400, mitochondrial;^Eukaryota; Viridiplantae; Streptophyta; Embryophyta; Tracheophyta; Spermatophyta; Magnoliophyta; eudicotyledons; Gunneridae; Pentapetalae; rosids; malvids; Brassicales; Brassicaceae; Camelineae; Arabidopsis	.	TRINITY_DN76761_c3_g1_i8.p1	648-2390[+]	PP117_ARATH^PP117_ARATH^Q:53-580,H:25-568^62.6%ID^E:2e-66^RecName: Full=Pentatricopeptide repeat-containing protein At1g73400, mitochondrial;^Eukaryota; Viridiplantae; Streptophyta; Embryophyta; Tracheophyta; Spermatophyta; Magnoliophyta; eudicotyledons; Gunneridae; Pentapetalae; rosids; malvids; Brassicales; Brassicaceae; Camelineae; Arabidopsis	PF13041.5^PPR_2^PPR repeat family^244-292^E:7.1e-08`PF01535.19^PPR^PPR repeat^249-274^E:0.0046`PF13041.5^PPR_2^PPR repeat family^278-327^E:1.5e-10`PF01535.19^PPR^PPR repeat^282-310^E:0.0056`PF12854.6^PPR_1^PPR repeat^310-342^E:7.4e-11`PF13041.5^PPR_2^PPR repeat family^313-363^E:3.3e-10`PF01535.19^PPR^PPR repeat^316-345^E:1.9e-06`PF13041.5^PPR_2^PPR repeat family^352-399^E:5.5e-10`PF01535.19^PPR^P…	.	.	ENOG410Z7Z7^Pentatricopeptide repeat-containing protein	KEGG:ath:AT1G73400	GO:0043231^cellular_component^intracellular membrane-bounded organelle`GO:0005739^cellular_component^mitochondrion`GO:0004519^molecular_function^endonuclease activity`GO:0003723^molecular_function^RNA binding`GO:0009451^biological_process^RNA modification	.	.	.
TRINITY_DN76761_c3_g1	TRINITY_DN76761_c3_g1_i3	PP117_ARATH^PP117_ARATH^Q:805-2388,H:25-568^62.6%ID^E:1.5e-66^RecName: Full=Pentatricopeptide repeat-containing protein At1g73400, mitochondrial;^Eukaryota; Viridiplantae; Streptophyta; Embryophyta; Tracheophyta; Spermatophyta; Magnoliophyta; eudicotyledons; Gunneridae; Pentapetalae; rosids; malvids; Brassicales; Brassicaceae; Camelineae; Arabidopsis	.	TRINITY_DN76761_c3_g1_i3.p1	649-2391[+]	PP117_ARATH^PP117_ARATH^Q:53-580,H:25-568^62.6%ID^E:2e-66^RecName: Full=Pentatricopeptide repeat-containing protein At1g73400, mitochondrial;^Eukaryota; Viridiplantae; Streptophyta; Embryophyta; Tracheophyta; Spermatophyta; Magnoliophyta; eudicotyledons; Gunneridae; Pentapetalae; rosids; malvids; Brassicales; Brassicaceae; Camelineae; Arabidopsis	PF13041.5^PPR_2^PPR repeat family^244-292^E:7.1e-08`PF01535.19^PPR^PPR repeat^249-274^E:0.0046`PF13041.5^PPR_2^PPR repeat family^278-327^E:1.5e-10`PF01535.19^PPR^PPR repeat^282-310^E:0.0056`PF12854.6^PPR_1^PPR repeat^310-342^E:7.4e-11`PF13041.5^PPR_2^PPR repeat family^313-363^E:3.3e-10`PF01535.19^PPR^PPR repeat^316-345^E:1.9e-06`PF13041.5^PPR_2^PPR repeat family^352-399^E:5.5e-10`PF01535.19^PPR^P…	.	.	ENOG410Z7Z7^Pentatricopeptide repeat-containing protein	KEGG:ath:AT1G73400	GO:0043231^cellular_component^intracellular membrane-bounded organelle`GO:0005739^cellular_component^mitochondrion`GO:0004519^molecular_function^endonuclease activity`GO:0003723^molecular_function^RNA binding`GO:0009451^biological_process^RNA modification	.	.	.
TRINITY_DN76761_c3_g1	TRINITY_DN76761_c3_g1_i2	PP117_ARATH^PP117_ARATH^Q:526-2109,H:25-568^62.4%ID^E:2.5e-66^RecName: Full=Pentatricopeptide repeat-containing protein At1g73400, mitochondrial;^Eukaryota; Viridiplantae; Streptophyta; Embryophyta; Tracheophyta; Spermatophyta; Magnoliophyta; eudicotyledons; Gunneridae; Pentapetalae; rosids; malvids; Brassicales; Brassicaceae; Camelineae; Arabidopsis	.	TRINITY_DN76761_c3_g1_i2.p1	370-2112[+]	PP117_ARATH^PP117_ARATH^Q:53-580,H:25-568^62.4%ID^E:4.5e-66^RecName: Full=Pentatricopeptide repeat-containing protein At1g73400, mitochondrial;^Eukaryota; Viridiplantae; Streptophyta; Embryophyta; Tracheophyta; Spermatophyta; Magnoliophyta; eudicotyledons; Gunneridae; Pentapetalae; rosids; malvids; Brassicales; Brassicaceae; Camelineae; Arabidopsis	PF13041.5^PPR_2^PPR repeat family^244-292^E:7.1e-08`PF01535.19^PPR^PPR repeat^249-274^E:0.0046`PF13041.5^PPR_2^PPR repeat family^278-327^E:1.5e-10`PF01535.19^PPR^PPR repeat^282-310^E:0.0056`PF12854.6^PPR_1^PPR repeat^310-342^E:7.4e-11`PF13041.5^PPR_2^PPR repeat family^313-363^E:3.3e-10`PF01535.19^PPR^PPR repeat^316-345^E:1.9e-06`PF13041.5^PPR_2^PPR repeat family^352-399^E:5.5e-10`PF01535.19^PPR^P…	.	.	ENOG410Z7Z7^Pentatricopeptide repeat-containing protein	KEGG:ath:AT1G73400	GO:0043231^cellular_component^intracellular membrane-bounded organelle`GO:0005739^cellular_component^mitochondrion`GO:0004519^molecular_function^endonuclease activity`GO:0003723^molecular_function^RNA binding`GO:0009451^biological_process^RNA modification	.	.	.
TRINITY_DN76761_c3_g1	TRINITY_DN76761_c3_g1_i1	PP117_ARATH^PP117_ARATH^Q:794-2377,H:25-568^62.6%ID^E:1.2e-66^RecName: Full=Pentatricopeptide repeat-containing protein At1g73400, mitochondrial;^Eukaryota; Viridiplantae; Streptophyta; Embryophyta; Tracheophyta; Spermatophyta; Magnoliophyta; eudicotyledons; Gunneridae; Pentapetalae; rosids; malvids; Brassicales; Brassicaceae; Camelineae; Arabidopsis	.	TRINITY_DN76761_c3_g1_i1.p1	638-2380[+]	PP117_ARATH^PP117_ARATH^Q:53-580,H:25-568^62.6%ID^E:2e-66^RecName: Full=Pentatricopeptide repeat-containing protein At1g73400, mitochondrial;^Eukaryota; Viridiplantae; Streptophyta; Embryophyta; Tracheophyta; Spermatophyta; Magnoliophyta; eudicotyledons; Gunneridae; Pentapetalae; rosids; malvids; Brassicales; Brassicaceae; Camelineae; Arabidopsis	PF13041.5^PPR_2^PPR repeat family^244-292^E:7.1e-08`PF01535.19^PPR^PPR repeat^249-274^E:0.0046`PF13041.5^PPR_2^PPR repeat family^278-327^E:1.5e-10`PF01535.19^PPR^PPR repeat^282-310^E:0.0056`PF12854.6^PPR_1^PPR repeat^310-342^E:7.4e-11`PF13041.5^PPR_2^PPR repeat family^313-363^E:3.3e-10`PF01535.19^PPR^PPR repeat^316-345^E:1.9e-06`PF13041.5^PPR_2^PPR repeat family^352-399^E:5.5e-10`PF01535.19^PPR^P…	.	.	ENOG410Z7Z7^Pentatricopeptide repeat-containing protein	KEGG:ath:AT1G73400	GO:0043231^cellular_component^intracellular membrane-bounded organelle`GO:0005739^cellular_component^mitochondrion`GO:0004519^molecular_function^endonuclease activity`GO:0003723^molecular_function^RNA binding`GO:0009451^biological_process^RNA modification	.	.	.
TRINITY_DN76761_c3_g1	TRINITY_DN76761_c3_g1_i7	.	.	.	.	.	.	.	.	.	.	.	.	.	.
TRINITY_DN76761_c3_g1	TRINITY_DN76761_c3_g1_i6	PP117_ARATH^PP117_ARATH^Q:805-2388,H:25-568^62.6%ID^E:1.2e-66^RecName: Full=Pentatricopeptide repeat-containing protein At1g73400, mitochondrial;^Eukaryota; Viridiplantae; Streptophyta; Embryophyta; Tracheophyta; Spermatophyta; Magnoliophyta; eudicotyledons; Gunneridae; Pentapetalae; rosids; malvids; Brassicales; Brassicaceae; Camelineae; Arabidopsis	.	TRINITY_DN76761_c3_g1_i6.p1	649-2391[+]	PP117_ARATH^PP117_ARATH^Q:53-580,H:25-568^62.6%ID^E:2e-66^RecName: Full=Pentatricopeptide repeat-containing protein At1g73400, mitochondrial;^Eukaryota; Viridiplantae; Streptophyta; Embryophyta; Tracheophyta; Spermatophyta; Magnoliophyta; eudicotyledons; Gunneridae; Pentapetalae; rosids; malvids; Brassicales; Brassicaceae; Camelineae; Arabidopsis	PF13041.5^PPR_2^PPR repeat family^244-292^E:7.1e-08`PF01535.19^PPR^PPR repeat^249-274^E:0.0046`PF13041.5^PPR_2^PPR repeat family^278-327^E:1.5e-10`PF01535.19^PPR^PPR repeat^282-310^E:0.0056`PF12854.6^PPR_1^PPR repeat^310-342^E:7.4e-11`PF13041.5^PPR_2^PPR repeat family^313-363^E:3.3e-10`PF01535.19^PPR^PPR repeat^316-345^E:1.9e-06`PF13041.5^PPR_2^PPR repeat family^352-399^E:5.5e-10`PF01535.19^PPR^P…	.	.	ENOG410Z7Z7^Pentatricopeptide repeat-containing protein	KEGG:ath:AT1G73400	GO:0043231^cellular_component^intracellular membrane-bounded organelle`GO:0005739^cellular_component^mitochondrion`GO:0004519^molecular_function^endonuclease activity`GO:0003723^molecular_function^RNA binding`GO:0009451^biological_process^RNA modification	.	.	.
TRINITY_DN76761_c3_g1	TRINITY_DN76761_c3_g1_i5	PP117_ARATH^PP117_ARATH^Q:805-2388,H:25-568^62.6%ID^E:1.3e-66^RecName: Full=Pentatricopeptide repeat-containing protein At1g73400, mitochondrial;^Eukaryota; Viridiplantae; Streptophyta; Embryophyta; Tracheophyta; Spermatophyta; Magnoliophyta; eudicotyledons; Gunneridae; Pentapetalae; rosids; malvids; Brassicales; Brassicaceae; Camelineae; Arabidopsis	.	TRINITY_DN76761_c3_g1_i5.p1	649-2391[+]	PP117_ARATH^PP117_ARATH^Q:53-580,H:25-568^62.6%ID^E:2e-66^RecName: Full=Pentatricopeptide repeat-containing protein At1g73400, mitochondrial;^Eukaryota; Viridiplantae; Streptophyta; Embryophyta; Tracheophyta; Spermatophyta; Magnoliophyta; eudicotyledons; Gunneridae; Pentapetalae; rosids; malvids; Brassicales; Brassicaceae; Camelineae; Arabidopsis	PF13041.5^PPR_2^PPR repeat family^244-292^E:7.1e-08`PF01535.19^PPR^PPR repeat^249-274^E:0.0046`PF13041.5^PPR_2^PPR repeat family^278-327^E:1.5e-10`PF01535.19^PPR^PPR repeat^282-310^E:0.0056`PF12854.6^PPR_1^PPR repeat^310-342^E:7.4e-11`PF13041.5^PPR_2^PPR repeat family^313-363^E:3.3e-10`PF01535.19^PPR^PPR repeat^316-345^E:1.9e-06`PF13041.5^PPR_2^PPR repeat family^352-399^E:5.5e-10`PF01535.19^PPR^P…	.	.	ENOG410Z7Z7^Pentatricopeptide repeat-containing protein	KEGG:ath:AT1G73400	GO:0043231^cellular_component^intracellular membrane-bounded organelle`GO:0005739^cellular_component^mitochondrion`GO:0004519^molecular_function^endonuclease activity`GO:0003723^molecular_function^RNA binding`GO:0009451^biological_process^RNA modification	.	.	.
TRINITY_DN76761_c3_g1	TRINITY_DN76761_c3_g1_i4	PP117_ARATH^PP117_ARATH^Q:795-2378,H:25-568^62.6%ID^E:1.4e-66^RecName: Full=Pentatricopeptide repeat-containing protein At1g73400, mitochondrial;^Eukaryota; Viridiplantae; Streptophyta; Embryophyta; Tracheophyta; Spermatophyta; Magnoliophyta; eudicotyledons; Gunneridae; Pentapetalae; rosids; malvids; Brassicales; Brassicaceae; Camelineae; Arabidopsis	.	TRINITY_DN76761_c3_g1_i4.p1	639-2381[+]	PP117_ARATH^PP117_ARATH^Q:53-580,H:25-568^62.6%ID^E:2e-66^RecName: Full=Pentatricopeptide repeat-containing protein At1g73400, mitochondrial;^Eukaryota; Viridiplantae; Streptophyta; Embryophyta; Tracheophyta; Spermatophyta; Magnoliophyta; eudicotyledons; Gunneridae; Pentapetalae; rosids; malvids; Brassicales; Brassicaceae; Camelineae; Arabidopsis	PF13041.5^PPR_2^PPR repeat family^244-292^E:7.1e-08`PF01535.19^PPR^PPR repeat^249-274^E:0.0046`PF13041.5^PPR_2^PPR repeat family^278-327^E:1.5e-10`PF01535.19^PPR^PPR repeat^282-310^E:0.0056`PF12854.6^PPR_1^PPR repeat^310-342^E:7.4e-11`PF13041.5^PPR_2^PPR repeat family^313-363^E:3.3e-10`PF01535.19^PPR^PPR repeat^316-345^E:1.9e-06`PF13041.5^PPR_2^PPR repeat family^352-399^E:5.5e-10`PF01535.19^PPR^P…	.	.	ENOG410Z7Z7^Pentatricopeptide repeat-containing protein	KEGG:ath:AT1G73400	GO:0043231^cellular_component^intracellular membrane-bounded organelle`GO:0005739^cellular_component^mitochondrion`GO:0004519^molecular_function^endonuclease activity`GO:0003723^molecular_function^RNA binding`GO:0009451^biological_process^RNA modification	.	.	.
TRINITY_DN76761_c1_g1	TRINITY_DN76761_c1_g1_i4	.	.	TRINITY_DN76761_c1_g1_i4.p1	186-515[-]	.	.	.	.	.	.	.	.	.	.
TRINITY_DN76761_c1_g1	TRINITY_DN76761_c1_g1_i1	.	.	TRINITY_DN76761_c1_g1_i1.p2	2-298[+]	.	.	.	ExpAA=22.86^PredHel=1^Topology=i43-65o	.	.	.	.	.	.
TRINITY_DN76761_c1_g1	TRINITY_DN76761_c1_g1_i3	.	.	TRINITY_DN76761_c1_g1_i3.p1	3-410[-]	.	.	.	.	.	.	.	.	.	.
TRINITY_DN76761_c1_g1	TRINITY_DN76761_c1_g1_i2	.	.	.	.	.	.	.	.	.	.	.	.	.	.
TRINITY_DN76760_c3_g1	TRINITY_DN76760_c3_g1_i2	.	.	TRINITY_DN76760_c3_g1_i2.p1	72-506[+]	.	.	.	ExpAA=90.10^PredHel=4^Topology=i21-43o53-75i80-102o122-144i	.	.	.	.	.	.
TRINITY_DN76760_c3_g1	TRINITY_DN76760_c3_g1_i1	.	.	TRINITY_DN76760_c3_g1_i1.p1	72-506[+]	.	.	.	ExpAA=90.10^PredHel=4^Topology=i21-43o53-75i80-102o122-144i	.	.	.	.	.	.
TRINITY_DN76760_c3_g3	TRINITY_DN76760_c3_g3_i1	.	.	TRINITY_DN76760_c3_g3_i1.p1	1-303[+]	.	.	.	ExpAA=44.74^PredHel=2^Topology=i7-29o44-66i	.	.	.	.	.	.
TRINITY_DN76760_c2_g1	TRINITY_DN76760_c2_g1_i2	.	.	TRINITY_DN76760_c2_g1_i2.p1	24-734[+]	.	PF10523.8^BEN^BEN domain^146-225^E:3.5e-05	.	.	.	.	.	.	.	.
TRINITY_DN76760_c2_g1	TRINITY_DN76760_c2_g1_i1	.	.	TRINITY_DN76760_c2_g1_i1.p1	2-793[+]	.	PF10523.8^BEN^BEN domain^173-252^E:4.3e-05	.	.	.	.	.	.	.	.
TRINITY_DN76754_c3_g2	TRINITY_DN76754_c3_g2_i2	.	.	TRINITY_DN76754_c3_g2_i2.p1	266-586[-]	.	.	.	.	.	.	.	.	.	.
TRINITY_DN76754_c3_g2	TRINITY_DN76754_c3_g2_i3	.	.	.	.	.	.	.	.	.	.	.	.	.	.
TRINITY_DN76754_c3_g2	TRINITY_DN76754_c3_g2_i1	.	.	TRINITY_DN76754_c3_g2_i1.p1	352-1410[+]	.	PF06101.10^Vps62^Vacuolar protein sorting-associated protein 62^20-353^E:2.4e-144	.	.	.	.	.	.	.	.
TRINITY_DN76754_c2_g2	TRINITY_DN76754_c2_g2_i2	.	.	TRINITY_DN76754_c2_g2_i2.p1	669-971[+]	.	.	.	ExpAA=43.87^PredHel=2^Topology=o4-26i65-87o	.	.	.	.	.	.
TRINITY_DN76754_c2_g2	TRINITY_DN76754_c2_g2_i1	.	.	TRINITY_DN76754_c2_g2_i1.p1	696-998[+]	.	.	.	ExpAA=43.87^PredHel=2^Topology=o4-26i65-87o	.	.	.	.	.	.
TRINITY_DN76732_c4_g1	TRINITY_DN76732_c4_g1_i14	RQL4A_ARATH^RQL4A_ARATH^Q:4383-652,H:21-1187^58.7%ID^E:0^RecName: Full=ATP-dependent DNA helicase Q-like 4A;^Eukaryota; Viridiplantae; Streptophyta; Embryophyta; Tracheophyta; Spermatophyta; Magnoliophyta; eudicotyledons; Gunneridae; Pentapetalae; rosids; malvids; Brassicales; Brassicaceae; Camelineae; Arabidopsis	.	TRINITY_DN76732_c4_g1_i14.p1	1240-4449[-]	RQL4A_ARATH^RQL4A_ARATH^Q:23-1027,H:21-1020^64.6%ID^E:0^RecName: Full=ATP-dependent DNA helicase Q-like 4A;^Eukaryota; Viridiplantae; Streptophyta; Embryophyta; Tracheophyta; Spermatophyta; Magnoliophyta; eudicotyledons; Gunneridae; Pentapetalae; rosids; malvids; Brassicales; Brassicaceae; Camelineae; Arabidopsis	PF00270.28^DEAD^DEAD/DEAH box helicase^461-629^E:3.2e-18`PF00271.30^Helicase_C^Helicase conserved C-terminal domain^666-772^E:1.1e-17`PF16124.4^RecQ_Zn_bind^RecQ zinc-binding^784-866^E:6e-16`PF09382.9^RQC^RQC domain^873-988^E:8.8e-22	.	ExpAA=22.51^PredHel=1^Topology=o1039-1061i	COG0514^atp-dependent dna helicase	KEGG:ath:AT1G10930`KO:K10901	GO:0005694^cellular_component^chromosome`GO:0005737^cellular_component^cytoplasm`GO:0005634^cellular_component^nucleus`GO:0009506^cellular_component^plasmodesma`GO:0043138^molecular_function^3'-5' DNA helicase activity`GO:0005524^molecular_function^ATP binding`GO:0043140^molecular_function^ATP-dependent 3'-5' DNA helicase activity`GO:0003677^molecular_function^DNA binding`GO:0009378^molecular_fun…	GO:0003676^molecular_function^nucleic acid binding`GO:0005524^molecular_function^ATP binding`GO:0043140^molecular_function^ATP-dependent 3'-5' DNA helicase activity`GO:0006260^biological_process^DNA replication`GO:0006281^biological_process^DNA repair	.	.
TRINITY_DN76732_c4_g1	TRINITY_DN76732_c4_g1_i15	RQL4A_ARATH^RQL4A_ARATH^Q:4792-1502,H:21-1049^61.3%ID^E:0^RecName: Full=ATP-dependent DNA helicase Q-like 4A;^Eukaryota; Viridiplantae; Streptophyta; Embryophyta; Tracheophyta; Spermatophyta; Magnoliophyta; eudicotyledons; Gunneridae; Pentapetalae; rosids; malvids; Brassicales; Brassicaceae; Camelineae; Arabidopsis	.	TRINITY_DN76732_c4_g1_i15.p1	1649-4858[-]	RQL4A_ARATH^RQL4A_ARATH^Q:23-1027,H:21-1020^64.6%ID^E:0^RecName: Full=ATP-dependent DNA helicase Q-like 4A;^Eukaryota; Viridiplantae; Streptophyta; Embryophyta; Tracheophyta; Spermatophyta; Magnoliophyta; eudicotyledons; Gunneridae; Pentapetalae; rosids; malvids; Brassicales; Brassicaceae; Camelineae; Arabidopsis	PF00270.28^DEAD^DEAD/DEAH box helicase^461-629^E:3.2e-18`PF00271.30^Helicase_C^Helicase conserved C-terminal domain^666-772^E:1.1e-17`PF16124.4^RecQ_Zn_bind^RecQ zinc-binding^784-866^E:6e-16`PF09382.9^RQC^RQC domain^873-988^E:8.8e-22	.	ExpAA=22.51^PredHel=1^Topology=o1039-1061i	COG0514^atp-dependent dna helicase	KEGG:ath:AT1G10930`KO:K10901	GO:0005694^cellular_component^chromosome`GO:0005737^cellular_component^cytoplasm`GO:0005634^cellular_component^nucleus`GO:0009506^cellular_component^plasmodesma`GO:0043138^molecular_function^3'-5' DNA helicase activity`GO:0005524^molecular_function^ATP binding`GO:0043140^molecular_function^ATP-dependent 3'-5' DNA helicase activity`GO:0003677^molecular_function^DNA binding`GO:0009378^molecular_fun…	GO:0003676^molecular_function^nucleic acid binding`GO:0005524^molecular_function^ATP binding`GO:0043140^molecular_function^ATP-dependent 3'-5' DNA helicase activity`GO:0006260^biological_process^DNA replication`GO:0006281^biological_process^DNA repair	.	.
TRINITY_DN76732_c4_g1	TRINITY_DN76732_c4_g1_i10	RQL4A_ARATH^RQL4A_ARATH^Q:4200-652,H:21-1187^61.8%ID^E:0^RecName: Full=ATP-dependent DNA helicase Q-like 4A;^Eukaryota; Viridiplantae; Streptophyta; Embryophyta; Tracheophyta; Spermatophyta; Magnoliophyta; eudicotyledons; Gunneridae; Pentapetalae; rosids; malvids; Brassicales; Brassicaceae; Camelineae; Arabidopsis	.	TRINITY_DN76732_c4_g1_i10.p1	616-4266[-]	RQL4A_ARATH^RQL4A_ARATH^Q:23-1205,H:21-1187^61.8%ID^E:0^RecName: Full=ATP-dependent DNA helicase Q-like 4A;^Eukaryota; Viridiplantae; Streptophyta; Embryophyta; Tracheophyta; Spermatophyta; Magnoliophyta; eudicotyledons; Gunneridae; Pentapetalae; rosids; malvids; Brassicales; Brassicaceae; Camelineae; Arabidopsis	PF00270.28^DEAD^DEAD/DEAH box helicase^461-629^E:3.9e-18`PF00271.30^Helicase_C^Helicase conserved C-terminal domain^666-772^E:1.3e-17`PF16124.4^RecQ_Zn_bind^RecQ zinc-binding^784-866^E:7.1e-16`PF09382.9^RQC^RQC domain^873-988^E:1e-21`PF00570.22^HRDC^HRDC domain^1032-1099^E:3.5e-15	.	.	COG0514^atp-dependent dna helicase	KEGG:ath:AT1G10930`KO:K10901	GO:0005694^cellular_component^chromosome`GO:0005737^cellular_component^cytoplasm`GO:0005634^cellular_component^nucleus`GO:0009506^cellular_component^plasmodesma`GO:0043138^molecular_function^3'-5' DNA helicase activity`GO:0005524^molecular_function^ATP binding`GO:0043140^molecular_function^ATP-dependent 3'-5' DNA helicase activity`GO:0003677^molecular_function^DNA binding`GO:0009378^molecular_fun…	GO:0003676^molecular_function^nucleic acid binding`GO:0005524^molecular_function^ATP binding`GO:0043140^molecular_function^ATP-dependent 3'-5' DNA helicase activity`GO:0006260^biological_process^DNA replication`GO:0006281^biological_process^DNA repair`GO:0005622^cellular_component^intracellular	.	.
TRINITY_DN76732_c4_g1	TRINITY_DN76732_c4_g1_i12	RQL4A_ARATH^RQL4A_ARATH^Q:2462-303,H:21-737^61.8%ID^E:2e-235^RecName: Full=ATP-dependent DNA helicase Q-like 4A;^Eukaryota; Viridiplantae; Streptophyta; Embryophyta; Tracheophyta; Spermatophyta; Magnoliophyta; eudicotyledons; Gunneridae; Pentapetalae; rosids; malvids; Brassicales; Brassicaceae; Camelineae; Arabidopsis`RQL4A_ARATH^RQL4A_ARATH^Q:258-157,H:725-759^74.3%ID^E:1.2e-06^RecName: Full=ATP…	.	TRINITY_DN76732_c4_g1_i12.p1	270-2528[-]	RQL4A_ARATH^RQL4A_ARATH^Q:23-742,H:21-737^61.8%ID^E:1.7e-235^RecName: Full=ATP-dependent DNA helicase Q-like 4A;^Eukaryota; Viridiplantae; Streptophyta; Embryophyta; Tracheophyta; Spermatophyta; Magnoliophyta; eudicotyledons; Gunneridae; Pentapetalae; rosids; malvids; Brassicales; Brassicaceae; Camelineae; Arabidopsis	PF00270.28^DEAD^DEAD/DEAH box helicase^461-629^E:1.8e-18`PF00271.30^Helicase_C^Helicase conserved C-terminal domain^666-742^E:1.2e-05	.	.	COG0514^atp-dependent dna helicase	KEGG:ath:AT1G10930`KO:K10901	GO:0005694^cellular_component^chromosome`GO:0005737^cellular_component^cytoplasm`GO:0005634^cellular_component^nucleus`GO:0009506^cellular_component^plasmodesma`GO:0043138^molecular_function^3'-5' DNA helicase activity`GO:0005524^molecular_function^ATP binding`GO:0043140^molecular_function^ATP-dependent 3'-5' DNA helicase activity`GO:0003677^molecular_function^DNA binding`GO:0009378^molecular_fun…	GO:0003676^molecular_function^nucleic acid binding`GO:0005524^molecular_function^ATP binding	.	.
TRINITY_DN76732_c4_g1	TRINITY_DN76732_c4_g1_i13	RQL4A_ARATH^RQL4A_ARATH^Q:4721-1431,H:21-1049^61.3%ID^E:0^RecName: Full=ATP-dependent DNA helicase Q-like 4A;^Eukaryota; Viridiplantae; Streptophyta; Embryophyta; Tracheophyta; Spermatophyta; Magnoliophyta; eudicotyledons; Gunneridae; Pentapetalae; rosids; malvids; Brassicales; Brassicaceae; Camelineae; Arabidopsis`RQL4A_ARATH^RQL4A_ARATH^Q:1089-652,H:1051-1187^39%ID^E:3.2e-16^RecName: Full=ATP-d…	.	TRINITY_DN76732_c4_g1_i13.p1	1578-4787[-]	RQL4A_ARATH^RQL4A_ARATH^Q:23-1027,H:21-1020^64.6%ID^E:0^RecName: Full=ATP-dependent DNA helicase Q-like 4A;^Eukaryota; Viridiplantae; Streptophyta; Embryophyta; Tracheophyta; Spermatophyta; Magnoliophyta; eudicotyledons; Gunneridae; Pentapetalae; rosids; malvids; Brassicales; Brassicaceae; Camelineae; Arabidopsis	PF00270.28^DEAD^DEAD/DEAH box helicase^461-629^E:3.2e-18`PF00271.30^Helicase_C^Helicase conserved C-terminal domain^666-772^E:1.1e-17`PF16124.4^RecQ_Zn_bind^RecQ zinc-binding^784-866^E:6e-16`PF09382.9^RQC^RQC domain^873-988^E:8.8e-22	.	ExpAA=22.51^PredHel=1^Topology=o1039-1061i	COG0514^atp-dependent dna helicase	KEGG:ath:AT1G10930`KO:K10901	GO:0005694^cellular_component^chromosome`GO:0005737^cellular_component^cytoplasm`GO:0005634^cellular_component^nucleus`GO:0009506^cellular_component^plasmodesma`GO:0043138^molecular_function^3'-5' DNA helicase activity`GO:0005524^molecular_function^ATP binding`GO:0043140^molecular_function^ATP-dependent 3'-5' DNA helicase activity`GO:0003677^molecular_function^DNA binding`GO:0009378^molecular_fun…	GO:0003676^molecular_function^nucleic acid binding`GO:0005524^molecular_function^ATP binding`GO:0043140^molecular_function^ATP-dependent 3'-5' DNA helicase activity`GO:0006260^biological_process^DNA replication`GO:0006281^biological_process^DNA repair	.	.
TRINITY_DN76732_c4_g1	TRINITY_DN76732_c4_g1_i2	RQL4A_ARATH^RQL4A_ARATH^Q:1701-652,H:877-1187^49.7%ID^E:6.6e-76^RecName: Full=ATP-dependent DNA helicase Q-like 4A;^Eukaryota; Viridiplantae; Streptophyta; Embryophyta; Tracheophyta; Spermatophyta; Magnoliophyta; eudicotyledons; Gunneridae; Pentapetalae; rosids; malvids; Brassicales; Brassicaceae; Camelineae; Arabidopsis	.	TRINITY_DN76732_c4_g1_i2.p1	616-1152[-]	RQL4A_ARATH^RQL4A_ARATH^Q:2-167,H:1031-1187^44%ID^E:3.1e-26^RecName: Full=ATP-dependent DNA helicase Q-like 4A;^Eukaryota; Viridiplantae; Streptophyta; Embryophyta; Tracheophyta; Spermatophyta; Magnoliophyta; eudicotyledons; Gunneridae; Pentapetalae; rosids; malvids; Brassicales; Brassicaceae; Camelineae; Arabidopsis	PF00570.22^HRDC^HRDC domain^12-61^E:6.8e-15	.	.	COG0514^atp-dependent dna helicase	KEGG:ath:AT1G10930`KO:K10901	GO:0005694^cellular_component^chromosome`GO:0005737^cellular_component^cytoplasm`GO:0005634^cellular_component^nucleus`GO:0009506^cellular_component^plasmodesma`GO:0043138^molecular_function^3'-5' DNA helicase activity`GO:0005524^molecular_function^ATP binding`GO:0043140^molecular_function^ATP-dependent 3'-5' DNA helicase activity`GO:0003677^molecular_function^DNA binding`GO:0009378^molecular_fun…	GO:0003676^molecular_function^nucleic acid binding`GO:0005622^cellular_component^intracellular	.	.
TRINITY_DN76732_c4_g1	TRINITY_DN76732_c4_g1_i11	RQL4A_ARATH^RQL4A_ARATH^Q:4674-652,H:21-1187^54.6%ID^E:0^RecName: Full=ATP-dependent DNA helicase Q-like 4A;^Eukaryota; Viridiplantae; Streptophyta; Embryophyta; Tracheophyta; Spermatophyta; Magnoliophyta; eudicotyledons; Gunneridae; Pentapetalae; rosids; malvids; Brassicales; Brassicaceae; Camelineae; Arabidopsis	.	TRINITY_DN76732_c4_g1_i11.p1	616-2673[-]	RQL4A_ARATH^RQL4A_ARATH^Q:1-674,H:527-1187^69.4%ID^E:5e-266^RecName: Full=ATP-dependent DNA helicase Q-like 4A;^Eukaryota; Viridiplantae; Streptophyta; Embryophyta; Tracheophyta; Spermatophyta; Magnoliophyta; eudicotyledons; Gunneridae; Pentapetalae; rosids; malvids; Brassicales; Brassicaceae; Camelineae; Arabidopsis	PF00270.28^DEAD^DEAD/DEAH box helicase^15-98^E:2.6e-05`PF00271.30^Helicase_C^Helicase conserved C-terminal domain^135-241^E:5.9e-18`PF16124.4^RecQ_Zn_bind^RecQ zinc-binding^253-335^E:3.3e-16`PF09382.9^RQC^RQC domain^342-457^E:4.6e-22`PF00570.22^HRDC^HRDC domain^501-568^E:1.7e-15	.	.	COG0514^atp-dependent dna helicase	KEGG:ath:AT1G10930`KO:K10901	GO:0005694^cellular_component^chromosome`GO:0005737^cellular_component^cytoplasm`GO:0005634^cellular_component^nucleus`GO:0009506^cellular_component^plasmodesma`GO:0043138^molecular_function^3'-5' DNA helicase activity`GO:0005524^molecular_function^ATP binding`GO:0043140^molecular_function^ATP-dependent 3'-5' DNA helicase activity`GO:0003677^molecular_function^DNA binding`GO:0009378^molecular_fun…	GO:0003676^molecular_function^nucleic acid binding`GO:0005524^molecular_function^ATP binding`GO:0043140^molecular_function^ATP-dependent 3'-5' DNA helicase activity`GO:0006260^biological_process^DNA replication`GO:0006281^biological_process^DNA repair`GO:0005622^cellular_component^intracellular	.	.
TRINITY_DN76732_c4_g1	TRINITY_DN76732_c4_g1_i16	RQL4A_ARATH^RQL4A_ARATH^Q:2124-502,H:21-558^52.9%ID^E:2.3e-134^RecName: Full=ATP-dependent DNA helicase Q-like 4A;^Eukaryota; Viridiplantae; Streptophyta; Embryophyta; Tracheophyta; Spermatophyta; Magnoliophyta; eudicotyledons; Gunneridae; Pentapetalae; rosids; malvids; Brassicales; Brassicaceae; Camelineae; Arabidopsis	.	TRINITY_DN76732_c4_g1_i16.p1	499-2190[-]	RQL4A_ARATH^RQL4A_ARATH^Q:23-563,H:21-558^52.9%ID^E:2.2e-134^RecName: Full=ATP-dependent DNA helicase Q-like 4A;^Eukaryota; Viridiplantae; Streptophyta; Embryophyta; Tracheophyta; Spermatophyta; Magnoliophyta; eudicotyledons; Gunneridae; Pentapetalae; rosids; malvids; Brassicales; Brassicaceae; Camelineae; Arabidopsis	PF00270.28^DEAD^DEAD/DEAH box helicase^461-561^E:1.5e-09	.	.	COG0514^atp-dependent dna helicase	KEGG:ath:AT1G10930`KO:K10901	GO:0005694^cellular_component^chromosome`GO:0005737^cellular_component^cytoplasm`GO:0005634^cellular_component^nucleus`GO:0009506^cellular_component^plasmodesma`GO:0043138^molecular_function^3'-5' DNA helicase activity`GO:0005524^molecular_function^ATP binding`GO:0043140^molecular_function^ATP-dependent 3'-5' DNA helicase activity`GO:0003677^molecular_function^DNA binding`GO:0009378^molecular_fun…	GO:0003676^molecular_function^nucleic acid binding`GO:0005524^molecular_function^ATP binding	.	.
TRINITY_DN76732_c4_g1	TRINITY_DN76732_c4_g1_i5	RQL4A_ARATH^RQL4A_ARATH^Q:4609-1502,H:21-1049^65%ID^E:0^RecName: Full=ATP-dependent DNA helicase Q-like 4A;^Eukaryota; Viridiplantae; Streptophyta; Embryophyta; Tracheophyta; Spermatophyta; Magnoliophyta; eudicotyledons; Gunneridae; Pentapetalae; rosids; malvids; Brassicales; Brassicaceae; Camelineae; Arabidopsis	.	TRINITY_DN76732_c4_g1_i5.p1	1451-4675[-]	RQL4A_ARATH^RQL4A_ARATH^Q:23-1058,H:21-1049^65%ID^E:0^RecName: Full=ATP-dependent DNA helicase Q-like 4A;^Eukaryota; Viridiplantae; Streptophyta; Embryophyta; Tracheophyta; Spermatophyta; Magnoliophyta; eudicotyledons; Gunneridae; Pentapetalae; rosids; malvids; Brassicales; Brassicaceae; Camelineae; Arabidopsis	PF00270.28^DEAD^DEAD/DEAH box helicase^461-629^E:3.2e-18`PF00271.30^Helicase_C^Helicase conserved C-terminal domain^666-772^E:1.1e-17`PF16124.4^RecQ_Zn_bind^RecQ zinc-binding^784-866^E:6.1e-16`PF09382.9^RQC^RQC domain^873-988^E:8.8e-22	.	.	COG0514^atp-dependent dna helicase	KEGG:ath:AT1G10930`KO:K10901	GO:0005694^cellular_component^chromosome`GO:0005737^cellular_component^cytoplasm`GO:0005634^cellular_component^nucleus`GO:0009506^cellular_component^plasmodesma`GO:0043138^molecular_function^3'-5' DNA helicase activity`GO:0005524^molecular_function^ATP binding`GO:0043140^molecular_function^ATP-dependent 3'-5' DNA helicase activity`GO:0003677^molecular_function^DNA binding`GO:0009378^molecular_fun…	GO:0003676^molecular_function^nucleic acid binding`GO:0005524^molecular_function^ATP binding`GO:0043140^molecular_function^ATP-dependent 3'-5' DNA helicase activity`GO:0006260^biological_process^DNA replication`GO:0006281^biological_process^DNA repair	.	.
TRINITY_DN76732_c4_g1	TRINITY_DN76732_c4_g1_i6	RQL4A_ARATH^RQL4A_ARATH^Q:2016-394,H:21-558^52.9%ID^E:2.1e-134^RecName: Full=ATP-dependent DNA helicase Q-like 4A;^Eukaryota; Viridiplantae; Streptophyta; Embryophyta; Tracheophyta; Spermatophyta; Magnoliophyta; eudicotyledons; Gunneridae; Pentapetalae; rosids; malvids; Brassicales; Brassicaceae; Camelineae; Arabidopsis	.	TRINITY_DN76732_c4_g1_i6.p1	391-2082[-]	RQL4A_ARATH^RQL4A_ARATH^Q:23-563,H:21-558^52.9%ID^E:2.2e-134^RecName: Full=ATP-dependent DNA helicase Q-like 4A;^Eukaryota; Viridiplantae; Streptophyta; Embryophyta; Tracheophyta; Spermatophyta; Magnoliophyta; eudicotyledons; Gunneridae; Pentapetalae; rosids; malvids; Brassicales; Brassicaceae; Camelineae; Arabidopsis	PF00270.28^DEAD^DEAD/DEAH box helicase^461-561^E:1.5e-09	.	.	COG0514^atp-dependent dna helicase	KEGG:ath:AT1G10930`KO:K10901	GO:0005694^cellular_component^chromosome`GO:0005737^cellular_component^cytoplasm`GO:0005634^cellular_component^nucleus`GO:0009506^cellular_component^plasmodesma`GO:0043138^molecular_function^3'-5' DNA helicase activity`GO:0005524^molecular_function^ATP binding`GO:0043140^molecular_function^ATP-dependent 3'-5' DNA helicase activity`GO:0003677^molecular_function^DNA binding`GO:0009378^molecular_fun…	GO:0003676^molecular_function^nucleic acid binding`GO:0005524^molecular_function^ATP binding	.	.
TRINITY_DN76732_c4_g1	TRINITY_DN76732_c4_g1_i7	RQL4A_ARATH^RQL4A_ARATH^Q:206-84,H:558-598^82.9%ID^E:2.3e-13^RecName: Full=ATP-dependent DNA helicase Q-like 4A;^Eukaryota; Viridiplantae; Streptophyta; Embryophyta; Tracheophyta; Spermatophyta; Magnoliophyta; eudicotyledons; Gunneridae; Pentapetalae; rosids; malvids; Brassicales; Brassicaceae; Camelineae; Arabidopsis	.	.	.	.	.	.	.	COG0514^atp-dependent dna helicase	KEGG:ath:AT1G10930`KO:K10901	GO:0005694^cellular_component^chromosome`GO:0005737^cellular_component^cytoplasm`GO:0005634^cellular_component^nucleus`GO:0009506^cellular_component^plasmodesma`GO:0043138^molecular_function^3'-5' DNA helicase activity`GO:0005524^molecular_function^ATP binding`GO:0043140^molecular_function^ATP-dependent 3'-5' DNA helicase activity`GO:0003677^molecular_function^DNA binding`GO:0009378^molecular_fun…	.	.	.
TRINITY_DN76732_c4_g1	TRINITY_DN76732_c4_g1_i8	RQL4A_ARATH^RQL4A_ARATH^Q:4200-652,H:21-1187^61.8%ID^E:0^RecName: Full=ATP-dependent DNA helicase Q-like 4A;^Eukaryota; Viridiplantae; Streptophyta; Embryophyta; Tracheophyta; Spermatophyta; Magnoliophyta; eudicotyledons; Gunneridae; Pentapetalae; rosids; malvids; Brassicales; Brassicaceae; Camelineae; Arabidopsis	.	TRINITY_DN76732_c4_g1_i8.p1	616-4266[-]	RQL4A_ARATH^RQL4A_ARATH^Q:23-1205,H:21-1187^61.8%ID^E:0^RecName: Full=ATP-dependent DNA helicase Q-like 4A;^Eukaryota; Viridiplantae; Streptophyta; Embryophyta; Tracheophyta; Spermatophyta; Magnoliophyta; eudicotyledons; Gunneridae; Pentapetalae; rosids; malvids; Brassicales; Brassicaceae; Camelineae; Arabidopsis	PF00270.28^DEAD^DEAD/DEAH box helicase^461-629^E:3.9e-18`PF00271.30^Helicase_C^Helicase conserved C-terminal domain^666-772^E:1.3e-17`PF16124.4^RecQ_Zn_bind^RecQ zinc-binding^784-866^E:7.1e-16`PF09382.9^RQC^RQC domain^873-988^E:1e-21`PF00570.22^HRDC^HRDC domain^1032-1099^E:3.5e-15	.	.	COG0514^atp-dependent dna helicase	KEGG:ath:AT1G10930`KO:K10901	GO:0005694^cellular_component^chromosome`GO:0005737^cellular_component^cytoplasm`GO:0005634^cellular_component^nucleus`GO:0009506^cellular_component^plasmodesma`GO:0043138^molecular_function^3'-5' DNA helicase activity`GO:0005524^molecular_function^ATP binding`GO:0043140^molecular_function^ATP-dependent 3'-5' DNA helicase activity`GO:0003677^molecular_function^DNA binding`GO:0009378^molecular_fun…	GO:0003676^molecular_function^nucleic acid binding`GO:0005524^molecular_function^ATP binding`GO:0043140^molecular_function^ATP-dependent 3'-5' DNA helicase activity`GO:0006260^biological_process^DNA replication`GO:0006281^biological_process^DNA repair`GO:0005622^cellular_component^intracellular	.	.
TRINITY_DN76732_c4_g1	TRINITY_DN76732_c4_g1_i4	.	.	.	.	.	.	.	.	.	.	.	.	.	.
TRINITY_DN76732_c4_g1	TRINITY_DN76732_c4_g1_i3	RQL4A_ARATH^RQL4A_ARATH^Q:4538-1431,H:21-1049^65%ID^E:0^RecName: Full=ATP-dependent DNA helicase Q-like 4A;^Eukaryota; Viridiplantae; Streptophyta; Embryophyta; Tracheophyta; Spermatophyta; Magnoliophyta; eudicotyledons; Gunneridae; Pentapetalae; rosids; malvids; Brassicales; Brassicaceae; Camelineae; Arabidopsis`RQL4A_ARATH^RQL4A_ARATH^Q:1089-652,H:1051-1187^39%ID^E:3.1e-16^RecName: Full=ATP-dep…	.	TRINITY_DN76732_c4_g1_i3.p1	1380-4604[-]	RQL4A_ARATH^RQL4A_ARATH^Q:23-1058,H:21-1049^65%ID^E:0^RecName: Full=ATP-dependent DNA helicase Q-like 4A;^Eukaryota; Viridiplantae; Streptophyta; Embryophyta; Tracheophyta; Spermatophyta; Magnoliophyta; eudicotyledons; Gunneridae; Pentapetalae; rosids; malvids; Brassicales; Brassicaceae; Camelineae; Arabidopsis	PF00270.28^DEAD^DEAD/DEAH box helicase^461-629^E:3.2e-18`PF00271.30^Helicase_C^Helicase conserved C-terminal domain^666-772^E:1.1e-17`PF16124.4^RecQ_Zn_bind^RecQ zinc-binding^784-866^E:6.1e-16`PF09382.9^RQC^RQC domain^873-988^E:8.8e-22	.	.	COG0514^atp-dependent dna helicase	KEGG:ath:AT1G10930`KO:K10901	GO:0005694^cellular_component^chromosome`GO:0005737^cellular_component^cytoplasm`GO:0005634^cellular_component^nucleus`GO:0009506^cellular_component^plasmodesma`GO:0043138^molecular_function^3'-5' DNA helicase activity`GO:0005524^molecular_function^ATP binding`GO:0043140^molecular_function^ATP-dependent 3'-5' DNA helicase activity`GO:0003677^molecular_function^DNA binding`GO:0009378^molecular_fun…	GO:0003676^molecular_function^nucleic acid binding`GO:0005524^molecular_function^ATP binding`GO:0043140^molecular_function^ATP-dependent 3'-5' DNA helicase activity`GO:0006260^biological_process^DNA replication`GO:0006281^biological_process^DNA repair	.	.
TRINITY_DN76759_c0_g1	TRINITY_DN76759_c0_g1_i2	POLR1_ARATH^POLR1_ARATH^Q:653-1366,H:1032-1269^50%ID^E:5.4e-65^RecName: Full=Retrovirus-related Pol polyprotein from transposon RE1;^Eukaryota; Viridiplantae; Streptophyta; Embryophyta; Tracheophyta; Spermatophyta; Magnoliophyta; eudicotyledons; Gunneridae; Pentapetalae; rosids; malvids; Brassicales; Brassicaceae; Camelineae; Arabidopsis`POLR1_ARATH^POLR1_ARATH^Q:312-1889,H:925-1446^33.2%ID^E:1.1…	.	TRINITY_DN76759_c0_g1_i2.p1	1371-1889[+]	POLR2_ARATH^POLR2_ARATH^Q:5-173,H:1260-1429^55.3%ID^E:2e-49^RecName: Full=Retrovirus-related Pol polyprotein from transposon RE2;^Eukaryota; Viridiplantae; Streptophyta; Embryophyta; Tracheophyta; Spermatophyta; Magnoliophyta; eudicotyledons; Gunneridae; Pentapetalae; rosids; malvids; Brassicales; Brassicaceae; Camelineae; Arabidopsis	.	.	.	.	.	GO:0004190^molecular_function^aspartic-type endopeptidase activity`GO:0004519^molecular_function^endonuclease activity`GO:0046872^molecular_function^metal ion binding`GO:0003676^molecular_function^nucleic acid binding`GO:0003964^molecular_function^RNA-directed DNA polymerase activity`GO:0015074^biological_process^DNA integration`GO:0006310^biological_process^DNA recombination	.	.	.
TRINITY_DN76759_c0_g1	TRINITY_DN76759_c0_g1_i3	POLR1_ARATH^POLR1_ARATH^Q:653-1888,H:1032-1446^51.1%ID^E:2.6e-120^RecName: Full=Retrovirus-related Pol polyprotein from transposon RE1;^Eukaryota; Viridiplantae; Streptophyta; Embryophyta; Tracheophyta; Spermatophyta; Magnoliophyta; eudicotyledons; Gunneridae; Pentapetalae; rosids; malvids; Brassicales; Brassicaceae; Camelineae; Arabidopsis`POLR1_ARATH^POLR1_ARATH^Q:312-644,H:925-1028^40.2%ID^E:1…	.	TRINITY_DN76759_c0_g1_i3.p1	1202-1888[+]	POLR2_ARATH^POLR2_ARATH^Q:1-229,H:1198-1429^50.9%ID^E:1.1e-60^RecName: Full=Retrovirus-related Pol polyprotein from transposon RE2;^Eukaryota; Viridiplantae; Streptophyta; Embryophyta; Tracheophyta; Spermatophyta; Magnoliophyta; eudicotyledons; Gunneridae; Pentapetalae; rosids; malvids; Brassicales; Brassicaceae; Camelineae; Arabidopsis	.	.	.	.	.	GO:0004190^molecular_function^aspartic-type endopeptidase activity`GO:0004519^molecular_function^endonuclease activity`GO:0046872^molecular_function^metal ion binding`GO:0003676^molecular_function^nucleic acid binding`GO:0003964^molecular_function^RNA-directed DNA polymerase activity`GO:0015074^biological_process^DNA integration`GO:0006310^biological_process^DNA recombination	.	.	.
TRINITY_DN76755_c0_g1	TRINITY_DN76755_c0_g1_i4	FZL_ARATH^FZL_ARATH^Q:2271-3866,H:356-887^68%ID^E:3e-204^RecName: Full=Probable transmembrane GTPase FZO-like, chloroplastic {ECO:0000305};^Eukaryota; Viridiplantae; Streptophyta; Embryophyta; Tracheophyta; Spermatophyta; Magnoliophyta; eudicotyledons; Gunneridae; Pentapetalae; rosids; malvids; Brassicales; Brassicaceae; Camelineae; Arabidopsis`FZL_ARATH^FZL_ARATH^Q:269-1240,H:22-333^47.1%ID^E:8.…	.	TRINITY_DN76755_c0_g1_i4.p1	2469-3926[+]	FZL_ARATH^FZL_ARATH^Q:3-484,H:424-905^64.5%ID^E:5.3e-169^RecName: Full=Probable transmembrane GTPase FZO-like, chloroplastic {ECO:0000305};^Eukaryota; Viridiplantae; Streptophyta; Embryophyta; Tracheophyta; Spermatophyta; Magnoliophyta; eudicotyledons; Gunneridae; Pentapetalae; rosids; malvids; Brassicales; Brassicaceae; Camelineae; Arabidopsis	PF00350.22^Dynamin_N^Dynamin family^2-64^E:1e-08	.	.	COG0699^Dynamin family	KEGG:ath:AT1G03160	GO:0009507^cellular_component^chloroplast`GO:0009706^cellular_component^chloroplast inner membrane`GO:0031969^cellular_component^chloroplast membrane`GO:0009707^cellular_component^chloroplast outer membrane`GO:0009535^cellular_component^chloroplast thylakoid membrane`GO:0016021^cellular_component^integral component of membrane`GO:0005525^molecular_function^GTP binding`GO:0016787^molecular_functio…	.	.	.
TRINITY_DN76755_c0_g1	TRINITY_DN76755_c0_g1_i5	FZL_ARATH^FZL_ARATH^Q:269-1426,H:22-391^47.7%ID^E:1.4e-69^RecName: Full=Probable transmembrane GTPase FZO-like, chloroplastic {ECO:0000305};^Eukaryota; Viridiplantae; Streptophyta; Embryophyta; Tracheophyta; Spermatophyta; Magnoliophyta; eudicotyledons; Gunneridae; Pentapetalae; rosids; malvids; Brassicales; Brassicaceae; Camelineae; Arabidopsis`FZL_ARATH^FZL_ARATH^Q:2155-2574,H:356-495^82.1%ID^E…	.	TRINITY_DN76755_c0_g1_i5.p1	212-1321[+]	FZL_ARATH^FZL_ARATH^Q:20-364,H:22-354^50%ID^E:1.8e-68^RecName: Full=Probable transmembrane GTPase FZO-like, chloroplastic {ECO:0000305};^Eukaryota; Viridiplantae; Streptophyta; Embryophyta; Tracheophyta; Spermatophyta; Magnoliophyta; eudicotyledons; Gunneridae; Pentapetalae; rosids; malvids; Brassicales; Brassicaceae; Camelineae; Arabidopsis	.	.	.	COG0699^Dynamin family	KEGG:ath:AT1G03160	GO:0009507^cellular_component^chloroplast`GO:0009706^cellular_component^chloroplast inner membrane`GO:0031969^cellular_component^chloroplast membrane`GO:0009707^cellular_component^chloroplast outer membrane`GO:0009535^cellular_component^chloroplast thylakoid membrane`GO:0016021^cellular_component^integral component of membrane`GO:0005525^molecular_function^GTP binding`GO:0016787^molecular_functio…	.	.	.
TRINITY_DN76755_c0_g1	TRINITY_DN76755_c0_g1_i7	FZL_ARATH^FZL_ARATH^Q:112-1275,H:49-421^56.4%ID^E:6.2e-105^RecName: Full=Probable transmembrane GTPase FZO-like, chloroplastic {ECO:0000305};^Eukaryota; Viridiplantae; Streptophyta; Embryophyta; Tracheophyta; Spermatophyta; Magnoliophyta; eudicotyledons; Gunneridae; Pentapetalae; rosids; malvids; Brassicales; Brassicaceae; Camelineae; Arabidopsis	.	TRINITY_DN76755_c0_g1_i7.p1	1-1275[+]	FZL_ARATH^FZL_ARATH^Q:38-425,H:49-421^56.4%ID^E:6.2e-105^RecName: Full=Probable transmembrane GTPase FZO-like, chloroplastic {ECO:0000305};^Eukaryota; Viridiplantae; Streptophyta; Embryophyta; Tracheophyta; Spermatophyta; Magnoliophyta; eudicotyledons; Gunneridae; Pentapetalae; rosids; malvids; Brassicales; Brassicaceae; Camelineae; Arabidopsis	PF00350.22^Dynamin_N^Dynamin family^357-400^E:6.6e-10`PF01926.22^MMR_HSR1^50S ribosome-binding GTPase^357-396^E:2.7e-05	.	.	COG0699^Dynamin family	KEGG:ath:AT1G03160	GO:0009507^cellular_component^chloroplast`GO:0009706^cellular_component^chloroplast inner membrane`GO:0031969^cellular_component^chloroplast membrane`GO:0009707^cellular_component^chloroplast outer membrane`GO:0009535^cellular_component^chloroplast thylakoid membrane`GO:0016021^cellular_component^integral component of membrane`GO:0005525^molecular_function^GTP binding`GO:0016787^molecular_functio…	GO:0005525^molecular_function^GTP binding	.	.
TRINITY_DN76755_c0_g1	TRINITY_DN76755_c0_g1_i1	FZL_ARATH^FZL_ARATH^Q:269-1414,H:22-379^47.6%ID^E:6e-70^RecName: Full=Probable transmembrane GTPase FZO-like, chloroplastic {ECO:0000305};^Eukaryota; Viridiplantae; Streptophyta; Embryophyta; Tracheophyta; Spermatophyta; Magnoliophyta; eudicotyledons; Gunneridae; Pentapetalae; rosids; malvids; Brassicales; Brassicaceae; Camelineae; Arabidopsis`FZL_ARATH^FZL_ARATH^Q:1354-1554,H:355-421^80.6%ID^E:1…	.	TRINITY_DN76755_c0_g1_i1.p1	212-1321[+]	FZL_ARATH^FZL_ARATH^Q:20-364,H:22-354^50%ID^E:1.8e-68^RecName: Full=Probable transmembrane GTPase FZO-like, chloroplastic {ECO:0000305};^Eukaryota; Viridiplantae; Streptophyta; Embryophyta; Tracheophyta; Spermatophyta; Magnoliophyta; eudicotyledons; Gunneridae; Pentapetalae; rosids; malvids; Brassicales; Brassicaceae; Camelineae; Arabidopsis	.	.	.	COG0699^Dynamin family	KEGG:ath:AT1G03160	GO:0009507^cellular_component^chloroplast`GO:0009706^cellular_component^chloroplast inner membrane`GO:0031969^cellular_component^chloroplast membrane`GO:0009707^cellular_component^chloroplast outer membrane`GO:0009535^cellular_component^chloroplast thylakoid membrane`GO:0016021^cellular_component^integral component of membrane`GO:0005525^molecular_function^GTP binding`GO:0016787^molecular_functio…	.	.	.
TRINITY_DN76755_c0_g1	TRINITY_DN76755_c0_g1_i2	FZL_ARATH^FZL_ARATH^Q:269-685,H:22-164^50.7%ID^E:4.5e-23^RecName: Full=Probable transmembrane GTPase FZO-like, chloroplastic {ECO:0000305};^Eukaryota; Viridiplantae; Streptophyta; Embryophyta; Tracheophyta; Spermatophyta; Magnoliophyta; eudicotyledons; Gunneridae; Pentapetalae; rosids; malvids; Brassicales; Brassicaceae; Camelineae; Arabidopsis	.	TRINITY_DN76755_c0_g1_i2.p2	212-751[+]	FZL_ARATH^FZL_ARATH^Q:20-158,H:22-164^50.7%ID^E:3.3e-23^RecName: Full=Probable transmembrane GTPase FZO-like, chloroplastic {ECO:0000305};^Eukaryota; Viridiplantae; Streptophyta; Embryophyta; Tracheophyta; Spermatophyta; Magnoliophyta; eudicotyledons; Gunneridae; Pentapetalae; rosids; malvids; Brassicales; Brassicaceae; Camelineae; Arabidopsis	.	.	.	COG0699^Dynamin family	KEGG:ath:AT1G03160	GO:0009507^cellular_component^chloroplast`GO:0009706^cellular_component^chloroplast inner membrane`GO:0031969^cellular_component^chloroplast membrane`GO:0009707^cellular_component^chloroplast outer membrane`GO:0009535^cellular_component^chloroplast thylakoid membrane`GO:0016021^cellular_component^integral component of membrane`GO:0005525^molecular_function^GTP binding`GO:0016787^molecular_functio…	.	.	.
TRINITY_DN76755_c0_g1	TRINITY_DN76755_c0_g1_i3	FZL_ARATH^FZL_ARATH^Q:2271-3527,H:356-774^67.5%ID^E:1e-160^RecName: Full=Probable transmembrane GTPase FZO-like, chloroplastic {ECO:0000305};^Eukaryota; Viridiplantae; Streptophyta; Embryophyta; Tracheophyta; Spermatophyta; Magnoliophyta; eudicotyledons; Gunneridae; Pentapetalae; rosids; malvids; Brassicales; Brassicaceae; Camelineae; Arabidopsis`FZL_ARATH^FZL_ARATH^Q:269-1240,H:22-333^47.1%ID^E:…	.	TRINITY_DN76755_c0_g1_i3.p2	212-1249[+]	FZL_ARATH^FZL_ARATH^Q:20-343,H:22-333^47.1%ID^E:2.1e-58^RecName: Full=Probable transmembrane GTPase FZO-like, chloroplastic {ECO:0000305};^Eukaryota; Viridiplantae; Streptophyta; Embryophyta; Tracheophyta; Spermatophyta; Magnoliophyta; eudicotyledons; Gunneridae; Pentapetalae; rosids; malvids; Brassicales; Brassicaceae; Camelineae; Arabidopsis	.	.	.	COG0699^Dynamin family	KEGG:ath:AT1G03160	GO:0009507^cellular_component^chloroplast`GO:0009706^cellular_component^chloroplast inner membrane`GO:0031969^cellular_component^chloroplast membrane`GO:0009707^cellular_component^chloroplast outer membrane`GO:0009535^cellular_component^chloroplast thylakoid membrane`GO:0016021^cellular_component^integral component of membrane`GO:0005525^molecular_function^GTP binding`GO:0016787^molecular_functio…	.	.	.
TRINITY_DN76755_c0_g1	TRINITY_DN76755_c0_g1_i8	FZL_ARATH^FZL_ARATH^Q:269-1426,H:22-391^47.7%ID^E:1.4e-69^RecName: Full=Probable transmembrane GTPase FZO-like, chloroplastic {ECO:0000305};^Eukaryota; Viridiplantae; Streptophyta; Embryophyta; Tracheophyta; Spermatophyta; Magnoliophyta; eudicotyledons; Gunneridae; Pentapetalae; rosids; malvids; Brassicales; Brassicaceae; Camelineae; Arabidopsis`FZL_ARATH^FZL_ARATH^Q:2155-2358,H:356-423^79.4%ID^E…	.	TRINITY_DN76755_c0_g1_i8.p1	212-1321[+]	FZL_ARATH^FZL_ARATH^Q:20-364,H:22-354^50%ID^E:1.8e-68^RecName: Full=Probable transmembrane GTPase FZO-like, chloroplastic {ECO:0000305};^Eukaryota; Viridiplantae; Streptophyta; Embryophyta; Tracheophyta; Spermatophyta; Magnoliophyta; eudicotyledons; Gunneridae; Pentapetalae; rosids; malvids; Brassicales; Brassicaceae; Camelineae; Arabidopsis	.	.	.	COG0699^Dynamin family	KEGG:ath:AT1G03160	GO:0009507^cellular_component^chloroplast`GO:0009706^cellular_component^chloroplast inner membrane`GO:0031969^cellular_component^chloroplast membrane`GO:0009707^cellular_component^chloroplast outer membrane`GO:0009535^cellular_component^chloroplast thylakoid membrane`GO:0016021^cellular_component^integral component of membrane`GO:0005525^molecular_function^GTP binding`GO:0016787^molecular_functio…	.	.	.
TRINITY_DN76755_c0_g1	TRINITY_DN76755_c0_g1_i9	FZL_ARATH^FZL_ARATH^Q:112-1185,H:49-379^48.9%ID^E:2.7e-71^RecName: Full=Probable transmembrane GTPase FZO-like, chloroplastic {ECO:0000305};^Eukaryota; Viridiplantae; Streptophyta; Embryophyta; Tracheophyta; Spermatophyta; Magnoliophyta; eudicotyledons; Gunneridae; Pentapetalae; rosids; malvids; Brassicales; Brassicaceae; Camelineae; Arabidopsis`FZL_ARATH^FZL_ARATH^Q:1125-1325,H:355-421^80.6%ID^E…	.	TRINITY_DN76755_c0_g1_i9.p1	1-1092[+]	FZL_ARATH^FZL_ARATH^Q:38-358,H:49-354^51.7%ID^E:1.2e-69^RecName: Full=Probable transmembrane GTPase FZO-like, chloroplastic {ECO:0000305};^Eukaryota; Viridiplantae; Streptophyta; Embryophyta; Tracheophyta; Spermatophyta; Magnoliophyta; eudicotyledons; Gunneridae; Pentapetalae; rosids; malvids; Brassicales; Brassicaceae; Camelineae; Arabidopsis	.	.	.	COG0699^Dynamin family	KEGG:ath:AT1G03160	GO:0009507^cellular_component^chloroplast`GO:0009706^cellular_component^chloroplast inner membrane`GO:0031969^cellular_component^chloroplast membrane`GO:0009707^cellular_component^chloroplast outer membrane`GO:0009535^cellular_component^chloroplast thylakoid membrane`GO:0016021^cellular_component^integral component of membrane`GO:0005525^molecular_function^GTP binding`GO:0016787^molecular_functio…	.	.	.
TRINITY_DN76755_c0_g1	TRINITY_DN76755_c0_g1_i15	FZL_ARATH^FZL_ARATH^Q:2271-3296,H:356-697^71.3%ID^E:1.4e-136^RecName: Full=Probable transmembrane GTPase FZO-like, chloroplastic {ECO:0000305};^Eukaryota; Viridiplantae; Streptophyta; Embryophyta; Tracheophyta; Spermatophyta; Magnoliophyta; eudicotyledons; Gunneridae; Pentapetalae; rosids; malvids; Brassicales; Brassicaceae; Camelineae; Arabidopsis`FZL_ARATH^FZL_ARATH^Q:269-1240,H:22-333^47.1%ID^…	.	TRINITY_DN76755_c0_g1_i15.p1	212-1249[+]	FZL_ARATH^FZL_ARATH^Q:20-343,H:22-333^47.1%ID^E:2.1e-58^RecName: Full=Probable transmembrane GTPase FZO-like, chloroplastic {ECO:0000305};^Eukaryota; Viridiplantae; Streptophyta; Embryophyta; Tracheophyta; Spermatophyta; Magnoliophyta; eudicotyledons; Gunneridae; Pentapetalae; rosids; malvids; Brassicales; Brassicaceae; Camelineae; Arabidopsis	.	.	.	COG0699^Dynamin family	KEGG:ath:AT1G03160	GO:0009507^cellular_component^chloroplast`GO:0009706^cellular_component^chloroplast inner membrane`GO:0031969^cellular_component^chloroplast membrane`GO:0009707^cellular_component^chloroplast outer membrane`GO:0009535^cellular_component^chloroplast thylakoid membrane`GO:0016021^cellular_component^integral component of membrane`GO:0005525^molecular_function^GTP binding`GO:0016787^molecular_functio…	.	.	.
TRINITY_DN76755_c0_g1	TRINITY_DN76755_c0_g1_i12	FZL_ARATH^FZL_ARATH^Q:2155-3411,H:356-774^67.5%ID^E:9.9e-161^RecName: Full=Probable transmembrane GTPase FZO-like, chloroplastic {ECO:0000305};^Eukaryota; Viridiplantae; Streptophyta; Embryophyta; Tracheophyta; Spermatophyta; Magnoliophyta; eudicotyledons; Gunneridae; Pentapetalae; rosids; malvids; Brassicales; Brassicaceae; Camelineae; Arabidopsis`FZL_ARATH^FZL_ARATH^Q:269-1426,H:22-391^47.7%ID^…	.	TRINITY_DN76755_c0_g1_i12.p2	212-1321[+]	FZL_ARATH^FZL_ARATH^Q:20-364,H:22-354^50%ID^E:1.8e-68^RecName: Full=Probable transmembrane GTPase FZO-like, chloroplastic {ECO:0000305};^Eukaryota; Viridiplantae; Streptophyta; Embryophyta; Tracheophyta; Spermatophyta; Magnoliophyta; eudicotyledons; Gunneridae; Pentapetalae; rosids; malvids; Brassicales; Brassicaceae; Camelineae; Arabidopsis	.	.	.	COG0699^Dynamin family	KEGG:ath:AT1G03160	GO:0009507^cellular_component^chloroplast`GO:0009706^cellular_component^chloroplast inner membrane`GO:0031969^cellular_component^chloroplast membrane`GO:0009707^cellular_component^chloroplast outer membrane`GO:0009535^cellular_component^chloroplast thylakoid membrane`GO:0016021^cellular_component^integral component of membrane`GO:0005525^molecular_function^GTP binding`GO:0016787^molecular_functio…	.	.	.
TRINITY_DN76755_c0_g1	TRINITY_DN76755_c0_g1_i13	FZL_ARATH^FZL_ARATH^Q:63-515,H:491-641^65.6%ID^E:5.2e-47^RecName: Full=Probable transmembrane GTPase FZO-like, chloroplastic {ECO:0000305};^Eukaryota; Viridiplantae; Streptophyta; Embryophyta; Tracheophyta; Spermatophyta; Magnoliophyta; eudicotyledons; Gunneridae; Pentapetalae; rosids; malvids; Brassicales; Brassicaceae; Camelineae; Arabidopsis	.	TRINITY_DN76755_c0_g1_i13.p1	3-515[+]	FZL_ARATH^FZL_ARATH^Q:21-171,H:491-641^65.6%ID^E:5.2e-47^RecName: Full=Probable transmembrane GTPase FZO-like, chloroplastic {ECO:0000305};^Eukaryota; Viridiplantae; Streptophyta; Embryophyta; Tracheophyta; Spermatophyta; Magnoliophyta; eudicotyledons; Gunneridae; Pentapetalae; rosids; malvids; Brassicales; Brassicaceae; Camelineae; Arabidopsis	.	.	.	COG0699^Dynamin family	KEGG:ath:AT1G03160	GO:0009507^cellular_component^chloroplast`GO:0009706^cellular_component^chloroplast inner membrane`GO:0031969^cellular_component^chloroplast membrane`GO:0009707^cellular_component^chloroplast outer membrane`GO:0009535^cellular_component^chloroplast thylakoid membrane`GO:0016021^cellular_component^integral component of membrane`GO:0005525^molecular_function^GTP binding`GO:0016787^molecular_functio…	.	.	.
TRINITY_DN76755_c0_g1	TRINITY_DN76755_c0_g1_i10	FZL_ARATH^FZL_ARATH^Q:112-1197,H:49-391^48.8%ID^E:3.4e-70^RecName: Full=Probable transmembrane GTPase FZO-like, chloroplastic {ECO:0000305};^Eukaryota; Viridiplantae; Streptophyta; Embryophyta; Tracheophyta; Spermatophyta; Magnoliophyta; eudicotyledons; Gunneridae; Pentapetalae; rosids; malvids; Brassicales; Brassicaceae; Camelineae; Arabidopsis`FZL_ARATH^FZL_ARATH^Q:3119-3352,H:417-494^82.1%ID^E…	.	TRINITY_DN76755_c0_g1_i10.p1	1-1092[+]	FZL_ARATH^FZL_ARATH^Q:38-358,H:49-354^51.4%ID^E:3.6e-69^RecName: Full=Probable transmembrane GTPase FZO-like, chloroplastic {ECO:0000305};^Eukaryota; Viridiplantae; Streptophyta; Embryophyta; Tracheophyta; Spermatophyta; Magnoliophyta; eudicotyledons; Gunneridae; Pentapetalae; rosids; malvids; Brassicales; Brassicaceae; Camelineae; Arabidopsis	.	.	.	COG0699^Dynamin family	KEGG:ath:AT1G03160	GO:0009507^cellular_component^chloroplast`GO:0009706^cellular_component^chloroplast inner membrane`GO:0031969^cellular_component^chloroplast membrane`GO:0009707^cellular_component^chloroplast outer membrane`GO:0009535^cellular_component^chloroplast thylakoid membrane`GO:0016021^cellular_component^integral component of membrane`GO:0005525^molecular_function^GTP binding`GO:0016787^molecular_functio…	.	.	.
TRINITY_DN76755_c0_g1	TRINITY_DN76755_c0_g1_i11	FZL_ARATH^FZL_ARATH^Q:1-708,H:495-697^54.7%ID^E:3.4e-60^RecName: Full=Probable transmembrane GTPase FZO-like, chloroplastic {ECO:0000305};^Eukaryota; Viridiplantae; Streptophyta; Embryophyta; Tracheophyta; Spermatophyta; Magnoliophyta; eudicotyledons; Gunneridae; Pentapetalae; rosids; malvids; Brassicales; Brassicaceae; Camelineae; Arabidopsis`FZL_ARATH^FZL_ARATH^Q:1014-1244,H:698-774^50.6%ID^E:4…	.	TRINITY_DN76755_c0_g1_i11.p1	1-462[+]	FZL_ARATH^FZL_ARATH^Q:1-148,H:495-642^66.2%ID^E:3.6e-47^RecName: Full=Probable transmembrane GTPase FZO-like, chloroplastic {ECO:0000305};^Eukaryota; Viridiplantae; Streptophyta; Embryophyta; Tracheophyta; Spermatophyta; Magnoliophyta; eudicotyledons; Gunneridae; Pentapetalae; rosids; malvids; Brassicales; Brassicaceae; Camelineae; Arabidopsis	.	.	.	COG0699^Dynamin family	KEGG:ath:AT1G03160	GO:0009507^cellular_component^chloroplast`GO:0009706^cellular_component^chloroplast inner membrane`GO:0031969^cellular_component^chloroplast membrane`GO:0009707^cellular_component^chloroplast outer membrane`GO:0009535^cellular_component^chloroplast thylakoid membrane`GO:0016021^cellular_component^integral component of membrane`GO:0005525^molecular_function^GTP binding`GO:0016787^molecular_functio…	.	.	.
TRINITY_DN76769_c1_g1	TRINITY_DN76769_c1_g1_i9	MIEL1_ARATH^MIEL1_ARATH^Q:140-358,H:1-71^69.9%ID^E:2.2e-25^RecName: Full=E3 ubiquitin-protein ligase MIEL1 {ECO:0000303|PubMed:23403577};^Eukaryota; Viridiplantae; Streptophyta; Embryophyta; Tracheophyta; Spermatophyta; Magnoliophyta; eudicotyledons; Gunneridae; Pentapetalae; rosids; malvids; Brassicales; Brassicaceae; Camelineae; Arabidopsis`MIEL1_ARATH^MIEL1_ARATH^Q:2200-2388,H:152-214^73%ID^E:…	.	.	.	.	.	.	.	ENOG410XXHF^ring finger and CHY zinc finger	KEGG:ath:AT5G18650`KO:K10144	GO:0005737^cellular_component^cytoplasm`GO:0005634^cellular_component^nucleus`GO:0008134^molecular_function^transcription factor binding`GO:0004842^molecular_function^ubiquitin-protein transferase activity`GO:0008270^molecular_function^zinc ion binding`GO:0006952^biological_process^defense response`GO:1900425^biological_process^negative regulation of defense response to bacterium`GO:1901485^biolo…	.	.	.
TRINITY_DN76769_c1_g1	TRINITY_DN76769_c1_g1_i8	MIEL1_ARATH^MIEL1_ARATH^Q:140-703,H:1-188^77.1%ID^E:1.9e-71^RecName: Full=E3 ubiquitin-protein ligase MIEL1 {ECO:0000303|PubMed:23403577};^Eukaryota; Viridiplantae; Streptophyta; Embryophyta; Tracheophyta; Spermatophyta; Magnoliophyta; eudicotyledons; Gunneridae; Pentapetalae; rosids; malvids; Brassicales; Brassicaceae; Camelineae; Arabidopsis	.	TRINITY_DN76769_c1_g1_i8.p1	140-703[+]	MIEL1_ARATH^MIEL1_ARATH^Q:1-188,H:1-188^77.1%ID^E:2e-71^RecName: Full=E3 ubiquitin-protein ligase MIEL1 {ECO:0000303|PubMed:23403577};^Eukaryota; Viridiplantae; Streptophyta; Embryophyta; Tracheophyta; Spermatophyta; Magnoliophyta; eudicotyledons; Gunneridae; Pentapetalae; rosids; malvids; Brassicales; Brassicaceae; Camelineae; Arabidopsis	PF05495.11^zf-CHY^CHY zinc finger^18-98^E:5.9e-22`PF13445.5^zf-RING_UBOX^RING-type zinc-finger^153-181^E:0.00019	.	.	ENOG410XXHF^ring finger and CHY zinc finger	KEGG:ath:AT5G18650`KO:K10144	GO:0005737^cellular_component^cytoplasm`GO:0005634^cellular_component^nucleus`GO:0008134^molecular_function^transcription factor binding`GO:0004842^molecular_function^ubiquitin-protein transferase activity`GO:0008270^molecular_function^zinc ion binding`GO:0006952^biological_process^defense response`GO:1900425^biological_process^negative regulation of defense response to bacterium`GO:1901485^biolo…	GO:0008270^molecular_function^zinc ion binding	.	.
TRINITY_DN76769_c1_g1	TRINITY_DN76769_c1_g1_i5	MIEL1_ARATH^MIEL1_ARATH^Q:140-748,H:1-203^70.4%ID^E:2.2e-70^RecName: Full=E3 ubiquitin-protein ligase MIEL1 {ECO:0000303|PubMed:23403577};^Eukaryota; Viridiplantae; Streptophyta; Embryophyta; Tracheophyta; Spermatophyta; Magnoliophyta; eudicotyledons; Gunneridae; Pentapetalae; rosids; malvids; Brassicales; Brassicaceae; Camelineae; Arabidopsis	.	TRINITY_DN76769_c1_g1_i5.p1	140-748[+]	MIEL1_ARATH^MIEL1_ARATH^Q:1-203,H:1-203^70.4%ID^E:1.8e-70^RecName: Full=E3 ubiquitin-protein ligase MIEL1 {ECO:0000303|PubMed:23403577};^Eukaryota; Viridiplantae; Streptophyta; Embryophyta; Tracheophyta; Spermatophyta; Magnoliophyta; eudicotyledons; Gunneridae; Pentapetalae; rosids; malvids; Brassicales; Brassicaceae; Camelineae; Arabidopsis	PF05495.11^zf-CHY^CHY zinc finger^18-98^E:7e-22`PF13639.5^zf-RING_2^Ring finger domain^152-195^E:9.6e-08`PF14634.5^zf-RING_5^zinc-RING finger domain^152-197^E:8.6e-07`PF00097.24^zf-C3HC4^Zinc finger, C3HC4 type (RING finger)^153-195^E:4e-07`PF13445.5^zf-RING_UBOX^RING-type zinc-finger^153-193^E:1.7e-06	.	.	ENOG410XXHF^ring finger and CHY zinc finger	KEGG:ath:AT5G18650`KO:K10144	GO:0005737^cellular_component^cytoplasm`GO:0005634^cellular_component^nucleus`GO:0008134^molecular_function^transcription factor binding`GO:0004842^molecular_function^ubiquitin-protein transferase activity`GO:0008270^molecular_function^zinc ion binding`GO:0006952^biological_process^defense response`GO:1900425^biological_process^negative regulation of defense response to bacterium`GO:1901485^biolo…	GO:0008270^molecular_function^zinc ion binding`GO:0046872^molecular_function^metal ion binding	.	.
TRINITY_DN76769_c1_g1	TRINITY_DN76769_c1_g1_i4	MIEL1_ARATH^MIEL1_ARATH^Q:140-358,H:1-71^69.9%ID^E:2.3e-25^RecName: Full=E3 ubiquitin-protein ligase MIEL1 {ECO:0000303|PubMed:23403577};^Eukaryota; Viridiplantae; Streptophyta; Embryophyta; Tracheophyta; Spermatophyta; Magnoliophyta; eudicotyledons; Gunneridae; Pentapetalae; rosids; malvids; Brassicales; Brassicaceae; Camelineae; Arabidopsis`MIEL1_ARATH^MIEL1_ARATH^Q:2200-2487,H:152-214^47.9%ID^…	.	.	.	.	.	.	.	ENOG410XXHF^ring finger and CHY zinc finger	KEGG:ath:AT5G18650`KO:K10144	GO:0005737^cellular_component^cytoplasm`GO:0005634^cellular_component^nucleus`GO:0008134^molecular_function^transcription factor binding`GO:0004842^molecular_function^ubiquitin-protein transferase activity`GO:0008270^molecular_function^zinc ion binding`GO:0006952^biological_process^defense response`GO:1900425^biological_process^negative regulation of defense response to bacterium`GO:1901485^biolo…	.	.	.
TRINITY_DN76769_c1_g1	TRINITY_DN76769_c1_g1_i7	MIEL1_ARATH^MIEL1_ARATH^Q:2362-2709,H:152-267^81%ID^E:1.2e-54^RecName: Full=E3 ubiquitin-protein ligase MIEL1 {ECO:0000303|PubMed:23403577};^Eukaryota; Viridiplantae; Streptophyta; Embryophyta; Tracheophyta; Spermatophyta; Magnoliophyta; eudicotyledons; Gunneridae; Pentapetalae; rosids; malvids; Brassicales; Brassicaceae; Camelineae; Arabidopsis`MIEL1_ARATH^MIEL1_ARATH^Q:140-277,H:1-46^78.3%ID^E:…	.	.	.	.	.	.	.	ENOG410XXHF^ring finger and CHY zinc finger	KEGG:ath:AT5G18650`KO:K10144	GO:0005737^cellular_component^cytoplasm`GO:0005634^cellular_component^nucleus`GO:0008134^molecular_function^transcription factor binding`GO:0004842^molecular_function^ubiquitin-protein transferase activity`GO:0008270^molecular_function^zinc ion binding`GO:0006952^biological_process^defense response`GO:1900425^biological_process^negative regulation of defense response to bacterium`GO:1901485^biolo…	.	.	.
TRINITY_DN76769_c1_g1	TRINITY_DN76769_c1_g1_i1	.	.	.	.	.	.	.	.	.	.	.	.	.	.
TRINITY_DN76769_c1_g1	TRINITY_DN76769_c1_g1_i3	MIEL1_ARATH^MIEL1_ARATH^Q:2200-2547,H:152-267^81%ID^E:1.1e-54^RecName: Full=E3 ubiquitin-protein ligase MIEL1 {ECO:0000303|PubMed:23403577};^Eukaryota; Viridiplantae; Streptophyta; Embryophyta; Tracheophyta; Spermatophyta; Magnoliophyta; eudicotyledons; Gunneridae; Pentapetalae; rosids; malvids; Brassicales; Brassicaceae; Camelineae; Arabidopsis`MIEL1_ARATH^MIEL1_ARATH^Q:140-358,H:1-71^69.9%ID^E:…	.	.	.	.	.	.	.	ENOG410XXHF^ring finger and CHY zinc finger	KEGG:ath:AT5G18650`KO:K10144	GO:0005737^cellular_component^cytoplasm`GO:0005634^cellular_component^nucleus`GO:0008134^molecular_function^transcription factor binding`GO:0004842^molecular_function^ubiquitin-protein transferase activity`GO:0008270^molecular_function^zinc ion binding`GO:0006952^biological_process^defense response`GO:1900425^biological_process^negative regulation of defense response to bacterium`GO:1901485^biolo…	.	.	.
TRINITY_DN76769_c1_g1	TRINITY_DN76769_c1_g1_i2	MIEL1_ARATH^MIEL1_ARATH^Q:140-820,H:1-188^63.9%ID^E:1.8e-65^RecName: Full=E3 ubiquitin-protein ligase MIEL1 {ECO:0000303|PubMed:23403577};^Eukaryota; Viridiplantae; Streptophyta; Embryophyta; Tracheophyta; Spermatophyta; Magnoliophyta; eudicotyledons; Gunneridae; Pentapetalae; rosids; malvids; Brassicales; Brassicaceae; Camelineae; Arabidopsis	.	TRINITY_DN76769_c1_g1_i2.p1	140-820[+]	MIEL1_ARATH^MIEL1_ARATH^Q:1-227,H:1-188^63.9%ID^E:2.5e-65^RecName: Full=E3 ubiquitin-protein ligase MIEL1 {ECO:0000303|PubMed:23403577};^Eukaryota; Viridiplantae; Streptophyta; Embryophyta; Tracheophyta; Spermatophyta; Magnoliophyta; eudicotyledons; Gunneridae; Pentapetalae; rosids; malvids; Brassicales; Brassicaceae; Camelineae; Arabidopsis	PF05495.11^zf-CHY^CHY zinc finger^57-137^E:9e-22`PF13445.5^zf-RING_UBOX^RING-type zinc-finger^192-220^E:0.00025	.	ExpAA=22.51^PredHel=1^Topology=o33-55i	ENOG410XXHF^ring finger and CHY zinc finger	KEGG:ath:AT5G18650`KO:K10144	GO:0005737^cellular_component^cytoplasm`GO:0005634^cellular_component^nucleus`GO:0008134^molecular_function^transcription factor binding`GO:0004842^molecular_function^ubiquitin-protein transferase activity`GO:0008270^molecular_function^zinc ion binding`GO:0006952^biological_process^defense response`GO:1900425^biological_process^negative regulation of defense response to bacterium`GO:1901485^biolo…	GO:0008270^molecular_function^zinc ion binding	.	.
TRINITY_DN76769_c2_g1	TRINITY_DN76769_c2_g1_i2	UGDH1_SOYBN^UGDH1_SOYBN^Q:872-3,H:1-290^94.5%ID^E:6.7e-155^RecName: Full=UDP-glucose 6-dehydrogenase 1;^Eukaryota; Viridiplantae; Streptophyta; Embryophyta; Tracheophyta; Spermatophyta; Magnoliophyta; eudicotyledons; Gunneridae; Pentapetalae; rosids; fabids; Fabales; Fabaceae; Papilionoideae; Phaseoleae; Glycine; Soja	.	TRINITY_DN76769_c2_g1_i2.p1	3-938[-]	UGDH1_SOYBN^UGDH1_SOYBN^Q:23-312,H:1-290^94.5%ID^E:6.2e-155^RecName: Full=UDP-glucose 6-dehydrogenase 1;^Eukaryota; Viridiplantae; Streptophyta; Embryophyta; Tracheophyta; Spermatophyta; Magnoliophyta; eudicotyledons; Gunneridae; Pentapetalae; rosids; fabids; Fabales; Fabaceae; Papilionoideae; Phaseoleae; Glycine; Soja	PF03721.13^UDPG_MGDP_dh_N^UDP-glucose/GDP-mannose dehydrogenase family, NAD binding domain^25-208^E:6.3e-67`PF00984.18^UDPG_MGDP_dh^UDP-glucose/GDP-mannose dehydrogenase family, central domain^232-311^E:1.5e-28	.	.	COG1004^UDP-glucose 6-dehydrogenase	KEGG:gmx:548074`KO:K00012	GO:0005829^cellular_component^cytosol`GO:0005634^cellular_component^nucleus`GO:0051287^molecular_function^NAD binding`GO:0003979^molecular_function^UDP-glucose 6-dehydrogenase activity`GO:0006024^biological_process^glycosaminoglycan biosynthetic process`GO:0006065^biological_process^UDP-glucuronate biosynthetic process	GO:0016616^molecular_function^oxidoreductase activity, acting on the CH-OH group of donors, NAD or NADP as acceptor`GO:0051287^molecular_function^NAD binding`GO:0055114^biological_process^oxidation-reduction process	.	.
TRINITY_DN76769_c2_g1	TRINITY_DN76769_c2_g1_i3	UGDH1_SOYBN^UGDH1_SOYBN^Q:872-3,H:1-290^94.5%ID^E:8.8e-155^RecName: Full=UDP-glucose 6-dehydrogenase 1;^Eukaryota; Viridiplantae; Streptophyta; Embryophyta; Tracheophyta; Spermatophyta; Magnoliophyta; eudicotyledons; Gunneridae; Pentapetalae; rosids; fabids; Fabales; Fabaceae; Papilionoideae; Phaseoleae; Glycine; Soja	.	TRINITY_DN76769_c2_g1_i3.p1	3-872[-]	UGDH1_SOYBN^UGDH1_SOYBN^Q:1-290,H:1-290^94.5%ID^E:1.3e-154^RecName: Full=UDP-glucose 6-dehydrogenase 1;^Eukaryota; Viridiplantae; Streptophyta; Embryophyta; Tracheophyta; Spermatophyta; Magnoliophyta; eudicotyledons; Gunneridae; Pentapetalae; rosids; fabids; Fabales; Fabaceae; Papilionoideae; Phaseoleae; Glycine; Soja	PF03721.13^UDPG_MGDP_dh_N^UDP-glucose/GDP-mannose dehydrogenase family, NAD binding domain^3-186^E:5.1e-67`PF00984.18^UDPG_MGDP_dh^UDP-glucose/GDP-mannose dehydrogenase family, central domain^210-289^E:1.3e-28	.	.	COG1004^UDP-glucose 6-dehydrogenase	KEGG:gmx:548074`KO:K00012	GO:0005829^cellular_component^cytosol`GO:0005634^cellular_component^nucleus`GO:0051287^molecular_function^NAD binding`GO:0003979^molecular_function^UDP-glucose 6-dehydrogenase activity`GO:0006024^biological_process^glycosaminoglycan biosynthetic process`GO:0006065^biological_process^UDP-glucuronate biosynthetic process	GO:0016616^molecular_function^oxidoreductase activity, acting on the CH-OH group of donors, NAD or NADP as acceptor`GO:0051287^molecular_function^NAD binding`GO:0055114^biological_process^oxidation-reduction process	.	.
TRINITY_DN76769_c2_g1	TRINITY_DN76769_c2_g1_i1	UGDH1_SOYBN^UGDH1_SOYBN^Q:872-3,H:1-290^94.5%ID^E:8.1e-155^RecName: Full=UDP-glucose 6-dehydrogenase 1;^Eukaryota; Viridiplantae; Streptophyta; Embryophyta; Tracheophyta; Spermatophyta; Magnoliophyta; eudicotyledons; Gunneridae; Pentapetalae; rosids; fabids; Fabales; Fabaceae; Papilionoideae; Phaseoleae; Glycine; Soja	.	TRINITY_DN76769_c2_g1_i1.p1	3-824[-]	UGDH1_SOYBN^UGDH1_SOYBN^Q:1-274,H:17-290^94.5%ID^E:1.9e-144^RecName: Full=UDP-glucose 6-dehydrogenase 1;^Eukaryota; Viridiplantae; Streptophyta; Embryophyta; Tracheophyta; Spermatophyta; Magnoliophyta; eudicotyledons; Gunneridae; Pentapetalae; rosids; fabids; Fabales; Fabaceae; Papilionoideae; Phaseoleae; Glycine; Soja	PF03721.13^UDPG_MGDP_dh_N^UDP-glucose/GDP-mannose dehydrogenase family, NAD binding domain^2-170^E:4.8e-57`PF00984.18^UDPG_MGDP_dh^UDP-glucose/GDP-mannose dehydrogenase family, central domain^194-273^E:1.2e-28	.	.	COG1004^UDP-glucose 6-dehydrogenase	KEGG:gmx:548074`KO:K00012	GO:0005829^cellular_component^cytosol`GO:0005634^cellular_component^nucleus`GO:0051287^molecular_function^NAD binding`GO:0003979^molecular_function^UDP-glucose 6-dehydrogenase activity`GO:0006024^biological_process^glycosaminoglycan biosynthetic process`GO:0006065^biological_process^UDP-glucuronate biosynthetic process	GO:0016616^molecular_function^oxidoreductase activity, acting on the CH-OH group of donors, NAD or NADP as acceptor`GO:0051287^molecular_function^NAD binding`GO:0055114^biological_process^oxidation-reduction process	.	.
TRINITY_DN76769_c2_g1	TRINITY_DN76769_c2_g1_i4	.	.	.	.	.	.	.	.	.	.	.	.	.	.
TRINITY_DN76769_c2_g1	TRINITY_DN76769_c2_g1_i5	UGDH1_SOYBN^UGDH1_SOYBN^Q:872-3,H:1-290^94.5%ID^E:1.2e-154^RecName: Full=UDP-glucose 6-dehydrogenase 1;^Eukaryota; Viridiplantae; Streptophyta; Embryophyta; Tracheophyta; Spermatophyta; Magnoliophyta; eudicotyledons; Gunneridae; Pentapetalae; rosids; fabids; Fabales; Fabaceae; Papilionoideae; Phaseoleae; Glycine; Soja	.	TRINITY_DN76769_c2_g1_i5.p1	3-938[-]	UGDH1_SOYBN^UGDH1_SOYBN^Q:23-312,H:1-290^94.5%ID^E:6.2e-155^RecName: Full=UDP-glucose 6-dehydrogenase 1;^Eukaryota; Viridiplantae; Streptophyta; Embryophyta; Tracheophyta; Spermatophyta; Magnoliophyta; eudicotyledons; Gunneridae; Pentapetalae; rosids; fabids; Fabales; Fabaceae; Papilionoideae; Phaseoleae; Glycine; Soja	PF03721.13^UDPG_MGDP_dh_N^UDP-glucose/GDP-mannose dehydrogenase family, NAD binding domain^25-208^E:6.3e-67`PF00984.18^UDPG_MGDP_dh^UDP-glucose/GDP-mannose dehydrogenase family, central domain^232-311^E:1.5e-28	.	.	COG1004^UDP-glucose 6-dehydrogenase	KEGG:gmx:548074`KO:K00012	GO:0005829^cellular_component^cytosol`GO:0005634^cellular_component^nucleus`GO:0051287^molecular_function^NAD binding`GO:0003979^molecular_function^UDP-glucose 6-dehydrogenase activity`GO:0006024^biological_process^glycosaminoglycan biosynthetic process`GO:0006065^biological_process^UDP-glucuronate biosynthetic process	GO:0016616^molecular_function^oxidoreductase activity, acting on the CH-OH group of donors, NAD or NADP as acceptor`GO:0051287^molecular_function^NAD binding`GO:0055114^biological_process^oxidation-reduction process	.	.
TRINITY_DN76731_c0_g2	TRINITY_DN76731_c0_g2_i9	PPR73_ARATH^PPR73_ARATH^Q:1116-2069,H:298-615^49.5%ID^E:1.7e-84^RecName: Full=Pentatricopeptide repeat-containing protein At1g43980, mitochondrial;^Eukaryota; Viridiplantae; Streptophyta; Embryophyta; Tracheophyta; Spermatophyta; Magnoliophyta; eudicotyledons; Gunneridae; Pentapetalae; rosids; malvids; Brassicales; Brassicaceae; Camelineae; Arabidopsis`PPR73_ARATH^PPR73_ARATH^Q:319-1113,H:1-265^6…	.	TRINITY_DN76731_c0_g2_i9.p1	1221-2087[+]	PPR73_ARATH^PPR73_ARATH^Q:1-283,H:333-615^49.3%ID^E:1.9e-73^RecName: Full=Pentatricopeptide repeat-containing protein At1g43980, mitochondrial;^Eukaryota; Viridiplantae; Streptophyta; Embryophyta; Tracheophyta; Spermatophyta; Magnoliophyta; eudicotyledons; Gunneridae; Pentapetalae; rosids; malvids; Brassicales; Brassicaceae; Camelineae; Arabidopsis	PF01535.19^PPR^PPR repeat^53-78^E:0.2`PF01535.19^PPR^PPR repeat^83-110^E:4.4e-06`PF01535.19^PPR^PPR repeat^156-179^E:0.82	.	.	ENOG410Z7Z7^Pentatricopeptide repeat-containing protein	KEGG:ath:AT1G43980	GO:0043231^cellular_component^intracellular membrane-bounded organelle`GO:0005739^cellular_component^mitochondrion`GO:0004519^molecular_function^endonuclease activity`GO:0003723^molecular_function^RNA binding`GO:0009451^biological_process^RNA modification	.	.	.
TRINITY_DN76731_c0_g2	TRINITY_DN76731_c0_g2_i8	PPR73_ARATH^PPR73_ARATH^Q:319-2199,H:1-627^55.3%ID^E:3.7e-153^RecName: Full=Pentatricopeptide repeat-containing protein At1g43980, mitochondrial;^Eukaryota; Viridiplantae; Streptophyta; Embryophyta; Tracheophyta; Spermatophyta; Magnoliophyta; eudicotyledons; Gunneridae; Pentapetalae; rosids; malvids; Brassicales; Brassicaceae; Camelineae; Arabidopsis	.	TRINITY_DN76731_c0_g2_i8.p1	319-2232[+]	PPR73_ARATH^PPR73_ARATH^Q:1-627,H:1-627^55.3%ID^E:2.4e-153^RecName: Full=Pentatricopeptide repeat-containing protein At1g43980, mitochondrial;^Eukaryota; Viridiplantae; Streptophyta; Embryophyta; Tracheophyta; Spermatophyta; Magnoliophyta; eudicotyledons; Gunneridae; Pentapetalae; rosids; malvids; Brassicales; Brassicaceae; Camelineae; Arabidopsis	PF01535.19^PPR^PPR repeat^83-111^E:0.0074`PF13041.5^PPR_2^PPR repeat family^112-155^E:5e-12`PF13812.5^PPR_3^Pentatricopeptide repeat domain^112-155^E:0.0029`PF01535.19^PPR^PPR repeat^114-144^E:4.9e-08`PF01535.19^PPR^PPR repeat^185-210^E:0.0014`PF01535.19^PPR^PPR repeat^213-240^E:0.34`PF01535.19^PPR^PPR repeat^248-278^E:1.1`PF01535.19^PPR^PPR repeat^317-337^E:0.013`PF01535.19^PPR^PPR repeat^385-41…	.	.	ENOG410Z7Z7^Pentatricopeptide repeat-containing protein	KEGG:ath:AT1G43980	GO:0043231^cellular_component^intracellular membrane-bounded organelle`GO:0005739^cellular_component^mitochondrion`GO:0004519^molecular_function^endonuclease activity`GO:0003723^molecular_function^RNA binding`GO:0009451^biological_process^RNA modification	.	.	.
TRINITY_DN76731_c0_g2	TRINITY_DN76731_c0_g2_i1	.	.	.	.	.	.	.	.	.	.	.	.	.	.
TRINITY_DN76731_c0_g2	TRINITY_DN76731_c0_g2_i5	PPR73_ARATH^PPR73_ARATH^Q:319-2199,H:1-627^55.3%ID^E:3.1e-153^RecName: Full=Pentatricopeptide repeat-containing protein At1g43980, mitochondrial;^Eukaryota; Viridiplantae; Streptophyta; Embryophyta; Tracheophyta; Spermatophyta; Magnoliophyta; eudicotyledons; Gunneridae; Pentapetalae; rosids; malvids; Brassicales; Brassicaceae; Camelineae; Arabidopsis	.	TRINITY_DN76731_c0_g2_i5.p1	319-2232[+]	PPR73_ARATH^PPR73_ARATH^Q:1-627,H:1-627^55.3%ID^E:2.4e-153^RecName: Full=Pentatricopeptide repeat-containing protein At1g43980, mitochondrial;^Eukaryota; Viridiplantae; Streptophyta; Embryophyta; Tracheophyta; Spermatophyta; Magnoliophyta; eudicotyledons; Gunneridae; Pentapetalae; rosids; malvids; Brassicales; Brassicaceae; Camelineae; Arabidopsis	PF01535.19^PPR^PPR repeat^83-111^E:0.0074`PF13041.5^PPR_2^PPR repeat family^112-155^E:5e-12`PF13812.5^PPR_3^Pentatricopeptide repeat domain^112-155^E:0.0029`PF01535.19^PPR^PPR repeat^114-144^E:4.9e-08`PF01535.19^PPR^PPR repeat^185-210^E:0.0014`PF01535.19^PPR^PPR repeat^213-240^E:0.34`PF01535.19^PPR^PPR repeat^248-278^E:1.1`PF01535.19^PPR^PPR repeat^317-337^E:0.013`PF01535.19^PPR^PPR repeat^385-41…	.	.	ENOG410Z7Z7^Pentatricopeptide repeat-containing protein	KEGG:ath:AT1G43980	GO:0043231^cellular_component^intracellular membrane-bounded organelle`GO:0005739^cellular_component^mitochondrion`GO:0004519^molecular_function^endonuclease activity`GO:0003723^molecular_function^RNA binding`GO:0009451^biological_process^RNA modification	.	.	.
TRINITY_DN76731_c0_g2	TRINITY_DN76731_c0_g2_i4	PPR73_ARATH^PPR73_ARATH^Q:319-2199,H:1-627^55.3%ID^E:3.7e-153^RecName: Full=Pentatricopeptide repeat-containing protein At1g43980, mitochondrial;^Eukaryota; Viridiplantae; Streptophyta; Embryophyta; Tracheophyta; Spermatophyta; Magnoliophyta; eudicotyledons; Gunneridae; Pentapetalae; rosids; malvids; Brassicales; Brassicaceae; Camelineae; Arabidopsis	.	TRINITY_DN76731_c0_g2_i4.p1	319-2232[+]	PPR73_ARATH^PPR73_ARATH^Q:1-627,H:1-627^55.3%ID^E:2.4e-153^RecName: Full=Pentatricopeptide repeat-containing protein At1g43980, mitochondrial;^Eukaryota; Viridiplantae; Streptophyta; Embryophyta; Tracheophyta; Spermatophyta; Magnoliophyta; eudicotyledons; Gunneridae; Pentapetalae; rosids; malvids; Brassicales; Brassicaceae; Camelineae; Arabidopsis	PF01535.19^PPR^PPR repeat^83-111^E:0.0074`PF13041.5^PPR_2^PPR repeat family^112-155^E:5e-12`PF13812.5^PPR_3^Pentatricopeptide repeat domain^112-155^E:0.0029`PF01535.19^PPR^PPR repeat^114-144^E:4.9e-08`PF01535.19^PPR^PPR repeat^185-210^E:0.0014`PF01535.19^PPR^PPR repeat^213-240^E:0.34`PF01535.19^PPR^PPR repeat^248-278^E:1.1`PF01535.19^PPR^PPR repeat^317-337^E:0.013`PF01535.19^PPR^PPR repeat^385-41…	.	.	ENOG410Z7Z7^Pentatricopeptide repeat-containing protein	KEGG:ath:AT1G43980	GO:0043231^cellular_component^intracellular membrane-bounded organelle`GO:0005739^cellular_component^mitochondrion`GO:0004519^molecular_function^endonuclease activity`GO:0003723^molecular_function^RNA binding`GO:0009451^biological_process^RNA modification	.	.	.
TRINITY_DN76731_c0_g2	TRINITY_DN76731_c0_g2_i7	PPR73_ARATH^PPR73_ARATH^Q:1116-2105,H:298-627^48.9%ID^E:7e-86^RecName: Full=Pentatricopeptide repeat-containing protein At1g43980, mitochondrial;^Eukaryota; Viridiplantae; Streptophyta; Embryophyta; Tracheophyta; Spermatophyta; Magnoliophyta; eudicotyledons; Gunneridae; Pentapetalae; rosids; malvids; Brassicales; Brassicaceae; Camelineae; Arabidopsis`PPR73_ARATH^PPR73_ARATH^Q:319-1113,H:1-265^60.…	.	TRINITY_DN76731_c0_g2_i7.p1	1221-2138[+]	PPR73_ARATH^PPR73_ARATH^Q:1-295,H:333-627^48.6%ID^E:8.2e-75^RecName: Full=Pentatricopeptide repeat-containing protein At1g43980, mitochondrial;^Eukaryota; Viridiplantae; Streptophyta; Embryophyta; Tracheophyta; Spermatophyta; Magnoliophyta; eudicotyledons; Gunneridae; Pentapetalae; rosids; malvids; Brassicales; Brassicaceae; Camelineae; Arabidopsis	PF01535.19^PPR^PPR repeat^53-78^E:0.21`PF01535.19^PPR^PPR repeat^83-110^E:4.8e-06`PF01535.19^PPR^PPR repeat^156-179^E:0.88	.	.	ENOG410Z7Z7^Pentatricopeptide repeat-containing protein	KEGG:ath:AT1G43980	GO:0043231^cellular_component^intracellular membrane-bounded organelle`GO:0005739^cellular_component^mitochondrion`GO:0004519^molecular_function^endonuclease activity`GO:0003723^molecular_function^RNA binding`GO:0009451^biological_process^RNA modification	.	.	.
TRINITY_DN76731_c0_g2	TRINITY_DN76731_c0_g2_i6	PPR73_ARATH^PPR73_ARATH^Q:319-2163,H:1-615^55.7%ID^E:7.6e-152^RecName: Full=Pentatricopeptide repeat-containing protein At1g43980, mitochondrial;^Eukaryota; Viridiplantae; Streptophyta; Embryophyta; Tracheophyta; Spermatophyta; Magnoliophyta; eudicotyledons; Gunneridae; Pentapetalae; rosids; malvids; Brassicales; Brassicaceae; Camelineae; Arabidopsis	.	TRINITY_DN76731_c0_g2_i6.p1	319-2181[+]	PPR73_ARATH^PPR73_ARATH^Q:1-615,H:1-615^55.7%ID^E:4.4e-152^RecName: Full=Pentatricopeptide repeat-containing protein At1g43980, mitochondrial;^Eukaryota; Viridiplantae; Streptophyta; Embryophyta; Tracheophyta; Spermatophyta; Magnoliophyta; eudicotyledons; Gunneridae; Pentapetalae; rosids; malvids; Brassicales; Brassicaceae; Camelineae; Arabidopsis	PF01535.19^PPR^PPR repeat^83-111^E:0.0071`PF13041.5^PPR_2^PPR repeat family^112-155^E:4.8e-12`PF13812.5^PPR_3^Pentatricopeptide repeat domain^112-155^E:0.0028`PF01535.19^PPR^PPR repeat^114-144^E:4.7e-08`PF01535.19^PPR^PPR repeat^185-210^E:0.0014`PF01535.19^PPR^PPR repeat^213-240^E:0.33`PF01535.19^PPR^PPR repeat^248-278^E:1`PF01535.19^PPR^PPR repeat^317-337^E:0.013`PF01535.19^PPR^PPR repeat^385-41…	.	.	ENOG410Z7Z7^Pentatricopeptide repeat-containing protein	KEGG:ath:AT1G43980	GO:0043231^cellular_component^intracellular membrane-bounded organelle`GO:0005739^cellular_component^mitochondrion`GO:0004519^molecular_function^endonuclease activity`GO:0003723^molecular_function^RNA binding`GO:0009451^biological_process^RNA modification	.	.	.
TRINITY_DN76738_c0_g1	TRINITY_DN76738_c0_g1_i4	.	.	TRINITY_DN76738_c0_g1_i4.p1	450-1466[-]	.	.	.	.	.	.	.	.	.	.
TRINITY_DN76738_c0_g1	TRINITY_DN76738_c0_g1_i5	.	.	TRINITY_DN76738_c0_g1_i5.p1	3-1661[-]	.	.	.	.	.	.	.	.	.	.
TRINITY_DN76738_c0_g1	TRINITY_DN76738_c0_g1_i6	.	.	.	.	.	.	.	.	.	.	.	.	.	.
TRINITY_DN76738_c0_g1	TRINITY_DN76738_c0_g1_i7	.	.	TRINITY_DN76738_c0_g1_i7.p1	3-1256[-]	.	.	.	.	.	.	.	.	.	.
TRINITY_DN76738_c0_g1	TRINITY_DN76738_c0_g1_i1	.	.	TRINITY_DN76738_c0_g1_i1.p1	3-1661[-]	.	.	.	.	.	.	.	.	.	.
TRINITY_DN76738_c0_g1	TRINITY_DN76738_c0_g1_i2	.	.	TRINITY_DN76738_c0_g1_i2.p2	658-1122[-]	.	.	.	.	.	.	.	.	.	.
TRINITY_DN76738_c0_g1	TRINITY_DN76738_c0_g1_i3	.	.	TRINITY_DN76738_c0_g1_i3.p1	3-1928[-]	.	.	.	.	.	.	.	.	.	.
TRINITY_DN76738_c0_g1	TRINITY_DN76738_c0_g1_i8	.	.	.	.	.	.	.	.	.	.	.	.	.	.
TRINITY_DN76738_c0_g1	TRINITY_DN76738_c0_g1_i9	.	.	.	.	.	.	.	.	.	.	.	.	.	.
TRINITY_DN76738_c0_g1	TRINITY_DN76738_c0_g1_i10	.	.	.	.	.	.	.	.	.	.	.	.	.	.
TRINITY_DN76797_c0_g2	TRINITY_DN76797_c0_g2_i1	AMPD_ARATH^AMPD_ARATH^Q:3624-2800,H:234-418^40.2%ID^E:3.6e-44^RecName: Full=AMP deaminase {ECO:0000303|PubMed:15918887};^Eukaryota; Viridiplantae; Streptophyta; Embryophyta; Tracheophyta; Spermatophyta; Magnoliophyta; eudicotyledons; Gunneridae; Pentapetalae; rosids; malvids; Brassicales; Brassicaceae; Camelineae; Arabidopsis`AMPD_ARATH^AMPD_ARATH^Q:2618-2340,H:417-509^88.2%ID^E:3.7e-41^RecName: …	.	TRINITY_DN76797_c0_g2_i1.p4	2761-3105[-]	AMPD_ARATH^AMPD_ARATH^Q:2-102,H:318-418^77.2%ID^E:9.9e-42^RecName: Full=AMP deaminase {ECO:0000303|PubMed:15918887};^Eukaryota; Viridiplantae; Streptophyta; Embryophyta; Tracheophyta; Spermatophyta; Magnoliophyta; eudicotyledons; Gunneridae; Pentapetalae; rosids; malvids; Brassicales; Brassicaceae; Camelineae; Arabidopsis	PF00962.21^A_deaminase^Adenosine/AMP deaminase^68-103^E:5.2e-12	.	.	COG1816^adenosine deaminase	KEGG:ath:AT2G38280`KO:K01490	GO:0005829^cellular_component^cytosol`GO:0005783^cellular_component^endoplasmic reticulum`GO:0031307^cellular_component^integral component of mitochondrial outer membrane`GO:0043231^cellular_component^intracellular membrane-bounded organelle`GO:0005634^cellular_component^nucleus`GO:0003876^molecular_function^AMP deaminase activity`GO:0005524^molecular_function^ATP binding`GO:0046872^molecular_fun…	GO:0019239^molecular_function^deaminase activity	.	.
TRINITY_DN76797_c0_g2	TRINITY_DN76797_c0_g2_i3	AMPD_ARATH^AMPD_ARATH^Q:2472-1240,H:234-554^54.1%ID^E:7.2e-114^RecName: Full=AMP deaminase {ECO:0000303|PubMed:15918887};^Eukaryota; Viridiplantae; Streptophyta; Embryophyta; Tracheophyta; Spermatophyta; Magnoliophyta; eudicotyledons; Gunneridae; Pentapetalae; rosids; malvids; Brassicales; Brassicaceae; Camelineae; Arabidopsis	.	TRINITY_DN76797_c0_g2_i3.p2	1234-1953[-]	AMPD_ARATH^AMPD_ARATH^Q:2-238,H:318-554^80.2%ID^E:9.4e-111^RecName: Full=AMP deaminase {ECO:0000303|PubMed:15918887};^Eukaryota; Viridiplantae; Streptophyta; Embryophyta; Tracheophyta; Spermatophyta; Magnoliophyta; eudicotyledons; Gunneridae; Pentapetalae; rosids; malvids; Brassicales; Brassicaceae; Camelineae; Arabidopsis	PF00962.21^A_deaminase^Adenosine/AMP deaminase^68-236^E:2.7e-23	.	.	COG1816^adenosine deaminase	KEGG:ath:AT2G38280`KO:K01490	GO:0005829^cellular_component^cytosol`GO:0005783^cellular_component^endoplasmic reticulum`GO:0031307^cellular_component^integral component of mitochondrial outer membrane`GO:0043231^cellular_component^intracellular membrane-bounded organelle`GO:0005634^cellular_component^nucleus`GO:0003876^molecular_function^AMP deaminase activity`GO:0005524^molecular_function^ATP binding`GO:0046872^molecular_fun…	GO:0019239^molecular_function^deaminase activity	.	.
TRINITY_DN76797_c0_g2	TRINITY_DN76797_c0_g2_i2	AMPD_ARATH^AMPD_ARATH^Q:2037-1240,H:318-554^71.8%ID^E:5.1e-106^RecName: Full=AMP deaminase {ECO:0000303|PubMed:15918887};^Eukaryota; Viridiplantae; Streptophyta; Embryophyta; Tracheophyta; Spermatophyta; Magnoliophyta; eudicotyledons; Gunneridae; Pentapetalae; rosids; malvids; Brassicales; Brassicaceae; Camelineae; Arabidopsis`AMPD_ARATH^AMPD_ARATH^Q:2579-2178,H:188-316^35%ID^E:6.6e-13^RecName: F…	.	TRINITY_DN76797_c0_g2_i2.p1	1234-2040[-]	AMPD_ARATH^AMPD_ARATH^Q:2-267,H:318-554^71.8%ID^E:2.1e-106^RecName: Full=AMP deaminase {ECO:0000303|PubMed:15918887};^Eukaryota; Viridiplantae; Streptophyta; Embryophyta; Tracheophyta; Spermatophyta; Magnoliophyta; eudicotyledons; Gunneridae; Pentapetalae; rosids; malvids; Brassicales; Brassicaceae; Camelineae; Arabidopsis	PF00962.21^A_deaminase^Adenosine/AMP deaminase^97-265^E:3.8e-23	.	.	COG1816^adenosine deaminase	KEGG:ath:AT2G38280`KO:K01490	GO:0005829^cellular_component^cytosol`GO:0005783^cellular_component^endoplasmic reticulum`GO:0031307^cellular_component^integral component of mitochondrial outer membrane`GO:0043231^cellular_component^intracellular membrane-bounded organelle`GO:0005634^cellular_component^nucleus`GO:0003876^molecular_function^AMP deaminase activity`GO:0005524^molecular_function^ATP binding`GO:0046872^molecular_fun…	GO:0019239^molecular_function^deaminase activity	.	.
TRINITY_DN76797_c0_g2	TRINITY_DN76797_c0_g2_i5	AMPD_ARATH^AMPD_ARATH^Q:1433-3,H:234-620^60.3%ID^E:3.2e-156^RecName: Full=AMP deaminase {ECO:0000303|PubMed:15918887};^Eukaryota; Viridiplantae; Streptophyta; Embryophyta; Tracheophyta; Spermatophyta; Magnoliophyta; eudicotyledons; Gunneridae; Pentapetalae; rosids; malvids; Brassicales; Brassicaceae; Camelineae; Arabidopsis	.	TRINITY_DN76797_c0_g2_i5.p2	3-914[-]	AMPD_ARATH^AMPD_ARATH^Q:2-304,H:318-620^84.2%ID^E:3.3e-153^RecName: Full=AMP deaminase {ECO:0000303|PubMed:15918887};^Eukaryota; Viridiplantae; Streptophyta; Embryophyta; Tracheophyta; Spermatophyta; Magnoliophyta; eudicotyledons; Gunneridae; Pentapetalae; rosids; malvids; Brassicales; Brassicaceae; Camelineae; Arabidopsis	PF00962.21^A_deaminase^Adenosine/AMP deaminase^68-304^E:1.5e-46	.	.	COG1816^adenosine deaminase	KEGG:ath:AT2G38280`KO:K01490	GO:0005829^cellular_component^cytosol`GO:0005783^cellular_component^endoplasmic reticulum`GO:0031307^cellular_component^integral component of mitochondrial outer membrane`GO:0043231^cellular_component^intracellular membrane-bounded organelle`GO:0005634^cellular_component^nucleus`GO:0003876^molecular_function^AMP deaminase activity`GO:0005524^molecular_function^ATP binding`GO:0046872^molecular_fun…	GO:0019239^molecular_function^deaminase activity	.	.
TRINITY_DN76797_c0_g2	TRINITY_DN76797_c0_g2_i4	AMPD_ARATH^AMPD_ARATH^Q:542-3,H:441-620^88.3%ID^E:1.5e-92^RecName: Full=AMP deaminase {ECO:0000303|PubMed:15918887};^Eukaryota; Viridiplantae; Streptophyta; Embryophyta; Tracheophyta; Spermatophyta; Magnoliophyta; eudicotyledons; Gunneridae; Pentapetalae; rosids; malvids; Brassicales; Brassicaceae; Camelineae; Arabidopsis	.	TRINITY_DN76797_c0_g2_i4.p1	3-338[-]	AMPD_ARATH^AMPD_ARATH^Q:1-112,H:509-620^85.7%ID^E:2.2e-54^RecName: Full=AMP deaminase {ECO:0000303|PubMed:15918887};^Eukaryota; Viridiplantae; Streptophyta; Embryophyta; Tracheophyta; Spermatophyta; Magnoliophyta; eudicotyledons; Gunneridae; Pentapetalae; rosids; malvids; Brassicales; Brassicaceae; Camelineae; Arabidopsis	PF00962.21^A_deaminase^Adenosine/AMP deaminase^27-112^E:6e-21	.	.	COG1816^adenosine deaminase	KEGG:ath:AT2G38280`KO:K01490	GO:0005829^cellular_component^cytosol`GO:0005783^cellular_component^endoplasmic reticulum`GO:0031307^cellular_component^integral component of mitochondrial outer membrane`GO:0043231^cellular_component^intracellular membrane-bounded organelle`GO:0005634^cellular_component^nucleus`GO:0003876^molecular_function^AMP deaminase activity`GO:0005524^molecular_function^ATP binding`GO:0046872^molecular_fun…	GO:0019239^molecular_function^deaminase activity	.	.
TRINITY_DN76797_c0_g2	TRINITY_DN76797_c0_g2_i6	AMPD_ARATH^AMPD_ARATH^Q:1316-3,H:188-620^68.5%ID^E:1.4e-173^RecName: Full=AMP deaminase {ECO:0000303|PubMed:15918887};^Eukaryota; Viridiplantae; Streptophyta; Embryophyta; Tracheophyta; Spermatophyta; Magnoliophyta; eudicotyledons; Gunneridae; Pentapetalae; rosids; malvids; Brassicales; Brassicaceae; Camelineae; Arabidopsis	.	TRINITY_DN76797_c0_g2_i6.p1	3-1328[-]	AMPD_ARATH^AMPD_ARATH^Q:5-442,H:188-620^68.5%ID^E:1.4e-173^RecName: Full=AMP deaminase {ECO:0000303|PubMed:15918887};^Eukaryota; Viridiplantae; Streptophyta; Embryophyta; Tracheophyta; Spermatophyta; Magnoliophyta; eudicotyledons; Gunneridae; Pentapetalae; rosids; malvids; Brassicales; Brassicaceae; Camelineae; Arabidopsis	PF00962.21^A_deaminase^Adenosine/AMP deaminase^206-442^E:4.6e-46	.	.	COG1816^adenosine deaminase	KEGG:ath:AT2G38280`KO:K01490	GO:0005829^cellular_component^cytosol`GO:0005783^cellular_component^endoplasmic reticulum`GO:0031307^cellular_component^integral component of mitochondrial outer membrane`GO:0043231^cellular_component^intracellular membrane-bounded organelle`GO:0005634^cellular_component^nucleus`GO:0003876^molecular_function^AMP deaminase activity`GO:0005524^molecular_function^ATP binding`GO:0046872^molecular_fun…	GO:0019239^molecular_function^deaminase activity	.	.
TRINITY_DN76743_c1_g1	TRINITY_DN76743_c1_g1_i1	ATP4_IPOBA^ATP4_IPOBA^Q:1053-445,H:1-200^80.8%ID^E:4.8e-86^RecName: Full=ATP synthase subunit delta', mitochondrial;^Eukaryota; Viridiplantae; Streptophyta; Embryophyta; Tracheophyta; Spermatophyta; Magnoliophyta; eudicotyledons; Gunneridae; Pentapetalae; asterids; lamiids; Solanales; Convolvulaceae; Ipomoeeae; Ipomoea	.	TRINITY_DN76743_c1_g1_i1.p1	442-1053[-]	ATP4_IPOBA^ATP4_IPOBA^Q:1-203,H:1-200^80.8%ID^E:3.1e-86^RecName: Full=ATP synthase subunit delta', mitochondrial;^Eukaryota; Viridiplantae; Streptophyta; Embryophyta; Tracheophyta; Spermatophyta; Magnoliophyta; eudicotyledons; Gunneridae; Pentapetalae; asterids; lamiids; Solanales; Convolvulaceae; Ipomoeeae; Ipomoea	PF02823.15^ATP-synt_DE_N^ATP synthase, Delta/Epsilon chain, beta-sandwich domain^74-144^E:1e-15	.	.	.	.	GO:0005743^cellular_component^mitochondrial inner membrane`GO:0045261^cellular_component^proton-transporting ATP synthase complex, catalytic core F(1)`GO:0046933^molecular_function^proton-transporting ATP synthase activity, rotational mechanism`GO:0015986^biological_process^ATP synthesis coupled proton transport	GO:0015986^biological_process^ATP synthesis coupled proton transport	.	.
TRINITY_DN76743_c1_g1	TRINITY_DN76743_c1_g1_i3	ATP4_IPOBA^ATP4_IPOBA^Q:854-588,H:1-86^69.7%ID^E:1.2e-26^RecName: Full=ATP synthase subunit delta', mitochondrial;^Eukaryota; Viridiplantae; Streptophyta; Embryophyta; Tracheophyta; Spermatophyta; Magnoliophyta; eudicotyledons; Gunneridae; Pentapetalae; asterids; lamiids; Solanales; Convolvulaceae; Ipomoeeae; Ipomoea	.	TRINITY_DN76743_c1_g1_i3.p1	736-1041[-]	.	.	.	.	.	.	.	.	.	.
TRINITY_DN76743_c1_g1	TRINITY_DN76743_c1_g1_i2	.	.	.	.	.	.	.	.	.	.	.	.	.	.
TRINITY_DN76743_c2_g1	TRINITY_DN76743_c2_g1_i1	LEDL2_DROME^LEDL2_DROME^Q:218-586,H:42-160^34.4%ID^E:2.7e-11^RecName: Full=C-type lectin 37Da {ECO:0000305};^Eukaryota; Metazoa; Ecdysozoa; Arthropoda; Hexapoda; Insecta; Pterygota; Neoptera; Holometabola; Diptera; Brachycera; Muscomorpha; Ephydroidea; Drosophilidae; Drosophila; Sophophora	.	TRINITY_DN76743_c2_g1_i1.p1	71-622[+]	.	PF00059.20^Lectin_C^Lectin C-type domain^66-181^E:1.1e-15	sigP:1^22^0.831^YES	.	.	.	.	.	.	.
TRINITY_DN76723_c0_g1	TRINITY_DN76723_c0_g1_i4	.	.	.	.	.	.	.	.	.	.	.	.	.	.
TRINITY_DN76723_c0_g1	TRINITY_DN76723_c0_g1_i5	.	.	TRINITY_DN76723_c0_g1_i5.p1	3-323[-]	.	.	.	ExpAA=19.70^PredHel=1^Topology=o20-42i	.	.	.	.	.	.
TRINITY_DN76723_c0_g1	TRINITY_DN76723_c0_g1_i6	.	.	.	.	.	.	.	.	.	.	.	.	.	.
TRINITY_DN76723_c0_g1	TRINITY_DN76723_c0_g1_i1	.	.	.	.	.	.	.	.	.	.	.	.	.	.
TRINITY_DN76723_c0_g1	TRINITY_DN76723_c0_g1_i2	.	.	.	.	.	.	.	.	.	.	.	.	.	.
TRINITY_DN76723_c0_g1	TRINITY_DN76723_c0_g1_i3	.	.	.	.	.	.	.	.	.	.	.	.	.	.
TRINITY_DN76768_c3_g1	TRINITY_DN76768_c3_g1_i3	.	.	TRINITY_DN76768_c3_g1_i3.p1	54-773[+]	.	.	sigP:1^19^0.913^YES	ExpAA=73.54^PredHel=4^Topology=i5-22o59-76i89-111o126-148i	.	.	.	.	.	.
TRINITY_DN76768_c3_g1	TRINITY_DN76768_c3_g1_i2	.	.	TRINITY_DN76768_c3_g1_i2.p1	40-858[+]	.	.	sigP:1^16^0.854^YES	.	.	.	.	.	.	.
TRINITY_DN76768_c3_g1	TRINITY_DN76768_c3_g1_i1	.	.	TRINITY_DN76768_c3_g1_i1.p1	54-716[+]	.	.	sigP:1^19^0.913^YES	ExpAA=37.03^PredHel=2^Topology=i5-22o59-76i	.	.	.	.	.	.
TRINITY_DN76768_c3_g1	TRINITY_DN76768_c3_g1_i4	.	.	TRINITY_DN76768_c3_g1_i4.p1	54-506[+]	.	.	sigP:1^19^0.914^YES	ExpAA=70.54^PredHel=4^Topology=i5-22o59-76i89-111o126-148i	.	.	.	.	.	.
TRINITY_DN76768_c4_g1	TRINITY_DN76768_c4_g1_i14	.	.	.	.	.	.	.	.	.	.	.	.	.	.
TRINITY_DN76768_c4_g1	TRINITY_DN76768_c4_g1_i11	.	.	.	.	.	.	.	.	.	.	.	.	.	.
TRINITY_DN76768_c4_g1	TRINITY_DN76768_c4_g1_i16	.	.	.	.	.	.	.	.	.	.	.	.	.	.
TRINITY_DN76768_c4_g1	TRINITY_DN76768_c4_g1_i17	.	.	.	.	.	.	.	.	.	.	.	.	.	.
TRINITY_DN76768_c4_g1	TRINITY_DN76768_c4_g1_i21	.	.	.	.	.	.	.	.	.	.	.	.	.	.
TRINITY_DN76768_c4_g1	TRINITY_DN76768_c4_g1_i15	.	.	.	.	.	.	.	.	.	.	.	.	.	.
TRINITY_DN76768_c4_g1	TRINITY_DN76768_c4_g1_i18	.	.	TRINITY_DN76768_c4_g1_i18.p1	19-384[-]	.	.	.	.	.	.	.	.	.	.
TRINITY_DN76768_c4_g1	TRINITY_DN76768_c4_g1_i19	.	.	.	.	.	.	.	.	.	.	.	.	.	.
TRINITY_DN76768_c4_g1	TRINITY_DN76768_c4_g1_i1	.	.	.	.	.	.	.	.	.	.	.	.	.	.
TRINITY_DN76768_c4_g1	TRINITY_DN76768_c4_g1_i2	.	.	.	.	.	.	.	.	.	.	.	.	.	.
TRINITY_DN76768_c4_g1	TRINITY_DN76768_c4_g1_i3	.	.	.	.	.	.	.	.	.	.	.	.	.	.
TRINITY_DN76768_c4_g1	TRINITY_DN76768_c4_g1_i4	.	.	.	.	.	.	.	.	.	.	.	.	.	.
TRINITY_DN76768_c4_g1	TRINITY_DN76768_c4_g1_i6	.	.	.	.	.	.	.	.	.	.	.	.	.	.
TRINITY_DN76768_c4_g1	TRINITY_DN76768_c4_g1_i7	.	.	.	.	.	.	.	.	.	.	.	.	.	.
TRINITY_DN76768_c4_g1	TRINITY_DN76768_c4_g1_i22	.	.	.	.	.	.	.	.	.	.	.	.	.	.
TRINITY_DN76768_c3_g2	TRINITY_DN76768_c3_g2_i2	ABC1_ARATH^ABC1_ARATH^Q:19-189,H:6-66^54.1%ID^E:4.9e-09^RecName: Full=Protein ABC transporter 1, mitochondrial {ECO:0000303|PubMed:9852956};^Eukaryota; Viridiplantae; Streptophyta; Embryophyta; Tracheophyta; Spermatophyta; Magnoliophyta; eudicotyledons; Gunneridae; Pentapetalae; rosids; malvids; Brassicales; Brassicaceae; Camelineae; Arabidopsis	.	TRINITY_DN76768_c3_g2_i2.p1	1-447[+]	ABC1_ARATH^ABC1_ARATH^Q:7-63,H:6-66^54.1%ID^E:4.9e-09^RecName: Full=Protein ABC transporter 1, mitochondrial {ECO:0000303|PubMed:9852956};^Eukaryota; Viridiplantae; Streptophyta; Embryophyta; Tracheophyta; Spermatophyta; Magnoliophyta; eudicotyledons; Gunneridae; Pentapetalae; rosids; malvids; Brassicales; Brassicaceae; Camelineae; Arabidopsis	.	.	.	COG0661^Required, probably indirectly, for the hydroxylation of 2-octaprenylphenol to 2-octaprenyl-6-hydroxy-phenol, the fourth step in ubiquinone biosynthesis (By similarity)	KEGG:ath:AT4G01660`KO:K08869	GO:0005743^cellular_component^mitochondrial inner membrane`GO:0005739^cellular_component^mitochondrion`GO:0005524^molecular_function^ATP binding`GO:0016740^molecular_function^transferase activity`GO:0005215^molecular_function^transporter activity`GO:0015996^biological_process^chlorophyll catabolic process`GO:0010224^biological_process^response to UV-B`GO:0006744^biological_process^ubiquinone bios…	.	.	.
TRINITY_DN76768_c3_g2	TRINITY_DN76768_c3_g2_i1	.	.	TRINITY_DN76768_c3_g2_i1.p1	1-339[+]	.	.	.	.	.	.	.	.	.	.
TRINITY_DN76768_c2_g1	TRINITY_DN76768_c2_g1_i1	URH2_ARATH^URH2_ARATH^Q:174-851,H:6-225^35.6%ID^E:1.6e-27^RecName: Full=Probable uridine nucleosidase 2;^Eukaryota; Viridiplantae; Streptophyta; Embryophyta; Tracheophyta; Spermatophyta; Magnoliophyta; eudicotyledons; Gunneridae; Pentapetalae; rosids; malvids; Brassicales; Brassicaceae; Camelineae; Arabidopsis	.	TRINITY_DN76768_c2_g1_i1.p1	75-1106[+]	URH2_ARATH^URH2_ARATH^Q:34-259,H:6-225^35.6%ID^E:1.1e-27^RecName: Full=Probable uridine nucleosidase 2;^Eukaryota; Viridiplantae; Streptophyta; Embryophyta; Tracheophyta; Spermatophyta; Magnoliophyta; eudicotyledons; Gunneridae; Pentapetalae; rosids; malvids; Brassicales; Brassicaceae; Camelineae; Arabidopsis	PF01156.18^IU_nuc_hydro^Inosine-uridine preferring nucleoside hydrolase^35-334^E:1.1e-58	sigP:1^22^0.658^YES	.	COG1957^nucleoside hydrolase	KEGG:ath:AT1G05620	GO:0005829^cellular_component^cytosol`GO:0047724^molecular_function^inosine nucleosidase activity`GO:0035251^molecular_function^UDP-glucosyltransferase activity`GO:0045437^molecular_function^uridine nucleosidase activity`GO:0006148^biological_process^inosine catabolic process`GO:0010150^biological_process^leaf senescence	.	.	.
TRINITY_DN76717_c0_g1	TRINITY_DN76717_c0_g1_i4	.	.	TRINITY_DN76717_c0_g1_i4.p1	2-448[-]	.	.	.	.	.	.	.	.	.	.
TRINITY_DN76717_c0_g1	TRINITY_DN76717_c0_g1_i5	.	.	TRINITY_DN76717_c0_g1_i5.p1	148-672[-]	.	.	.	.	.	.	.	.	.	.
TRINITY_DN76717_c0_g1	TRINITY_DN76717_c0_g1_i7	.	.	.	.	.	.	.	.	.	.	.	.	.	.
TRINITY_DN76717_c0_g1	TRINITY_DN76717_c0_g1_i1	.	.	TRINITY_DN76717_c0_g1_i1.p1	174-884[-]	.	.	.	.	.	.	.	.	.	.
TRINITY_DN76717_c0_g1	TRINITY_DN76717_c0_g1_i2	.	.	.	.	.	.	.	.	.	.	.	.	.	.
TRINITY_DN76717_c0_g1	TRINITY_DN76717_c0_g1_i8	.	.	TRINITY_DN76717_c0_g1_i8.p1	98-478[-]	.	.	.	.	.	.	.	.	.	.
TRINITY_DN76717_c0_g1	TRINITY_DN76717_c0_g1_i9	.	.	TRINITY_DN76717_c0_g1_i9.p1	147-485[-]	.	.	.	.	.	.	.	.	.	.
TRINITY_DN76717_c0_g1	TRINITY_DN76717_c0_g1_i11	.	.	TRINITY_DN76717_c0_g1_i11.p1	81-701[-]	.	.	.	.	.	.	.	.	.	.
TRINITY_DN76717_c0_g2	TRINITY_DN76717_c0_g2_i9	.	.	TRINITY_DN76717_c0_g2_i9.p2	165-479[-]	.	.	.	.	.	.	.	.	.	.
TRINITY_DN76717_c0_g2	TRINITY_DN76717_c0_g2_i8	.	.	.	.	.	.	.	.	.	.	.	.	.	.
TRINITY_DN76717_c0_g2	TRINITY_DN76717_c0_g2_i1	.	.	.	.	.	.	.	.	.	.	.	.	.	.
TRINITY_DN76717_c0_g2	TRINITY_DN76717_c0_g2_i2	.	.	.	.	.	.	.	.	.	.	.	.	.	.
TRINITY_DN76717_c0_g2	TRINITY_DN76717_c0_g2_i5	.	.	TRINITY_DN76717_c0_g2_i5.p2	212-526[-]	.	.	.	.	.	.	.	.	.	.
TRINITY_DN76717_c0_g2	TRINITY_DN76717_c0_g2_i7	.	.	.	.	.	.	.	.	.	.	.	.	.	.
TRINITY_DN76748_c2_g2	TRINITY_DN76748_c2_g2_i3	GGPPS_HEVBR^GGPPS_HEVBR^Q:282-512,H:230-370^40.4%ID^E:9.6e-16^RecName: Full=Geranylgeranyl pyrophosphate synthase, chloroplastic;^Eukaryota; Viridiplantae; Streptophyta; Embryophyta; Tracheophyta; Spermatophyta; Magnoliophyta; eudicotyledons; Gunneridae; Pentapetalae; rosids; fabids; Malpighiales; Euphorbiaceae; Crotonoideae; Micrandreae; Hevea`GGPPS_HEVBR^GGPPS_HEVBR^Q:167-301,H:185-229^71.1%ID^…	.	.	.	.	.	.	.	.	.	GO:0009507^cellular_component^chloroplast`GO:0004161^molecular_function^dimethylallyltranstransferase activity`GO:0004311^molecular_function^farnesyltranstransferase activity`GO:0004337^molecular_function^geranyltranstransferase activity`GO:0046872^molecular_function^metal ion binding`GO:0016117^biological_process^carotenoid biosynthetic process`GO:0045337^biological_process^farnesyl diphosphate …	.	.	.
TRINITY_DN76748_c2_g2	TRINITY_DN76748_c2_g2_i2	GGPPS_HEVBR^GGPPS_HEVBR^Q:605-1711,H:1-370^73.1%ID^E:4.6e-145^RecName: Full=Geranylgeranyl pyrophosphate synthase, chloroplastic;^Eukaryota; Viridiplantae; Streptophyta; Embryophyta; Tracheophyta; Spermatophyta; Magnoliophyta; eudicotyledons; Gunneridae; Pentapetalae; rosids; fabids; Malpighiales; Euphorbiaceae; Crotonoideae; Micrandreae; Hevea	.	TRINITY_DN76748_c2_g2_i2.p1	605-1714[+]	GGPPS_HEVBR^GGPPS_HEVBR^Q:1-369,H:1-370^73.1%ID^E:2.4e-145^RecName: Full=Geranylgeranyl pyrophosphate synthase, chloroplastic;^Eukaryota; Viridiplantae; Streptophyta; Embryophyta; Tracheophyta; Spermatophyta; Magnoliophyta; eudicotyledons; Gunneridae; Pentapetalae; rosids; fabids; Malpighiales; Euphorbiaceae; Crotonoideae; Micrandreae; Hevea	PF00348.16^polyprenyl_synt^Polyprenyl synthetase^103-341^E:8.2e-58	.	.	.	.	GO:0009507^cellular_component^chloroplast`GO:0004161^molecular_function^dimethylallyltranstransferase activity`GO:0004311^molecular_function^farnesyltranstransferase activity`GO:0004337^molecular_function^geranyltranstransferase activity`GO:0046872^molecular_function^metal ion binding`GO:0016117^biological_process^carotenoid biosynthetic process`GO:0045337^biological_process^farnesyl diphosphate …	GO:0008299^biological_process^isoprenoid biosynthetic process	.	.
TRINITY_DN76748_c2_g2	TRINITY_DN76748_c2_g2_i1	GGPPS_HEVBR^GGPPS_HEVBR^Q:285-452,H:181-236^67.9%ID^E:7.5e-14^RecName: Full=Geranylgeranyl pyrophosphate synthase, chloroplastic;^Eukaryota; Viridiplantae; Streptophyta; Embryophyta; Tracheophyta; Spermatophyta; Magnoliophyta; eudicotyledons; Gunneridae; Pentapetalae; rosids; fabids; Malpighiales; Euphorbiaceae; Crotonoideae; Micrandreae; Hevea	.	TRINITY_DN76748_c2_g2_i1.p1	170-499[-]	.	.	.	.	.	.	.	.	.	.
TRINITY_DN76748_c2_g2	TRINITY_DN76748_c2_g2_i7	GGPPS_HEVBR^GGPPS_HEVBR^Q:605-1711,H:1-370^73.1%ID^E:4.7e-145^RecName: Full=Geranylgeranyl pyrophosphate synthase, chloroplastic;^Eukaryota; Viridiplantae; Streptophyta; Embryophyta; Tracheophyta; Spermatophyta; Magnoliophyta; eudicotyledons; Gunneridae; Pentapetalae; rosids; fabids; Malpighiales; Euphorbiaceae; Crotonoideae; Micrandreae; Hevea	.	TRINITY_DN76748_c2_g2_i7.p1	605-1714[+]	GGPPS_HEVBR^GGPPS_HEVBR^Q:1-369,H:1-370^73.1%ID^E:2.4e-145^RecName: Full=Geranylgeranyl pyrophosphate synthase, chloroplastic;^Eukaryota; Viridiplantae; Streptophyta; Embryophyta; Tracheophyta; Spermatophyta; Magnoliophyta; eudicotyledons; Gunneridae; Pentapetalae; rosids; fabids; Malpighiales; Euphorbiaceae; Crotonoideae; Micrandreae; Hevea	PF00348.16^polyprenyl_synt^Polyprenyl synthetase^103-341^E:8.2e-58	.	.	.	.	GO:0009507^cellular_component^chloroplast`GO:0004161^molecular_function^dimethylallyltranstransferase activity`GO:0004311^molecular_function^farnesyltranstransferase activity`GO:0004337^molecular_function^geranyltranstransferase activity`GO:0046872^molecular_function^metal ion binding`GO:0016117^biological_process^carotenoid biosynthetic process`GO:0045337^biological_process^farnesyl diphosphate …	GO:0008299^biological_process^isoprenoid biosynthetic process	.	.
TRINITY_DN76748_c2_g2	TRINITY_DN76748_c2_g2_i5	GGPPS_CATRO^GGPPS_CATRO^Q:445-798,H:219-336^74.6%ID^E:1.2e-44^RecName: Full=Geranylgeranyl pyrophosphate synthase, chloroplastic;^Eukaryota; Viridiplantae; Streptophyta; Embryophyta; Tracheophyta; Spermatophyta; Magnoliophyta; eudicotyledons; Gunneridae; Pentapetalae; asterids; lamiids; Gentianales; Apocynaceae; Rauvolfioideae; Vinceae; Catharanthinae; Catharanthus`GGPPS_CATRO^GGPPS_CATRO^Q:285-4…	.	TRINITY_DN76748_c2_g2_i5.p2	358-813[+]	GGPPS_CATRO^GGPPS_CATRO^Q:30-147,H:219-336^74.6%ID^E:7.4e-45^RecName: Full=Geranylgeranyl pyrophosphate synthase, chloroplastic;^Eukaryota; Viridiplantae; Streptophyta; Embryophyta; Tracheophyta; Spermatophyta; Magnoliophyta; eudicotyledons; Gunneridae; Pentapetalae; asterids; lamiids; Gentianales; Apocynaceae; Rauvolfioideae; Vinceae; Catharanthinae; Catharanthus	PF00348.16^polyprenyl_synt^Polyprenyl synthetase^36-142^E:3.1e-23	.	.	.	.	GO:0009507^cellular_component^chloroplast`GO:0004161^molecular_function^dimethylallyltranstransferase activity`GO:0004311^molecular_function^farnesyltranstransferase activity`GO:0004337^molecular_function^geranyltranstransferase activity`GO:0046872^molecular_function^metal ion binding`GO:0016117^biological_process^carotenoid biosynthetic process`GO:0045337^biological_process^farnesyl diphosphate …	GO:0008299^biological_process^isoprenoid biosynthetic process	.	.
TRINITY_DN76748_c2_g2	TRINITY_DN76748_c2_g2_i9	GGPPS_CATRO^GGPPS_CATRO^Q:163-462,H:168-267^69%ID^E:1.7e-33^RecName: Full=Geranylgeranyl pyrophosphate synthase, chloroplastic;^Eukaryota; Viridiplantae; Streptophyta; Embryophyta; Tracheophyta; Spermatophyta; Magnoliophyta; eudicotyledons; Gunneridae; Pentapetalae; asterids; lamiids; Gentianales; Apocynaceae; Rauvolfioideae; Vinceae; Catharanthinae; Catharanthus	.	TRINITY_DN76748_c2_g2_i9.p1	121-483[+]	GGPPS_CATRO^GGPPS_CATRO^Q:15-114,H:168-267^69%ID^E:6.2e-34^RecName: Full=Geranylgeranyl pyrophosphate synthase, chloroplastic;^Eukaryota; Viridiplantae; Streptophyta; Embryophyta; Tracheophyta; Spermatophyta; Magnoliophyta; eudicotyledons; Gunneridae; Pentapetalae; asterids; lamiids; Gentianales; Apocynaceae; Rauvolfioideae; Vinceae; Catharanthinae; Catharanthus	PF00348.16^polyprenyl_synt^Polyprenyl synthetase^13-114^E:2.7e-08	.	.	.	.	GO:0009507^cellular_component^chloroplast`GO:0004161^molecular_function^dimethylallyltranstransferase activity`GO:0004311^molecular_function^farnesyltranstransferase activity`GO:0004337^molecular_function^geranyltranstransferase activity`GO:0046872^molecular_function^metal ion binding`GO:0016117^biological_process^carotenoid biosynthetic process`GO:0045337^biological_process^farnesyl diphosphate …	GO:0008299^biological_process^isoprenoid biosynthetic process	.	.
TRINITY_DN76748_c2_g2	TRINITY_DN76748_c2_g2_i8	GGPPS_HEVBR^GGPPS_HEVBR^Q:605-1711,H:1-370^73.1%ID^E:3.6e-145^RecName: Full=Geranylgeranyl pyrophosphate synthase, chloroplastic;^Eukaryota; Viridiplantae; Streptophyta; Embryophyta; Tracheophyta; Spermatophyta; Magnoliophyta; eudicotyledons; Gunneridae; Pentapetalae; rosids; fabids; Malpighiales; Euphorbiaceae; Crotonoideae; Micrandreae; Hevea	.	TRINITY_DN76748_c2_g2_i8.p1	605-1714[+]	GGPPS_HEVBR^GGPPS_HEVBR^Q:1-369,H:1-370^73.1%ID^E:2.4e-145^RecName: Full=Geranylgeranyl pyrophosphate synthase, chloroplastic;^Eukaryota; Viridiplantae; Streptophyta; Embryophyta; Tracheophyta; Spermatophyta; Magnoliophyta; eudicotyledons; Gunneridae; Pentapetalae; rosids; fabids; Malpighiales; Euphorbiaceae; Crotonoideae; Micrandreae; Hevea	PF00348.16^polyprenyl_synt^Polyprenyl synthetase^103-341^E:8.2e-58	.	.	.	.	GO:0009507^cellular_component^chloroplast`GO:0004161^molecular_function^dimethylallyltranstransferase activity`GO:0004311^molecular_function^farnesyltranstransferase activity`GO:0004337^molecular_function^geranyltranstransferase activity`GO:0046872^molecular_function^metal ion binding`GO:0016117^biological_process^carotenoid biosynthetic process`GO:0045337^biological_process^farnesyl diphosphate …	GO:0008299^biological_process^isoprenoid biosynthetic process	.	.
TRINITY_DN76748_c1_g1	TRINITY_DN76748_c1_g1_i1	.	.	TRINITY_DN76748_c1_g1_i1.p1	3-455[-]	.	PF00931.21^NB-ARC^NB-ARC domain^106-149^E:7.6e-10	.	.	.	.	.	GO:0043531^molecular_function^ADP binding	.	.
TRINITY_DN76748_c1_g1	TRINITY_DN76748_c1_g1_i2	.	.	.	.	.	.	.	.	.	.	.	.	.	.
TRINITY_DN76786_c1_g3	TRINITY_DN76786_c1_g3_i3	TMVRN_NICGU^TMVRN_NICGU^Q:1361-531,H:635-894^27.5%ID^E:2.8e-10^RecName: Full=TMV resistance protein N;^Eukaryota; Viridiplantae; Streptophyta; Embryophyta; Tracheophyta; Spermatophyta; Magnoliophyta; eudicotyledons; Gunneridae; Pentapetalae; asterids; lamiids; Solanales; Solanaceae; Nicotianoideae; Nicotianeae; Nicotiana`TMVRN_NICGU^TMVRN_NICGU^Q:535-140,H:749-883^32.6%ID^E:1.3e-07^RecName: Full=…	.	TRINITY_DN76786_c1_g3_i3.p1	1050-1373[-]	.	.	.	.	.	.	.	.	.	.
TRINITY_DN76786_c1_g3	TRINITY_DN76786_c1_g3_i2	WR52N_ARATH^WR52N_ARATH^Q:594-196,H:517-661^31.5%ID^E:2.3e-12^RecName: Full=Disease resistance protein RRS1 {ECO:0000303|PubMed:11842188};^Eukaryota; Viridiplantae; Streptophyta; Embryophyta; Tracheophyta; Spermatophyta; Magnoliophyta; eudicotyledons; Gunneridae; Pentapetalae; rosids; malvids; Brassicales; Brassicaceae; Camelineae; Arabidopsis	.	TRINITY_DN76786_c1_g3_i2.p1	1-807[-]	WR52N_ARATH^WR52N_ARATH^Q:72-204,H:517-661^31.5%ID^E:2.3e-12^RecName: Full=Disease resistance protein RRS1 {ECO:0000303|PubMed:11842188};^Eukaryota; Viridiplantae; Streptophyta; Embryophyta; Tracheophyta; Spermatophyta; Magnoliophyta; eudicotyledons; Gunneridae; Pentapetalae; rosids; malvids; Brassicales; Brassicaceae; Camelineae; Arabidopsis	.	.	.	ENOG410ZRAD^Transcription factor. Interacts specifically with the W box (5'-(T)TGAC CT -3'), a frequently occurring elicitor- responsive cis-acting element	.	GO:0005737^cellular_component^cytoplasm`GO:0005634^cellular_component^nucleus`GO:0043531^molecular_function^ADP binding`GO:0005524^molecular_function^ATP binding`GO:0003700^molecular_function^DNA-binding transcription factor activity`GO:0043565^molecular_function^sequence-specific DNA binding`GO:0006952^biological_process^defense response`GO:0006351^biological_process^transcription, DNA-templated	.	.	.
TRINITY_DN76786_c1_g3	TRINITY_DN76786_c1_g3_i1	TMVRN_NICGU^TMVRN_NICGU^Q:424-188,H:741-819^39.2%ID^E:6.3e-06^RecName: Full=TMV resistance protein N;^Eukaryota; Viridiplantae; Streptophyta; Embryophyta; Tracheophyta; Spermatophyta; Magnoliophyta; eudicotyledons; Gunneridae; Pentapetalae; asterids; lamiids; Solanales; Solanaceae; Nicotianoideae; Nicotianeae; Nicotiana	.	TRINITY_DN76786_c1_g3_i1.p2	3-425[+]	.	.	.	.	.	.	.	.	.	.
TRINITY_DN76786_c1_g3	TRINITY_DN76786_c1_g3_i7	.	.	.	.	.	.	.	.	.	.	.	.	.	.
TRINITY_DN76786_c1_g3	TRINITY_DN76786_c1_g3_i12	SNC1_ARATH^SNC1_ARATH^Q:528-193,H:574-686^41.6%ID^E:4.6e-14^RecName: Full=Protein SUPPRESSOR OF npr1-1, CONSTITUTIVE 1 {ECO:0000303|PubMed:14576290};^Eukaryota; Viridiplantae; Streptophyta; Embryophyta; Tracheophyta; Spermatophyta; Magnoliophyta; eudicotyledons; Gunneridae; Pentapetalae; rosids; malvids; Brassicales; Brassicaceae; Camelineae; Arabidopsis	.	TRINITY_DN76786_c1_g3_i12.p1	1-531[-]	.	.	.	.	.	.	.	.	.	.
TRINITY_DN76786_c1_g3	TRINITY_DN76786_c1_g3_i5	TMVRN_NICGU^TMVRN_NICGU^Q:654-310,H:635-749^36.2%ID^E:7.9e-11^RecName: Full=TMV resistance protein N;^Eukaryota; Viridiplantae; Streptophyta; Embryophyta; Tracheophyta; Spermatophyta; Magnoliophyta; eudicotyledons; Gunneridae; Pentapetalae; asterids; lamiids; Solanales; Solanaceae; Nicotianoideae; Nicotianeae; Nicotiana	.	TRINITY_DN76786_c1_g3_i5.p1	1-666[-]	.	.	.	.	.	.	.	.	.	.
TRINITY_DN76786_c1_g3	TRINITY_DN76786_c1_g3_i10	TMVRN_NICGU^TMVRN_NICGU^Q:369-136,H:721-803^42.2%ID^E:1e-06^RecName: Full=TMV resistance protein N;^Eukaryota; Viridiplantae; Streptophyta; Embryophyta; Tracheophyta; Spermatophyta; Magnoliophyta; eudicotyledons; Gunneridae; Pentapetalae; asterids; lamiids; Solanales; Solanaceae; Nicotianoideae; Nicotianeae; Nicotiana	.	TRINITY_DN76786_c1_g3_i10.p2	570-980[-]	.	.	.	.	.	.	.	.	.	.
TRINITY_DN76786_c1_g3	TRINITY_DN76786_c1_g3_i9	TMVRN_NICGU^TMVRN_NICGU^Q:339-46,H:635-731^36.7%ID^E:1e-09^RecName: Full=TMV resistance protein N;^Eukaryota; Viridiplantae; Streptophyta; Embryophyta; Tracheophyta; Spermatophyta; Magnoliophyta; eudicotyledons; Gunneridae; Pentapetalae; asterids; lamiids; Solanales; Solanaceae; Nicotianoideae; Nicotianeae; Nicotiana	.	TRINITY_DN76786_c1_g3_i9.p1	1-351[-]	.	.	.	.	.	.	.	.	.	.
TRINITY_DN76786_c1_g3	TRINITY_DN76786_c1_g3_i8	.	.	TRINITY_DN76786_c1_g3_i8.p1	2-367[-]	.	.	.	.	.	.	.	.	.	.
TRINITY_DN76786_c1_g3	TRINITY_DN76786_c1_g3_i11	TMVRN_NICGU^TMVRN_NICGU^Q:1169-453,H:635-845^26.8%ID^E:1.5e-09^RecName: Full=TMV resistance protein N;^Eukaryota; Viridiplantae; Streptophyta; Embryophyta; Tracheophyta; Spermatophyta; Magnoliophyta; eudicotyledons; Gunneridae; Pentapetalae; asterids; lamiids; Solanales; Solanaceae; Nicotianoideae; Nicotianeae; Nicotiana`TMVRN_NICGU^TMVRN_NICGU^Q:535-140,H:749-883^32.6%ID^E:1.1e-07^RecName: Full=…	.	TRINITY_DN76786_c1_g3_i11.p1	858-1181[-]	.	.	.	.	.	.	.	.	.	.
TRINITY_DN76786_c1_g3	TRINITY_DN76786_c1_g3_i4	.	.	TRINITY_DN76786_c1_g3_i4.p1	1-327[+]	.	.	.	.	.	.	.	.	.	.
TRINITY_DN76786_c1_g3	TRINITY_DN76786_c1_g3_i6	.	.	TRINITY_DN76786_c1_g3_i6.p1	3-323[+]	.	.	.	.	.	.	.	.	.	.
TRINITY_DN76786_c1_g2	TRINITY_DN76786_c1_g2_i1	.	.	TRINITY_DN76786_c1_g2_i1.p1	2-520[-]	.	.	.	.	.	.	.	.	.	.
TRINITY_DN76786_c1_g1	TRINITY_DN76786_c1_g1_i1	.	.	TRINITY_DN76786_c1_g1_i1.p1	1-336[-]	.	PF00560.32^LRR_1^Leucine Rich Repeat^36-57^E:0.39	.	.	.	.	.	GO:0005515^molecular_function^protein binding	.	.
TRINITY_DN76786_c1_g1	TRINITY_DN76786_c1_g1_i2	.	.	TRINITY_DN76786_c1_g1_i2.p1	1-444[-]	.	PF00560.32^LRR_1^Leucine Rich Repeat^72-93^E:0.61	.	.	.	.	.	GO:0005515^molecular_function^protein binding	.	.
TRINITY_DN76786_c1_g5	TRINITY_DN76786_c1_g5_i1	TMVRN_NICGU^TMVRN_NICGU^Q:616-266,H:616-731^39.3%ID^E:2.5e-14^RecName: Full=TMV resistance protein N;^Eukaryota; Viridiplantae; Streptophyta; Embryophyta; Tracheophyta; Spermatophyta; Magnoliophyta; eudicotyledons; Gunneridae; Pentapetalae; asterids; lamiids; Solanales; Solanaceae; Nicotianoideae; Nicotianeae; Nicotiana	.	TRINITY_DN76786_c1_g5_i1.p1	2-643[-]	RPS4B_ARATH^RPS4B_ARATH^Q:1-137,H:648-780^31.7%ID^E:6.6e-07^RecName: Full=Disease resistance protein RPS4B {ECO:0000303|PubMed:25744164};^Eukaryota; Viridiplantae; Streptophyta; Embryophyta; Tracheophyta; Spermatophyta; Magnoliophyta; eudicotyledons; Gunneridae; Pentapetalae; rosids; malvids; Brassicales; Brassicaceae; Camelineae; Arabidopsis	.	.	.	.	KEGG:ath:AT5G45060	GO:0005634^cellular_component^nucleus`GO:0043531^molecular_function^ADP binding`GO:0005524^molecular_function^ATP binding`GO:0009870^biological_process^defense response signaling pathway, resistance gene-dependent`GO:0042742^biological_process^defense response to bacterium	.	.	.
TRINITY_DN76786_c1_g5	TRINITY_DN76786_c1_g5_i3	.	.	TRINITY_DN76786_c1_g5_i3.p1	2-565[-]	.	PF00560.32^LRR_1^Leucine Rich Repeat^162-181^E:1	.	.	.	.	.	GO:0005515^molecular_function^protein binding	.	.
TRINITY_DN76786_c1_g5	TRINITY_DN76786_c1_g5_i2	TMVRN_NICGU^TMVRN_NICGU^Q:520-170,H:616-731^40.2%ID^E:9.7e-15^RecName: Full=TMV resistance protein N;^Eukaryota; Viridiplantae; Streptophyta; Embryophyta; Tracheophyta; Spermatophyta; Magnoliophyta; eudicotyledons; Gunneridae; Pentapetalae; asterids; lamiids; Solanales; Solanaceae; Nicotianoideae; Nicotianeae; Nicotiana	.	TRINITY_DN76786_c1_g5_i2.p1	2-547[-]	RPS4B_ARATH^RPS4B_ARATH^Q:1-123,H:648-811^27.7%ID^E:1.1e-07^RecName: Full=Disease resistance protein RPS4B {ECO:0000303|PubMed:25744164};^Eukaryota; Viridiplantae; Streptophyta; Embryophyta; Tracheophyta; Spermatophyta; Magnoliophyta; eudicotyledons; Gunneridae; Pentapetalae; rosids; malvids; Brassicales; Brassicaceae; Camelineae; Arabidopsis	PF00560.32^LRR_1^Leucine Rich Repeat^156-175^E:0.98	.	.	.	KEGG:ath:AT5G45060	GO:0005634^cellular_component^nucleus`GO:0043531^molecular_function^ADP binding`GO:0005524^molecular_function^ATP binding`GO:0009870^biological_process^defense response signaling pathway, resistance gene-dependent`GO:0042742^biological_process^defense response to bacterium	GO:0005515^molecular_function^protein binding	.	.
TRINITY_DN76786_c1_g4	TRINITY_DN76786_c1_g4_i1	.	.	TRINITY_DN76786_c1_g4_i1.p2	3-509[-]	.	PF00560.32^LRR_1^Leucine Rich Repeat^7-28^E:0.39	.	.	.	.	.	GO:0005515^molecular_function^protein binding	.	.
TRINITY_DN76708_c0_g2	TRINITY_DN76708_c0_g2_i21	ULP2B_ARATH^ULP2B_ARATH^Q:639-7,H:322-551^62.6%ID^E:1.6e-83^RecName: Full=Probable ubiquitin-like-specific protease 2B;^Eukaryota; Viridiplantae; Streptophyta; Embryophyta; Tracheophyta; Spermatophyta; Magnoliophyta; eudicotyledons; Gunneridae; Pentapetalae; rosids; malvids; Brassicales; Brassicaceae; Camelineae; Arabidopsis	.	TRINITY_DN76708_c0_g2_i21.p1	1-552[-]	ULP2B_ARATH^ULP2B_ARATH^Q:8-182,H:377-551^75.4%ID^E:4.7e-78^RecName: Full=Probable ubiquitin-like-specific protease 2B;^Eukaryota; Viridiplantae; Streptophyta; Embryophyta; Tracheophyta; Spermatophyta; Magnoliophyta; eudicotyledons; Gunneridae; Pentapetalae; rosids; malvids; Brassicales; Brassicaceae; Camelineae; Arabidopsis	PF02902.18^Peptidase_C48^Ulp1 protease family, C-terminal catalytic domain^40-177^E:4.8e-26	.	.	COG5160^SUMO1 sentrin specific peptidase	KEGG:ath:AT1G09730`KO:K08596	GO:0070139^molecular_function^SUMO-specific endopeptidase activity`GO:0016926^biological_process^protein desumoylation	GO:0008234^molecular_function^cysteine-type peptidase activity`GO:0006508^biological_process^proteolysis	.	.
TRINITY_DN76708_c0_g2	TRINITY_DN76708_c0_g2_i22	ULP2A_ARATH^ULP2A_ARATH^Q:666-235,H:197-334^51%ID^E:6.5e-31^RecName: Full=Probable ubiquitin-like-specific protease 2A;^Eukaryota; Viridiplantae; Streptophyta; Embryophyta; Tracheophyta; Spermatophyta; Magnoliophyta; eudicotyledons; Gunneridae; Pentapetalae; rosids; malvids; Brassicales; Brassicaceae; Camelineae; Arabidopsis	.	.	.	.	.	.	.	COG5160^SUMO1 sentrin specific peptidase	KEGG:ath:AT4G33620`KO:K08596	GO:0070139^molecular_function^SUMO-specific endopeptidase activity`GO:0016926^biological_process^protein desumoylation	.	.	.
TRINITY_DN76708_c0_g2	TRINITY_DN76708_c0_g2_i24	ULP2A_ARATH^ULP2A_ARATH^Q:318-115,H:167-234^48.5%ID^E:7.1e-10^RecName: Full=Probable ubiquitin-like-specific protease 2A;^Eukaryota; Viridiplantae; Streptophyta; Embryophyta; Tracheophyta; Spermatophyta; Magnoliophyta; eudicotyledons; Gunneridae; Pentapetalae; rosids; malvids; Brassicales; Brassicaceae; Camelineae; Arabidopsis	.	.	.	.	.	.	.	COG5160^SUMO1 sentrin specific peptidase	KEGG:ath:AT4G33620`KO:K08596	GO:0070139^molecular_function^SUMO-specific endopeptidase activity`GO:0016926^biological_process^protein desumoylation	.	.	.
TRINITY_DN76708_c0_g2	TRINITY_DN76708_c0_g2_i18	ULP2B_ARATH^ULP2B_ARATH^Q:510-235,H:338-423^53.3%ID^E:2.1e-19^RecName: Full=Probable ubiquitin-like-specific protease 2B;^Eukaryota; Viridiplantae; Streptophyta; Embryophyta; Tracheophyta; Spermatophyta; Magnoliophyta; eudicotyledons; Gunneridae; Pentapetalae; rosids; malvids; Brassicales; Brassicaceae; Camelineae; Arabidopsis	.	.	.	.	.	.	.	COG5160^SUMO1 sentrin specific peptidase	KEGG:ath:AT1G09730`KO:K08596	GO:0070139^molecular_function^SUMO-specific endopeptidase activity`GO:0016926^biological_process^protein desumoylation	.	.	.
TRINITY_DN76708_c0_g2	TRINITY_DN76708_c0_g2_i11	ULP2B_ARATH^ULP2B_ARATH^Q:378-235,H:376-423^77.1%ID^E:1.2e-14^RecName: Full=Probable ubiquitin-like-specific protease 2B;^Eukaryota; Viridiplantae; Streptophyta; Embryophyta; Tracheophyta; Spermatophyta; Magnoliophyta; eudicotyledons; Gunneridae; Pentapetalae; rosids; malvids; Brassicales; Brassicaceae; Camelineae; Arabidopsis	.	.	.	.	.	.	.	COG5160^SUMO1 sentrin specific peptidase	KEGG:ath:AT1G09730`KO:K08596	GO:0070139^molecular_function^SUMO-specific endopeptidase activity`GO:0016926^biological_process^protein desumoylation	.	.	.
TRINITY_DN76708_c0_g2	TRINITY_DN76708_c0_g2_i13	ULP2A_ARATH^ULP2A_ARATH^Q:557-132,H:197-332^51%ID^E:2.5e-31^RecName: Full=Probable ubiquitin-like-specific protease 2A;^Eukaryota; Viridiplantae; Streptophyta; Embryophyta; Tracheophyta; Spermatophyta; Magnoliophyta; eudicotyledons; Gunneridae; Pentapetalae; rosids; malvids; Brassicales; Brassicaceae; Camelineae; Arabidopsis	.	.	.	.	.	.	.	COG5160^SUMO1 sentrin specific peptidase	KEGG:ath:AT4G33620`KO:K08596	GO:0070139^molecular_function^SUMO-specific endopeptidase activity`GO:0016926^biological_process^protein desumoylation	.	.	.
TRINITY_DN76708_c0_g2	TRINITY_DN76708_c0_g2_i15	ULP2A_ARATH^ULP2A_ARATH^Q:1011-10,H:167-459^43.6%ID^E:1e-70^RecName: Full=Probable ubiquitin-like-specific protease 2A;^Eukaryota; Viridiplantae; Streptophyta; Embryophyta; Tracheophyta; Spermatophyta; Magnoliophyta; eudicotyledons; Gunneridae; Pentapetalae; rosids; malvids; Brassicales; Brassicaceae; Camelineae; Arabidopsis	.	TRINITY_DN76708_c0_g2_i15.p1	295-1011[-]	ULP2A_ARATH^ULP2A_ARATH^Q:1-212,H:167-396^52.6%ID^E:3.9e-64^RecName: Full=Probable ubiquitin-like-specific protease 2A;^Eukaryota; Viridiplantae; Streptophyta; Embryophyta; Tracheophyta; Spermatophyta; Magnoliophyta; eudicotyledons; Gunneridae; Pentapetalae; rosids; malvids; Brassicales; Brassicaceae; Camelineae; Arabidopsis	PF02902.18^Peptidase_C48^Ulp1 protease family, C-terminal catalytic domain^136-213^E:1.3e-15	.	.	COG5160^SUMO1 sentrin specific peptidase	KEGG:ath:AT4G33620`KO:K08596	GO:0070139^molecular_function^SUMO-specific endopeptidase activity`GO:0016926^biological_process^protein desumoylation	GO:0008234^molecular_function^cysteine-type peptidase activity`GO:0006508^biological_process^proteolysis	.	.
TRINITY_DN76708_c0_g2	TRINITY_DN76708_c0_g2_i14	ULP2A_ARATH^ULP2A_ARATH^Q:842-300,H:197-396^52.5%ID^E:3.9e-54^RecName: Full=Probable ubiquitin-like-specific protease 2A;^Eukaryota; Viridiplantae; Streptophyta; Embryophyta; Tracheophyta; Spermatophyta; Magnoliophyta; eudicotyledons; Gunneridae; Pentapetalae; rosids; malvids; Brassicales; Brassicaceae; Camelineae; Arabidopsis`ULP2A_ARATH^ULP2A_ARATH^Q:201-10,H:398-459^53.8%ID^E:2e-13^RecName: Fu…	.	TRINITY_DN76708_c0_g2_i14.p1	219-647[-]	ULP2B_ARATH^ULP2B_ARATH^Q:8-117,H:377-486^78.2%ID^E:2e-47^RecName: Full=Probable ubiquitin-like-specific protease 2B;^Eukaryota; Viridiplantae; Streptophyta; Embryophyta; Tracheophyta; Spermatophyta; Magnoliophyta; eudicotyledons; Gunneridae; Pentapetalae; rosids; malvids; Brassicales; Brassicaceae; Camelineae; Arabidopsis	PF02902.18^Peptidase_C48^Ulp1 protease family, C-terminal catalytic domain^40-117^E:3.9e-16	.	.	COG5160^SUMO1 sentrin specific peptidase	KEGG:ath:AT1G09730`KO:K08596	GO:0070139^molecular_function^SUMO-specific endopeptidase activity`GO:0016926^biological_process^protein desumoylation	GO:0008234^molecular_function^cysteine-type peptidase activity`GO:0006508^biological_process^proteolysis	.	.
TRINITY_DN76708_c0_g2	TRINITY_DN76708_c0_g2_i17	ULP2A_ARATH^ULP2A_ARATH^Q:1010-300,H:167-396^54%ID^E:1.2e-66^RecName: Full=Probable ubiquitin-like-specific protease 2A;^Eukaryota; Viridiplantae; Streptophyta; Embryophyta; Tracheophyta; Spermatophyta; Magnoliophyta; eudicotyledons; Gunneridae; Pentapetalae; rosids; malvids; Brassicales; Brassicaceae; Camelineae; Arabidopsis`ULP2A_ARATH^ULP2A_ARATH^Q:201-10,H:398-459^53.8%ID^E:1.5e-13^RecName: F…	.	TRINITY_DN76708_c0_g2_i17.p1	219-1010[-]	ULP2A_ARATH^ULP2A_ARATH^Q:1-237,H:167-396^54%ID^E:9.2e-67^RecName: Full=Probable ubiquitin-like-specific protease 2A;^Eukaryota; Viridiplantae; Streptophyta; Embryophyta; Tracheophyta; Spermatophyta; Magnoliophyta; eudicotyledons; Gunneridae; Pentapetalae; rosids; malvids; Brassicales; Brassicaceae; Camelineae; Arabidopsis	PF02902.18^Peptidase_C48^Ulp1 protease family, C-terminal catalytic domain^161-238^E:1.6e-15	.	.	COG5160^SUMO1 sentrin specific peptidase	KEGG:ath:AT4G33620`KO:K08596	GO:0070139^molecular_function^SUMO-specific endopeptidase activity`GO:0016926^biological_process^protein desumoylation	GO:0008234^molecular_function^cysteine-type peptidase activity`GO:0006508^biological_process^proteolysis	.	.
TRINITY_DN76708_c0_g2	TRINITY_DN76708_c0_g2_i8	ULP2B_ARATH^ULP2B_ARATH^Q:326-132,H:338-421^50%ID^E:2.3e-16^RecName: Full=Probable ubiquitin-like-specific protease 2B;^Eukaryota; Viridiplantae; Streptophyta; Embryophyta; Tracheophyta; Spermatophyta; Magnoliophyta; eudicotyledons; Gunneridae; Pentapetalae; rosids; malvids; Brassicales; Brassicaceae; Camelineae; Arabidopsis	.	TRINITY_DN76708_c0_g2_i8.p1	3-311[+]	.	.	.	.	.	.	.	.	.	.
TRINITY_DN76708_c0_g2	TRINITY_DN76708_c0_g2_i3	ULP2B_ARATH^ULP2B_ARATH^Q:909-7,H:263-551^54.5%ID^E:1.5e-89^RecName: Full=Probable ubiquitin-like-specific protease 2B;^Eukaryota; Viridiplantae; Streptophyta; Embryophyta; Tracheophyta; Spermatophyta; Magnoliophyta; eudicotyledons; Gunneridae; Pentapetalae; rosids; malvids; Brassicales; Brassicaceae; Camelineae; Arabidopsis	.	TRINITY_DN76708_c0_g2_i3.p1	1-915[-]	ULP2B_ARATH^ULP2B_ARATH^Q:3-303,H:263-551^54.5%ID^E:1.5e-89^RecName: Full=Probable ubiquitin-like-specific protease 2B;^Eukaryota; Viridiplantae; Streptophyta; Embryophyta; Tracheophyta; Spermatophyta; Magnoliophyta; eudicotyledons; Gunneridae; Pentapetalae; rosids; malvids; Brassicales; Brassicaceae; Camelineae; Arabidopsis	PF02902.18^Peptidase_C48^Ulp1 protease family, C-terminal catalytic domain^161-297^E:2e-25	.	.	COG5160^SUMO1 sentrin specific peptidase	KEGG:ath:AT1G09730`KO:K08596	GO:0070139^molecular_function^SUMO-specific endopeptidase activity`GO:0016926^biological_process^protein desumoylation	GO:0008234^molecular_function^cysteine-type peptidase activity`GO:0006508^biological_process^proteolysis	.	.
TRINITY_DN76708_c0_g2	TRINITY_DN76708_c0_g2_i5	ULP2A_ARATH^ULP2A_ARATH^Q:935-300,H:167-396^52.6%ID^E:5.1e-64^RecName: Full=Probable ubiquitin-like-specific protease 2A;^Eukaryota; Viridiplantae; Streptophyta; Embryophyta; Tracheophyta; Spermatophyta; Magnoliophyta; eudicotyledons; Gunneridae; Pentapetalae; rosids; malvids; Brassicales; Brassicaceae; Camelineae; Arabidopsis`ULP2A_ARATH^ULP2A_ARATH^Q:201-10,H:398-459^53.8%ID^E:1.4e-13^RecName: …	.	TRINITY_DN76708_c0_g2_i5.p1	219-935[-]	ULP2A_ARATH^ULP2A_ARATH^Q:1-212,H:167-396^52.6%ID^E:3.9e-64^RecName: Full=Probable ubiquitin-like-specific protease 2A;^Eukaryota; Viridiplantae; Streptophyta; Embryophyta; Tracheophyta; Spermatophyta; Magnoliophyta; eudicotyledons; Gunneridae; Pentapetalae; rosids; malvids; Brassicales; Brassicaceae; Camelineae; Arabidopsis	PF02902.18^Peptidase_C48^Ulp1 protease family, C-terminal catalytic domain^136-213^E:1.3e-15	.	.	COG5160^SUMO1 sentrin specific peptidase	KEGG:ath:AT4G33620`KO:K08596	GO:0070139^molecular_function^SUMO-specific endopeptidase activity`GO:0016926^biological_process^protein desumoylation	GO:0008234^molecular_function^cysteine-type peptidase activity`GO:0006508^biological_process^proteolysis	.	.
TRINITY_DN76708_c0_g2	TRINITY_DN76708_c0_g2_i7	ULP2A_ARATH^ULP2A_ARATH^Q:1086-10,H:167-459^44.7%ID^E:2.4e-73^RecName: Full=Probable ubiquitin-like-specific protease 2A;^Eukaryota; Viridiplantae; Streptophyta; Embryophyta; Tracheophyta; Spermatophyta; Magnoliophyta; eudicotyledons; Gunneridae; Pentapetalae; rosids; malvids; Brassicales; Brassicaceae; Camelineae; Arabidopsis	.	TRINITY_DN76708_c0_g2_i7.p1	295-1086[-]	ULP2A_ARATH^ULP2A_ARATH^Q:1-237,H:167-396^54%ID^E:9.2e-67^RecName: Full=Probable ubiquitin-like-specific protease 2A;^Eukaryota; Viridiplantae; Streptophyta; Embryophyta; Tracheophyta; Spermatophyta; Magnoliophyta; eudicotyledons; Gunneridae; Pentapetalae; rosids; malvids; Brassicales; Brassicaceae; Camelineae; Arabidopsis	PF02902.18^Peptidase_C48^Ulp1 protease family, C-terminal catalytic domain^161-238^E:1.6e-15	.	.	COG5160^SUMO1 sentrin specific peptidase	KEGG:ath:AT4G33620`KO:K08596	GO:0070139^molecular_function^SUMO-specific endopeptidase activity`GO:0016926^biological_process^protein desumoylation	GO:0008234^molecular_function^cysteine-type peptidase activity`GO:0006508^biological_process^proteolysis	.	.
TRINITY_DN76708_c0_g2	TRINITY_DN76708_c0_g2_i6	ULP2B_ARATH^ULP2B_ARATH^Q:331-62,H:338-421^53.3%ID^E:6.1e-20^RecName: Full=Probable ubiquitin-like-specific protease 2B;^Eukaryota; Viridiplantae; Streptophyta; Embryophyta; Tracheophyta; Spermatophyta; Magnoliophyta; eudicotyledons; Gunneridae; Pentapetalae; rosids; malvids; Brassicales; Brassicaceae; Camelineae; Arabidopsis	.	.	.	.	.	.	.	COG5160^SUMO1 sentrin specific peptidase	KEGG:ath:AT1G09730`KO:K08596	GO:0070139^molecular_function^SUMO-specific endopeptidase activity`GO:0016926^biological_process^protein desumoylation	.	.	.
TRINITY_DN76708_c0_g3	TRINITY_DN76708_c0_g3_i6	ULP2A_ARATH^ULP2A_ARATH^Q:473-252,H:10-81^35.1%ID^E:2.7e-06^RecName: Full=Probable ubiquitin-like-specific protease 2A;^Eukaryota; Viridiplantae; Streptophyta; Embryophyta; Tracheophyta; Spermatophyta; Magnoliophyta; eudicotyledons; Gunneridae; Pentapetalae; rosids; malvids; Brassicales; Brassicaceae; Camelineae; Arabidopsis	.	TRINITY_DN76708_c0_g3_i6.p1	3-485[-]	.	.	.	.	.	.	.	.	.	.
TRINITY_DN76708_c0_g3	TRINITY_DN76708_c0_g3_i7	ULP2A_ARATH^ULP2A_ARATH^Q:473-252,H:10-81^35.1%ID^E:3e-06^RecName: Full=Probable ubiquitin-like-specific protease 2A;^Eukaryota; Viridiplantae; Streptophyta; Embryophyta; Tracheophyta; Spermatophyta; Magnoliophyta; eudicotyledons; Gunneridae; Pentapetalae; rosids; malvids; Brassicales; Brassicaceae; Camelineae; Arabidopsis	.	TRINITY_DN76708_c0_g3_i7.p1	3-485[-]	.	.	.	.	.	.	.	.	.	.
TRINITY_DN76708_c0_g3	TRINITY_DN76708_c0_g3_i4	ULP2A_ARATH^ULP2A_ARATH^Q:560-339,H:10-81^36.5%ID^E:1e-06^RecName: Full=Probable ubiquitin-like-specific protease 2A;^Eukaryota; Viridiplantae; Streptophyta; Embryophyta; Tracheophyta; Spermatophyta; Magnoliophyta; eudicotyledons; Gunneridae; Pentapetalae; rosids; malvids; Brassicales; Brassicaceae; Camelineae; Arabidopsis	.	TRINITY_DN76708_c0_g3_i4.p1	3-575[-]	.	.	.	.	.	.	.	.	.	.
TRINITY_DN76708_c0_g3	TRINITY_DN76708_c0_g3_i5	.	.	.	.	.	.	.	.	.	.	.	.	.	.
TRINITY_DN76708_c0_g3	TRINITY_DN76708_c0_g3_i3	.	.	.	.	.	.	.	.	.	.	.	.	.	.
TRINITY_DN76800_c1_g2	TRINITY_DN76800_c1_g2_i10	PSB5_SPIOL^PSB5_SPIOL^Q:519-1,H:1-172^88.4%ID^E:1.4e-82^RecName: Full=Proteasome subunit beta type-5;^Eukaryota; Viridiplantae; Streptophyta; Embryophyta; Tracheophyta; Spermatophyta; Magnoliophyta; eudicotyledons; Gunneridae; Pentapetalae; Caryophyllales; Chenopodiaceae; Chenopodioideae; Anserineae; Spinacia	.	TRINITY_DN76800_c1_g2_i10.p1	1-702[-]	PSB5_SPIOL^PSB5_SPIOL^Q:62-234,H:1-172^88.4%ID^E:1.4e-82^RecName: Full=Proteasome subunit beta type-5;^Eukaryota; Viridiplantae; Streptophyta; Embryophyta; Tracheophyta; Spermatophyta; Magnoliophyta; eudicotyledons; Gunneridae; Pentapetalae; Caryophyllales; Chenopodiaceae; Chenopodioideae; Anserineae; Spinacia	PF00227.25^Proteasome^Proteasome subunit^116-233^E:1.5e-30	.	ExpAA=13.92^PredHel=1^Topology=i199-221o	.	.	GO:0005737^cellular_component^cytoplasm`GO:0005634^cellular_component^nucleus`GO:0019774^cellular_component^proteasome core complex, beta-subunit complex`GO:0004298^molecular_function^threonine-type endopeptidase activity`GO:0051603^biological_process^proteolysis involved in cellular protein catabolic process	GO:0004298^molecular_function^threonine-type endopeptidase activity`GO:0051603^biological_process^proteolysis involved in cellular protein catabolic process`GO:0005839^cellular_component^proteasome core complex	.	.
TRINITY_DN76800_c1_g2	TRINITY_DN76800_c1_g2_i8	PSB5_SPIOL^PSB5_SPIOL^Q:519-1,H:1-172^88.4%ID^E:1.8e-82^RecName: Full=Proteasome subunit beta type-5;^Eukaryota; Viridiplantae; Streptophyta; Embryophyta; Tracheophyta; Spermatophyta; Magnoliophyta; eudicotyledons; Gunneridae; Pentapetalae; Caryophyllales; Chenopodiaceae; Chenopodioideae; Anserineae; Spinacia	.	TRINITY_DN76800_c1_g2_i8.p1	1-519[-]	PSB5_SPIOL^PSB5_SPIOL^Q:1-173,H:1-172^88.4%ID^E:1.7e-82^RecName: Full=Proteasome subunit beta type-5;^Eukaryota; Viridiplantae; Streptophyta; Embryophyta; Tracheophyta; Spermatophyta; Magnoliophyta; eudicotyledons; Gunneridae; Pentapetalae; Caryophyllales; Chenopodiaceae; Chenopodioideae; Anserineae; Spinacia	PF00227.25^Proteasome^Proteasome subunit^55-172^E:6.3e-31	.	.	.	.	GO:0005737^cellular_component^cytoplasm`GO:0005634^cellular_component^nucleus`GO:0019774^cellular_component^proteasome core complex, beta-subunit complex`GO:0004298^molecular_function^threonine-type endopeptidase activity`GO:0051603^biological_process^proteolysis involved in cellular protein catabolic process	GO:0004298^molecular_function^threonine-type endopeptidase activity`GO:0051603^biological_process^proteolysis involved in cellular protein catabolic process`GO:0005839^cellular_component^proteasome core complex	.	.
TRINITY_DN76800_c1_g2	TRINITY_DN76800_c1_g2_i1	PSB5B_ARATH^PSB5B_ARATH^Q:519-1,H:1-174^86.2%ID^E:2.5e-81^RecName: Full=Proteasome subunit beta type-5-B;^Eukaryota; Viridiplantae; Streptophyta; Embryophyta; Tracheophyta; Spermatophyta; Magnoliophyta; eudicotyledons; Gunneridae; Pentapetalae; rosids; malvids; Brassicales; Brassicaceae; Camelineae; Arabidopsis	.	TRINITY_DN76800_c1_g2_i1.p1	1-519[-]	PSB5B_ARATH^PSB5B_ARATH^Q:1-173,H:1-174^86.2%ID^E:1.9e-81^RecName: Full=Proteasome subunit beta type-5-B;^Eukaryota; Viridiplantae; Streptophyta; Embryophyta; Tracheophyta; Spermatophyta; Magnoliophyta; eudicotyledons; Gunneridae; Pentapetalae; rosids; malvids; Brassicales; Brassicaceae; Camelineae; Arabidopsis	PF00227.25^Proteasome^Proteasome subunit^55-172^E:6.3e-31	.	.	ENOG410XQRP^The proteasome is a multicatalytic proteinase complex which is characterized by its ability to cleave peptides with Arg, Phe, Tyr, Leu, and Glu adjacent to the leaving group at neutral or slightly basic pH. The proteasome has an ATP-dependent proteolytic activity (By similarity)	KEGG:ath:AT3G26340`KO:K02737	GO:0005737^cellular_component^cytoplasm`GO:0005634^cellular_component^nucleus`GO:0000502^cellular_component^proteasome complex`GO:0019774^cellular_component^proteasome core complex, beta-subunit complex`GO:0004298^molecular_function^threonine-type endopeptidase activity`GO:0051603^biological_process^proteolysis involved in cellular protein catabolic process	GO:0004298^molecular_function^threonine-type endopeptidase activity`GO:0051603^biological_process^proteolysis involved in cellular protein catabolic process`GO:0005839^cellular_component^proteasome core complex	.	.
TRINITY_DN76800_c1_g2	TRINITY_DN76800_c1_g2_i2	PSB5_SPIOL^PSB5_SPIOL^Q:519-4,H:1-171^88.4%ID^E:3.8e-82^RecName: Full=Proteasome subunit beta type-5;^Eukaryota; Viridiplantae; Streptophyta; Embryophyta; Tracheophyta; Spermatophyta; Magnoliophyta; eudicotyledons; Gunneridae; Pentapetalae; Caryophyllales; Chenopodiaceae; Chenopodioideae; Anserineae; Spinacia	.	TRINITY_DN76800_c1_g2_i2.p1	1-519[-]	PSB5_SPIOL^PSB5_SPIOL^Q:1-173,H:1-172^88.4%ID^E:1.7e-82^RecName: Full=Proteasome subunit beta type-5;^Eukaryota; Viridiplantae; Streptophyta; Embryophyta; Tracheophyta; Spermatophyta; Magnoliophyta; eudicotyledons; Gunneridae; Pentapetalae; Caryophyllales; Chenopodiaceae; Chenopodioideae; Anserineae; Spinacia	PF00227.25^Proteasome^Proteasome subunit^55-172^E:6.3e-31	.	.	.	.	GO:0005737^cellular_component^cytoplasm`GO:0005634^cellular_component^nucleus`GO:0019774^cellular_component^proteasome core complex, beta-subunit complex`GO:0004298^molecular_function^threonine-type endopeptidase activity`GO:0051603^biological_process^proteolysis involved in cellular protein catabolic process	GO:0004298^molecular_function^threonine-type endopeptidase activity`GO:0051603^biological_process^proteolysis involved in cellular protein catabolic process`GO:0005839^cellular_component^proteasome core complex	.	.
TRINITY_DN76800_c1_g2	TRINITY_DN76800_c1_g2_i3	PSB5A_ARATH^PSB5A_ARATH^Q:319-212,H:84-119^97.2%ID^E:3.1e-14^RecName: Full=Proteasome subunit beta type-5-A;^Eukaryota; Viridiplantae; Streptophyta; Embryophyta; Tracheophyta; Spermatophyta; Magnoliophyta; eudicotyledons; Gunneridae; Pentapetalae; rosids; malvids; Brassicales; Brassicaceae; Camelineae; Arabidopsis	.	.	.	.	.	.	.	.	KEGG:ath:AT1G13060`KO:K02737	GO:0005737^cellular_component^cytoplasm`GO:0005634^cellular_component^nucleus`GO:0019774^cellular_component^proteasome core complex, beta-subunit complex`GO:0004298^molecular_function^threonine-type endopeptidase activity`GO:0051603^biological_process^proteolysis involved in cellular protein catabolic process	.	.	.
TRINITY_DN76800_c1_g2	TRINITY_DN76800_c1_g2_i4	.	.	.	.	.	.	.	.	.	.	.	.	.	.
TRINITY_DN76800_c1_g2	TRINITY_DN76800_c1_g2_i5	PSB5_SPIOL^PSB5_SPIOL^Q:246-94,H:82-132^92.2%ID^E:1.3e-21^RecName: Full=Proteasome subunit beta type-5;^Eukaryota; Viridiplantae; Streptophyta; Embryophyta; Tracheophyta; Spermatophyta; Magnoliophyta; eudicotyledons; Gunneridae; Pentapetalae; Caryophyllales; Chenopodiaceae; Chenopodioideae; Anserineae; Spinacia	.	.	.	.	.	.	.	.	.	GO:0005737^cellular_component^cytoplasm`GO:0005634^cellular_component^nucleus`GO:0019774^cellular_component^proteasome core complex, beta-subunit complex`GO:0004298^molecular_function^threonine-type endopeptidase activity`GO:0051603^biological_process^proteolysis involved in cellular protein catabolic process	.	.	.
TRINITY_DN76800_c1_g2	TRINITY_DN76800_c1_g2_i6	PSB5_SPIOL^PSB5_SPIOL^Q:270-1,H:83-172^93.3%ID^E:1.9e-43^RecName: Full=Proteasome subunit beta type-5;^Eukaryota; Viridiplantae; Streptophyta; Embryophyta; Tracheophyta; Spermatophyta; Magnoliophyta; eudicotyledons; Gunneridae; Pentapetalae; Caryophyllales; Chenopodiaceae; Chenopodioideae; Anserineae; Spinacia	.	.	.	.	.	.	.	.	.	GO:0005737^cellular_component^cytoplasm`GO:0005634^cellular_component^nucleus`GO:0019774^cellular_component^proteasome core complex, beta-subunit complex`GO:0004298^molecular_function^threonine-type endopeptidase activity`GO:0051603^biological_process^proteolysis involved in cellular protein catabolic process	.	.	.
TRINITY_DN76800_c1_g2	TRINITY_DN76800_c1_g2_i7	PSB5_SPIOL^PSB5_SPIOL^Q:519-1,H:1-172^88.4%ID^E:1.7e-82^RecName: Full=Proteasome subunit beta type-5;^Eukaryota; Viridiplantae; Streptophyta; Embryophyta; Tracheophyta; Spermatophyta; Magnoliophyta; eudicotyledons; Gunneridae; Pentapetalae; Caryophyllales; Chenopodiaceae; Chenopodioideae; Anserineae; Spinacia	.	TRINITY_DN76800_c1_g2_i7.p1	1-519[-]	PSB5_SPIOL^PSB5_SPIOL^Q:1-173,H:1-172^88.4%ID^E:1.7e-82^RecName: Full=Proteasome subunit beta type-5;^Eukaryota; Viridiplantae; Streptophyta; Embryophyta; Tracheophyta; Spermatophyta; Magnoliophyta; eudicotyledons; Gunneridae; Pentapetalae; Caryophyllales; Chenopodiaceae; Chenopodioideae; Anserineae; Spinacia	PF00227.25^Proteasome^Proteasome subunit^55-172^E:6.3e-31	.	.	.	.	GO:0005737^cellular_component^cytoplasm`GO:0005634^cellular_component^nucleus`GO:0019774^cellular_component^proteasome core complex, beta-subunit complex`GO:0004298^molecular_function^threonine-type endopeptidase activity`GO:0051603^biological_process^proteolysis involved in cellular protein catabolic process	GO:0004298^molecular_function^threonine-type endopeptidase activity`GO:0051603^biological_process^proteolysis involved in cellular protein catabolic process`GO:0005839^cellular_component^proteasome core complex	.	.
TRINITY_DN76800_c0_g1	TRINITY_DN76800_c0_g1_i4	.	.	TRINITY_DN76800_c0_g1_i4.p1	1-507[-]	.	PF02902.18^Peptidase_C48^Ulp1 protease family, C-terminal catalytic domain^116-159^E:6e-05	.	.	.	.	.	GO:0008234^molecular_function^cysteine-type peptidase activity`GO:0006508^biological_process^proteolysis	.	.
TRINITY_DN76800_c0_g1	TRINITY_DN76800_c0_g1_i5	.	.	TRINITY_DN76800_c0_g1_i5.p1	1-411[-]	.	PF02902.18^Peptidase_C48^Ulp1 protease family, C-terminal catalytic domain^84-127^E:8.4e-05	.	.	.	.	.	GO:0008234^molecular_function^cysteine-type peptidase activity`GO:0006508^biological_process^proteolysis	.	.
TRINITY_DN76800_c0_g1	TRINITY_DN76800_c0_g1_i6	.	.	.	.	.	.	.	.	.	.	.	.	.	.
TRINITY_DN76800_c0_g1	TRINITY_DN76800_c0_g1_i1	.	.	.	.	.	.	.	.	.	.	.	.	.	.
TRINITY_DN76800_c0_g1	TRINITY_DN76800_c0_g1_i2	.	.	.	.	.	.	.	.	.	.	.	.	.	.
TRINITY_DN76800_c0_g1	TRINITY_DN76800_c0_g1_i3	.	.	.	.	.	.	.	.	.	.	.	.	.	.
TRINITY_DN76800_c0_g1	TRINITY_DN76800_c0_g1_i9	.	.	TRINITY_DN76800_c0_g1_i9.p1	1-507[-]	.	PF02902.18^Peptidase_C48^Ulp1 protease family, C-terminal catalytic domain^116-159^E:6e-05	.	.	.	.	.	GO:0008234^molecular_function^cysteine-type peptidase activity`GO:0006508^biological_process^proteolysis	.	.
TRINITY_DN76740_c3_g1	TRINITY_DN76740_c3_g1_i9	RP8L2_ARATH^RP8L2_ARATH^Q:856-437,H:742-880^39.2%ID^E:3.5e-17^RecName: Full=Probable disease resistance RPP8-like protein 2;^Eukaryota; Viridiplantae; Streptophyta; Embryophyta; Tracheophyta; Spermatophyta; Magnoliophyta; eudicotyledons; Gunneridae; Pentapetalae; rosids; malvids; Brassicales; Brassicaceae; Camelineae; Arabidopsis	.	TRINITY_DN76740_c3_g1_i9.p1	362-2050[-]	.	PF13855.5^LRR_8^Leucine rich repeat^258-311^E:1.2e-06	.	.	.	.	.	GO:0005515^molecular_function^protein binding	.	.
TRINITY_DN76740_c3_g1	TRINITY_DN76740_c3_g1_i8	RP8L2_ARATH^RP8L2_ARATH^Q:680-261,H:742-880^39.2%ID^E:3.2e-17^RecName: Full=Probable disease resistance RPP8-like protein 2;^Eukaryota; Viridiplantae; Streptophyta; Embryophyta; Tracheophyta; Spermatophyta; Magnoliophyta; eudicotyledons; Gunneridae; Pentapetalae; rosids; malvids; Brassicales; Brassicaceae; Camelineae; Arabidopsis	.	TRINITY_DN76740_c3_g1_i8.p1	186-1874[-]	.	PF13855.5^LRR_8^Leucine rich repeat^258-311^E:1.2e-06	.	.	.	.	.	GO:0005515^molecular_function^protein binding	.	.
TRINITY_DN76740_c3_g1	TRINITY_DN76740_c3_g1_i3	RP8L2_ARATH^RP8L2_ARATH^Q:517-104,H:742-880^41%ID^E:6.1e-20^RecName: Full=Probable disease resistance RPP8-like protein 2;^Eukaryota; Viridiplantae; Streptophyta; Embryophyta; Tracheophyta; Spermatophyta; Magnoliophyta; eudicotyledons; Gunneridae; Pentapetalae; rosids; malvids; Brassicales; Brassicaceae; Camelineae; Arabidopsis	.	TRINITY_DN76740_c3_g1_i3.p1	11-1675[-]	DRL8_ARATH^DRL8_ARATH^Q:301-546,H:665-906^27.4%ID^E:4.4e-10^RecName: Full=Putative disease resistance protein At1g58400;^Eukaryota; Viridiplantae; Streptophyta; Embryophyta; Tracheophyta; Spermatophyta; Magnoliophyta; eudicotyledons; Gunneridae; Pentapetalae; rosids; malvids; Brassicales; Brassicaceae; Camelineae; Arabidopsis	PF13855.5^LRR_8^Leucine rich repeat^243-297^E:2.6e-07	.	.	COG4886^leucine Rich Repeat	KEGG:ath:AT1G58400	GO:0005886^cellular_component^plasma membrane`GO:0043531^molecular_function^ADP binding`GO:0005524^molecular_function^ATP binding`GO:0006952^biological_process^defense response`GO:0007165^biological_process^signal transduction	GO:0005515^molecular_function^protein binding	.	.
TRINITY_DN76740_c3_g1	TRINITY_DN76740_c3_g1_i2	.	.	.	.	.	.	.	.	.	.	.	.	.	.
TRINITY_DN76740_c3_g1	TRINITY_DN76740_c3_g1_i1	.	.	.	.	.	.	.	.	.	.	.	.	.	.
TRINITY_DN76740_c3_g1	TRINITY_DN76740_c3_g1_i7	RP8L2_ARATH^RP8L2_ARATH^Q:517-104,H:742-880^41%ID^E:5.6e-20^RecName: Full=Probable disease resistance RPP8-like protein 2;^Eukaryota; Viridiplantae; Streptophyta; Embryophyta; Tracheophyta; Spermatophyta; Magnoliophyta; eudicotyledons; Gunneridae; Pentapetalae; rosids; malvids; Brassicales; Brassicaceae; Camelineae; Arabidopsis	.	TRINITY_DN76740_c3_g1_i7.p1	11-1525[-]	DRL8_ARATH^DRL8_ARATH^Q:251-496,H:665-906^27.4%ID^E:4e-10^RecName: Full=Putative disease resistance protein At1g58400;^Eukaryota; Viridiplantae; Streptophyta; Embryophyta; Tracheophyta; Spermatophyta; Magnoliophyta; eudicotyledons; Gunneridae; Pentapetalae; rosids; malvids; Brassicales; Brassicaceae; Camelineae; Arabidopsis	PF13855.5^LRR_8^Leucine rich repeat^194-247^E:6.2e-07	.	.	COG4886^leucine Rich Repeat	KEGG:ath:AT1G58400	GO:0005886^cellular_component^plasma membrane`GO:0043531^molecular_function^ADP binding`GO:0005524^molecular_function^ATP binding`GO:0006952^biological_process^defense response`GO:0007165^biological_process^signal transduction	GO:0005515^molecular_function^protein binding	.	.
TRINITY_DN76740_c3_g1	TRINITY_DN76740_c3_g1_i6	RP8L2_ARATH^RP8L2_ARATH^Q:1285-437,H:601-880^30.1%ID^E:6.8e-19^RecName: Full=Probable disease resistance RPP8-like protein 2;^Eukaryota; Viridiplantae; Streptophyta; Embryophyta; Tracheophyta; Spermatophyta; Magnoliophyta; eudicotyledons; Gunneridae; Pentapetalae; rosids; malvids; Brassicales; Brassicaceae; Camelineae; Arabidopsis	.	TRINITY_DN76740_c3_g1_i6.p1	362-1285[-]	.	PF13855.5^LRR_8^Leucine rich repeat^1-54^E:2.6e-07	.	.	.	.	.	GO:0005515^molecular_function^protein binding	.	.
TRINITY_DN76740_c3_g1	TRINITY_DN76740_c3_g1_i4	RP8L2_ARATH^RP8L2_ARATH^Q:517-104,H:742-880^41%ID^E:4.8e-20^RecName: Full=Probable disease resistance RPP8-like protein 2;^Eukaryota; Viridiplantae; Streptophyta; Embryophyta; Tracheophyta; Spermatophyta; Magnoliophyta; eudicotyledons; Gunneridae; Pentapetalae; rosids; malvids; Brassicales; Brassicaceae; Camelineae; Arabidopsis	.	TRINITY_DN76740_c3_g1_i4.p1	11-1324[-]	DRL8_ARATH^DRL8_ARATH^Q:184-429,H:665-906^27.4%ID^E:3.5e-10^RecName: Full=Putative disease resistance protein At1g58400;^Eukaryota; Viridiplantae; Streptophyta; Embryophyta; Tracheophyta; Spermatophyta; Magnoliophyta; eudicotyledons; Gunneridae; Pentapetalae; rosids; malvids; Brassicales; Brassicaceae; Camelineae; Arabidopsis	PF13855.5^LRR_8^Leucine rich repeat^126-180^E:1.9e-07	.	.	COG4886^leucine Rich Repeat	KEGG:ath:AT1G58400	GO:0005886^cellular_component^plasma membrane`GO:0043531^molecular_function^ADP binding`GO:0005524^molecular_function^ATP binding`GO:0006952^biological_process^defense response`GO:0007165^biological_process^signal transduction	GO:0005515^molecular_function^protein binding	.	.
TRINITY_DN76740_c3_g2	TRINITY_DN76740_c3_g2_i1	PIK2_ORYSJ^PIK2_ORYSJ^Q:870-589,H:480-573^28.7%ID^E:3.6e-07^RecName: Full=Disease resistance protein Pik-2 {ECO:0000305};^Eukaryota; Viridiplantae; Streptophyta; Embryophyta; Tracheophyta; Spermatophyta; Magnoliophyta; Liliopsida; Poales; Poaceae; BOP clade; Oryzoideae; Oryzeae; Oryzinae; Oryza; Oryza sativa	.	TRINITY_DN76740_c3_g2_i1.p1	1-882[-]	.	PF13855.5^LRR_8^Leucine rich repeat^192-245^E:6.2e-07	.	.	.	.	.	GO:0005515^molecular_function^protein binding	.	.
TRINITY_DN76740_c2_g2	TRINITY_DN76740_c2_g2_i2	UVH3_ARATH^UVH3_ARATH^Q:461-105,H:1-119^84.9%ID^E:2.3e-50^RecName: Full=DNA repair protein UVH3;^Eukaryota; Viridiplantae; Streptophyta; Embryophyta; Tracheophyta; Spermatophyta; Magnoliophyta; eudicotyledons; Gunneridae; Pentapetalae; rosids; malvids; Brassicales; Brassicaceae; Camelineae; Arabidopsis	.	TRINITY_DN76740_c2_g2_i2.p1	3-461[-]	UVH3_ARATH^UVH3_ARATH^Q:1-119,H:1-119^84.9%ID^E:1.6e-50^RecName: Full=DNA repair protein UVH3;^Eukaryota; Viridiplantae; Streptophyta; Embryophyta; Tracheophyta; Spermatophyta; Magnoliophyta; eudicotyledons; Gunneridae; Pentapetalae; rosids; malvids; Brassicales; Brassicaceae; Camelineae; Arabidopsis	PF00752.16^XPG_N^XPG N-terminal domain^1-97^E:2e-30	.	.	COG0258^Structure-specific nuclease with 5'-flap endonuclease and 5'-3' exonuclease activities involved in DNA replication and repair. During DNA replication, cleaves the 5'-overhanging flap structure that is generated by displacement synthesis when DNA polymerase encounters the 5'-end of a downstream Okazaki fragment. It enters the flap from the 5'-end and then tracks to cleave the flap base, le…	.	GO:0005634^cellular_component^nucleus`GO:0004519^molecular_function^endonuclease activity`GO:0046872^molecular_function^metal ion binding`GO:0003697^molecular_function^single-stranded DNA binding`GO:0010213^biological_process^non-photoreactive DNA repair`GO:0006289^biological_process^nucleotide-excision repair`GO:0009408^biological_process^response to heat	GO:0004518^molecular_function^nuclease activity`GO:0006281^biological_process^DNA repair	.	.
TRINITY_DN76740_c2_g2	TRINITY_DN76740_c2_g2_i1	UVH3_ARATH^UVH3_ARATH^Q:196-110,H:1-29^89.7%ID^E:7.2e-07^RecName: Full=DNA repair protein UVH3;^Eukaryota; Viridiplantae; Streptophyta; Embryophyta; Tracheophyta; Spermatophyta; Magnoliophyta; eudicotyledons; Gunneridae; Pentapetalae; rosids; malvids; Brassicales; Brassicaceae; Camelineae; Arabidopsis	.	.	.	.	.	.	.	COG0258^Structure-specific nuclease with 5'-flap endonuclease and 5'-3' exonuclease activities involved in DNA replication and repair. During DNA replication, cleaves the 5'-overhanging flap structure that is generated by displacement synthesis when DNA polymerase encounters the 5'-end of a downstream Okazaki fragment. It enters the flap from the 5'-end and then tracks to cleave the flap base, le…	.	GO:0005634^cellular_component^nucleus`GO:0004519^molecular_function^endonuclease activity`GO:0046872^molecular_function^metal ion binding`GO:0003697^molecular_function^single-stranded DNA binding`GO:0010213^biological_process^non-photoreactive DNA repair`GO:0006289^biological_process^nucleotide-excision repair`GO:0009408^biological_process^response to heat	.	.	.
TRINITY_DN76747_c1_g1	TRINITY_DN76747_c1_g1_i8	.	.	TRINITY_DN76747_c1_g1_i8.p1	71-559[+]	.	.	.	.	.	.	.	.	.	.
TRINITY_DN76747_c1_g1	TRINITY_DN76747_c1_g1_i5	.	.	TRINITY_DN76747_c1_g1_i5.p1	71-1051[+]	.	.	.	.	.	.	.	.	.	.
TRINITY_DN76747_c1_g1	TRINITY_DN76747_c1_g1_i4	.	.	.	.	.	.	.	.	.	.	.	.	.	.
TRINITY_DN76747_c1_g1	TRINITY_DN76747_c1_g1_i7	.	.	TRINITY_DN76747_c1_g1_i7.p1	71-874[+]	.	.	.	.	.	.	.	.	.	.
TRINITY_DN76747_c1_g1	TRINITY_DN76747_c1_g1_i6	.	.	TRINITY_DN76747_c1_g1_i6.p1	71-1384[+]	.	.	.	.	.	.	.	.	.	.
TRINITY_DN76747_c1_g1	TRINITY_DN76747_c1_g1_i1	.	.	TRINITY_DN76747_c1_g1_i1.p1	1-315[+]	.	.	.	.	.	.	.	.	.	.
TRINITY_DN76747_c1_g1	TRINITY_DN76747_c1_g1_i3	.	.	TRINITY_DN76747_c1_g1_i3.p1	71-874[+]	.	.	.	.	.	.	.	.	.	.
TRINITY_DN76747_c1_g1	TRINITY_DN76747_c1_g1_i2	.	.	.	.	.	.	.	.	.	.	.	.	.	.
TRINITY_DN76747_c0_g1	TRINITY_DN76747_c0_g1_i1	.	.	TRINITY_DN76747_c0_g1_i1.p1	2-328[-]	.	PF13456.5^RVT_3^Reverse transcriptase-like^3-76^E:5.6e-12	.	.	.	.	.	GO:0003676^molecular_function^nucleic acid binding`GO:0004523^molecular_function^RNA-DNA hybrid ribonuclease activity	.	.
TRINITY_DN76747_c0_g1	TRINITY_DN76747_c0_g1_i3	.	.	TRINITY_DN76747_c0_g1_i3.p1	2-328[-]	.	PF13456.5^RVT_3^Reverse transcriptase-like^3-76^E:5.6e-12	.	.	.	.	.	GO:0003676^molecular_function^nucleic acid binding`GO:0004523^molecular_function^RNA-DNA hybrid ribonuclease activity	.	.
TRINITY_DN76781_c1_g1	TRINITY_DN76781_c1_g1_i5	MOT14_HUMAN^MOT14_HUMAN^Q:296-2419,H:13-495^23.6%ID^E:1e-40^RecName: Full=Monocarboxylate transporter 14;^Eukaryota; Metazoa; Chordata; Craniata; Vertebrata; Euteleostomi; Mammalia; Eutheria; Euarchontoglires; Primates; Haplorrhini; Catarrhini; Hominidae; Homo	.	TRINITY_DN76781_c1_g1_i5.p1	218-2587[+]	MOT12_XENTR^MOT12_XENTR^Q:45-255,H:12-222^37%ID^E:1.1e-35^RecName: Full=Monocarboxylate transporter 12;^Eukaryota; Metazoa; Chordata; Craniata; Vertebrata; Euteleostomi; Amphibia; Batrachia; Anura; Pipoidea; Pipidae; Xenopodinae; Xenopus; Silurana`MOT12_XENTR^MOT12_XENTR^Q:543-733,H:243-435^28.6%ID^E:2.2e-15^RecName: Full=Monocarboxylate transporter 12;^Eukaryota; Metazoa; Chordata; Craniata; Ver…	PF07690.15^MFS_1^Major Facilitator Superfamily^58-243^E:3.2e-20`PF07690.15^MFS_1^Major Facilitator Superfamily^548-668^E:3.5e-08	.	ExpAA=260.98^PredHel=12^Topology=i48-70o90-112i119-138o148-170i177-196o206-225i553-575o590-612i619-637o647-669i681-703o708-730i	.	KEGG:xtr:394932`KO:K11810	GO:0005887^cellular_component^integral component of plasma membrane`GO:0005308^molecular_function^creatine transmembrane transporter activity`GO:0008028^molecular_function^monocarboxylic acid transmembrane transporter activity`GO:0015293^molecular_function^symporter activity`GO:0015881^biological_process^creatine transmembrane transport`GO:0015718^biological_process^monocarboxylic acid transport	GO:0055085^biological_process^transmembrane transport`GO:0016021^cellular_component^integral component of membrane	.	.
TRINITY_DN76781_c1_g1	TRINITY_DN76781_c1_g1_i4	MOT14_HUMAN^MOT14_HUMAN^Q:812-2953,H:13-495^23.4%ID^E:4.2e-40^RecName: Full=Monocarboxylate transporter 14;^Eukaryota; Metazoa; Chordata; Craniata; Vertebrata; Euteleostomi; Mammalia; Eutheria; Euarchontoglires; Primates; Haplorrhini; Catarrhini; Hominidae; Homo	.	TRINITY_DN76781_c1_g1_i4.p1	680-3121[+]	MOT12_XENTR^MOT12_XENTR^Q:63-273,H:12-222^37%ID^E:1.2e-35^RecName: Full=Monocarboxylate transporter 12;^Eukaryota; Metazoa; Chordata; Craniata; Vertebrata; Euteleostomi; Amphibia; Batrachia; Anura; Pipoidea; Pipidae; Xenopodinae; Xenopus; Silurana`MOT12_XENTR^MOT12_XENTR^Q:567-757,H:243-435^28.6%ID^E:2.3e-15^RecName: Full=Monocarboxylate transporter 12;^Eukaryota; Metazoa; Chordata; Craniata; Ver…	PF07690.15^MFS_1^Major Facilitator Superfamily^76-261^E:3.5e-20`PF07690.15^MFS_1^Major Facilitator Superfamily^572-692^E:3.7e-08	.	ExpAA=261.93^PredHel=12^Topology=i66-88o108-130i137-156o166-188i195-214o224-243i577-599o614-636i643-661o671-693i705-727o732-754i	.	KEGG:xtr:394932`KO:K11810	GO:0005887^cellular_component^integral component of plasma membrane`GO:0005308^molecular_function^creatine transmembrane transporter activity`GO:0008028^molecular_function^monocarboxylic acid transmembrane transporter activity`GO:0015293^molecular_function^symporter activity`GO:0015881^biological_process^creatine transmembrane transport`GO:0015718^biological_process^monocarboxylic acid transport	GO:0055085^biological_process^transmembrane transport`GO:0016021^cellular_component^integral component of membrane	.	.
TRINITY_DN76781_c1_g1	TRINITY_DN76781_c1_g1_i7	MOT14_HUMAN^MOT14_HUMAN^Q:812-2953,H:13-495^23.4%ID^E:4.2e-40^RecName: Full=Monocarboxylate transporter 14;^Eukaryota; Metazoa; Chordata; Craniata; Vertebrata; Euteleostomi; Mammalia; Eutheria; Euarchontoglires; Primates; Haplorrhini; Catarrhini; Hominidae; Homo	.	TRINITY_DN76781_c1_g1_i7.p1	680-3121[+]	MOT12_XENTR^MOT12_XENTR^Q:63-273,H:12-222^37%ID^E:1.2e-35^RecName: Full=Monocarboxylate transporter 12;^Eukaryota; Metazoa; Chordata; Craniata; Vertebrata; Euteleostomi; Amphibia; Batrachia; Anura; Pipoidea; Pipidae; Xenopodinae; Xenopus; Silurana`MOT12_XENTR^MOT12_XENTR^Q:567-757,H:243-435^28.6%ID^E:2.3e-15^RecName: Full=Monocarboxylate transporter 12;^Eukaryota; Metazoa; Chordata; Craniata; Ver…	PF07690.15^MFS_1^Major Facilitator Superfamily^76-261^E:3.5e-20`PF07690.15^MFS_1^Major Facilitator Superfamily^572-692^E:3.7e-08	.	ExpAA=261.93^PredHel=12^Topology=i66-88o108-130i137-156o166-188i195-214o224-243i577-599o614-636i643-661o671-693i705-727o732-754i	.	KEGG:xtr:394932`KO:K11810	GO:0005887^cellular_component^integral component of plasma membrane`GO:0005308^molecular_function^creatine transmembrane transporter activity`GO:0008028^molecular_function^monocarboxylic acid transmembrane transporter activity`GO:0015293^molecular_function^symporter activity`GO:0015881^biological_process^creatine transmembrane transport`GO:0015718^biological_process^monocarboxylic acid transport	GO:0055085^biological_process^transmembrane transport`GO:0016021^cellular_component^integral component of membrane	.	.
TRINITY_DN76781_c1_g1	TRINITY_DN76781_c1_g1_i6	MOT14_HUMAN^MOT14_HUMAN^Q:812-2935,H:13-495^23.6%ID^E:1.1e-40^RecName: Full=Monocarboxylate transporter 14;^Eukaryota; Metazoa; Chordata; Craniata; Vertebrata; Euteleostomi; Mammalia; Eutheria; Euarchontoglires; Primates; Haplorrhini; Catarrhini; Hominidae; Homo	.	TRINITY_DN76781_c1_g1_i6.p1	680-3103[+]	MOT12_XENTR^MOT12_XENTR^Q:63-273,H:12-222^37%ID^E:1.2e-35^RecName: Full=Monocarboxylate transporter 12;^Eukaryota; Metazoa; Chordata; Craniata; Vertebrata; Euteleostomi; Amphibia; Batrachia; Anura; Pipoidea; Pipidae; Xenopodinae; Xenopus; Silurana`MOT12_XENTR^MOT12_XENTR^Q:561-751,H:243-435^28.6%ID^E:2.3e-15^RecName: Full=Monocarboxylate transporter 12;^Eukaryota; Metazoa; Chordata; Craniata; Ver…	PF07690.15^MFS_1^Major Facilitator Superfamily^76-261^E:3.3e-20`PF07690.15^MFS_1^Major Facilitator Superfamily^566-686^E:3.6e-08	.	ExpAA=261.94^PredHel=12^Topology=i66-88o108-130i137-156o166-188i195-214o224-243i571-593o608-630i637-655o665-687i699-721o726-748i	.	KEGG:xtr:394932`KO:K11810	GO:0005887^cellular_component^integral component of plasma membrane`GO:0005308^molecular_function^creatine transmembrane transporter activity`GO:0008028^molecular_function^monocarboxylic acid transmembrane transporter activity`GO:0015293^molecular_function^symporter activity`GO:0015881^biological_process^creatine transmembrane transport`GO:0015718^biological_process^monocarboxylic acid transport	GO:0055085^biological_process^transmembrane transport`GO:0016021^cellular_component^integral component of membrane	.	.
TRINITY_DN76781_c1_g1	TRINITY_DN76781_c1_g1_i1	MOT14_HUMAN^MOT14_HUMAN^Q:309-2432,H:13-495^23.6%ID^E:1e-40^RecName: Full=Monocarboxylate transporter 14;^Eukaryota; Metazoa; Chordata; Craniata; Vertebrata; Euteleostomi; Mammalia; Eutheria; Euarchontoglires; Primates; Haplorrhini; Catarrhini; Hominidae; Homo	.	TRINITY_DN76781_c1_g1_i1.p1	153-2600[+]	MOT12_XENTR^MOT12_XENTR^Q:71-281,H:12-222^37%ID^E:1.2e-35^RecName: Full=Monocarboxylate transporter 12;^Eukaryota; Metazoa; Chordata; Craniata; Vertebrata; Euteleostomi; Amphibia; Batrachia; Anura; Pipoidea; Pipidae; Xenopodinae; Xenopus; Silurana`MOT12_XENTR^MOT12_XENTR^Q:569-759,H:243-435^28.6%ID^E:2.3e-15^RecName: Full=Monocarboxylate transporter 12;^Eukaryota; Metazoa; Chordata; Craniata; Ver…	PF07690.15^MFS_1^Major Facilitator Superfamily^84-269^E:3.4e-20`PF07690.15^MFS_1^Major Facilitator Superfamily^574-694^E:3.7e-08	.	ExpAA=261.31^PredHel=12^Topology=i74-96o116-138i145-164o174-196i203-222o232-251i579-601o616-638i645-663o673-695i707-729o734-756i	.	KEGG:xtr:394932`KO:K11810	GO:0005887^cellular_component^integral component of plasma membrane`GO:0005308^molecular_function^creatine transmembrane transporter activity`GO:0008028^molecular_function^monocarboxylic acid transmembrane transporter activity`GO:0015293^molecular_function^symporter activity`GO:0015881^biological_process^creatine transmembrane transport`GO:0015718^biological_process^monocarboxylic acid transport	GO:0055085^biological_process^transmembrane transport`GO:0016021^cellular_component^integral component of membrane	.	.
TRINITY_DN76781_c1_g1	TRINITY_DN76781_c1_g1_i3	MOT14_HUMAN^MOT14_HUMAN^Q:296-2437,H:13-495^23.4%ID^E:3.8e-40^RecName: Full=Monocarboxylate transporter 14;^Eukaryota; Metazoa; Chordata; Craniata; Vertebrata; Euteleostomi; Mammalia; Eutheria; Euarchontoglires; Primates; Haplorrhini; Catarrhini; Hominidae; Homo	.	TRINITY_DN76781_c1_g1_i3.p1	218-2605[+]	MOT12_XENTR^MOT12_XENTR^Q:45-255,H:12-222^37%ID^E:1.1e-35^RecName: Full=Monocarboxylate transporter 12;^Eukaryota; Metazoa; Chordata; Craniata; Vertebrata; Euteleostomi; Amphibia; Batrachia; Anura; Pipoidea; Pipidae; Xenopodinae; Xenopus; Silurana`MOT12_XENTR^MOT12_XENTR^Q:549-739,H:243-435^28.6%ID^E:2.2e-15^RecName: Full=Monocarboxylate transporter 12;^Eukaryota; Metazoa; Chordata; Craniata; Ver…	PF07690.15^MFS_1^Major Facilitator Superfamily^58-243^E:2.8e-20`PF07690.15^MFS_1^Major Facilitator Superfamily^554-674^E:3.5e-08	.	ExpAA=260.97^PredHel=12^Topology=i48-70o90-112i119-138o148-170i177-196o206-225i559-581o596-618i625-643o653-675i687-709o714-736i	.	KEGG:xtr:394932`KO:K11810	GO:0005887^cellular_component^integral component of plasma membrane`GO:0005308^molecular_function^creatine transmembrane transporter activity`GO:0008028^molecular_function^monocarboxylic acid transmembrane transporter activity`GO:0015293^molecular_function^symporter activity`GO:0015881^biological_process^creatine transmembrane transport`GO:0015718^biological_process^monocarboxylic acid transport	GO:0055085^biological_process^transmembrane transport`GO:0016021^cellular_component^integral component of membrane	.	.
TRINITY_DN76781_c1_g1	TRINITY_DN76781_c1_g1_i2	MOT14_HUMAN^MOT14_HUMAN^Q:296-2437,H:13-495^23.4%ID^E:3.8e-40^RecName: Full=Monocarboxylate transporter 14;^Eukaryota; Metazoa; Chordata; Craniata; Vertebrata; Euteleostomi; Mammalia; Eutheria; Euarchontoglires; Primates; Haplorrhini; Catarrhini; Hominidae; Homo	.	TRINITY_DN76781_c1_g1_i2.p1	218-2605[+]	MOT12_XENTR^MOT12_XENTR^Q:45-255,H:12-222^37%ID^E:1.1e-35^RecName: Full=Monocarboxylate transporter 12;^Eukaryota; Metazoa; Chordata; Craniata; Vertebrata; Euteleostomi; Amphibia; Batrachia; Anura; Pipoidea; Pipidae; Xenopodinae; Xenopus; Silurana`MOT12_XENTR^MOT12_XENTR^Q:549-739,H:243-435^28.6%ID^E:2.2e-15^RecName: Full=Monocarboxylate transporter 12;^Eukaryota; Metazoa; Chordata; Craniata; Ver…	PF07690.15^MFS_1^Major Facilitator Superfamily^58-243^E:2.8e-20`PF07690.15^MFS_1^Major Facilitator Superfamily^554-674^E:3.5e-08	.	ExpAA=260.97^PredHel=12^Topology=i48-70o90-112i119-138o148-170i177-196o206-225i559-581o596-618i625-643o653-675i687-709o714-736i	.	KEGG:xtr:394932`KO:K11810	GO:0005887^cellular_component^integral component of plasma membrane`GO:0005308^molecular_function^creatine transmembrane transporter activity`GO:0008028^molecular_function^monocarboxylic acid transmembrane transporter activity`GO:0015293^molecular_function^symporter activity`GO:0015881^biological_process^creatine transmembrane transport`GO:0015718^biological_process^monocarboxylic acid transport	GO:0055085^biological_process^transmembrane transport`GO:0016021^cellular_component^integral component of membrane	.	.
TRINITY_DN76781_c2_g1	TRINITY_DN76781_c2_g1_i1	AN13C_HUMAN^AN13C_HUMAN^Q:3-968,H:222-541^65.5%ID^E:2.9e-125^RecName: Full=Ankyrin repeat domain-containing protein 13C;^Eukaryota; Metazoa; Chordata; Craniata; Vertebrata; Euteleostomi; Mammalia; Eutheria; Euarchontoglires; Primates; Haplorrhini; Catarrhini; Hominidae; Homo	.	TRINITY_DN76781_c2_g1_i1.p1	3-971[+]	AN13C_HUMAN^AN13C_HUMAN^Q:1-322,H:222-541^65.5%ID^E:1.4e-125^RecName: Full=Ankyrin repeat domain-containing protein 13C;^Eukaryota; Metazoa; Chordata; Craniata; Vertebrata; Euteleostomi; Mammalia; Eutheria; Euarchontoglires; Primates; Haplorrhini; Catarrhini; Hominidae; Homo	PF11904.7^GPCR_chapero_1^GPCR-chaperone^38-299^E:6.7e-70	.	.	ENOG410XNMS^ankyrin repeat domain	KEGG:hsa:81573`KO:K21437	GO:0005783^cellular_component^endoplasmic reticulum`GO:0005789^cellular_component^endoplasmic reticulum membrane`GO:0048471^cellular_component^perinuclear region of cytoplasm`GO:0005102^molecular_function^signaling receptor binding`GO:0006621^biological_process^protein retention in ER lumen`GO:2000209^biological_process^regulation of anoikis`GO:0010869^biological_process^regulation of receptor bi…	.	.	.
TRINITY_DN76736_c4_g1	TRINITY_DN76736_c4_g1_i1	.	.	.	.	.	.	.	.	.	.	.	.	.	.
TRINITY_DN76736_c4_g1	TRINITY_DN76736_c4_g1_i2	RMA1_CAPAN^RMA1_CAPAN^Q:330-1091,H:5-252^53.9%ID^E:1.1e-68^RecName: Full=E3 ubiquitin-protein ligase RMA1H1;^Eukaryota; Viridiplantae; Streptophyta; Embryophyta; Tracheophyta; Spermatophyta; Magnoliophyta; eudicotyledons; Gunneridae; Pentapetalae; asterids; lamiids; Solanales; Solanaceae; Solanoideae; Capsiceae; Capsicum	.	TRINITY_DN76736_c4_g1_i2.p1	330-1094[+]	RMA1_CAPAN^RMA1_CAPAN^Q:1-254,H:5-252^53.9%ID^E:2.1e-68^RecName: Full=E3 ubiquitin-protein ligase RMA1H1;^Eukaryota; Viridiplantae; Streptophyta; Embryophyta; Tracheophyta; Spermatophyta; Magnoliophyta; eudicotyledons; Gunneridae; Pentapetalae; asterids; lamiids; Solanales; Solanaceae; Solanoideae; Capsiceae; Capsicum	PF13920.5^zf-C3HC4_3^Zinc finger, C3HC4 type (RING finger)^41-95^E:9.9e-09`PF13639.5^zf-RING_2^Ring finger domain^41-90^E:4.9e-08`PF13923.5^zf-C3HC4_2^Zinc finger, C3HC4 type (RING finger)^42-73^E:4.2e-08`PF00097.24^zf-C3HC4^Zinc finger, C3HC4 type (RING finger)^42-89^E:5.8e-09`PF13445.5^zf-RING_UBOX^RING-type zinc-finger^42-87^E:6.6e-09`PF15227.5^zf-C3HC4_4^zinc finger of C3HC4-type, RING^42-89^…	.	ExpAA=20.17^PredHel=1^Topology=i236-253o	.	KEGG:cann:107855034`KO:K10666	GO:0005789^cellular_component^endoplasmic reticulum membrane`GO:0016021^cellular_component^integral component of membrane`GO:0046872^molecular_function^metal ion binding`GO:0004842^molecular_function^ubiquitin-protein transferase activity`GO:0043161^biological_process^proteasome-mediated ubiquitin-dependent protein catabolic process`GO:0016567^biological_process^protein ubiquitination`GO:0009409^…	GO:0046872^molecular_function^metal ion binding	.	.
TRINITY_DN76762_c0_g2	TRINITY_DN76762_c0_g2_i11	NDK1_SOYBN^NDK1_SOYBN^Q:389-3,H:19-147^84.5%ID^E:7.8e-61^RecName: Full=Nucleoside diphosphate kinase 1;^Eukaryota; Viridiplantae; Streptophyta; Embryophyta; Tracheophyta; Spermatophyta; Magnoliophyta; eudicotyledons; Gunneridae; Pentapetalae; rosids; fabids; Fabales; Fabaceae; Papilionoideae; Phaseoleae; Glycine; Soja	.	.	.	.	.	.	.	COG0105^Major role in the synthesis of nucleoside triphosphates other than ATP. The ATP gamma phosphate is transferred to the NDP beta phosphate via a ping-pong mechanism, using a phosphorylated active-site intermediate (By similarity)	KEGG:gmx:547870`KO:K00940	GO:0005622^cellular_component^intracellular`GO:0005524^molecular_function^ATP binding`GO:0046872^molecular_function^metal ion binding`GO:0004550^molecular_function^nucleoside diphosphate kinase activity`GO:0006241^biological_process^CTP biosynthetic process`GO:0006183^biological_process^GTP biosynthetic process`GO:0006228^biological_process^UTP biosynthetic process	.	.	.
TRINITY_DN76762_c0_g2	TRINITY_DN76762_c0_g2_i10	.	.	.	.	.	.	.	.	.	.	.	.	.	.
TRINITY_DN76762_c0_g2	TRINITY_DN76762_c0_g2_i13	NDK1_SOYBN^NDK1_SOYBN^Q:389-3,H:19-147^84.5%ID^E:7.2e-61^RecName: Full=Nucleoside diphosphate kinase 1;^Eukaryota; Viridiplantae; Streptophyta; Embryophyta; Tracheophyta; Spermatophyta; Magnoliophyta; eudicotyledons; Gunneridae; Pentapetalae; rosids; fabids; Fabales; Fabaceae; Papilionoideae; Phaseoleae; Glycine; Soja	.	.	.	.	.	.	.	COG0105^Major role in the synthesis of nucleoside triphosphates other than ATP. The ATP gamma phosphate is transferred to the NDP beta phosphate via a ping-pong mechanism, using a phosphorylated active-site intermediate (By similarity)	KEGG:gmx:547870`KO:K00940	GO:0005622^cellular_component^intracellular`GO:0005524^molecular_function^ATP binding`GO:0046872^molecular_function^metal ion binding`GO:0004550^molecular_function^nucleoside diphosphate kinase activity`GO:0006241^biological_process^CTP biosynthetic process`GO:0006183^biological_process^GTP biosynthetic process`GO:0006228^biological_process^UTP biosynthetic process	.	.	.
TRINITY_DN76762_c0_g2	TRINITY_DN76762_c0_g2_i12	.	.	.	.	.	.	.	.	.	.	.	.	.	.
TRINITY_DN76762_c0_g2	TRINITY_DN76762_c0_g2_i9	NDK1_ARATH^NDK1_ARATH^Q:440-3,H:1-146^85.6%ID^E:9e-71^RecName: Full=Nucleoside diphosphate kinase 1;^Eukaryota; Viridiplantae; Streptophyta; Embryophyta; Tracheophyta; Spermatophyta; Magnoliophyta; eudicotyledons; Gunneridae; Pentapetalae; rosids; malvids; Brassicales; Brassicaceae; Camelineae; Arabidopsis	.	TRINITY_DN76762_c0_g2_i9.p1	3-440[-]	NDK1_ARATH^NDK1_ARATH^Q:1-146,H:1-146^85.6%ID^E:3.4e-71^RecName: Full=Nucleoside diphosphate kinase 1;^Eukaryota; Viridiplantae; Streptophyta; Embryophyta; Tracheophyta; Spermatophyta; Magnoliophyta; eudicotyledons; Gunneridae; Pentapetalae; rosids; malvids; Brassicales; Brassicaceae; Camelineae; Arabidopsis	PF00334.18^NDK^Nucleoside diphosphate kinase^2-133^E:1.9e-54	.	.	COG0105^Major role in the synthesis of nucleoside triphosphates other than ATP. The ATP gamma phosphate is transferred to the NDP beta phosphate via a ping-pong mechanism, using a phosphorylated active-site intermediate (By similarity)	KEGG:ath:AT4G09320`KO:K00940	GO:0005634^cellular_component^nucleus`GO:0005777^cellular_component^peroxisome`GO:0005524^molecular_function^ATP binding`GO:0046872^molecular_function^metal ion binding`GO:0004550^molecular_function^nucleoside diphosphate kinase activity`GO:0070301^biological_process^cellular response to hydrogen peroxide`GO:0006241^biological_process^CTP biosynthetic process`GO:0006183^biological_process^GTP bio…	.	.	.
TRINITY_DN76762_c0_g2	TRINITY_DN76762_c0_g2_i8	NDK1_TOBAC^NDK1_TOBAC^Q:131-9,H:1-41^78%ID^E:1.4e-09^RecName: Full=Nucleoside diphosphate kinase 1;^Eukaryota; Viridiplantae; Streptophyta; Embryophyta; Tracheophyta; Spermatophyta; Magnoliophyta; eudicotyledons; Gunneridae; Pentapetalae; asterids; lamiids; Solanales; Solanaceae; Nicotianoideae; Nicotianeae; Nicotiana	.	.	.	.	.	.	.	.	KEGG:nta:107790563`KO:K00940	GO:0005524^molecular_function^ATP binding`GO:0046872^molecular_function^metal ion binding`GO:0004550^molecular_function^nucleoside diphosphate kinase activity`GO:0006241^biological_process^CTP biosynthetic process`GO:0006183^biological_process^GTP biosynthetic process`GO:0006228^biological_process^UTP biosynthetic process	.	.	.
TRINITY_DN76762_c0_g2	TRINITY_DN76762_c0_g2_i1	NDK1_ARATH^NDK1_ARATH^Q:440-3,H:1-146^84.2%ID^E:7.6e-70^RecName: Full=Nucleoside diphosphate kinase 1;^Eukaryota; Viridiplantae; Streptophyta; Embryophyta; Tracheophyta; Spermatophyta; Magnoliophyta; eudicotyledons; Gunneridae; Pentapetalae; rosids; malvids; Brassicales; Brassicaceae; Camelineae; Arabidopsis	.	TRINITY_DN76762_c0_g2_i1.p1	3-440[-]	NDK1_SOYBN^NDK1_SOYBN^Q:2-146,H:3-147^85.5%ID^E:2.9e-70^RecName: Full=Nucleoside diphosphate kinase 1;^Eukaryota; Viridiplantae; Streptophyta; Embryophyta; Tracheophyta; Spermatophyta; Magnoliophyta; eudicotyledons; Gunneridae; Pentapetalae; rosids; fabids; Fabales; Fabaceae; Papilionoideae; Phaseoleae; Glycine; Soja	PF00334.18^NDK^Nucleoside diphosphate kinase^2-133^E:2.4e-53	.	.	COG0105^Major role in the synthesis of nucleoside triphosphates other than ATP. The ATP gamma phosphate is transferred to the NDP beta phosphate via a ping-pong mechanism, using a phosphorylated active-site intermediate (By similarity)	KEGG:gmx:547870`KO:K00940	GO:0005622^cellular_component^intracellular`GO:0005524^molecular_function^ATP binding`GO:0046872^molecular_function^metal ion binding`GO:0004550^molecular_function^nucleoside diphosphate kinase activity`GO:0006241^biological_process^CTP biosynthetic process`GO:0006183^biological_process^GTP biosynthetic process`GO:0006228^biological_process^UTP biosynthetic process	.	.	.
TRINITY_DN76762_c0_g2	TRINITY_DN76762_c0_g2_i3	.	.	.	.	.	.	.	.	.	.	.	.	.	.
TRINITY_DN76762_c0_g2	TRINITY_DN76762_c0_g2_i2	NDK1_SOYBN^NDK1_SOYBN^Q:389-3,H:19-147^84.5%ID^E:1.2e-60^RecName: Full=Nucleoside diphosphate kinase 1;^Eukaryota; Viridiplantae; Streptophyta; Embryophyta; Tracheophyta; Spermatophyta; Magnoliophyta; eudicotyledons; Gunneridae; Pentapetalae; rosids; fabids; Fabales; Fabaceae; Papilionoideae; Phaseoleae; Glycine; Soja	.	TRINITY_DN76762_c0_g2_i2.p1	556-1023[+]	.	PF14223.5^Retrotran_gag_2^gag-polypeptide of LTR copia-type^60-149^E:1.2e-09	.	.	.	.	.	.	.	.
TRINITY_DN76762_c0_g2	TRINITY_DN76762_c0_g2_i5	.	.	TRINITY_DN76762_c0_g2_i5.p1	376-843[+]	.	PF14223.5^Retrotran_gag_2^gag-polypeptide of LTR copia-type^60-149^E:1.2e-09	.	.	.	.	.	.	.	.
TRINITY_DN76762_c0_g2	TRINITY_DN76762_c0_g2_i4	NDK1_TOBAC^NDK1_TOBAC^Q:260-141,H:1-40^87.5%ID^E:3.7e-12^RecName: Full=Nucleoside diphosphate kinase 1;^Eukaryota; Viridiplantae; Streptophyta; Embryophyta; Tracheophyta; Spermatophyta; Magnoliophyta; eudicotyledons; Gunneridae; Pentapetalae; asterids; lamiids; Solanales; Solanaceae; Nicotianoideae; Nicotianeae; Nicotiana	.	.	.	.	.	.	.	.	KEGG:nta:107790563`KO:K00940	GO:0005524^molecular_function^ATP binding`GO:0046872^molecular_function^metal ion binding`GO:0004550^molecular_function^nucleoside diphosphate kinase activity`GO:0006241^biological_process^CTP biosynthetic process`GO:0006183^biological_process^GTP biosynthetic process`GO:0006228^biological_process^UTP biosynthetic process	.	.	.
TRINITY_DN76762_c0_g2	TRINITY_DN76762_c0_g2_i7	NDK1_ARATH^NDK1_ARATH^Q:440-3,H:1-146^85.6%ID^E:9.1e-71^RecName: Full=Nucleoside diphosphate kinase 1;^Eukaryota; Viridiplantae; Streptophyta; Embryophyta; Tracheophyta; Spermatophyta; Magnoliophyta; eudicotyledons; Gunneridae; Pentapetalae; rosids; malvids; Brassicales; Brassicaceae; Camelineae; Arabidopsis	.	TRINITY_DN76762_c0_g2_i7.p1	3-440[-]	NDK1_ARATH^NDK1_ARATH^Q:1-146,H:1-146^85.6%ID^E:3.4e-71^RecName: Full=Nucleoside diphosphate kinase 1;^Eukaryota; Viridiplantae; Streptophyta; Embryophyta; Tracheophyta; Spermatophyta; Magnoliophyta; eudicotyledons; Gunneridae; Pentapetalae; rosids; malvids; Brassicales; Brassicaceae; Camelineae; Arabidopsis	PF00334.18^NDK^Nucleoside diphosphate kinase^2-133^E:1.9e-54	.	.	COG0105^Major role in the synthesis of nucleoside triphosphates other than ATP. The ATP gamma phosphate is transferred to the NDP beta phosphate via a ping-pong mechanism, using a phosphorylated active-site intermediate (By similarity)	KEGG:ath:AT4G09320`KO:K00940	GO:0005634^cellular_component^nucleus`GO:0005777^cellular_component^peroxisome`GO:0005524^molecular_function^ATP binding`GO:0046872^molecular_function^metal ion binding`GO:0004550^molecular_function^nucleoside diphosphate kinase activity`GO:0070301^biological_process^cellular response to hydrogen peroxide`GO:0006241^biological_process^CTP biosynthetic process`GO:0006183^biological_process^GTP bio…	.	.	.
TRINITY_DN76762_c0_g2	TRINITY_DN76762_c0_g2_i6	NDK1_SOYBN^NDK1_SOYBN^Q:422-3,H:8-147^84.3%ID^E:3.2e-66^RecName: Full=Nucleoside diphosphate kinase 1;^Eukaryota; Viridiplantae; Streptophyta; Embryophyta; Tracheophyta; Spermatophyta; Magnoliophyta; eudicotyledons; Gunneridae; Pentapetalae; rosids; fabids; Fabales; Fabaceae; Papilionoideae; Phaseoleae; Glycine; Soja	.	TRINITY_DN76762_c0_g2_i6.p1	3-422[-]	NDK1_SOYBN^NDK1_SOYBN^Q:1-140,H:8-147^84.3%ID^E:3.2e-66^RecName: Full=Nucleoside diphosphate kinase 1;^Eukaryota; Viridiplantae; Streptophyta; Embryophyta; Tracheophyta; Spermatophyta; Magnoliophyta; eudicotyledons; Gunneridae; Pentapetalae; rosids; fabids; Fabales; Fabaceae; Papilionoideae; Phaseoleae; Glycine; Soja	PF00334.18^NDK^Nucleoside diphosphate kinase^1-127^E:7.1e-49	.	.	COG0105^Major role in the synthesis of nucleoside triphosphates other than ATP. The ATP gamma phosphate is transferred to the NDP beta phosphate via a ping-pong mechanism, using a phosphorylated active-site intermediate (By similarity)	KEGG:gmx:547870`KO:K00940	GO:0005622^cellular_component^intracellular`GO:0005524^molecular_function^ATP binding`GO:0046872^molecular_function^metal ion binding`GO:0004550^molecular_function^nucleoside diphosphate kinase activity`GO:0006241^biological_process^CTP biosynthetic process`GO:0006183^biological_process^GTP biosynthetic process`GO:0006228^biological_process^UTP biosynthetic process	.	.	.
TRINITY_DN76789_c2_g2	TRINITY_DN76789_c2_g2_i3	APM1_ARATH^APM1_ARATH^Q:1222-659,H:689-877^51.3%ID^E:1.9e-50^RecName: Full=Aminopeptidase M1;^Eukaryota; Viridiplantae; Streptophyta; Embryophyta; Tracheophyta; Spermatophyta; Magnoliophyta; eudicotyledons; Gunneridae; Pentapetalae; rosids; malvids; Brassicales; Brassicaceae; Camelineae; Arabidopsis	.	TRINITY_DN76789_c2_g2_i3.p1	647-1222[-]	APM1_ARATH^APM1_ARATH^Q:1-188,H:689-877^51.3%ID^E:1.1e-50^RecName: Full=Aminopeptidase M1;^Eukaryota; Viridiplantae; Streptophyta; Embryophyta; Tracheophyta; Spermatophyta; Magnoliophyta; eudicotyledons; Gunneridae; Pentapetalae; rosids; malvids; Brassicales; Brassicaceae; Camelineae; Arabidopsis	PF11838.7^ERAP1_C^ERAP1-like C-terminal domain^2-165^E:3e-39	.	.	COG0308^aminopeptidase	KEGG:ath:AT4G33090`KO:K08776	GO:0005829^cellular_component^cytosol`GO:0005783^cellular_component^endoplasmic reticulum`GO:0031090^cellular_component^organelle membrane`GO:0005886^cellular_component^plasma membrane`GO:0004177^molecular_function^aminopeptidase activity`GO:0070006^molecular_function^metalloaminopeptidase activity`GO:0010013^molecular_function^N-1-naphthylphthalamic acid binding`GO:0042277^molecular_function^pep…	.	.	.
TRINITY_DN76789_c2_g2	TRINITY_DN76789_c2_g2_i2	APM1_ARATH^APM1_ARATH^Q:222-4,H:746-819^52.7%ID^E:2.6e-16^RecName: Full=Aminopeptidase M1;^Eukaryota; Viridiplantae; Streptophyta; Embryophyta; Tracheophyta; Spermatophyta; Magnoliophyta; eudicotyledons; Gunneridae; Pentapetalae; rosids; malvids; Brassicales; Brassicaceae; Camelineae; Arabidopsis`APM1_ARATH^APM1_ARATH^Q:481-311,H:689-745^50.9%ID^E:2.4e-09^RecName: Full=Aminopeptidase M1;^Eukaryot…	.	.	.	.	.	.	.	COG0308^aminopeptidase	KEGG:ath:AT4G33090`KO:K08776	GO:0005829^cellular_component^cytosol`GO:0005783^cellular_component^endoplasmic reticulum`GO:0031090^cellular_component^organelle membrane`GO:0005886^cellular_component^plasma membrane`GO:0004177^molecular_function^aminopeptidase activity`GO:0070006^molecular_function^metalloaminopeptidase activity`GO:0010013^molecular_function^N-1-naphthylphthalamic acid binding`GO:0042277^molecular_function^pep…	.	.	.
TRINITY_DN76789_c2_g2	TRINITY_DN76789_c2_g2_i1	APM1_ARATH^APM1_ARATH^Q:1434-871,H:689-877^51.3%ID^E:2.2e-50^RecName: Full=Aminopeptidase M1;^Eukaryota; Viridiplantae; Streptophyta; Embryophyta; Tracheophyta; Spermatophyta; Magnoliophyta; eudicotyledons; Gunneridae; Pentapetalae; rosids; malvids; Brassicales; Brassicaceae; Camelineae; Arabidopsis	.	TRINITY_DN76789_c2_g2_i1.p1	859-1434[-]	APM1_ARATH^APM1_ARATH^Q:1-188,H:689-877^51.3%ID^E:1.1e-50^RecName: Full=Aminopeptidase M1;^Eukaryota; Viridiplantae; Streptophyta; Embryophyta; Tracheophyta; Spermatophyta; Magnoliophyta; eudicotyledons; Gunneridae; Pentapetalae; rosids; malvids; Brassicales; Brassicaceae; Camelineae; Arabidopsis	PF11838.7^ERAP1_C^ERAP1-like C-terminal domain^2-165^E:3e-39	.	.	COG0308^aminopeptidase	KEGG:ath:AT4G33090`KO:K08776	GO:0005829^cellular_component^cytosol`GO:0005783^cellular_component^endoplasmic reticulum`GO:0031090^cellular_component^organelle membrane`GO:0005886^cellular_component^plasma membrane`GO:0004177^molecular_function^aminopeptidase activity`GO:0070006^molecular_function^metalloaminopeptidase activity`GO:0010013^molecular_function^N-1-naphthylphthalamic acid binding`GO:0042277^molecular_function^pep…	.	.	.
[truncated: 103,962 more rows]
